# Supplementary material for: NF-Y coassociates with FOS at promoters, enhancers, repetitive elements, and inactive chromatin regions, and is stereo-positioned with growth-controlling transcription factors
Source: HighWire-hosted journal article supplement (doi:10.1101/gr.148080.112), 2013-04-17
Supplement: SuppTables.xlsx [file SuppTables.xlsx]

## Sheet: K562_YB_peaks_Table.1
K562 NF-YB ChIP-Seq peaks (p-value <=1e-09)										Repeat
chr	start	end	length	summit	summit coordinate	tags	-10*log10(pvalue)	fold enrichment	cluster name	chr	str	end	name	type	class
chr1	703816	704108	293	178	703994	55	858.75	157.05	K	N/A	N/A	N/A	N/A	N/A	N/A
chr1	925096	925788	693	334	925430	54	421.76	52.07	V	N/A	N/A	N/A	N/A	N/A	N/A
chr1	942948	943388	441	164	943112	17	121.88	19.16	R	chr1	942412	944119	LTR12C	LTR	ERV1
chr1	944500	945018	519	300	944800	51	502.33	61.12	S	chr1	944772	944873	GC_rich	Low_complexity	Low_complexity
chr1	958203	958636	434	226	958429	59	613.8	67.08	Q	N/A	N/A	N/A	N/A	N/A	N/A
chr1	999388	999799	412	207	999595	17	139.75	25.51	D	N/A	N/A	N/A	N/A	N/A	N/A
chr1	1005224	1005920	697	332	1005556	119	1521.29	175.64	T	N/A	N/A	N/A	N/A	N/A	N/A
chr1	1032331	1033008	678	473	1032804	37	338.56	50.4	G	chr1	1031856	1033288	LTR12C	LTR	ERV1
chr1	1034934	1035345	412	214	1035148	21	119.77	18.87	G	chr1	1034962	1035595	MER49	LTR	ERV1
chr1	1156722	1157752	1031	628	1157350	202	1930.57	109.98	B	N/A	N/A	N/A	N/A	N/A	N/A
chr1	1249474	1249817	344	96	1249570	12	116.87	26.81	V	N/A	N/A	N/A	N/A	N/A	N/A
chr1	1324150	1325077	928	513	1324663	140	1937.03	249.31	K	N/A	N/A	N/A	N/A	N/A	N/A
chr1	1436711	1437496	786	601	1437312	135	1246.01	88.08	S	N/A	N/A	N/A	N/A	N/A	N/A
chr1	1971313	1971944	632	304	1971617	54	574.03	98.26	D	N/A	N/A	N/A	N/A	N/A	N/A
chr1	2058265	2058799	535	313	2058578	28	197.72	38.98	A	chr1	2058197	2058776	MLT2B3	LTR	ERVL
chr1	2101621	2102161	541	146	2101767	38	165.45	13.87	V	chr1	2101751	2101909	(CGGA)n	Simple_repeat	Simple_repeat
chr1	2110704	2111323	620	338	2111042	32	154.52	20.96	R	N/A	N/A	N/A	N/A	N/A	N/A
chr1	2120486	2121011	526	284	2120770	89	717.41	46.22	U	N/A	N/A	N/A	N/A	N/A	N/A
chr1	2136144	2136466	323	192	2136336	19	143.49	20.42	D	N/A	N/A	N/A	N/A	N/A	N/A
chr1	2292604	2292931	328	104	2292708	11	97.13	25.13	A	chr1	2292631	2292928	L1MEc	LINE	L1
chr1	2312487	2313227	741	360	2312847	76	543.87	30.72	S	N/A	N/A	N/A	N/A	N/A	N/A
chr1	2330271	2330708	438	149	2330420	18	110.23	20.42	R	N/A	N/A	N/A	N/A	N/A	N/A
chr1	2467044	2468120	1077	614	2467658	121	886.08	76.51	K	N/A	N/A	N/A	N/A	N/A	N/A
chr1	2505046	2505530	485	295	2505341	57	516.81	60.38	R	chr1	2505301	2505591	MLT1I	LTR	MaLR
chr1	2720285	2720726	442	194	2720479	27	302.65	84.27	J	chr1	2719523	2720912	LTR12C	LTR	ERV1
chr1	2746365	2746757	393	292	2746657	18	172.99	38.64	J	chr1	2746304	2746839	MER51A	LTR	ERV1
chr1	3525476	3525807	332	118	3525594	21	103.29	12.44	A	N/A	N/A	N/A	N/A	N/A	N/A
chr1	3530905	3531745	841	421	3531326	275	3100	228.32	V	N/A	N/A	N/A	N/A	N/A	N/A
chr1	3556210	3556930	721	358	3556568	94	806.89	70.56	U	N/A	N/A	N/A	N/A	N/A	N/A
chr1	3699978	3700439	462	270	3700248	26	178.8	29.75	P	chr1	3699816	3700338	LTR8A	LTR	ERV1
chr1	3806334	3807104	771	344	3806678	64	388.25	31.28	B	N/A	N/A	N/A	N/A	N/A	N/A
chr1	3807548	3808077	530	337	3807885	45	258.74	28.11	B	N/A	N/A	N/A	N/A	N/A	N/A
chr1	3828452	3829171	720	329	3828781	78	876.8	112.55	J	chr1	3828480	3829122	MER51A	LTR	ERV1
chr1	3899146	3899926	781	346	3899492	106	1185.49	118.71	A	chr1	3899237	3899573	MLT1K	LTR	MaLR
chr1	4441947	4442489	543	116	4442063	25	182.36	19.98	D	N/A	N/A	N/A	N/A	N/A	N/A
chr1	5058015	5058331	317	137	5058152	18	203.69	49.8	D	chr1	5058044	5058335	MLT1J	LTR	MaLR
chr1	5088309	5088823	515	224	5088533	27	221.38	46.43	D	chr1	5088481	5088761	MLT1I	LTR	MaLR
chr1	5621204	5621747	544	274	5621478	29	207.86	39.5	J	N/A	N/A	N/A	N/A	N/A	N/A
chr1	5668862	5669297	436	258	5669120	19	108.66	14.91	D	chr1	5669017	5669180	MLT1I	LTR	MaLR
chr1	5692735	5693173	439	174	5692909	22	156.68	27.48	D	chr1	5692824	5693238	MLT1K	LTR	MaLR
chr1	5704437	5704938	502	232	5704669	84	963.3	96.18	J	chr1	5704488	5704875	MLT1K	LTR	MaLR
chr1	5963112	5963409	298	112	5963224	21	159.55	24.41	J	chr1	5962998	5963237	L2	LINE	L2
chr1	5974740	5975799	1060	474	5975214	404	3100	230.73	K	N/A	N/A	N/A	N/A	N/A	N/A
chr1	6016523	6017127	605	323	6016846	204	3017.58	285.36	Q	N/A	N/A	N/A	N/A	N/A	N/A
chr1	6182035	6182563	529	283	6182318	21	90.01	13.63	B	N/A	N/A	N/A	N/A	N/A	N/A
chr1	6228745	6229172	428	256	6229001	24	157.04	25.76	A	N/A	N/A	N/A	N/A	N/A	N/A
chr1	6242346	6243140	795	445	6242791	133	1406.49	135.96	J	N/A	N/A	N/A	N/A	N/A	N/A
chr1	6250599	6250980	382	132	6250731	20	141.37	23.85	D	chr1	6250613	6250908	L1MB8	LINE	L1
chr1	6376043	6376725	683	378	6376421	46	223.46	21.74	U	N/A	N/A	N/A	N/A	N/A	N/A
chr1	6377698	6378292	595	308	6378006	45	389.25	57.04	B	chr1	6377721	6378940	LTR12E	LTR	ERV1
chr1	6562163	6562831	669	375	6562538	62	369.1	26.59	S	N/A	N/A	N/A	N/A	N/A	N/A
chr1	6607211	6607792	582	257	6607468	32	190.28	18.74	G	N/A	N/A	N/A	N/A	N/A	N/A
chr1	6645066	6645657	592	254	6645320	71	760.8	103.05	M	chr1	6645110	6645667	LTR12	LTR	ERV1
chr1	6668012	6668467	456	311	6668323	33	285.16	36.8	G	chr1	6668055	6668473	MER101	LTR	ERV1
chr1	6719981	6720324	344	115	6720096	48	448.53	53.17	A	N/A	N/A	N/A	N/A	N/A	N/A
chr1	6767158	6768322	1165	643	6767801	637	3100	218.16	K	N/A	N/A	N/A	N/A	N/A	N/A
chr1	7319975	7320516	542	186	7320161	35	319.92	42.15	J	N/A	N/A	N/A	N/A	N/A	N/A
chr1	7686908	7687562	655	409	7687317	130	1733.17	218.51	J	N/A	N/A	N/A	N/A	N/A	N/A
chr1	7693363	7693642	280	180	7693543	14	126.55	28.85	D	chr1	7693272	7693660	MLT1K	LTR	MaLR
chr1	7728453	7728820	368	158	7728611	17	135.45	27.91	A	N/A	N/A	N/A	N/A	N/A	N/A
chr1	7766349	7767237	889	529	7766878	265	3100	171.74	J	N/A	N/A	N/A	N/A	N/A	N/A
chr1	7936549	7937133	585	359	7936908	77	573.73	46.54	T	N/A	N/A	N/A	N/A	N/A	N/A
chr1	8008805	8009465	661	239	8009044	148	1564.42	107.34	A	N/A	N/A	N/A	N/A	N/A	N/A
chr1	8023182	8023531	350	239	8023421	13	98.64	15.82	D	chr1	8023104	8023522	LTR16A	LTR	ERVL
chr1	8087030	8087558	529	317	8087347	30	193.67	31.34	D	N/A	N/A	N/A	N/A	N/A	N/A
chr1	8135926	8136758	833	204	8136130	71	775.51	99.53	A	chr1	8135706	8136459	LTR12	LTR	ERV1
chr1	8298008	8298601	594	333	8298341	30	212.73	33.99	A	N/A	N/A	N/A	N/A	N/A	N/A
chr1	8799957	8800787	831	424	8800381	262	2879.72	121.08	N	N/A	N/A	N/A	N/A	N/A	N/A
chr1	8827940	8828408	469	232	8828172	24	128.13	14.28	J	chr1	8827986	8828384	MLT1K	LTR	MaLR
chr1	8860938	8861957	1020	482	8861420	360	3100	174.11	L	N/A	N/A	N/A	N/A	N/A	N/A
chr1	8881009	8881345	337	115	8881124	17	184.71	49.8	J	chr1	8880953	8881760	LTR12	LTR	ERV1
chr1	9142729	9143233	505	272	9143001	42	441.59	87.59	A	chr1	9142932	9143054	MLT1L	LTR	MaLR
chr1	9411135	9412306	1172	571	9411706	333	3071.29	118.12	T	N/A	N/A	N/A	N/A	N/A	N/A
chr1	9455768	9456089	322	117	9455885	25	241.04	53.86	A	N/A	N/A	N/A	N/A	N/A	N/A
chr1	9521699	9522204	506	236	9521935	37	226.68	20.05	S	N/A	N/A	N/A	N/A	N/A	N/A
chr1	9571012	9571587	576	322	9571334	48	277.62	31.58	S	N/A	N/A	N/A	N/A	N/A	N/A
chr1	9618020	9618421	402	182	9618202	23	148.34	21.9	D	N/A	N/A	N/A	N/A	N/A	N/A
chr1	9685596	9686291	696	365	9685961	86	706.04	67.62	J	chr1	9685907	9686056	MLT1K	LTR	MaLR
chr1	9700077	9700833	757	391	9700468	61	339.62	29.92	K	N/A	N/A	N/A	N/A	N/A	N/A
chr1	9832344	9833326	983	642	9832986	112	1045.85	62.08	J	N/A	N/A	N/A	N/A	N/A	N/A
chr1	9892941	9893768	828	281	9893222	61	369.57	23.61	U	N/A	N/A	N/A	N/A	N/A	N/A
chr1	9925695	9926311	617	401	9926096	119	857.94	51.52	U	N/A	N/A	N/A	N/A	N/A	N/A
chr1	10015195	10015904	710	339	10015534	82	566.19	47.37	S	chr1	10015522	10015544	GC_rich	Low_complexity	Low_complexity
chr1	10028582	10029027	446	216	10028798	21	103.29	16.71	G	chr1	10028547	10028906	MLT1J	LTR	MaLR
chr1	10192462	10193626	1165	618	10193080	467	3100	150.02	S	N/A	N/A	N/A	N/A	N/A	N/A
chr1	10380800	10382605	1806	835	10381635	456	3100	159.55	S	N/A	N/A	N/A	N/A	N/A	N/A
chr1	10454926	10455533	608	327	10455253	41	174.96	19.66	P	N/A	N/A	N/A	N/A	N/A	N/A
chr1	10662224	10662632	409	241	10662465	20	111.01	21.08	A	N/A	N/A	N/A	N/A	N/A	N/A
chr1	10751178	10751598	421	280	10751458	43	458.88	67.68	A	N/A	N/A	N/A	N/A	N/A	N/A
chr1	10780924	10781374	451	232	10781156	16	96.09	15.46	A	N/A	N/A	N/A	N/A	N/A	N/A
chr1	10855755	10856285	531	362	10856117	52	556.04	63.23	A	N/A	N/A	N/A	N/A	N/A	N/A
chr1	10911225	10911747	523	224	10911449	25	170.64	25.76	D	chr1	10911436	10911521	MLT1J	LTR	MaLR
chr1	11035757	11036263	507	258	11036015	45	343.43	41.71	M	N/A	N/A	N/A	N/A	N/A	N/A
chr1	11042388	11043074	687	366	11042754	128	1156.4	82.61	K	N/A	N/A	N/A	N/A	N/A	N/A
chr1	11109176	11109528	353	180	11109356	26	203.57	28.62	M	N/A	N/A	N/A	N/A	N/A	N/A
chr1	11244708	11245745	1038	542	11245250	350	3100	99.82	U	N/A	N/A	N/A	N/A	N/A	N/A
chr1	11301468	11302161	694	369	11301837	86	790.47	75.93	A	N/A	N/A	N/A	N/A	N/A	N/A
chr1	11348157	11348984	828	424	11348581	151	1765.09	147.7	J	chr1	11348553	11348619	MLT1K	LTR	MaLR
chr1	11438613	11439020	408	300	11438913	14	92.47	15.85	A	N/A	N/A	N/A	N/A	N/A	N/A
chr1	11484092	11484505	414	307	11484399	17	128.18	21.83	D	N/A	N/A	N/A	N/A	N/A	N/A
chr1	11573006	11573587	582	285	11573291	29	208.03	44.16	D	chr1	11573191	11573529	MLT1J2	LTR	MaLR
chr1	11786001	11786605	605	415	11786416	40	124.2	12.47	L	N/A	N/A	N/A	N/A	N/A	N/A
chr1	11788436	11789153	718	352	11788788	140	1179.84	54.47	L	N/A	N/A	N/A	N/A	N/A	N/A
chr1	11890193	11890781	589	271	11890464	26	95.97	13.3	S	N/A	N/A	N/A	N/A	N/A	N/A
chr1	11891346	11891916	571	315	11891661	60	375.11	29.55	V	chr1	11891633	11891787	MLT1J	LTR	MaLR
chr1	11931579	11932133	555	363	11931942	99	960.39	55.82	M	chr1	11931594	11931974	MLT1K	LTR	MaLR
chr1	12001712	12002551	840	419	12002131	380	3100	156.67	V	N/A	N/A	N/A	N/A	N/A	N/A
chr1	12034593	12035075	483	279	12034872	55	368.91	30.33	T	N/A	N/A	N/A	N/A	N/A	N/A
chr1	12078251	12079120	870	584	12078835	272	3100	160.7	J	chr1	12078393	12078889	MLT1K	LTR	MaLR
chr1	12394319	12394804	486	282	12394601	29	162.85	20.87	E	chr1	12394223	12394723	MLT1H	LTR	MaLR
chr1	12536350	12537012	663	384	12536734	195	2273.1	133.44	E	chr1	12536555	12537088	MLT1K	LTR	MaLR
chr1	12548484	12548993	510	333	12548817	50	359.97	38.4	J	chr1	12548754	12549044	MLT1I	LTR	MaLR
chr1	13948154	13948781	628	307	13948461	103	1143.54	115.76	S	N/A	N/A	N/A	N/A	N/A	N/A
chr1	14181599	14182129	531	70	14181669	28	281.16	42.14	J	chr1	14181323	14182809	LTR12C	LTR	ERV1
chr1	14566536	14567029	494	231	14566767	17	102.74	19.96	D	N/A	N/A	N/A	N/A	N/A	N/A
chr1	14594765	14595136	372	158	14594923	39	374.16	57.07	D	N/A	N/A	N/A	N/A	N/A	N/A
chr1	14618828	14619565	738	224	14619052	110	1227.93	127.89	B	chr1	14618610	14620168	LTR12C	LTR	ERV1
chr1	14634282	14634737	456	227	14634509	36	230.37	24.77	V	chr1	14634431	14634727	LTR16C	LTR	ERVL
chr1	14760206	14760704	499	373	14760579	56	571.43	80.8	J	N/A	N/A	N/A	N/A	N/A	N/A
chr1	14983107	14983480	374	118	14983225	22	136.25	20.98	U	chr1	14983065	14983461	MLT2C1	LTR	ERVL
chr1	14984094	14984737	644	327	14984421	92	772.59	53.67	U	N/A	N/A	N/A	N/A	N/A	N/A
chr1	15076061	15076790	730	421	15076482	43	228.6	23.7	J	chr1	15076394	15076613	MLT1K	LTR	MaLR
chr1	15096138	15096572	435	228	15096366	66	615.54	45.95	J	chr1	15096180	15096423	MLT1K	LTR	MaLR
chr1	15138956	15139273	318	212	15139168	22	136.22	16.84	M	N/A	N/A	N/A	N/A	N/A	N/A
chr1	15147322	15147884	563	217	15147539	54	459.53	54.38	D	chr1	15147238	15147733	MLT1K	LTR	MaLR
chr1	15169118	15169741	624	286	15169404	59	501.59	65.76	T	chr1	15169333	15169444	MLT1H2	LTR	MaLR
chr1	15323366	15323957	592	303	15323669	77	816.01	100.18	A	N/A	N/A	N/A	N/A	N/A	N/A
chr1	15397190	15397553	364	139	15397329	24	195.99	32.41	D	chr1	15397017	15397490	MLT1J	LTR	MaLR
chr1	15435417	15435856	440	125	15435542	51	546.16	85.21	J	chr1	15435355	15435891	MLT1K	LTR	MaLR
chr1	15478588	15479187	600	256	15478844	102	1091.79	118.79	A	chr1	15478729	15478908	MLT1K	LTR	MaLR
chr1	15485510	15486008	499	243	15485753	26	178.8	30.53	A	chr1	15485704	15485761	MLT1K	LTR	MaLR
chr1	15523574	15524027	454	291	15523865	20	104.25	14.31	D	N/A	N/A	N/A	N/A	N/A	N/A
chr1	15539369	15539959	591	296	15539665	102	1083.86	77.51	J	chr1	15539421	15539777	MLT1H	LTR	MaLR
chr1	15643597	15643959	363	246	15643843	22	147.84	18.03	D	N/A	N/A	N/A	N/A	N/A	N/A
chr1	15656704	15657077	374	237	15656941	65	938.5	183.55	J	N/A	N/A	N/A	N/A	N/A	N/A
chr1	15664652	15665188	537	188	15664840	40	315.91	35.35	J	chr1	15664595	15664938	MLT1K	LTR	MaLR
chr1	15671454	15672215	762	386	15671840	104	1007.39	105.16	J	chr1	15671777	15671979	MLT1K	LTR	MaLR
chr1	15725437	15725970	534	106	15725543	27	104.12	9.94	L	chr1	15725441	15725559	MIR3	SINE	MIR
chr1	15742811	15743079	269	101	15742912	17	124.2	20.13	U	chr1	15742133	15743080	L2	LINE	L2
chr1	15787366	15787918	553	245	15787611	64	808.36	168.56	J	chr1	15787073	15787821	LTR12D	LTR	ERV1
chr1	15802263	15803109	847	495	15802758	158	1590.52	119.44	T	N/A	N/A	N/A	N/A	N/A	N/A
chr1	15816217	15816680	464	311	15816528	17	98.85	16.1	P	N/A	N/A	N/A	N/A	N/A	N/A
chr1	15977055	15977467	413	131	15977186	40	335.5	43.89	D	chr1	15976954	15977216	MLT1K	LTR	MaLR
chr1	16030968	16031395	428	273	16031241	109	1397.39	143.34	P	N/A	N/A	N/A	N/A	N/A	N/A
chr1	16033247	16033834	588	239	16033486	118	1026.28	70.44	K	N/A	N/A	N/A	N/A	N/A	N/A
chr1	16405624	16406343	720	187	16405811	41	178.39	14.7	V	N/A	N/A	N/A	N/A	N/A	N/A
chr1	16415109	16415711	603	328	16415437	38	147.61	17.48	V	N/A	N/A	N/A	N/A	N/A	N/A
chr1	16629528	16630215	688	337	16629865	135	1246.01	84.19	T	chr1	16629740	16630238	MLT1K	LTR	MaLR
chr1	16712652	16713149	498	274	16712926	22	124.36	12.2	F	N/A	N/A	N/A	N/A	N/A	N/A
chr1	17094520	17094914	395	257	17094777	13	121.62	42.14	F	N/A	N/A	N/A	N/A	N/A	N/A
chr1	17103722	17104398	677	196	17103918	67	482.99	42.25	K	N/A	N/A	N/A	N/A	N/A	N/A
chr1	17253064	17253549	486	180	17253244	22	91.34	9.84	B	N/A	N/A	N/A	N/A	N/A	N/A
chr1	17318219	17318940	722	390	17318609	193	2145.21	135.36	J	N/A	N/A	N/A	N/A	N/A	N/A
chr1	17447828	17448613	786	276	17448104	60	438.38	37.96	A	N/A	N/A	N/A	N/A	N/A	N/A
chr1	17481240	17481749	510	308	17481548	22	148.07	27.21	A	N/A	N/A	N/A	N/A	N/A	N/A
chr1	17686983	17687273	291	114	17687097	39	469.99	81.35	V	chr1	17687017	17687234	LTR8A	LTR	ERV1
chr1	17910462	17911102	641	325	17910787	38	393.52	103.05	D	chr1	17910709	17911154	MLT1K	LTR	MaLR
chr1	18106553	18107014	462	253	18106806	17	118	23.23	D	chr1	18106423	18106851	MLT1K	LTR	MaLR
chr1	18123765	18124178	414	113	18123878	17	139.4	22.96	D	chr1	18123849	18124002	MLT1K	LTR	MaLR
chr1	18175842	18176472	631	324	18176166	29	207.23	35.67	D	chr1	18176001	18176347	MLT1J	LTR	MaLR
chr1	18178823	18179299	477	241	18179064	26	222.53	39.1	D	N/A	N/A	N/A	N/A	N/A	N/A
chr1	18209417	18209947	531	268	18209685	77	880.63	111.39	D	chr1	18209474	18209875	MLT1K	LTR	MaLR
chr1	18643724	18644220	497	274	18643998	43	396.16	47.56	J	N/A	N/A	N/A	N/A	N/A	N/A
chr1	18651408	18652062	655	407	18651815	74	624.21	53.98	J	chr1	18651537	18651925	MLT1I	LTR	MaLR
chr1	18657124	18657762	639	269	18657393	52	420.2	43.95	D	chr1	18657098	18657567	MLT1J	LTR	MaLR
chr1	18902275	18902799	525	331	18902606	34	234.52	35.25	A	N/A	N/A	N/A	N/A	N/A	N/A
chr1	19035424	19036336	913	520	19035944	309	3100	360.04	J	chr1	19035576	19036056	MLT1K	LTR	MaLR
chr1	19101510	19102370	861	475	19101985	155	1549.58	93.39	U	N/A	N/A	N/A	N/A	N/A	N/A
chr1	19190678	19191260	583	144	19190822	52	460.92	36.71	J	chr1	19190788	19191079	MLT1K	LTR	MaLR
chr1	19261576	19262347	772	369	19261945	187	2654.38	346.61	J	chr1	19261897	19262001	LTR67	LTR	ERVL
chr1	19684451	19685048	598	293	19684744	35	220.74	31.23	B	N/A	N/A	N/A	N/A	N/A	N/A
chr1	19795584	19796195	612	323	19795907	32	140.38	16.64	S	N/A	N/A	N/A	N/A	N/A	N/A
chr1	19852861	19853274	414	187	19853048	26	166.35	21.33	J	N/A	N/A	N/A	N/A	N/A	N/A
chr1	19858733	19859190	458	287	19859020	42	231.42	20.13	A	N/A	N/A	N/A	N/A	N/A	N/A
chr1	19914474	19915047	574	305	19914779	147	1721	130.03	J	N/A	N/A	N/A	N/A	N/A	N/A
chr1	19976121	19976344	224	113	19976234	12	104.82	25.34	A	chr1	19976191	19976427	MLT1L	LTR	MaLR
chr1	20010528	20010970	443	267	20010795	19	125.61	24.04	D	N/A	N/A	N/A	N/A	N/A	N/A
chr1	20175116	20175543	428	227	20175343	23	147.28	17.63	D	chr1	20175153	20175651	MLT1L	LTR	MaLR
chr1	20182962	20183396	435	144	20183106	46	580.69	123.79	J	chr1	20182780	20184096	LTR12C	LTR	ERV1
chr1	20638411	20638876	466	203	20638614	34	284.27	46.3	D	chr1	20638441	20638662	MLT1K	LTR	MaLR
chr1	20639674	20640345	672	352	20640026	61	390.26	41.91	J	chr1	20639773	20640094	MLT1J	LTR	MaLR
chr1	20718682	20718884	203	102	20718784	36	644	132.49	D	chr1	20718745	20719244	LTR8	LTR	ERV1
chr1	20723015	20723516	502	258	20723273	46	386.01	40.07	A	chr1	20723185	20723315	MLT1L	LTR	MaLR
chr1	20724035	20724360	326	205	20724240	19	137.2	23.51	A	chr1	20723937	20724323	MLT1K	LTR	MaLR
chr1	20768554	20769137	584	270	20768824	63	760.82	143.78	A	chr1	20768693	20769018	MLT1J2	LTR	MaLR
chr1	20802299	20802986	688	351	20802650	63	456.9	58.24	J	chr1	20802306	20802794	MLT1J	LTR	MaLR
chr1	20860099	20861217	1119	594	20860693	315	3100	116.18	B	N/A	N/A	N/A	N/A	N/A	N/A
chr1	20865809	20866404	596	247	20866056	135	1816.3	234.76	J	chr1	20865984	20866148	MLT1K	LTR	MaLR
chr1	20985331	20986273	943	506	20985837	236	2036.95	69.31	K	N/A	N/A	N/A	N/A	N/A	N/A
chr1	21509127	21509626	500	335	21509462	42	393.74	48.79	Q	chr1	21509174	21509654	MLT1K	LTR	MaLR
chr1	21512185	21512481	297	129	21512314	41	449.46	61.83	A	N/A	N/A	N/A	N/A	N/A	N/A
chr1	21544283	21545155	873	407	21544690	229	2625.56	149.51	V	N/A	N/A	N/A	N/A	N/A	N/A
chr1	21580492	21580748	257	107	21580599	18	102.73	13.3	D	chr1	21580473	21580880	LTR67	LTR	ERVL
chr1	21693252	21693730	479	198	21693450	34	284.27	51.12	A	N/A	N/A	N/A	N/A	N/A	N/A
chr1	21695893	21696395	503	318	21696211	21	136.97	22.94	D	N/A	N/A	N/A	N/A	N/A	N/A
chr1	21830869	21831853	985	287	21831156	46	195.24	21.64	V	chr1	21831093	21831217	MIR	SINE	MIR
chr1	21963779	21964062	284	107	21963886	19	161.02	29.2	G	chr1	21963810	21964078	MER21B	LTR	ERV1
chr1	21983029	21983510	482	161	21983190	45	302.95	38.64	N	chr1	21983174	21983472	AluSp	SINE	Alu
chr1	22224020	22224816	797	206	22224226	51	299.98	30.45	S	N/A	N/A	N/A	N/A	N/A	N/A
chr1	22230367	22230773	407	166	22230533	44	343.56	33.55	E	N/A	N/A	N/A	N/A	N/A	N/A
chr1	22247474	22248187	714	384	22247858	142	1049.24	48.72	R	chr1	22247500	22248016	MLT1K	LTR	MaLR
chr1	22251580	22251989	410	155	22251735	25	95.73	13.05	S	N/A	N/A	N/A	N/A	N/A	N/A
chr1	22320443	22321102	660	383	22320826	35	166.98	20.61	T	N/A	N/A	N/A	N/A	N/A	N/A
chr1	22368762	22369325	564	332	22369094	81	834.11	83.35	J	chr1	22368989	22369136	MLT1K	LTR	MaLR
chr1	22378124	22378535	412	205	22378329	18	100.31	15.46	A	chr1	22378224	22378680	MLT1J	LTR	MaLR
chr1	22389871	22390151	281	113	22389984	15	125.89	27.74	A	chr1	22389981	22390367	MLT1K	LTR	MaLR
chr1	22576085	22576479	395	164	22576249	37	392.75	71.3	A	chr1	22576125	22576639	MLT1K	LTR	MaLR
chr1	22583024	22583595	572	275	22583299	59	504.56	44.74	A	chr1	22583234	22583604	MLT1K	LTR	MaLR
chr1	22627550	22628260	711	384	22627934	321	3100	221.02	J	chr1	22627779	22628024	MLT1J	LTR	MaLR
chr1	22650608	22651133	526	237	22650845	148	1822.71	162.3	S	N/A	N/A	N/A	N/A	N/A	N/A
chr1	22799693	22800110	418	124	22799817	19	155.58	35.45	D	N/A	N/A	N/A	N/A	N/A	N/A
chr1	22861450	22861950	501	284	22861734	75	827.3	70.41	J	N/A	N/A	N/A	N/A	N/A	N/A
chr1	22979680	22980112	433	215	22979895	36	276.45	37.35	A	N/A	N/A	N/A	N/A	N/A	N/A
chr1	23072203	23072807	605	334	23072537	54	462.53	63.9	A	chr1	23072273	23072655	MLT1H	LTR	MaLR
chr1	23134394	23135020	627	317	23134711	35	312.47	72.13	J	chr1	23134535	23134979	MER51E	LTR	ERV1
chr1	23218285	23218776	492	108	23218393	23	109.78	11.33	S	N/A	N/A	N/A	N/A	N/A	N/A
chr1	23399923	23400562	640	262	23400185	49	456.07	68.7	A	chr1	23400124	23400230	MLT1K	LTR	MaLR
chr1	23543157	23544097	941	415	23543572	331	3100	113.35	N	N/A	N/A	N/A	N/A	N/A	N/A
chr1	23567093	23568024	932	404	23567497	251	2216.4	89.27	P	N/A	N/A	N/A	N/A	N/A	N/A
chr1	23658349	23658807	459	289	23658638	32	260.67	37.16	D	N/A	N/A	N/A	N/A	N/A	N/A
chr1	23720469	23721190	722	374	23720843	101	913.37	79.63	M	N/A	N/A	N/A	N/A	N/A	N/A
chr1	23729752	23730770	1019	624	23730376	65	358.33	33.6	N	N/A	N/A	N/A	N/A	N/A	N/A
chr1	23747672	23748224	553	319	23747991	32	147.2	18.44	D	N/A	N/A	N/A	N/A	N/A	N/A
chr1	23761220	23761840	621	375	23761595	58	431.74	35.42	E	N/A	N/A	N/A	N/A	N/A	N/A
chr1	23815354	23815926	573	350	23815704	135	1586.38	124.78	A	chr1	23815644	23815861	MLT1K	LTR	MaLR
chr1	23895495	23895893	399	139	23895634	25	146.16	21.59	F	N/A	N/A	N/A	N/A	N/A	N/A
chr1	24067195	24067769	575	221	24067416	73	486.11	38.8	U	N/A	N/A	N/A	N/A	N/A	N/A
chr1	24099057	24099585	529	285	24099342	17	144.2	48.74	J	chr1	24099087	24099512	LTR8	LTR	ERV1
chr1	24392023	24392658	636	297	24392320	52	417.51	55.11	A	chr1	24392280	24392476	MLT1K	LTR	MaLR
chr1	24453746	24454393	648	324	24454070	96	973.26	70.13	J	N/A	N/A	N/A	N/A	N/A	N/A
chr1	24612425	24613288	864	492	24612917	226	2650.76	168.06	P	N/A	N/A	N/A	N/A	N/A	N/A
chr1	24614328	24615363	1036	452	24614780	307	3127.48	115.17	L	N/A	N/A	N/A	N/A	N/A	N/A
chr1	24689329	24690057	729	428	24689757	137	1752.26	214.68	J	chr1	24688910	24690141	LTR12E	LTR	ERV1
chr1	24834208	24834677	470	213	24834421	20	95.38	16.51	A	N/A	N/A	N/A	N/A	N/A	N/A
chr1	24841789	24842459	671	336	24842125	234	2441.25	102.37	S	N/A	N/A	N/A	N/A	N/A	N/A
chr1	24896355	24897170	816	313	24896668	78	776.64	98.44	J	chr1	24896196	24896974	LTR12	LTR	ERV1
chr1	24904255	24904745	491	297	24904552	94	880.27	49.68	T	N/A	N/A	N/A	N/A	N/A	N/A
chr1	24914652	24915104	453	286	24914938	92	1070.25	91.79	J	chr1	24914738	24915007	MLT1K	LTR	MaLR
chr1	24921124	24921626	503	206	24921330	81	1082.82	155.12	J	chr1	24920421	24921824	LTR12C	LTR	ERV1
chr1	24923434	24924142	709	271	24923705	213	2602.39	147.34	J	chr1	24923428	24923834	MLT1L	LTR	MaLR
chr1	25187033	25187722	690	312	25187345	44	352.47	52.27	A	chr1	25187003	25187611	MLT1K	LTR	MaLR
chr1	25206966	25207415	450	281	25207247	18	135.26	31.64	A	N/A	N/A	N/A	N/A	N/A	N/A
chr1	25308486	25309022	537	275	25308761	53	473.57	64.56	D	chr1	25308691	25309128	MLT1L	LTR	MaLR
chr1	25432157	25432772	616	216	25432373	84	862.03	74.58	K	chr1	25431876	25432578	LTR8A	LTR	ERV1
chr1	25628919	25630324	1406	927	25629846	580	3100	155.37	P	N/A	N/A	N/A	N/A	N/A	N/A
chr1	25716923	25717519	597	322	25717245	72	449.72	29.42	J	N/A	N/A	N/A	N/A	N/A	N/A
chr1	25748654	25749293	640	216	25748870	94	649.92	42.27	K	N/A	N/A	N/A	N/A	N/A	N/A
chr1	25785056	25785559	504	324	25785380	38	267.83	30.67	A	N/A	N/A	N/A	N/A	N/A	N/A
chr1	25807462	25807953	492	362	25807824	68	661.28	65.08	A	chr1	25807577	25807932	MLT1I	LTR	MaLR
chr1	25815372	25815859	488	196	25815568	38	296.92	37.21	A	N/A	N/A	N/A	N/A	N/A	N/A
chr1	25914790	25915520	731	412	25915202	162	1794.25	137.39	J	chr1	25914877	25915360	MLT1J	LTR	MaLR
chr1	26105409	26105848	440	150	26105559	73	692.46	61.18	B	N/A	N/A	N/A	N/A	N/A	N/A
chr1	26233805	26235311	1507	774	26234579	337	2948.82	102.81	V	N/A	N/A	N/A	N/A	N/A	N/A
chr1	26265854	26266424	571	244	26266098	23	96.93	16.49	R	N/A	N/A	N/A	N/A	N/A	N/A
chr1	26310661	26311538	878	654	26311315	114	763.76	54.38	K	N/A	N/A	N/A	N/A	N/A	N/A
chr1	26325409	26325984	576	210	26325619	160	1779.7	92	L	N/A	N/A	N/A	N/A	N/A	N/A
chr1	26368829	26369069	241	120	26368949	23	143.88	15.46	V	N/A	N/A	N/A	N/A	N/A	N/A
chr1	26399977	26400749	773	331	26400308	54	241.58	12.8	T	N/A	N/A	N/A	N/A	N/A	N/A
chr1	26432744	26433504	761	393	26433137	203	1850.4	66.34	P	N/A	N/A	N/A	N/A	N/A	N/A
chr1	26478663	26479453	791	407	26479070	115	923.61	68.4	L	N/A	N/A	N/A	N/A	N/A	N/A
chr1	26505143	26506107	965	599	26505742	260	2567.8	143.64	V	N/A	N/A	N/A	N/A	N/A	N/A
chr1	26550530	26550951	422	213	26550743	37	240.81	23.92	T	N/A	N/A	N/A	N/A	N/A	N/A
chr1	26609105	26609666	562	299	26609404	16	93.14	22.49	D	N/A	N/A	N/A	N/A	N/A	N/A
chr1	26670911	26672304	1394	601	26671512	209	1733.84	124.04	S	N/A	N/A	N/A	N/A	N/A	N/A
chr1	26676624	26677142	519	317	26676941	63	551.25	54.7	E	chr1	26676839	26676971	MLT1L	LTR	MaLR
chr1	26728722	26729156	435	115	26728837	35	227.17	27.74	S	N/A	N/A	N/A	N/A	N/A	N/A
chr1	26782992	26783625	634	311	26783303	41	175.64	16.33	D	N/A	N/A	N/A	N/A	N/A	N/A
chr1	26820291	26821158	868	316	26820607	84	581.61	53.58	B	N/A	N/A	N/A	N/A	N/A	N/A
chr1	26891828	26892493	666	179	26892007	43	146.69	10.64	P	N/A	N/A	N/A	N/A	N/A	N/A
chr1	26897012	26897697	686	339	26897351	69	400.97	31.49	L	N/A	N/A	N/A	N/A	N/A	N/A
chr1	27063734	27064791	1058	534	27064268	316	3100	123.98	V	N/A	N/A	N/A	N/A	N/A	N/A
chr1	27120227	27121073	847	476	27120703	218	2100.23	103.8	S	N/A	N/A	N/A	N/A	N/A	N/A
chr1	27211597	27212526	930	561	27212158	374	3100	126.5	V	N/A	N/A	N/A	N/A	N/A	N/A
chr1	27225996	27226419	424	255	27226251	27	129.3	13.27	V	chr1	27226057	27226907	L2	LINE	L2
chr1	27251513	27252149	637	337	27251850	144	1800.4	147.21	D	N/A	N/A	N/A	N/A	N/A	N/A
chr1	27256371	27256798	428	252	27256623	32	279	49.54	J	chr1	27256565	27256786	MLT1L	LTR	MaLR
chr1	27284943	27285457	515	217	27285160	28	199.11	33.03	D	chr1	27285007	27285565	MLT1E1	LTR	MaLR
chr1	27433077	27433822	746	422	27433499	175	1667.77	83.72	S	N/A	N/A	N/A	N/A	N/A	N/A
chr1	27521074	27521525	452	149	27521223	31	138.59	17.47	S	N/A	N/A	N/A	N/A	N/A	N/A
chr1	27590612	27592325	1714	1030	27591642	202	1175.7	65.39	V	N/A	N/A	N/A	N/A	N/A	N/A
chr1	27688639	27689981	1343	644	27689283	434	3100	88.39	B	N/A	N/A	N/A	N/A	N/A	N/A
chr1	27767440	27767907	468	273	27767713	30	145.18	17.17	G	N/A	N/A	N/A	N/A	N/A	N/A
chr1	27799486	27799994	509	203	27799689	79	739.38	73.92	G	N/A	N/A	N/A	N/A	N/A	N/A
chr1	27858915	27859563	649	340	27859255	78	532.51	51.52	T	N/A	N/A	N/A	N/A	N/A	N/A
chr1	27871047	27871731	685	273	27871320	90	622.04	45.63	T	N/A	N/A	N/A	N/A	N/A	N/A
chr1	27924555	27925320	766	405	27924960	128	1098.64	57.74	V	N/A	N/A	N/A	N/A	N/A	N/A
chr1	27989345	27989864	520	321	27989666	39	378.66	65.57	M	chr1	27989268	27989707	LTR12B	LTR	ERV1
chr1	28113248	28114512	1265	476	28113724	426	3100	115.93	B	N/A	N/A	N/A	N/A	N/A	N/A
chr1	28304129	28304724	596	260	28304389	53	287.12	26.48	T	N/A	N/A	N/A	N/A	N/A	N/A
chr1	28311789	28312139	351	236	28312025	27	112.68	13.7	T	N/A	N/A	N/A	N/A	N/A	N/A
chr1	28434630	28435761	1132	494	28435124	531	3100	132.67	L	N/A	N/A	N/A	N/A	N/A	N/A
chr1	28446099	28446861	763	354	28446453	321	3100	185.7	S	N/A	N/A	N/A	N/A	N/A	N/A
chr1	28458102	28459117	1016	352	28458454	151	996.89	50.27	P	N/A	N/A	N/A	N/A	N/A	N/A
chr1	28498779	28499327	549	406	28499185	31	206.49	31.43	D	chr1	28499106	28499246	MLT1L	LTR	MaLR
chr1	28521404	28521732	329	118	28521522	12	98.27	25.76	D	N/A	N/A	N/A	N/A	N/A	N/A
chr1	28864181	28864418	238	141	28864322	12	101.48	19.82	R	chr1	28864182	28864411	L2	LINE	L2
chr1	28868795	28869252	458	312	28869107	25	128.29	17.7	U	N/A	N/A	N/A	N/A	N/A	N/A
chr1	29052151	29052591	441	206	29052357	44	409.11	58.43	A	chr1	29052244	29052477	MLT1J2	LTR	MaLR
chr1	29085594	29086559	966	570	29086164	259	2529.2	128.2	L	N/A	N/A	N/A	N/A	N/A	N/A
chr1	29113153	29113873	721	387	29113540	114	939.21	64.4	S	chr1	29113536	29113557	GC_rich	Low_complexity	Low_complexity
chr1	29125978	29126274	297	118	29126096	17	91.17	13.8	K	N/A	N/A	N/A	N/A	N/A	N/A
chr1	29329564	29329895	332	222	29329786	67	917.35	154.57	J	chr1	29329343	29330741	LTR12C	LTR	ERV1
chr1	29548780	29549807	1028	550	29549330	251	2455.63	122.16	T	chr1	29549220	29549431	MLT1K	LTR	MaLR
chr1	29555670	29556341	672	339	29556009	72	606.7	57.96	J	N/A	N/A	N/A	N/A	N/A	N/A
chr1	29564056	29564297	242	116	29564172	11	91.84	20.78	D	N/A	N/A	N/A	N/A	N/A	N/A
chr1	29712384	29713095	712	260	29712644	234	3100	264.94	J	chr1	29712486	29712853	MLT1K	LTR	MaLR
chr1	29739886	29740467	582	374	29740260	127	1717.14	235.78	J	chr1	29740180	29740368	MLT1K	LTR	MaLR
chr1	29847649	29848001	353	166	29847815	13	90.92	17.83	D	chr1	29847774	29847837	MLT1L	LTR	MaLR
chr1	29895105	29895512	408	197	29895302	36	339.26	53.36	J	chr1	29895178	29895345	MLT1K	LTR	MaLR
chr1	29919605	29920150	546	241	29919846	44	475.37	91.6	D	chr1	29919735	29920009	MLT1K	LTR	MaLR
chr1	29984554	29985071	518	303	29984857	90	1186.05	153.58	J	N/A	N/A	N/A	N/A	N/A	N/A
chr1	30055639	30055958	320	210	30055849	18	178.15	33.6	D	N/A	N/A	N/A	N/A	N/A	N/A
chr1	30109940	30110565	626	273	30110213	84	1029.71	177.75	J	N/A	N/A	N/A	N/A	N/A	N/A
chr1	30228738	30229289	552	248	30228986	23	166.61	34.35	D	chr1	30228901	30229044	MLT1L	LTR	MaLR
chr1	30235466	30235959	494	194	30235660	26	255.98	48.3	D	N/A	N/A	N/A	N/A	N/A	N/A
chr1	30236552	30236905	354	127	30236679	28	323.32	74.06	D	N/A	N/A	N/A	N/A	N/A	N/A
chr1	30362912	30363762	851	416	30363328	170	1841.91	157.14	J	chr1	30363136	30363558	MLT1K	LTR	MaLR
chr1	30380991	30381556	566	312	30381303	32	162.41	21.39	J	chr1	30381282	30381472	MLT1J1	LTR	MaLR
chr1	30432807	30433393	587	294	30433101	46	287.64	33.69	E	chr1	30433004	30433392	LTR67	LTR	ERVL
chr1	30698379	30698718	340	198	30698577	13	107.59	25.76	D	chr1	30698526	30698704	MLT1J	LTR	MaLR
chr1	30716593	30717112	520	294	30716887	21	119.77	17.86	D	chr1	30716777	30716919	MLT1K	LTR	MaLR
chr1	30930688	30931305	618	320	30931008	61	540.59	77.28	J	N/A	N/A	N/A	N/A	N/A	N/A
chr1	31004026	31004942	917	366	31004392	318	3100	108.35	K	N/A	N/A	N/A	N/A	N/A	N/A
chr1	31014338	31015004	667	342	31014680	65	350.7	29.06	N	N/A	N/A	N/A	N/A	N/A	N/A
chr1	31023456	31024499	1044	583	31024039	366	3100	86.56	V	chr1	31023919	31024274	MLT1K	LTR	MaLR
chr1	31069385	31070337	953	646	31070031	196	1732.47	87.43	T	N/A	N/A	N/A	N/A	N/A	N/A
chr1	31099005	31100039	1035	715	31099720	128	863.77	65.57	T	chr1	31099431	31099868	MLT1J	LTR	MaLR
chr1	31117488	31118538	1051	862	31118350	62	197.22	14.48	T	N/A	N/A	N/A	N/A	N/A	N/A
chr1	31148893	31149330	438	146	31149039	19	100.79	18.4	G	N/A	N/A	N/A	N/A	N/A	N/A
chr1	31397734	31398255	522	245	31397979	39	370.75	67.24	R	chr1	31397916	31398178	MLT1K	LTR	MaLR
chr1	31416069	31416596	528	135	31416204	27	94.02	8.16	T	chr1	31416185	31416325	MIR3	SINE	MIR
chr1	31541931	31542778	848	402	31542333	174	1457.05	63.36	K	N/A	N/A	N/A	N/A	N/A	N/A
chr1	31882521	31883567	1047	615	31883136	257	1857.33	78.17	B	N/A	N/A	N/A	N/A	N/A	N/A
chr1	31980958	31981498	541	342	31981300	80	796.41	80	A	N/A	N/A	N/A	N/A	N/A	N/A
chr1	32068182	32068794	613	308	32068490	35	209.08	29.44	E	N/A	N/A	N/A	N/A	N/A	N/A
chr1	32166993	32167300	308	110	32167103	23	176.08	29.09	L	N/A	N/A	N/A	N/A	N/A	N/A
chr1	32176397	32177034	638	222	32176619	83	591.74	37.47	L	chr1	32176564	32176624	GC_rich	Low_complexity	Low_complexity
chr1	32345863	32346338	476	285	32346148	28	145.27	19.81	S	N/A	N/A	N/A	N/A	N/A	N/A
chr1	32417400	32418443	1044	436	32417836	222	1962.06	89.41	S	N/A	N/A	N/A	N/A	N/A	N/A
chr1	32529665	32530688	1024	517	32530182	324	3167.56	115.28	S	N/A	N/A	N/A	N/A	N/A	N/A
chr1	32574371	32574833	463	127	32574498	66	699.22	91.77	B	N/A	N/A	N/A	N/A	N/A	N/A
chr1	32632369	32633133	765	371	32632740	106	627.23	23.57	N	N/A	N/A	N/A	N/A	N/A	N/A
chr1	32702873	32703416	544	321	32703194	52	538.9	88.83	A	N/A	N/A	N/A	N/A	N/A	N/A
chr1	32721019	32721392	374	168	32721187	19	166.87	38.88	A	N/A	N/A	N/A	N/A	N/A	N/A
chr1	32723134	32723514	381	225	32723359	15	101.81	18.4	A	N/A	N/A	N/A	N/A	N/A	N/A
chr1	32850189	32850733	545	341	32850530	61	682.53	112.32	D	N/A	N/A	N/A	N/A	N/A	N/A
chr1	32856829	32857457	629	208	32857037	60	628.07	85.65	J	N/A	N/A	N/A	N/A	N/A	N/A
chr1	32888901	32889701	801	396	32889297	193	1966.15	110.41	K	N/A	N/A	N/A	N/A	N/A	N/A
chr1	32991845	32992420	576	259	32992104	61	432.16	41.7	P	N/A	N/A	N/A	N/A	N/A	N/A
chr1	33055452	33055871	420	255	33055707	31	146.78	14.24	L	N/A	N/A	N/A	N/A	N/A	N/A
chr1	33274223	33275655	1433	947	33275170	459	3100	250.89	B	N/A	N/A	N/A	N/A	N/A	N/A
chr1	33283391	33283738	348	191	33283582	41	327.47	29.88	D	N/A	N/A	N/A	N/A	N/A	N/A
chr1	33318958	33319600	643	288	33319246	67	424.96	33.92	T	N/A	N/A	N/A	N/A	N/A	N/A
chr1	33365260	33365826	567	338	33365598	40	223.12	21.91	T	N/A	N/A	N/A	N/A	N/A	N/A
chr1	33475786	33476151	366	176	33475962	16	94.31	13.56	A	chr1	33475849	33475983	MLT1J2	LTR	MaLR
chr1	33476404	33477074	671	296	33476700	118	1523.73	215.46	J	chr1	33476641	33476738	MLT1K	LTR	MaLR
chr1	33489812	33490293	482	335	33490147	46	465.38	76.57	J	chr1	33490104	33490258	MLT1I	LTR	MaLR
chr1	33540512	33541115	604	302	33540814	87	1008.27	139.54	A	N/A	N/A	N/A	N/A	N/A	N/A
chr1	33630808	33631254	447	256	33631064	61	642.41	90.48	J	N/A	N/A	N/A	N/A	N/A	N/A
chr1	33669084	33669675	592	253	33669337	69	653.46	80.31	T	N/A	N/A	N/A	N/A	N/A	N/A
chr1	33676554	33676917	364	178	33676732	39	446.09	76.06	A	N/A	N/A	N/A	N/A	N/A	N/A
chr1	33710140	33711100	961	495	33710635	264	2780.64	126.44	T	N/A	N/A	N/A	N/A	N/A	N/A
chr1	33739992	33740394	403	223	33740215	21	141.08	22.25	J	N/A	N/A	N/A	N/A	N/A	N/A
chr1	33757301	33757860	560	269	33757570	37	320.58	51.52	A	N/A	N/A	N/A	N/A	N/A	N/A
chr1	34473896	34474151	256	117	34474013	18	202.06	51.52	D	chr1	34473795	34474048	MLT1K	LTR	MaLR
chr1	34716778	34717017	240	109	34716887	16	157.56	33.9	D	chr1	34716809	34717145	MLT1I	LTR	MaLR
chr1	35097703	35098383	681	294	35097997	112	990.16	72.51	B	N/A	N/A	N/A	N/A	N/A	N/A
chr1	35100139	35100485	347	114	35100253	15	96.66	20.05	E	chr1	35100238	35100483	L2	LINE	L2
chr1	35119475	35119775	301	96	35119571	14	106.02	20.24	A	chr1	35119415	35119876	MLT1J	LTR	MaLR
chr1	35430969	35432023	1055	505	35431474	417	3100	129.48	N	N/A	N/A	N/A	N/A	N/A	N/A
chr1	35795452	35796345	894	438	35795890	303	2902.06	100.18	B	N/A	N/A	N/A	N/A	N/A	N/A
chr1	36007932	36008560	629	332	36008264	107	743.01	37.04	B	N/A	N/A	N/A	N/A	N/A	N/A
chr1	36107750	36108253	504	155	36107905	71	627.91	56.26	S	N/A	N/A	N/A	N/A	N/A	N/A
chr1	36372931	36373679	749	439	36373370	52	304.3	30.01	T	N/A	N/A	N/A	N/A	N/A	N/A
chr1	36388813	36389391	579	348	36389161	41	174.6	13.52	B	N/A	N/A	N/A	N/A	N/A	N/A
chr1	36462078	36463286	1209	1004	36463082	82	259.94	18.64	K	N/A	N/A	N/A	N/A	N/A	N/A
chr1	36537887	36538379	493	294	36538181	35	143.72	16.33	M	N/A	N/A	N/A	N/A	N/A	N/A
chr1	36544920	36545629	710	287	36545207	188	2069.48	113.81	T	N/A	N/A	N/A	N/A	N/A	N/A
chr1	36623897	36624962	1066	427	36624324	295	2752.92	95.12	K	N/A	N/A	N/A	N/A	N/A	N/A
chr1	36635812	36636392	581	335	36636147	44	270	32.7	U	N/A	N/A	N/A	N/A	N/A	N/A
chr1	36639515	36640015	501	261	36639776	29	177.97	19.63	E	chr1	36638738	36640500	MER52A	LTR	ERV1
chr1	36650041	36650544	504	190	36650231	23	111.25	21.47	T	chr1	36649991	36650445	MER51A	LTR	ERV1
chr1	36688496	36688905	410	228	36688724	17	107.81	12.96	D	N/A	N/A	N/A	N/A	N/A	N/A
chr1	36702247	36702926	680	303	36702550	40	140.59	13.19	U	N/A	N/A	N/A	N/A	N/A	N/A
chr1	36751995	36752717	723	351	36752346	71	567.25	54.3	T	N/A	N/A	N/A	N/A	N/A	N/A
chr1	36755475	36756026	552	329	36755804	28	151.69	20.89	T	N/A	N/A	N/A	N/A	N/A	N/A
chr1	36981930	36982474	545	288	36982218	18	102.43	15.79	D	N/A	N/A	N/A	N/A	N/A	N/A
chr1	36988966	36989323	358	249	36989215	43	372.03	40.35	D	chr1	36989055	36989262	MLT1H	LTR	MaLR
chr1	37103419	37103969	551	224	37103643	49	427.69	70.84	D	N/A	N/A	N/A	N/A	N/A	N/A
chr1	37338464	37338996	533	228	37338692	28	212.71	42.29	D	chr1	37338614	37338838	MLT1H	LTR	MaLR
chr1	37397342	37397710	369	143	37397485	23	148.81	21.39	J	chr1	37397146	37397602	LTR67	LTR	ERVL
chr1	37430437	37430820	384	228	37430665	19	178.11	45.8	D	chr1	37430511	37431056	MLT1K	LTR	MaLR
chr1	37513367	37513811	445	306	37513673	50	529.29	93.14	J	N/A	N/A	N/A	N/A	N/A	N/A
chr1	37648120	37648830	711	351	37648471	101	1082.51	132.24	D	N/A	N/A	N/A	N/A	N/A	N/A
chr1	37661920	37662680	761	260	37662180	78	693.61	68.19	T	N/A	N/A	N/A	N/A	N/A	N/A
chr1	37757105	37757352	248	118	37757223	61	931.97	164.43	E	chr1	37756256	37757747	LTR12C	LTR	ERV1
chr1	37798905	37799351	447	289	37799194	20	104.03	21.08	E	N/A	N/A	N/A	N/A	N/A	N/A
chr1	37928535	37929354	820	422	37928957	247	2396.09	99.02	K	N/A	N/A	N/A	N/A	N/A	N/A
chr1	37930369	37931140	772	319	37930688	196	1856.7	68.5	N	N/A	N/A	N/A	N/A	N/A	N/A
chr1	38003180	38003652	473	325	38003505	47	443.22	61.01	A	N/A	N/A	N/A	N/A	N/A	N/A
chr1	38097418	38098495	1078	509	38097927	304	2926.61	123.93	B	N/A	N/A	N/A	N/A	N/A	N/A
chr1	38169707	38170606	900	477	38170184	249	2440.05	96.42	B	N/A	N/A	N/A	N/A	N/A	N/A
chr1	38250520	38251342	823	434	38250954	138	828.22	30.91	L	N/A	N/A	N/A	N/A	N/A	N/A
chr1	38284822	38285746	925	444	38285266	164	2011.22	166.33	J	N/A	N/A	N/A	N/A	N/A	N/A
chr1	38485396	38486034	639	289	38485685	47	381.46	51.86	A	N/A	N/A	N/A	N/A	N/A	N/A
chr1	38509788	38510315	528	243	38510031	19	127.4	27.23	D	N/A	N/A	N/A	N/A	N/A	N/A
chr1	38779417	38779744	328	151	38779568	14	96.86	13.74	D	chr1	38779561	38780083	L3	LINE	CR1
chr1	38822685	38822965	281	172	38822857	17	111.51	16.39	D	chr1	38822818	38822963	MLT1K	LTR	MaLR
chr1	38983045	38983407	363	172	38983217	31	216.88	29.09	T	chr1	38983174	38983228	MLT1K	LTR	MaLR
chr1	38983972	38984537	566	242	38984214	77	555.17	46.22	T	chr1	38984173	38984254	MLT1K	LTR	MaLR
chr1	39015845	39016473	629	310	39016155	31	139.43	18.11	D	N/A	N/A	N/A	N/A	N/A	N/A
chr1	39097747	39098404	658	342	39098089	144	1508.98	110.56	U	N/A	N/A	N/A	N/A	N/A	N/A
chr1	39112644	39113128	485	249	39112893	31	166.02	23.78	B	N/A	N/A	N/A	N/A	N/A	N/A
chr1	39164157	39164687	531	263	39164420	48	498.76	81.97	D	N/A	N/A	N/A	N/A	N/A	N/A
chr1	39191666	39192099	434	185	39191851	24	261.21	68.95	T	chr1	39191348	39192031	LTR8	LTR	ERV1
chr1	39229267	39229678	412	215	39229482	26	155.36	22.29	S	N/A	N/A	N/A	N/A	N/A	N/A
chr1	39623663	39624356	694	359	39624022	46	207.32	17.13	R	N/A	N/A	N/A	N/A	N/A	N/A
chr1	39729342	39730169	828	461	39729803	114	1400.05	190.63	Q	chr1	39729785	39729827	GC_rich	Low_complexity	Low_complexity
chr1	39839889	39840375	487	285	39840174	22	221.96	57.46	J	chr1	39839862	39840265	LTR12B	LTR	ERV1
chr1	39841976	39842364	389	118	39842094	51	718.51	141.73	J	chr1	39842002	39842477	LTR12B	LTR	ERV1
chr1	39849170	39850081	912	214	39849384	54	489.17	61.6	J	chr1	39848906	39850104	LTR12D	LTR	ERV1
chr1	39853324	39853664	341	114	39853438	13	97.24	25.76	D	chr1	39853393	39853605	L1ME1	LINE	L1
chr1	39901729	39902305	577	276	39902005	66	655.69	84.15	J	N/A	N/A	N/A	N/A	N/A	N/A
chr1	39915820	39916394	575	323	39916143	162	2122.44	161.4	J	N/A	N/A	N/A	N/A	N/A	N/A
chr1	39929481	39930081	601	278	39929759	72	655.54	77.28	A	N/A	N/A	N/A	N/A	N/A	N/A
chr1	39949482	39950052	571	218	39949700	69	520.8	45.97	T	N/A	N/A	N/A	N/A	N/A	N/A
chr1	40026905	40027490	586	237	40027142	75	679.1	56.61	T	N/A	N/A	N/A	N/A	N/A	N/A
chr1	40083916	40084249	334	156	40084072	22	119.39	15.46	M	N/A	N/A	N/A	N/A	N/A	N/A
chr1	40136718	40137891	1174	646	40137364	595	3100	158.36	P	N/A	N/A	N/A	N/A	N/A	N/A
chr1	40193030	40193551	522	284	40193314	23	150.81	24.04	A	N/A	N/A	N/A	N/A	N/A	N/A
chr1	40226992	40227192	201	101	40227093	10	103.35	25.89	D	chr1	40226912	40227547	MER20B	DNA	MER1_type
chr1	40242625	40242910	286	150	40242775	18	174.38	33.39	D	chr1	40242709	40242873	ERVL-E	LTR	ERVL
chr1	40278646	40279032	387	273	40278919	23	101.42	9.57	K	N/A	N/A	N/A	N/A	N/A	N/A
chr1	40611489	40612070	582	412	40611901	41	265.87	33.12	P	N/A	N/A	N/A	N/A	N/A	N/A
chr1	40626677	40627058	382	273	40626950	18	111.42	16.71	E	chr1	40625930	40627414	LTR12C	LTR	ERV1
chr1	40676754	40677008	255	123	40676877	27	234.33	30.67	D	chr1	40676630	40676919	LTR16C	LTR	ERVL
chr1	40795853	40796344	492	305	40796158	53	700.33	172.37	J	chr1	40795695	40797594	LTR12C	LTR	ERV1
chr1	40917643	40918216	574	328	40917971	38	271.56	41.5	D	chr1	40917902	40918013	MLT1K	LTR	MaLR
chr1	40929581	40930948	1368	809	40930390	233	1845.5	85.62	K	N/A	N/A	N/A	N/A	N/A	N/A
chr1	40946979	40947996	1018	554	40947533	563	3100	175.03	P	N/A	N/A	N/A	N/A	N/A	N/A
chr1	41044930	41045278	349	247	41045177	20	120.39	12.36	E	N/A	N/A	N/A	N/A	N/A	N/A
chr1	41049226	41049761	536	231	41049457	51	315.82	33.3	D	N/A	N/A	N/A	N/A	N/A	N/A
chr1	41100314	41101166	853	377	41100691	170	1527.96	93.9	V	N/A	N/A	N/A	N/A	N/A	N/A
chr1	41217682	41218871	1190	542	41218224	286	2971.62	155.56	S	N/A	N/A	N/A	N/A	N/A	N/A
chr1	41241879	41242595	717	376	41242255	79	436.85	21.47	M	chr1	41241995	41242419	MLT1H2	LTR	MaLR
chr1	41503599	41504215	617	295	41503894	29	192.95	29.2	A	chr1	41503802	41503911	MIR3	SINE	MIR
chr1	41571494	41572160	667	310	41571804	80	805.7	104.81	J	chr1	41571594	41571883	MLT1K	LTR	MaLR
chr1	41599010	41599793	784	430	41599440	156	1597.91	92.96	T	N/A	N/A	N/A	N/A	N/A	N/A
chr1	41635021	41635659	639	406	41635427	93	888.8	70.91	J	chr1	41635412	41635491	MLT1K	LTR	MaLR
chr1	41640211	41640484	274	166	41640377	15	127.52	25.76	D	N/A	N/A	N/A	N/A	N/A	N/A
chr1	41700863	41701149	287	178	41701041	29	295.05	49.91	D	chr1	41700658	41701117	MLT1K	LTR	MaLR
chr1	41914981	41915269	289	124	41915105	19	186.51	38.16	D	chr1	41914888	41915386	MLT1K	LTR	MaLR
chr1	42158182	42158758	577	316	42158498	37	277.98	38.64	A	N/A	N/A	N/A	N/A	N/A	N/A
chr1	42401251	42401879	629	394	42401645	56	528.54	59.29	A	N/A	N/A	N/A	N/A	N/A	N/A
chr1	42608392	42608907	516	298	42608690	47	490.4	77.28	D	chr1	42608511	42609021	MLT1J	LTR	MaLR
chr1	42618852	42619155	304	139	42618991	52	680.95	103.05	D	N/A	N/A	N/A	N/A	N/A	N/A
chr1	42920125	42920767	643	482	42920607	214	2329.51	93.08	P	N/A	N/A	N/A	N/A	N/A	N/A
chr1	43084201	43085237	1037	532	43084733	393	3100	213.93	K	N/A	N/A	N/A	N/A	N/A	N/A
chr1	43154556	43155207	652	117	43154673	54	579.82	74.89	J	chr1	43154366	43155802	LTR12C	LTR	ERV1
chr1	43162207	43163116	910	380	43162587	280	2865.06	112.61	K	N/A	N/A	N/A	N/A	N/A	N/A
chr1	43196173	43196845	673	308	43196481	63	447.43	43.29	L	N/A	N/A	N/A	N/A	N/A	N/A
chr1	43196952	43197484	533	218	43197170	24	97.22	13.32	L	N/A	N/A	N/A	N/A	N/A	N/A
chr1	43463342	43463848	507	299	43463641	30	193.67	27.43	A	chr1	43463555	43463773	MER58A	DNA	MER1_type
chr1	43596752	43597494	743	421	43597173	300	3100	268.35	S	N/A	N/A	N/A	N/A	N/A	N/A
chr1	43606002	43606713	712	318	43606320	62	406.78	41.61	B	chr1	43606300	43606327	GC_rich	Low_complexity	Low_complexity
chr1	43627750	43628468	719	342	43628092	79	483.53	37.21	K	N/A	N/A	N/A	N/A	N/A	N/A
chr1	43692621	43693293	673	345	43692966	63	488.4	53.25	J	N/A	N/A	N/A	N/A	N/A	N/A
chr1	43749625	43750099	475	288	43749913	48	472.28	69.92	A	chr1	43749700	43750146	MLT1K	LTR	MaLR
chr1	43783919	43784498	580	304	43784223	46	393.27	56.67	D	N/A	N/A	N/A	N/A	N/A	N/A
chr1	43887798	43889174	1377	492	43888290	452	3100	101.06	S	N/A	N/A	N/A	N/A	N/A	N/A
chr1	43945203	43946149	947	475	43945678	223	2012.21	85.16	K	N/A	N/A	N/A	N/A	N/A	N/A
chr1	44207766	44208622	857	378	44208144	256	2649.6	114.33	V	N/A	N/A	N/A	N/A	N/A	N/A
chr1	44476067	44476960	894	508	44476575	93	684.81	55.82	J	N/A	N/A	N/A	N/A	N/A	N/A
chr1	44593202	44593920	719	405	44593607	203	2087.91	99.82	B	N/A	N/A	N/A	N/A	N/A	N/A
chr1	44609452	44609925	474	200	44609652	18	106.28	24.15	A	chr1	44609397	44610260	HERVL	LTR	ERVL
chr1	44727827	44728214	388	197	44728024	21	103.29	15.45	D	chr1	44727878	44728101	MLT1K	LTR	MaLR
chr1	44912300	44913370	1071	600	44912900	317	2827.55	83.44	U	N/A	N/A	N/A	N/A	N/A	N/A
chr1	44941370	44941693	324	220	44941590	15	120.04	18.78	A	N/A	N/A	N/A	N/A	N/A	N/A
chr1	45029810	45030129	320	205	45030015	17	114.92	18.2	T	N/A	N/A	N/A	N/A	N/A	N/A
chr1	45031761	45032284	524	315	45032076	37	165.21	17.55	T	chr1	45031803	45032178	L2	LINE	L2
chr1	45081243	45081842	600	300	45081543	78	702.19	63.79	T	N/A	N/A	N/A	N/A	N/A	N/A
chr1	45435058	45435511	454	259	45435317	26	136.7	13.64	J	chr1	45435117	45435560	MER101	LTR	ERV1
chr1	45577668	45578078	411	214	45577882	17	93.31	14.46	S	chr1	45577827	45577953	L2	LINE	L2
chr1	45578117	45578764	648	223	45578340	79	608.45	45.58	K	N/A	N/A	N/A	N/A	N/A	N/A
chr1	45619494	45619935	442	165	45619659	55	527.65	64.4	J	chr1	45619517	45619998	MLT1H	LTR	MaLR
chr1	45729193	45729959	767	393	45729586	109	706.41	36.43	U	N/A	N/A	N/A	N/A	N/A	N/A
chr1	45821378	45822145	768	391	45821769	110	653.71	34.76	P	N/A	N/A	N/A	N/A	N/A	N/A
chr1	45925314	45925855	542	203	45925517	34	123.8	13.78	L	N/A	N/A	N/A	N/A	N/A	N/A
chr1	45999890	46000242	353	104	45999994	16	116.07	20.01	D	chr1	45999970	46000460	HERVIP10F	LTR	ERV1
chr1	46303670	46304115	446	130	46303800	59	579.53	68.7	J	chr1	46303664	46304136	MLT1J	LTR	MaLR
chr1	46370580	46372100	1521	793	46371373	408	3100	143.02	B	N/A	N/A	N/A	N/A	N/A	N/A
chr1	46386567	46387005	439	196	46386763	45	321.4	26.39	J	chr1	46386489	46386937	MLT1K	LTR	MaLR
chr1	46421873	46422341	469	203	46422076	39	256.1	27.74	D	N/A	N/A	N/A	N/A	N/A	N/A
chr1	46485554	46486380	827	397	46485951	299	3100	168.37	S	N/A	N/A	N/A	N/A	N/A	N/A
chr1	46608475	46609049	575	304	46608779	50	376.31	50.61	T	chr1	46608655	46608802	MLT1I	LTR	MaLR
chr1	46676055	46676512	458	150	46676205	29	100.53	12.39	T	chr1	46676123	46676299	MIRb	SINE	MIR
chr1	46727621	46728503	883	409	46728030	159	1505.99	112.32	T	chr1	46728028	46728056	GC_rich	Low_complexity	Low_complexity
chr1	46957017	46957733	717	424	46957441	100	750.5	59.83	B	N/A	N/A	N/A	N/A	N/A	N/A
chr1	47419000	47420046	1047	380	47419380	77	295.08	20.24	K	N/A	N/A	N/A	N/A	N/A	N/A
chr1	47467125	47467992	868	129	47467254	40	130.37	11.71	L	N/A	N/A	N/A	N/A	N/A	N/A
chr1	47551765	47553015	1251	730	47552495	392	3100	128.08	B	N/A	N/A	N/A	N/A	N/A	N/A
chr1	47641752	47642182	431	235	47641987	23	153.79	19.03	A	N/A	N/A	N/A	N/A	N/A	N/A
chr1	47667074	47667451	378	189	47667263	17	108.81	16.67	A	chr1	47667218	47667374	MLT1K	LTR	MaLR
chr1	48673634	48673961	328	211	48673845	22	259.99	68.95	J	chr1	48673460	48673959	LTR12	LTR	ERV1
chr1	48676005	48676329	325	224	48676229	12	119.91	38.31	D	chr1	48676162	48676521	LTR12B	LTR	ERV1
chr1	49665981	49666129	149	75	49666056	13	234.66	38.06	J	chr1	49665710	49666401	LTR12	LTR	ERV1
chr1	50954441	50955241	801	533	50954974	63	741.86	111.08	M	chr1	50954698	50955426	LTR12	LTR	ERV1
chr1	51183245	51183779	535	273	51183518	23	95.92	12.4	G	chr1	51182521	51184333	HERVL40	LTR	ERVL
chr1	51198319	51198924	606	202	51198521	100	785.13	35.68	K	chr1	51198468	51198548	(CCG)n	Simple_repeat	Simple_repeat
chr1	51340271	51340796	526	187	51340458	50	488.75	63.88	D	chr1	51340352	51340584	MLT1J1	LTR	MaLR
chr1	51415928	51416707	780	594	51416522	81	1026.01	222.17	A	chr1	51416177	51416870	LTR12D	LTR	ERV1
chr1	51578576	51579038	463	289	51578865	56	563.98	66.05	D	N/A	N/A	N/A	N/A	N/A	N/A
chr1	51660113	51660855	743	334	51660447	46	292.53	32.2	M	N/A	N/A	N/A	N/A	N/A	N/A
chr1	51756183	51756734	552	224	51756407	33	115.03	10.78	L	N/A	N/A	N/A	N/A	N/A	N/A
chr1	51855140	51856152	1013	516	51855656	155	1036.55	47.84	P	N/A	N/A	N/A	N/A	N/A	N/A
chr1	51869149	51869543	395	214	51869363	25	156.7	18.09	G	chr1	51869217	51869519	LTR8A	LTR	ERV1
chr1	51886401	51886971	571	351	51886752	50	298.12	23.27	S	N/A	N/A	N/A	N/A	N/A	N/A
chr1	51967444	51968543	1100	552	51967996	181	1482.09	100.55	P	N/A	N/A	N/A	N/A	N/A	N/A
chr1	52084679	52085130	452	340	52085019	69	913.9	173.61	G	chr1	52084709	52086191	LTR12C	LTR	ERV1
chr1	52085366	52085724	359	87	52085453	14	107.42	32.54	G	chr1	52084709	52086191	LTR12C	LTR	ERV1
chr1	52116608	52117712	1105	510	52117118	248	2214.4	117.03	N	N/A	N/A	N/A	N/A	N/A	N/A
chr1	52167174	52167603	430	221	52167395	21	151.71	28.62	A	chr1	52167336	52167438	MLT1K	LTR	MaLR
chr1	52604323	52604868	546	321	52604644	73	489.64	32.54	B	N/A	N/A	N/A	N/A	N/A	N/A
chr1	52642507	52642974	468	267	52642774	27	119.27	15.61	L	N/A	N/A	N/A	N/A	N/A	N/A
chr1	52809900	52810663	764	294	52810194	128	1503.72	125.99	J	chr1	52809903	52810579	MER51A	LTR	ERV1
chr1	52827261	52827670	410	255	52827516	17	127.67	25.76	J	chr1	52827275	52827896	MER51A	LTR	ERV1
chr1	52941078	52941917	840	249	52941327	296	3100	118.62	T	N/A	N/A	N/A	N/A	N/A	N/A
chr1	53564106	53565205	1100	571	53564677	304	3008.35	112.14	K	N/A	N/A	N/A	N/A	N/A	N/A
chr1	53595286	53595533	248	102	53595388	20	219.77	46.37	D	chr1	53595278	53595509	MLT1J1	LTR	MaLR
chr1	53966941	53967278	338	137	53967078	30	276.68	40.68	A	N/A	N/A	N/A	N/A	N/A	N/A
chr1	53977122	53978161	1040	436	53977558	273	3100	300.55	A	N/A	N/A	N/A	N/A	N/A	N/A
chr1	54241690	54241997	308	204	54241894	62	950.04	196.6	J	chr1	54241477	54243048	LTR12C	LTR	ERV1
chr1	54290706	54291936	1231	358	54291064	208	1344.34	82.11	K	chr1	54290982	54291085	L2	LINE	L2
chr1	54437917	54439011	1095	436	54438353	201	1598.06	78	S	N/A	N/A	N/A	N/A	N/A	N/A
chr1	54581851	54582222	372	230	54582081	17	105.95	21.47	G	N/A	N/A	N/A	N/A	N/A	N/A
chr1	54644413	54645204	792	345	54644758	201	2326.86	173.77	L	chr1	54644748	54644771	GC_rich	Low_complexity	Low_complexity
chr1	54645608	54646235	628	322	54645930	171	1759.88	83.1	L	N/A	N/A	N/A	N/A	N/A	N/A
chr1	54691324	54691609	286	112	54691436	15	135.59	30.45	D	chr1	54691300	54691755	LTR33	LTR	ERVL
chr1	54726338	54726965	628	352	54726690	113	1045.56	74.31	V	N/A	N/A	N/A	N/A	N/A	N/A
chr1	54752342	54752835	494	276	54752618	246	3100	370.45	J	chr1	54752535	54752709	MLT1K	LTR	MaLR
chr1	54774862	54775223	362	246	54775108	11	101.99	30.64	D	N/A	N/A	N/A	N/A	N/A	N/A
chr1	54781476	54781898	423	272	54781748	27	178.31	29.83	D	chr1	54781671	54781858	L2	LINE	L2
chr1	54827965	54828170	206	104	54828069	10	104.6	26.56	D	chr1	54828047	54828107	L1MC5	LINE	L1
chr1	54854145	54854695	551	251	54854396	21	152.01	34.5	A	N/A	N/A	N/A	N/A	N/A	N/A
chr1	55002170	55003423	1254	786	55002956	366	3174.91	93.92	U	N/A	N/A	N/A	N/A	N/A	N/A
chr1	55012885	55013847	963	652	55013537	297	3100	135.49	J	chr1	55013497	55013725	MLT1K	LTR	MaLR
chr1	55125075	55125981	907	486	55125561	216	2219.57	100.18	B	N/A	N/A	N/A	N/A	N/A	N/A
chr1	55204128	55204709	582	309	55204437	134	1997.58	303.41	D	chr1	55204327	55204775	MLT1L	LTR	MaLR
chr1	56570402	56570822	421	202	56570604	17	160.98	45.26	D	N/A	N/A	N/A	N/A	N/A	N/A
chr1	57068445	57068846	402	114	57068559	13	116.72	39.36	D	chr1	57068546	57068917	MLT1K	LTR	MaLR
chr1	57234768	57235108	341	227	57234995	16	131.21	21.96	D	N/A	N/A	N/A	N/A	N/A	N/A
chr1	57311030	57311542	513	217	57311247	69	879.45	155.7	J	N/A	N/A	N/A	N/A	N/A	N/A
chr1	57931629	57931970	342	118	57931747	13	129.91	42.14	J	chr1	57931544	57932160	LTR12	LTR	ERV1
chr1	58405242	58405520	279	199	58405441	14	155.63	49.8	J	chr1	58405419	58406256	LTR12	LTR	ERV1
chr1	58489982	58490308	327	117	58490099	16	127.05	23.78	D	chr1	58489489	58490136	L2	LINE	L2
chr1	58682645	58683026	382	268	58682913	30	343.76	83.72	D	chr1	58682857	58683025	MLT1I	LTR	MaLR
chr1	58809054	58809427	374	300	58809354	13	96.94	18.74	D	N/A	N/A	N/A	N/A	N/A	N/A
chr1	58980293	58980777	485	149	58980442	28	254.69	57.47	D	chr1	58980413	58980573	MLT1L	LTR	MaLR
chr1	59022012	59022813	802	377	59022389	160	1656.44	103.3	B	N/A	N/A	N/A	N/A	N/A	N/A
chr1	59246724	59247427	704	387	59247111	80	610.12	53.4	D	N/A	N/A	N/A	N/A	N/A	N/A
chr1	59528545	59529127	583	385	59528930	24	98.59	10.73	D	N/A	N/A	N/A	N/A	N/A	N/A
chr1	59743625	59743907	283	115	59743740	15	120.65	23.92	D	N/A	N/A	N/A	N/A	N/A	N/A
chr1	60834948	60835342	395	206	60835154	27	154.49	19.43	D	chr1	60835090	60835347	MLT1H	LTR	MaLR
chr1	60904420	60904848	429	224	60904644	14	95.92	24.31	D	chr1	60904440	60904763	MLT1J2	LTR	MaLR
chr1	61125244	61125849	606	296	61125540	48	372.87	42.94	J	N/A	N/A	N/A	N/A	N/A	N/A
chr1	61315066	61315934	869	300	61315366	43	187.78	15.27	P	N/A	N/A	N/A	N/A	N/A	N/A
chr1	61315945	61316537	593	402	61316347	99	972.46	80.82	P	N/A	N/A	N/A	N/A	N/A	N/A
chr1	61422193	61423031	839	369	61422562	228	2622.84	155.69	V	N/A	N/A	N/A	N/A	N/A	N/A
chr1	61963614	61964020	407	163	61963777	29	186.62	22.54	B	N/A	N/A	N/A	N/A	N/A	N/A
chr1	62674313	62675234	922	446	62674759	202	2220.54	117.77	P	N/A	N/A	N/A	N/A	N/A	N/A
chr1	62915428	62915799	372	123	62915551	24	187.16	30.35	D	chr1	62915371	62915676	MLT1K	LTR	MaLR
chr1	63192847	63193496	650	354	63193201	143	2036.57	298.83	J	chr1	63192892	63193355	MLT1J	LTR	MaLR
chr1	63245344	63245696	353	144	63245488	21	190.5	40.92	D	chr1	63245103	63245541	MLT1L	LTR	MaLR
chr1	64441476	64442119	644	304	64441780	116	1557.86	133.96	J	N/A	N/A	N/A	N/A	N/A	N/A
chr1	65401658	65401911	254	111	65401769	10	90.1	18.78	G	chr1	65401539	65401895	MER57B	LTR	ERV1
chr1	65447687	65448065	379	104	65447791	17	90.99	12.88	M	N/A	N/A	N/A	N/A	N/A	N/A
chr1	65453886	65454314	429	222	65454108	26	228.47	39.3	M	N/A	N/A	N/A	N/A	N/A	N/A
chr1	65568955	65569558	604	314	65569269	171	2438.98	251.53	G	chr1	65569037	65569441	MLT1J	LTR	MaLR
chr1	65667299	65667704	406	225	65667524	55	632.98	76.25	G	chr1	65667347	65667752	L2	LINE	L2
chr1	66057191	66057523	333	216	66057407	21	195.79	39.43	D	chr1	66057151	66057473	MLT1I	LTR	MaLR
chr1	67127149	67127637	489	208	67127357	18	131.68	23.42	D	N/A	N/A	N/A	N/A	N/A	N/A
chr1	67162932	67163972	1041	183	67163115	135	1066.71	69.53	P	N/A	N/A	N/A	N/A	N/A	N/A
chr1	67167658	67168058	401	105	67167763	38	261.87	32.87	L	N/A	N/A	N/A	N/A	N/A	N/A
chr1	67377024	67377447	424	112	67377136	26	189.95	28.79	R	chr1	67377081	67377194	MLT1K	LTR	MaLR
chr1	67386888	67387409	522	198	67387086	54	578.98	89.65	D	N/A	N/A	N/A	N/A	N/A	N/A
chr1	67511801	67512245	445	253	67512054	17	160.99	40.48	D	chr1	67511998	67512106	MLT1K	LTR	MaLR
chr1	67796702	67796972	271	157	67796859	17	114.05	17.56	T	chr1	67796657	67797001	LTR16A	LTR	ERVL
chr1	67827829	67828309	481	193	67828022	23	146.76	24.25	J	chr1	67828011	67828141	L2	LINE	L2
chr1	67923097	67923767	671	351	67923448	98	846	42.6	P	N/A	N/A	N/A	N/A	N/A	N/A
chr1	67987809	67988279	471	175	67987984	24	133.75	19.91	U	N/A	N/A	N/A	N/A	N/A	N/A
chr1	68495245	68495620	376	117	68495362	17	126.52	29.06	D	chr1	68495288	68495366	MLT1H2	LTR	MaLR
chr1	68735140	68735602	463	249	68735389	48	426.58	52.95	B	N/A	N/A	N/A	N/A	N/A	N/A
chr1	70598500	70599018	519	336	70598836	132	1592.85	135.04	J	N/A	N/A	N/A	N/A	N/A	N/A
chr1	70648881	70649930	1050	558	70649439	286	2507.97	101.29	S	N/A	N/A	N/A	N/A	N/A	N/A
chr1	70880029	70880712	684	337	70880366	53	473.57	76.36	D	chr1	70880210	70880487	MLT1J	LTR	MaLR
chr1	74485532	74485865	334	256	74485788	13	131.28	45.97	J	chr1	74485323	74486737	LTR12C	LTR	ERV1
chr1	74978565	74978832	268	142	74978707	47	724.16	168.54	M	chr1	74978304	74979189	LTR12	LTR	ERV1
chr1	74983390	74983539	150	76	74983466	10	180.49	38.31	J	chr1	74983166	74983916	LTR12	LTR	ERV1
chr1	74983808	74984157	350	82	74983890	18	181.87	57.46	J	chr1	74983166	74983916	LTR12	LTR	ERV1
chr1	76541238	76541598	361	141	76541379	11	98.8	25.05	D	chr1	76541043	76541743	MER51A	LTR	ERV1
chr1	77589841	77590118	278	140	77589981	14	121.1	26.2	D	N/A	N/A	N/A	N/A	N/A	N/A
chr1	77734692	77735041	350	235	77734927	13	114.68	30.05	J	N/A	N/A	N/A	N/A	N/A	N/A
chr1	77769510	77769828	319	119	77769629	34	441.12	96.18	J	chr1	77769289	77770255	LTR12C	LTR	ERV1
chr1	78228108	78228441	334	118	78228226	41	500.46	66.98	G	chr1	78228219	78228457	MLT1L	LTR	MaLR
chr1	79563079	79563355	277	108	79563187	11	91.84	23.79	D	chr1	79563016	79563533	LTR8A	LTR	ERV1
chr1	81853531	81853722	192	97	81853628	10	136.74	38.31	J	chr1	81853375	81853926	LTR12_	LTR	ERV1
chr1	84324306	84324675	370	244	84324550	12	92.18	18.03	D	N/A	N/A	N/A	N/A	N/A	N/A
chr1	84537325	84537832	508	229	84537554	26	183.99	30.91	U	N/A	N/A	N/A	N/A	N/A	N/A
chr1	84580182	84580521	340	229	84580411	31	392.65	99.36	D	chr1	84580163	84580498	MLT1J1	LTR	MaLR
chr1	84582404	84582851	448	282	84582686	17	103.94	25.01	D	N/A	N/A	N/A	N/A	N/A	N/A
chr1	84928606	84929360	755	285	84928891	190	2128.6	135.53	L	N/A	N/A	N/A	N/A	N/A	N/A
chr1	85140858	85141093	236	104	85140962	15	180.49	53.63	J	chr1	85140953	85141718	LTR12	LTR	ERV1
chr1	85141193	85141506	314	109	85141302	22	248.98	65.12	J	chr1	85140953	85141718	LTR12	LTR	ERV1
chr1	85300154	85300881	728	364	85300518	148	2056.38	229.28	J	N/A	N/A	N/A	N/A	N/A	N/A
chr1	85439118	85439553	436	206	85439324	30	216.67	32.54	B	N/A	N/A	N/A	N/A	N/A	N/A
chr1	85514635	85515205	571	344	85514979	38	200.24	20.43	B	N/A	N/A	N/A	N/A	N/A	N/A
chr1	85517122	85517580	459	197	85517319	46	409.43	60.6	E	N/A	N/A	N/A	N/A	N/A	N/A
chr1	85541967	85542517	551	229	85542196	45	473.77	84.99	J	chr1	85542039	85542378	MLT1J	LTR	MaLR
chr1	86634323	86634950	628	300	86634623	33	251.29	43.6	T	N/A	N/A	N/A	N/A	N/A	N/A
chr1	86761483	86762097	615	294	86761777	27	264.07	76.61	J	chr1	86761399	86762640	LTR12C	LTR	ERV1
chr1	87040191	87040495	305	128	87040319	12	123.32	38.31	J	chr1	87039888	87040589	LTR12D	LTR	ERV1
chr1	87152342	87152862	521	374	87152716	73	667.38	56.21	K	N/A	N/A	N/A	N/A	N/A	N/A
chr1	87525341	87525679	339	119	87525460	21	170.53	31.44	J	chr1	87525352	87525738	MLT1J	LTR	MaLR
chr1	87566366	87567016	651	292	87566658	121	1308.22	132.87	S	N/A	N/A	N/A	N/A	N/A	N/A
chr1	87669127	87669453	327	207	87669334	15	159.22	42.14	J	chr1	87669150	87669728	LTR12_	LTR	ERV1
chr1	87767011	87767412	402	192	87767203	12	103.54	27.85	J	chr1	87766737	87767767	LTR12D	LTR	ERV1
chr1	87823902	87824211	310	175	87824077	28	336.53	75.4	D	chr1	87823774	87824168	MLT1J2	LTR	MaLR
chr1	87873807	87874161	355	178	87873985	10	91.05	26.81	J	chr1	87873590	87875062	LTR12C	LTR	ERV1
chr1	88064880	88065242	363	227	88065107	19	189.78	40.52	D	N/A	N/A	N/A	N/A	N/A	N/A
chr1	88705846	88706144	299	64	88705910	10	98.76	22.98	J	chr1	88705454	88706630	LTR12C	LTR	ERV1
chr1	88706189	88706431	243	93	88706282	16	179.09	57.46	J	chr1	88705454	88706630	LTR12C	LTR	ERV1
chr1	88922161	88922681	521	269	88922430	60	411.64	23.35	K	N/A	N/A	N/A	N/A	N/A	N/A
chr1	89212844	89213375	532	381	89213225	54	689.74	125.13	J	chr1	89212871	89213556	LTR12	LTR	ERV1
chr1	89230943	89231569	627	315	89231258	53	336.41	28.62	B	N/A	N/A	N/A	N/A	N/A	N/A
chr1	89457519	89457822	304	113	89457632	11	110.58	38.31	J	N/A	N/A	N/A	N/A	N/A	N/A
chr1	89751232	89751731	500	169	89751401	37	358.31	58.55	D	chr1	89750851	89751714	L1M4c	LINE	L1
chr1	89762416	89763378	963	555	89762971	167	1513.84	105.03	S	N/A	N/A	N/A	N/A	N/A	N/A
chr1	89871870	89872392	523	286	89872156	26	136.46	19.04	U	N/A	N/A	N/A	N/A	N/A	N/A
chr1	90058727	90059482	756	370	90059097	134	1242.51	96.11	P	N/A	N/A	N/A	N/A	N/A	N/A
chr1	90203502	90203869	368	209	90203711	16	114.06	22.08	D	chr1	90203586	90203949	MLT1I	LTR	MaLR
chr1	90232907	90233521	615	311	90233218	75	722.43	68.19	S	N/A	N/A	N/A	N/A	N/A	N/A
chr1	90955816	90956593	778	390	90956206	135	1741.92	226.6	J	chr1	90956139	90956213	GC_rich	Low_complexity	Low_complexity
chr1	91045425	91045899	475	223	91045648	82	1002.18	124.84	J	chr1	91045404	91045783	MLT1H	LTR	MaLR
chr1	91259288	91259785	498	367	91259655	62	563.42	51.32	B	N/A	N/A	N/A	N/A	N/A	N/A
chr1	91260051	91260698	648	347	91260398	37	200.61	22.54	B	N/A	N/A	N/A	N/A	N/A	N/A
chr1	91373898	91374516	619	292	91374190	48	568.5	111.08	J	chr1	91374002	91374512	MLT2B3	LTR	ERVL
chr1	91739444	91739976	533	254	91739698	23	136.19	14.98	K	N/A	N/A	N/A	N/A	N/A	N/A
chr1	91820445	91821022	578	295	91820740	47	398.91	51.29	D	chr1	91820350	91820848	MLT1L	LTR	MaLR
chr1	91859469	91860014	546	206	91859675	54	462.53	61.89	J	chr1	91859527	91860075	MLT1L	LTR	MaLR
chr1	92124059	92124582	524	329	92124388	64	617.69	71.99	U	N/A	N/A	N/A	N/A	N/A	N/A
chr1	92187203	92187664	462	289	92187492	41	372.29	48.09	D	N/A	N/A	N/A	N/A	N/A	N/A
chr1	93023160	93023658	499	208	93023368	23	124.02	18.4	B	N/A	N/A	N/A	N/A	N/A	N/A
chr1	93042782	93043161	380	181	93042963	26	215.42	30.91	T	chr1	93042801	93043105	MER65D	LTR	ERV1
chr1	93246185	93246473	289	118	93246303	18	172.13	32.79	D	chr1	93246128	93246705	MLT1K	LTR	MaLR
chr1	93246711	93246968	258	113	93246824	15	129.95	32.79	D	N/A	N/A	N/A	N/A	N/A	N/A
chr1	93317059	93317735	677	305	93317364	32	143.04	14.86	S	N/A	N/A	N/A	N/A	N/A	N/A
chr1	93408842	93409160	319	118	93408960	28	357.36	76.61	G	chr1	93408238	93409560	LTR12C	LTR	ERV1
chr1	93418410	93419010	601	266	93418676	64	451.94	34.96	L	N/A	N/A	N/A	N/A	N/A	N/A
chr1	93680215	93680784	570	294	93680509	28	281.73	73.6	D	chr1	93680330	93680764	LTR3B	LTR	ERVK
chr1	93998798	93999176	379	159	93998957	18	154.27	34.17	D	chr1	93998714	93999062	MLT1K	LTR	MaLR
chr1	94616628	94616972	345	260	94616888	12	116.72	34.47	J	chr1	94616499	94616929	LTR12B	LTR	ERV1
chr1	94915814	94916291	478	266	94916080	80	1153	213.55	J	chr1	94915951	94916120	MLT1K	LTR	MaLR
chr1	94972931	94973490	560	270	94973201	86	768.98	62.86	J	N/A	N/A	N/A	N/A	N/A	N/A
chr1	95381123	95381467	345	118	95381241	11	97.11	26.42	M	chr1	95381096	95381457	MER51A	LTR	ERV1
chr1	95515871	95516285	415	221	95516092	36	450.32	103.42	D	chr1	95515909	95516349	MLT1K	LTR	MaLR
chr1	95776321	95776554	234	118	95776439	13	150.38	49.25	J	chr1	95776144	95776819	LTR12	LTR	ERV1
chr1	96817755	96818121	367	216	96817971	22	249.13	61.29	D	chr1	96817858	96817999	MLT1I	LTR	MaLR
chr1	96929053	96929331	279	173	96929226	25	324.05	76.61	J	chr1	96928829	96929488	LTR12	LTR	ERV1
chr1	96965429	96965712	284	168	96965597	15	168.63	53.63	G	chr1	96965052	96966141	L1ME1	LINE	L1
chr1	99818671	99819145	475	276	99818947	18	133.87	28.1	D	N/A	N/A	N/A	N/A	N/A	N/A
chr1	100019944	100020299	356	163	100020107	14	122.54	31.49	J	chr1	100019822	100020291	MER51E	LTR	ERV1
chr1	100230950	100231316	367	110	100231060	16	103.94	20.48	M	N/A	N/A	N/A	N/A	N/A	N/A
chr1	100231740	100231923	184	93	100231833	11	105.69	23.61	M	N/A	N/A	N/A	N/A	N/A	N/A
chr1	100370566	100371062	497	272	100370838	23	120.21	16.39	K	N/A	N/A	N/A	N/A	N/A	N/A
chr1	100487687	100488241	555	401	100488088	101	817.07	42.18	B	N/A	N/A	N/A	N/A	N/A	N/A
chr1	100590216	100590771	556	221	100590437	27	138.61	20.16	L	N/A	N/A	N/A	N/A	N/A	N/A
chr1	101023861	101024233	373	160	101024021	14	96.09	23	T	chr1	101023680	101024348	MER72	LTR	ERV1
chr1	101037237	101037561	325	221	101037458	13	116.12	20.04	D	chr1	101037206	101037574	MLT1I	LTR	MaLR
chr1	101043750	101044130	381	239	101043989	12	96.12	25.76	D	N/A	N/A	N/A	N/A	N/A	N/A
chr1	101134730	101135244	515	298	101135028	32	140.38	11.06	N	N/A	N/A	N/A	N/A	N/A	N/A
chr1	101595514	101595937	424	229	101595743	20	143.94	27.31	D	N/A	N/A	N/A	N/A	N/A	N/A
chr1	102472419	102472643	225	113	102472532	14	165.62	53.63	J	chr1	102472088	102473474	LTR12C	LTR	ERV1
chr1	102898773	102899107	335	219	102898992	46	660.12	130.24	T	chr1	102898724	102899084	MER52A	LTR	ERV1
chr1	105442081	105442471	391	97	105442178	22	243.02	57.46	J	chr1	105441701	105442391	LTR12_	LTR	ERV1
chr1	108984428	108984732	305	111	108984539	22	245.53	64.4	J	chr1	108984037	108985571	LTR12C	LTR	ERV1
chr1	109036125	109036695	571	281	109036406	49	236.73	23.78	S	N/A	N/A	N/A	N/A	N/A	N/A
chr1	109091283	109091909	627	331	109091614	47	257.75	32.3	U	N/A	N/A	N/A	N/A	N/A	N/A
chr1	109220846	109221441	596	217	109221063	36	217.14	24.8	V	N/A	N/A	N/A	N/A	N/A	N/A
chr1	109307413	109307936	524	204	109307617	34	163.13	19.85	B	N/A	N/A	N/A	N/A	N/A	N/A
chr1	109585493	109585812	320	205	109585698	18	117.24	17.68	T	N/A	N/A	N/A	N/A	N/A	N/A
chr1	109627080	109627665	586	285	109627365	45	236.22	28.88	K	N/A	N/A	N/A	N/A	N/A	N/A
chr1	109741757	109742640	884	425	109742182	307	3100	173.89	N	N/A	N/A	N/A	N/A	N/A	N/A
chr1	109770189	109771328	1140	470	109770659	408	3100	136.94	K	N/A	N/A	N/A	N/A	N/A	N/A
chr1	109805491	109805791	301	191	109805682	12	103.1	20.68	A	chr1	109805311	109805913	LTR12_	LTR	ERV1
chr1	109980826	109981270	445	230	109981056	55	546.31	65.57	D	N/A	N/A	N/A	N/A	N/A	N/A
chr1	109993486	109993832	347	168	109993654	22	199.18	40.79	J	chr1	109993497	109993999	MER51A	LTR	ERV1
chr1	110011909	110012274	366	225	110012134	19	110.81	16.39	T	N/A	N/A	N/A	N/A	N/A	N/A
chr1	110014405	110014662	258	109	110014514	12	121.66	34.56	J	N/A	N/A	N/A	N/A	N/A	N/A
chr1	110166124	110166827	704	362	110166486	92	628.03	46.43	V	N/A	N/A	N/A	N/A	N/A	N/A
chr1	110672458	110672807	350	145	110672603	35	385.39	72.6	T	chr1	110672352	110672685	MLT1J	LTR	MaLR
chr1	110682388	110684177	1790	691	110683079	1147	3100	110.93	P	N/A	N/A	N/A	N/A	N/A	N/A
chr1	110739670	110740000	331	215	110739885	43	564.54	127.29	J	chr1	110739563	110741048	LTR12C	LTR	ERV1
chr1	110937919	110938422	504	254	110938173	35	318.98	60.59	D	N/A	N/A	N/A	N/A	N/A	N/A
chr1	110963547	110963985	439	194	110963741	20	95.38	11.31	D	N/A	N/A	N/A	N/A	N/A	N/A
chr1	111307822	111308665	844	525	111308347	260	2574.07	92.2	N	N/A	N/A	N/A	N/A	N/A	N/A
chr1	111690137	111690655	519	271	111690408	27	125.43	15.64	T	N/A	N/A	N/A	N/A	N/A	N/A
chr1	111793284	111793776	493	206	111793490	54	361.65	28.18	K	N/A	N/A	N/A	N/A	N/A	N/A
chr1	111812222	111812549	328	111	111812333	20	136.55	18.03	T	chr1	111812073	111812652	MLT1E	LTR	MaLR
chr1	111813634	111814059	426	206	111813840	63	646.9	65.83	D	chr1	111813637	111813927	MLT1J2	LTR	MaLR
chr1	112024330	112024800	471	311	112024641	18	172.41	38.31	M	chr1	112024253	112024739	LTR12B	LTR	ERV1
chr1	112082842	112084164	1323	783	112083625	279	3230.05	190.21	T	N/A	N/A	N/A	N/A	N/A	N/A
chr1	112739980	112740723	744	277	112740257	205	2380.24	137	T	N/A	N/A	N/A	N/A	N/A	N/A
chr1	113030966	113031306	341	192	113031158	23	168.72	24.41	M	chr1	113030641	113031203	L2	LINE	L2
chr1	113049115	113049501	387	285	113049400	36	179.31	16.98	L	N/A	N/A	N/A	N/A	N/A	N/A
chr1	113239517	113239905	389	279	113239796	41	544.01	134.07	J	chr1	113238670	113240101	LTR12C	LTR	ERV1
chr1	113250233	113250671	439	115	113250348	26	102.64	13.97	M	N/A	N/A	N/A	N/A	N/A	N/A
chr1	113301460	113301958	499	319	113301779	114	1129.9	80.84	N	N/A	N/A	N/A	N/A	N/A	N/A
chr1	113416691	113417693	1003	598	113417289	170	1157.21	53.81	S	N/A	N/A	N/A	N/A	N/A	N/A
chr1	113551180	113551578	399	196	113551376	24	111.54	12.49	R	chr1	113551176	113551703	MLT1K	LTR	MaLR
chr1	113626887	113627572	686	344	113627231	79	731.2	79.53	D	N/A	N/A	N/A	N/A	N/A	N/A
chr1	113647362	113647746	385	226	113647588	52	635.18	104.09	J	N/A	N/A	N/A	N/A	N/A	N/A
chr1	113733857	113734946	1090	647	113734504	220	2265.46	149.51	V	N/A	N/A	N/A	N/A	N/A	N/A
chr1	114130238	114130718	481	204	114130442	43	388.28	67.79	G	N/A	N/A	N/A	N/A	N/A	N/A
chr1	114248635	114249752	1118	634	114249269	78	284.61	18.4	K	N/A	N/A	N/A	N/A	N/A	N/A
chr1	114552817	114553225	409	144	114552961	17	108.41	17.94	A	chr1	114552784	114553008	MLT1K	LTR	MaLR
chr1	114681551	114682155	605	264	114681815	35	224.89	33.9	D	chr1	114681722	114682104	LTR67	LTR	ERVL
chr1	114868995	114869394	400	225	114869220	14	103.45	21.08	J	N/A	N/A	N/A	N/A	N/A	N/A
chr1	115013993	115014528	536	322	115014315	39	174.46	15.85	T	N/A	N/A	N/A	N/A	N/A	N/A
chr1	116641556	116642202	647	215	116641771	47	508.93	99.82	J	chr1	116641345	116642688	LTR12C	LTR	ERV1
chr1	116759745	116760450	706	255	116760000	132	1075.72	60.83	P	N/A	N/A	N/A	N/A	N/A	N/A
chr1	116881521	116881992	472	193	116881714	18	137.87	31.89	M	N/A	N/A	N/A	N/A	N/A	N/A
chr1	116917612	116917851	240	123	116917735	17	113.04	16.36	N	N/A	N/A	N/A	N/A	N/A	N/A
chr1	117005678	117006270	593	336	117006014	123	1504.44	145.97	Q	chr1	117005841	117006189	MLT1J	LTR	MaLR
chr1	117042297	117042664	368	239	117042536	17	106.7	18.61	D	chr1	117042488	117042569	MLT1K	LTR	MaLR
chr1	117075449	117076212	764	325	117075774	168	1902.04	116.78	J	chr1	117075681	117076058	MLT1K	LTR	MaLR
chr1	117171255	117171789	535	377	117171632	56	409.58	36.42	B	chr1	117171573	117171739	L2	LINE	L2
chr1	117403955	117404830	876	331	117404286	212	1938.32	88.73	K	N/A	N/A	N/A	N/A	N/A	N/A
chr1	117465756	117466713	958	536	117466292	380	3100	108.21	U	N/A	N/A	N/A	N/A	N/A	N/A
chr1	117495502	117495928	427	113	117495615	30	283.24	62.53	J	chr1	117495360	117495879	LTR12_	LTR	ERV1
chr1	117516823	117517259	437	234	117517057	19	162.27	26.83	A	chr1	117516862	117517404	LTR12_	LTR	ERV1
chr1	117681533	117681932	400	200	117681733	18	137.2	28.85	J	chr1	117681724	117682259	LTR12B	LTR	ERV1
chr1	117949532	117950352	821	508	117950040	121	1012.87	61.06	P	N/A	N/A	N/A	N/A	N/A	N/A
chr1	118039956	118040406	451	191	118040147	21	96.32	17.43	T	N/A	N/A	N/A	N/A	N/A	N/A
chr1	118052448	118053423	976	656	118053104	69	457.58	44.24	T	chr1	118053082	118053138	MIRb	SINE	MIR
chr1	118273449	118274079	631	344	118273793	114	867.19	42.51	K	N/A	N/A	N/A	N/A	N/A	N/A
chr1	118472933	118473246	314	134	118473067	19	147.72	25.76	D	N/A	N/A	N/A	N/A	N/A	N/A
chr1	118492385	118492666	282	169	118492554	19	166.14	32.69	J	chr1	118492358	118492834	LTR12_	LTR	ERV1
chr1	118820164	118820456	293	188	118820352	13	131.02	40.15	J	chr1	118819898	118820771	LTR12D	LTR	ERV1
chr1	119484427	119485108	682	435	119484862	76	532.4	44.8	K	N/A	N/A	N/A	N/A	N/A	N/A
chr1	119678597	119678886	290	106	119678703	38	483.26	99.29	J	chr1	119677727	119678937	LTR12C	LTR	ERV1
chr1	119711717	119712224	508	188	119711905	48	431.62	57.96	D	N/A	N/A	N/A	N/A	N/A	N/A
chr1	120019597	120020261	665	324	120019921	53	323.51	34.26	T	N/A	N/A	N/A	N/A	N/A	N/A
chr1	120055887	120056313	427	165	120056052	29	172.82	20	S	N/A	N/A	N/A	N/A	N/A	N/A
chr1	120639745	120640358	614	482	120640227	31	304.71	72.78	F	N/A	N/A	N/A	N/A	N/A	N/A
chr1	120962736	120963030	295	216	120962952	13	138.48	45.97	D	N/A	N/A	N/A	N/A	N/A	N/A
chr1	121029817	121030191	375	134	121029951	15	150.13	45.97	T	chr1	121024507	121030925	L1PA7	LINE	L1
chr1	121185567	121187043	1477	721	121186288	597	463.34	3.74	F	chr1	121181673	121186952	ALR/Alpha	Satellite	centr
chr1	143242957	143243138	182	92	143243049	10	107.15	17.89	P	chr1	143242744	143243073	LTR56	LTR	ERV1
chr1	143244918	143245658	741	165	143245083	103	492.92	28.22	F	N/A	N/A	N/A	N/A	N/A	N/A
chr1	143704173	143704893	721	368	143704541	76	161.05	9.17	F	N/A	N/A	N/A	N/A	N/A	N/A
chr1	143715560	143716225	666	401	143715961	60	141.96	9.33	F	N/A	N/A	N/A	N/A	N/A	N/A
chr1	144093594	144093890	297	180	144093774	42	359.75	34.43	K	N/A	N/A	N/A	N/A	N/A	N/A
chr1	144124233	144124569	337	142	144124375	65	740.21	84.44	T	N/A	N/A	N/A	N/A	N/A	N/A
chr1	144149209	144150283	1075	545	144149754	372	3100	142.73	P	N/A	N/A	N/A	N/A	N/A	N/A
chr1	144166530	144167193	664	259	144166789	85	696.19	50.49	K	N/A	N/A	N/A	N/A	N/A	N/A
chr1	144181416	144182168	753	356	144181772	244	2838.03	153.25	V	N/A	N/A	N/A	N/A	N/A	N/A
chr1	144187980	144188613	634	427	144188407	65	390.93	24.29	V	N/A	N/A	N/A	N/A	N/A	N/A
chr1	144218582	144219162	581	333	144218915	68	585.45	66.24	V	N/A	N/A	N/A	N/A	N/A	N/A
chr1	144350636	144351191	556	180	144350816	39	449.77	80.44	M	chr1	144350804	144351396	LTR12_	LTR	ERV1
chr1	145183443	145183857	415	300	145183743	18	94.05	14.25	L	N/A	N/A	N/A	N/A	N/A	N/A
chr1	145456147	145456666	520	209	145456356	104	1588.21	289.37	J	chr1	145455889	145456591	LTR12_	LTR	ERV1
chr1	147491084	147491431	348	122	147491206	44	514.32	87.41	K	N/A	N/A	N/A	N/A	N/A	N/A
chr1	148124704	148125228	525	285	148124989	183	2414.47	137.82	L	N/A	N/A	N/A	N/A	N/A	N/A
chr1	148125973	148126743	771	206	148126179	169	1657.92	81.88	N	N/A	N/A	N/A	N/A	N/A	N/A
chr1	148175794	148176241	448	269	148176063	25	156.7	19.24	T	N/A	N/A	N/A	N/A	N/A	N/A
chr1	148401833	148402417	585	287	148402120	38	173	18.84	U	N/A	N/A	N/A	N/A	N/A	N/A
chr1	148474747	148475687	941	515	148475262	463	3100	216.59	N	N/A	N/A	N/A	N/A	N/A	N/A
chr1	148507947	148508357	411	167	148508114	69	684.58	65.57	U	N/A	N/A	N/A	N/A	N/A	N/A
chr1	148521225	148521556	332	190	148521415	16	120.99	25.76	J	N/A	N/A	N/A	N/A	N/A	N/A
chr1	148602832	148603360	529	335	148603167	44	260	24.7	P	N/A	N/A	N/A	N/A	N/A	N/A
chr1	148726141	148726796	656	365	148726506	245	3100	131.38	V	N/A	N/A	N/A	N/A	N/A	N/A
chr1	148754231	148755128	898	503	148754734	206	1849.48	97.16	V	N/A	N/A	N/A	N/A	N/A	N/A
chr1	148801130	148801696	567	296	148801426	66	453.54	33.01	K	N/A	N/A	N/A	N/A	N/A	N/A
chr1	148818174	148818710	537	296	148818470	21	134.96	18.4	N	N/A	N/A	N/A	N/A	N/A	N/A
chr1	148867883	148869227	1345	462	148868345	795	3100	213.6	K	N/A	N/A	N/A	N/A	N/A	N/A
chr1	148935915	148936983	1069	586	148936501	571	3100	170.36	B	N/A	N/A	N/A	N/A	N/A	N/A
chr1	149115728	149116253	526	219	149115947	34	234.18	36.59	B	N/A	N/A	N/A	N/A	N/A	N/A
chr1	149138692	149139391	700	279	149138971	31	287.85	61.29	J	chr1	149138924	149139613	LTR12_	LTR	ERV1
chr1	149240591	149241050	460	299	149240890	27	164.72	21.33	R	N/A	N/A	N/A	N/A	N/A	N/A
chr1	149293872	149294319	448	294	149294166	29	184.51	24.37	P	N/A	N/A	N/A	N/A	N/A	N/A
chr1	149299157	149299624	468	225	149299382	21	112.47	18.4	L	N/A	N/A	N/A	N/A	N/A	N/A
chr1	149370359	149370713	355	129	149370488	15	120.04	22.86	D	N/A	N/A	N/A	N/A	N/A	N/A
chr1	149385728	149386369	642	174	149385902	137	1398.8	111.29	T	N/A	N/A	N/A	N/A	N/A	N/A
chr1	149405499	149405791	293	117	149405616	17	99.24	18.74	U	N/A	N/A	N/A	N/A	N/A	N/A
chr1	149437249	149437749	501	307	149437556	38	236.33	28.79	V	N/A	N/A	N/A	N/A	N/A	N/A
chr1	149493447	149494232	786	339	149493786	252	2670.07	137.84	V	N/A	N/A	N/A	N/A	N/A	N/A
chr1	149520457	149521786	1330	750	149521207	454	3100	107.92	S	N/A	N/A	N/A	N/A	N/A	N/A
chr1	149579902	149580934	1033	745	149580647	109	769.6	62.09	J	chr1	149580537	149581004	MLT1K	LTR	MaLR
chr1	149585933	149586742	810	520	149586453	220	2710.13	176.26	U	N/A	N/A	N/A	N/A	N/A	N/A
chr1	149698317	149698911	595	302	149698619	129	1506.9	144.55	B	N/A	N/A	N/A	N/A	N/A	N/A
chr1	150029103	150030313	1211	625	150029728	444	3100	190.63	V	N/A	N/A	N/A	N/A	N/A	N/A
chr1	150065103	150065574	472	219	150065322	27	227.93	45.08	D	N/A	N/A	N/A	N/A	N/A	N/A
chr1	150075496	150075889	394	248	150075744	21	129.67	21.57	D	N/A	N/A	N/A	N/A	N/A	N/A
chr1	150144188	150144449	262	160	150144348	20	229.24	57.58	P	chr1	150144223	150144507	MER61C	LTR	ERV1
chr1	150181232	150181544	313	182	150181414	24	222.06	34.1	D	N/A	N/A	N/A	N/A	N/A	N/A
chr1	150286916	150287587	672	338	150287254	86	606.63	45.28	U	N/A	N/A	N/A	N/A	N/A	N/A
chr1	151250291	151250663	373	224	151250515	37	483.74	122.58	J	chr1	151250063	151250857	LTR12	LTR	ERV1
chr1	151761485	151761853	369	115	151761600	12	112.54	41.67	J	chr1	151760702	151762088	LTR12C	LTR	ERV1
chr1	151866410	151867107	698	443	151866853	55	299.79	14.71	U	N/A	N/A	N/A	N/A	N/A	N/A
chr1	151909722	151910681	960	476	151910198	231	2581.4	139.34	B	N/A	N/A	N/A	N/A	N/A	N/A
chr1	151966575	151967312	738	461	151967036	134	1087.43	58.5	V	N/A	N/A	N/A	N/A	N/A	N/A
chr1	152036956	152037544	589	292	152037248	20	119.11	24.27	D	N/A	N/A	N/A	N/A	N/A	N/A
chr1	152161560	152162804	1245	660	152162220	470	3100	204.03	N	N/A	N/A	N/A	N/A	N/A	N/A
chr1	152195699	152196136	438	235	152195934	30	203.83	29.44	S	N/A	N/A	N/A	N/A	N/A	N/A
chr1	152202246	152203251	1006	489	152202735	170	1327.66	81.7	P	N/A	N/A	N/A	N/A	N/A	N/A
chr1	152206280	152207440	1161	627	152206907	403	3100	175.59	N	N/A	N/A	N/A	N/A	N/A	N/A
chr1	152322027	152322554	528	230	152322257	63	855.14	210.68	J	chr1	152321834	152322516	LTR12_	LTR	ERV1
chr1	152398725	152399012	288	185	152398910	17	135.13	25.09	N	N/A	N/A	N/A	N/A	N/A	N/A
chr1	152422224	152422657	434	209	152422433	67	641.76	57.38	N	N/A	N/A	N/A	N/A	N/A	N/A
chr1	152445334	152445843	510	231	152445565	30	145.91	21.9	D	N/A	N/A	N/A	N/A	N/A	N/A
chr1	152459445	152459989	545	287	152459732	30	166.72	24.64	K	N/A	N/A	N/A	N/A	N/A	N/A
chr1	152494287	152494561	275	125	152494412	17	113.6	17.71	M	N/A	N/A	N/A	N/A	N/A	N/A
chr1	152560053	152560289	237	125	152560178	10	91.19	23.19	V	N/A	N/A	N/A	N/A	N/A	N/A
chr1	152568725	152569086	362	220	152568945	40	430.8	67.47	E	N/A	N/A	N/A	N/A	N/A	N/A
chr1	152917736	152917991	256	172	152917908	12	132.78	38.31	J	chr1	152916954	152918412	LTR12C	LTR	ERV1
chr1	153109104	153109589	486	284	153109388	25	101	11.71	T	N/A	N/A	N/A	N/A	N/A	N/A
chr1	153194911	153195644	734	396	153195307	82	613.51	44.59	U	N/A	N/A	N/A	N/A	N/A	N/A
chr1	153209636	153210519	884	271	153209907	36	159.66	14.72	P	N/A	N/A	N/A	N/A	N/A	N/A
chr1	153213155	153214208	1054	505	153213660	445	3100	234.19	L	N/A	N/A	N/A	N/A	N/A	N/A
chr1	153221945	153222868	924	409	153222354	378	3100	182.99	S	N/A	N/A	N/A	N/A	N/A	N/A
chr1	153240792	153241674	883	503	153241295	246	2903.2	196.79	L	N/A	N/A	N/A	N/A	N/A	N/A
chr1	153251090	153251594	505	204	153251294	72	594.54	47.39	G	N/A	N/A	N/A	N/A	N/A	N/A
chr1	153256264	153256712	449	167	153256431	18	97.84	18.98	E	N/A	N/A	N/A	N/A	N/A	N/A
chr1	153302597	153303075	479	161	153302758	35	252.19	31.23	V	N/A	N/A	N/A	N/A	N/A	N/A
chr1	153309808	153310378	571	370	153310178	25	152.71	20.42	T	N/A	N/A	N/A	N/A	N/A	N/A
chr1	153310666	153311301	636	352	153311018	71	641.86	74.42	T	N/A	N/A	N/A	N/A	N/A	N/A
chr1	153463834	153464402	569	197	153464031	163	1950.72	117.1	N	N/A	N/A	N/A	N/A	N/A	N/A
chr1	153480903	153481470	568	201	153481104	34	234.18	23.41	N	N/A	N/A	N/A	N/A	N/A	N/A
chr1	153498277	153499018	742	427	153498704	63	387.28	21.94	U	N/A	N/A	N/A	N/A	N/A	N/A
chr1	153513427	153513882	456	229	153513656	21	118.66	18.03	E	N/A	N/A	N/A	N/A	N/A	N/A
chr1	153544680	153545561	882	477	153545157	198	1957.6	93.84	S	N/A	N/A	N/A	N/A	N/A	N/A
chr1	153560383	153561185	803	430	153560813	149	1206.49	52.24	V	N/A	N/A	N/A	N/A	N/A	N/A
chr1	153846151	153846687	537	319	153846470	56	651.94	74.7	S	N/A	N/A	N/A	N/A	N/A	N/A
chr1	153981777	153982264	488	372	153982149	36	424.95	68.95	V	N/A	N/A	N/A	N/A	N/A	N/A
chr1	154170734	154171247	514	191	154170925	30	190.34	29.63	B	N/A	N/A	N/A	N/A	N/A	N/A
chr1	154350890	154351410	521	237	154351127	38	255.54	35.13	P	N/A	N/A	N/A	N/A	N/A	N/A
chr1	154397305	154397615	311	195	154397500	37	355.53	37.21	T	N/A	N/A	N/A	N/A	N/A	N/A
chr1	154429977	154430703	727	461	154430438	88	699.69	43.28	K	N/A	N/A	N/A	N/A	N/A	N/A
chr1	154448873	154449939	1067	492	154449365	412	3100	121.56	S	N/A	N/A	N/A	N/A	N/A	N/A
chr1	154519146	154519771	626	140	154519286	34	203.48	20.61	B	N/A	N/A	N/A	N/A	N/A	N/A
chr1	154574212	154575388	1177	586	154574798	342	3100	107.01	B	N/A	N/A	N/A	N/A	N/A	N/A
chr1	154657865	154658605	741	390	154658255	73	702.33	87.74	T	N/A	N/A	N/A	N/A	N/A	N/A
chr1	154660300	154660979	680	329	154660629	67	557.15	65.08	E	N/A	N/A	N/A	N/A	N/A	N/A
chr1	154715984	154716373	390	162	154716146	16	112.11	22.73	D	N/A	N/A	N/A	N/A	N/A	N/A
chr1	154736905	154737726	822	395	154737300	194	2179.32	136.03	K	N/A	N/A	N/A	N/A	N/A	N/A
chr1	154739608	154740099	492	265	154739873	72	680.03	75.84	N	N/A	N/A	N/A	N/A	N/A	N/A
chr1	154741499	154742130	632	400	154741899	164	1795.82	140.42	E	N/A	N/A	N/A	N/A	N/A	N/A
chr1	154815859	154816157	299	188	154816047	11	102.25	31.8	D	N/A	N/A	N/A	N/A	N/A	N/A
chr1	154854744	154854915	172	87	154854831	15	223.39	38.64	D	chr1	154854744	154854904	AluJo/FRAM	SINE	Alu
chr1	154988004	154988493	490	279	154988283	22	110.07	19.21	L	N/A	N/A	N/A	N/A	N/A	N/A
chr1	155003390	155004109	720	471	155003861	44	138.22	10.96	P	N/A	N/A	N/A	N/A	N/A	N/A
chr1	155131235	155131641	407	196	155131431	29	153.58	12.88	T	N/A	N/A	N/A	N/A	N/A	N/A
chr1	155464358	155464597	240	98	155464456	13	138.01	37.1	T	chr1	155464246	155464746	ERVL-B4	LTR	ERVL
chr1	155682055	155682381	327	175	155682230	43	610.76	145.56	J	chr1	155681851	155683260	LTR12C	LTR	ERV1
chr1	156414174	156414651	478	258	156414432	27	259.52	51.52	D	N/A	N/A	N/A	N/A	N/A	N/A
chr1	157258780	157258997	218	110	157258890	11	119.97	30.89	T	chr1	157258710	157259285	LTR10C	LTR	ERV1
chr1	157444286	157444539	254	137	157444423	11	95.28	21.08	E	N/A	N/A	N/A	N/A	N/A	N/A
chr1	158016990	158017673	684	290	158017280	100	837.94	59.16	T	N/A	N/A	N/A	N/A	N/A	N/A
chr1	158075643	158076006	364	203	158075846	34	310.61	41.86	D	N/A	N/A	N/A	N/A	N/A	N/A
chr1	158131078	158131364	287	133	158131211	13	106.87	21.47	D	chr1	158131065	158131536	LTR67	LTR	ERVL
chr1	158181979	158182478	500	139	158182118	60	564.28	64.4	J	N/A	N/A	N/A	N/A	N/A	N/A
chr1	158306495	158307077	583	299	158306794	31	220.52	37.78	D	N/A	N/A	N/A	N/A	N/A	N/A
chr1	158521350	158521873	524	269	158521619	43	396.16	59.78	U	N/A	N/A	N/A	N/A	N/A	N/A
chr1	158589569	158589962	394	268	158589837	14	91.88	17.05	M	N/A	N/A	N/A	N/A	N/A	N/A
chr1	158603272	158603694	423	186	158603458	46	408.54	44.74	V	N/A	N/A	N/A	N/A	N/A	N/A
chr1	158914115	158914649	535	222	158914337	25	172.49	33.99	D	chr1	158914318	158914461	MLT1J2	LTR	MaLR
chr1	159146539	159147062	524	209	159146748	54	693.29	154.57	J	chr1	159146314	159146948	LTR12_	LTR	ERV1
chr1	159256984	159258178	1195	635	159257619	495	3100	139.11	N	N/A	N/A	N/A	N/A	N/A	N/A
chr1	159281308	159281819	512	274	159281582	20	95.38	13.19	V	N/A	N/A	N/A	N/A	N/A	N/A
chr1	159395872	159396596	725	409	159396281	159	1452.67	80.41	P	N/A	N/A	N/A	N/A	N/A	N/A
chr1	159402187	159403085	899	591	159402778	180	1383.32	67.47	N	N/A	N/A	N/A	N/A	N/A	N/A
chr1	159421757	159422215	459	222	159421979	22	158.91	29.44	T	N/A	N/A	N/A	N/A	N/A	N/A
chr1	159435369	159435792	424	138	159435507	31	203.6	28.4	R	N/A	N/A	N/A	N/A	N/A	N/A
chr1	159461856	159462651	796	378	159462234	166	1673.19	111.29	S	N/A	N/A	N/A	N/A	N/A	N/A
chr1	159494927	159495333	407	108	159495035	23	253.46	61.29	D	N/A	N/A	N/A	N/A	N/A	N/A
chr1	159604020	159604543	524	311	159604331	37	292.71	46.69	D	N/A	N/A	N/A	N/A	N/A	N/A
chr1	159741520	159742070	551	245	159741765	45	337.07	46.37	K	N/A	N/A	N/A	N/A	N/A	N/A
chr1	160670075	160670435	361	240	160670315	14	126.79	30.64	J	chr1	160669385	160670862	LTR12C	LTR	ERV1
chr1	160733928	160734427	500	326	160734254	27	129.24	17.48	S	N/A	N/A	N/A	N/A	N/A	N/A
chr1	160797478	160798221	744	339	160797817	51	294.82	31.94	P	N/A	N/A	N/A	N/A	N/A	N/A
chr1	161558100	161558638	539	245	161558345	52	325.64	35.12	S	N/A	N/A	N/A	N/A	N/A	N/A
chr1	162794484	162795215	732	333	162794817	136	1643.36	152.73	J	N/A	N/A	N/A	N/A	N/A	N/A
chr1	162939351	162939748	398	179	162939530	21	96.32	12.82	T	N/A	N/A	N/A	N/A	N/A	N/A
chr1	163833825	163834535	711	379	163834204	120	922.17	48.61	T	N/A	N/A	N/A	N/A	N/A	N/A
chr1	163834994	163835390	397	169	163835163	22	128.73	15.91	U	N/A	N/A	N/A	N/A	N/A	N/A
chr1	163881769	163882155	387	245	163882014	22	146.7	17.63	T	N/A	N/A	N/A	N/A	N/A	N/A
chr1	164063131	164063686	556	292	164063423	82	807.58	90.3	S	N/A	N/A	N/A	N/A	N/A	N/A
chr1	164160492	164160990	499	199	164160691	114	1308.2	123.41	J	N/A	N/A	N/A	N/A	N/A	N/A
chr1	164578031	164578567	537	91	164578122	24	239.03	45.97	J	chr1	164577788	164579457	LTR12C	LTR	ERV1
chr1	164726104	164726594	491	202	164726306	21	130.16	22.26	U	N/A	N/A	N/A	N/A	N/A	N/A
chr1	164936478	164936883	406	242	164936720	15	90.42	19.57	R	N/A	N/A	N/A	N/A	N/A	N/A
chr1	165113885	165114163	279	168	165114053	17	148.66	31.23	E	chr1	165114051	165114975	LTR12	LTR	ERV1
chr1	165114499	165114802	304	139	165114638	36	376.87	59.6	E	chr1	165114051	165114975	LTR12	LTR	ERV1
chr1	165224701	165225293	593	328	165225029	67	720.47	103.47	D	N/A	N/A	N/A	N/A	N/A	N/A
chr1	165787711	165788244	534	238	165787949	23	102.66	20.61	L	chr1	165787693	165787974	MER102b	DNA	MER1_type
chr1	165789414	165790033	620	291	165789705	56	369.14	38.16	N	N/A	N/A	N/A	N/A	N/A	N/A
chr1	165957406	165958566	1161	378	165957784	308	3100	183.88	S	N/A	N/A	N/A	N/A	N/A	N/A
chr1	166135194	166135596	403	257	166135451	33	223.86	24.92	D	N/A	N/A	N/A	N/A	N/A	N/A
chr1	166149765	166150331	567	287	166150052	26	147.68	20.34	M	N/A	N/A	N/A	N/A	N/A	N/A
chr1	166171729	166172362	634	304	166172033	56	278.29	27.69	L	N/A	N/A	N/A	N/A	N/A	N/A
chr1	166461682	166462105	424	151	166461833	21	103.11	14.86	S	N/A	N/A	N/A	N/A	N/A	N/A
chr1	166516528	166516827	300	159	166516687	28	216.73	25.76	D	N/A	N/A	N/A	N/A	N/A	N/A
chr1	166553292	166553691	400	115	166553407	17	100.95	18.61	D	chr1	166553136	166553437	LTR8A	LTR	ERV1
chr1	166622355	166622832	478	191	166622546	31	244.25	35.59	D	chr1	166622502	166622585	MLT1J2	LTR	MaLR
chr1	167341812	167342405	594	279	167342091	65	531.39	56.5	T	N/A	N/A	N/A	N/A	N/A	N/A
chr1	167603310	167604458	1149	389	167603699	191	1533.67	84.53	S	N/A	N/A	N/A	N/A	N/A	N/A
chr1	167721667	167722312	646	231	167721898	231	2378.84	96.65	N	N/A	N/A	N/A	N/A	N/A	N/A
chr1	168129516	168130544	1029	586	168130102	196	1964.73	104.17	B	N/A	N/A	N/A	N/A	N/A	N/A
chr1	168312631	168313338	708	337	168312968	61	596.67	85.14	E	chr1	168312690	168313008	LTR12	LTR	ERV1
chr1	168767538	168768205	668	339	168767877	106	1067.78	97.96	V	N/A	N/A	N/A	N/A	N/A	N/A
chr1	169549579	169550007	429	314	169549893	21	129.67	24.87	D	N/A	N/A	N/A	N/A	N/A	N/A
chr1	169616604	169617457	854	396	169617000	69	817.95	164.71	J	chr1	169616643	169618006	LTR12C	LTR	ERV1
chr1	169626541	169626970	430	106	169626647	36	417.61	67.62	J	chr1	169626242	169626877	LTR12_	LTR	ERV1
chr1	170016739	170017972	1234	632	170017371	365	3100	98.54	S	N/A	N/A	N/A	N/A	N/A	N/A
chr1	170767727	170769310	1584	510	170768237	307	2351.08	76.66	P	N/A	N/A	N/A	N/A	N/A	N/A
chr1	171606525	171606827	303	113	171606638	11	110.75	38.31	T	chr1	171604172	171610546	HERV9	LTR	ERV1
chr1	171650691	171650989	299	141	171650832	25	184.19	23.52	D	chr1	171650615	171650979	MER31B	LTR	ERV1
chr1	171712622	171712955	334	219	171712841	62	580.84	52.44	P	N/A	N/A	N/A	N/A	N/A	N/A
chr1	171789863	171790265	403	173	171790036	103	1192.9	90.16	J	chr1	171789858	171790350	MLT1J	LTR	MaLR
chr1	171838529	171839034	506	362	171838891	94	1048.41	102.83	T	N/A	N/A	N/A	N/A	N/A	N/A
chr1	172059957	172060772	816	382	172060339	155	1251.56	66.84	K	N/A	N/A	N/A	N/A	N/A	N/A
chr1	172103550	172104181	632	409	172103959	28	93.52	10.61	L	N/A	N/A	N/A	N/A	N/A	N/A
chr1	172291499	172291843	345	249	172291748	29	363.71	107.25	J	chr1	172291293	172292693	LTR12C	LTR	ERV1
chr1	172593818	172594373	556	287	172594105	42	352.45	54.96	J	chr1	172593869	172594443	MER101B	LTR	ERV1
chr1	172947831	172948032	202	102	172947933	20	302.31	72.57	J	chr1	172947154	172948401	LTR12C	LTR	ERV1
chr1	173226174	173226629	456	117	173226291	45	396.87	54.33	D	N/A	N/A	N/A	N/A	N/A	N/A
chr1	173258953	173259720	768	435	173259388	39	128.65	14.31	B	N/A	N/A	N/A	N/A	N/A	N/A
chr1	173365910	173366395	486	213	173366123	36	252.18	31.89	J	N/A	N/A	N/A	N/A	N/A	N/A
chr1	173404429	173404922	494	249	173404678	26	165.31	29.4	D	chr1	173404554	173404904	MLT1J2	LTR	MaLR
chr1	174953318	174953734	417	310	174953628	21	209.25	56.15	D	chr1	174953452	174954854	L1MDa	LINE	L1
chr1	175089276	175089640	365	108	175089384	20	110.99	15.67	T	N/A	N/A	N/A	N/A	N/A	N/A
chr1	175406341	175406927	587	291	175406632	24	207.01	46	D	N/A	N/A	N/A	N/A	N/A	N/A
chr1	176961921	176962323	403	220	176962141	19	114.65	20.34	T	N/A	N/A	N/A	N/A	N/A	N/A
chr1	177211147	177211389	243	146	177211293	13	134.13	35.13	J	chr1	177210752	177211297	L1M	LINE	L1
chr1	177261250	177261740	491	346	177261596	32	205.88	21.9	P	N/A	N/A	N/A	N/A	N/A	N/A
chr1	177317292	177318089	798	483	177317775	114	861.78	51.52	S	N/A	N/A	N/A	N/A	N/A	N/A
chr1	177494198	177494461	264	114	177494312	13	99.06	20.61	D	chr1	177494183	177494420	MLT1H	LTR	MaLR
chr1	177529123	177529727	605	373	177529496	73	566.52	43.83	V	N/A	N/A	N/A	N/A	N/A	N/A
chr1	178010554	178011239	686	329	178010883	82	847.77	80.96	J	chr1	178010661	178011302	MER51A	LTR	ERV1
chr1	178189976	178190577	602	306	178190282	58	317.05	27.65	S	N/A	N/A	N/A	N/A	N/A	N/A
chr1	178448973	178449772	800	398	178449371	249	2917.03	165.9	T	N/A	N/A	N/A	N/A	N/A	N/A
chr1	178477700	178478025	326	215	178477915	19	148.1	26.87	A	N/A	N/A	N/A	N/A	N/A	N/A
chr1	178744643	178745346	704	476	178745119	46	408.81	40.68	J	chr1	178744190	178745572	LTR12C	LTR	ERV1
chr1	178845377	178845911	535	253	178845630	91	699.61	40.66	S	chr1	178845489	178845748	MLT1I	LTR	MaLR
chr1	178846985	178847534	550	221	178847206	37	165.21	21.25	U	N/A	N/A	N/A	N/A	N/A	N/A
chr1	178863223	178863546	324	112	178863335	18	112.11	16.69	R	N/A	N/A	N/A	N/A	N/A	N/A
chr1	178961739	178962078	340	108	178961847	12	115.36	33.12	M	chr1	178961767	178962268	LTR12	LTR	ERV1
chr1	179151336	179151558	223	112	179151448	14	105.04	20.04	D	chr1	179151403	179151771	MER1B	DNA	MER1_type
chr1	179258351	179259031	681	341	179258692	50	334.97	41.74	B	N/A	N/A	N/A	N/A	N/A	N/A
chr1	179269320	179269963	644	377	179269697	170	1641.07	89.8	S	N/A	N/A	N/A	N/A	N/A	N/A
chr1	179274111	179274495	385	191	179274302	87	672.12	40.72	E	N/A	N/A	N/A	N/A	N/A	N/A
chr1	179306234	179306889	656	354	179306588	170	2157.59	190.5	J	chr1	179306521	179306910	MLT1L	LTR	MaLR
chr1	179323915	179324709	795	471	179324386	187	1669.49	73.8	P	N/A	N/A	N/A	N/A	N/A	N/A
chr1	179348647	179349185	539	217	179348864	49	272.74	22.73	T	N/A	N/A	N/A	N/A	N/A	N/A
chr1	179599578	179599992	415	289	179599867	26	219.78	40.98	D	chr1	179599814	179600224	L2	LINE	L2
chr1	180265097	180265731	635	476	180265573	38	248.51	21.81	T	N/A	N/A	N/A	N/A	N/A	N/A
chr1	180569971	180570454	484	196	180570167	21	103.29	19.27	R	N/A	N/A	N/A	N/A	N/A	N/A
chr1	180627108	180628050	943	521	180627629	272	3077.65	160.25	N	N/A	N/A	N/A	N/A	N/A	N/A
chr1	180839848	180840692	845	383	180840231	111	1026.8	93.55	T	N/A	N/A	N/A	N/A	N/A	N/A
chr1	181188719	181189116	398	212	181188931	25	264.6	61.68	D	N/A	N/A	N/A	N/A	N/A	N/A
chr1	181707221	181707907	687	397	181707618	128	977.09	46.77	P	N/A	N/A	N/A	N/A	N/A	N/A
chr1	182455778	182456131	354	193	182455971	16	131.81	27.6	D	N/A	N/A	N/A	N/A	N/A	N/A
chr1	182990336	182991493	1158	384	182990720	389	3100	145.98	N	N/A	N/A	N/A	N/A	N/A	N/A
chr1	183300640	183301258	619	487	183301127	49	475.41	50.15	G	chr1	183300766	183301557	LTR12	LTR	ERV1
chr1	183392371	183393141	771	383	183392754	98	736.74	56.85	B	N/A	N/A	N/A	N/A	N/A	N/A
chr1	183520114	183520973	860	304	183520418	59	418.8	44.37	V	chr1	183520225	183520652	LTR56	LTR	ERV1
chr1	183551603	183552358	756	425	183552028	206	1962.44	82.85	L	N/A	N/A	N/A	N/A	N/A	N/A
chr1	183553708	183554190	483	281	183553989	28	123.2	12.44	N	N/A	N/A	N/A	N/A	N/A	N/A
chr1	183556922	183557093	172	87	183557009	33	533.38	51.52	E	chr1	183556672	183558002	LTR12C	LTR	ERV1
chr1	183969787	183970305	519	300	183970087	47	402.81	54.55	T	N/A	N/A	N/A	N/A	N/A	N/A
chr1	184610055	184610507	453	155	184610210	43	261.58	28.01	K	N/A	N/A	N/A	N/A	N/A	N/A
chr1	185653331	185653696	366	126	185653457	21	218.86	61.18	D	chr1	185653408	185653620	MLT1H	LTR	MaLR
chr1	185711321	185711666	346	137	185711458	17	151.78	32.83	D	chr1	185711397	185711618	MLT1K	LTR	MaLR
chr1	189133106	189133356	251	116	189133222	14	144.05	37.21	D	chr1	189133128	189133252	MLT1H	LTR	MaLR
chr1	189555871	189556217	347	213	189556084	11	104.07	30.64	D	N/A	N/A	N/A	N/A	N/A	N/A
chr1	190987560	190987949	390	164	190987724	24	254.24	70.84	J	chr1	190987101	190988130	LTR12D	LTR	ERV1
chr1	191044492	191045038	547	226	191044718	31	170.06	22.54	T	N/A	N/A	N/A	N/A	N/A	N/A
chr1	191131256	191131792	537	424	191131680	29	287.72	45.65	J	chr1	191130946	191131729	LTR12	LTR	ERV1
chr1	191147092	191147668	577	273	191147365	20	151.48	37.96	J	N/A	N/A	N/A	N/A	N/A	N/A
chr1	191198998	191199333	336	169	191199167	17	155.4	25.76	D	chr1	191198998	191199358	MER93a	LTR	ERV1
chr1	192593558	192593954	397	284	192593842	43	574.35	157.05	U	chr1	192593395	192594587	LTR12C	LTR	ERV1
chr1	192666443	192666723	281	125	192666568	16	183.75	49.8	J	chr1	192666141	192667284	LTR12D	LTR	ERV1
chr1	192852864	192853072	209	105	192852969	25	383.36	88.22	J	chr1	192852499	192853464	LTR12	LTR	ERV1
chr1	193095105	193095575	471	298	193095403	17	156.79	51.52	K	chr1	193094635	193095999	LTR12C	LTR	ERV1
chr1	193377418	193377622	205	103	193377521	19	291.21	72.78	D	chr1	193377300	193377530	LTR12B	LTR	ERV1
chr1	194758233	194758584	352	103	194758336	10	91.43	22.98	J	chr1	194758329	194759145	LTR12	LTR	ERV1
chr1	194887584	194887922	339	117	194887701	34	330.22	48.09	S	N/A	N/A	N/A	N/A	N/A	N/A
chr1	195304962	195305424	463	219	195305181	14	124.28	34.47	J	chr1	195304742	195305406	LTR12_	LTR	ERV1
chr1	195381786	195382995	1210	701	195382487	487	3100	193.26	B	N/A	N/A	N/A	N/A	N/A	N/A
chr1	195590316	195590794	479	165	195590481	24	220.76	42.94	J	chr1	195590092	195591710	LTR12C	LTR	ERV1
chr1	195925804	195926200	397	249	195926053	30	206.49	29.55	D	N/A	N/A	N/A	N/A	N/A	N/A
chr1	196371983	196372408	426	132	196372115	27	189.13	24.69	D	chr1	196371730	196372517	L2	LINE	L2
chr1	196392801	196393850	1050	614	196393415	213	2220.81	132.29	P	N/A	N/A	N/A	N/A	N/A	N/A
chr1	196394521	196395183	663	386	196394907	107	1055.27	96.6	K	N/A	N/A	N/A	N/A	N/A	N/A
chr1	196640252	196641036	785	200	196640452	53	504.04	61.83	J	chr1	196640420	196641161	LTR12	LTR	ERV1
chr1	198195368	198195712	345	103	198195471	11	97.11	26.42	D	chr1	198195243	198196478	LTR12C	LTR	ERV1
chr1	198661930	198662461	532	254	198662184	32	162.41	21.01	J	chr1	198661954	198662187	MLT1K	LTR	MaLR
chr1	198855961	198856863	903	561	198856522	381	3100	135.25	B	N/A	N/A	N/A	N/A	N/A	N/A
chr1	198898858	198899202	345	180	198899038	18	160.48	36.11	D	N/A	N/A	N/A	N/A	N/A	N/A
chr1	198905066	198905633	568	126	198905192	31	167.08	17.56	S	N/A	N/A	N/A	N/A	N/A	N/A
chr1	199250137	199250655	519	306	199250443	64	472.12	39.5	R	N/A	N/A	N/A	N/A	N/A	N/A
chr1	199255016	199255568	553	345	199255361	49	347.54	39.13	E	N/A	N/A	N/A	N/A	N/A	N/A
chr1	199259268	199259679	412	242	199259510	24	123.03	18.27	E	chr1	199259468	199259541	GC_rich	Low_complexity	Low_complexity
chr1	199264151	199264696	546	293	199264444	84	892.75	102.74	D	chr1	199264312	199264475	MLT1I	LTR	MaLR
chr1	199389714	199390690	977	543	199390257	272	3151.24	183.69	U	N/A	N/A	N/A	N/A	N/A	N/A
chr1	199406316	199406948	633	301	199406617	46	174.93	16.8	V	N/A	N/A	N/A	N/A	N/A	N/A
chr1	199689830	199690264	435	149	199689979	46	465.28	70.94	D	chr1	199689874	199690093	MLT1F2	LTR	MaLR
chr1	199954428	199955063	636	330	199954758	70	522.72	52.51	J	N/A	N/A	N/A	N/A	N/A	N/A
chr1	200181893	200182729	837	465	200182358	167	1548.54	98.6	U	N/A	N/A	N/A	N/A	N/A	N/A
chr1	200190932	200191627	696	243	200191175	222	2449.97	93.92	S	N/A	N/A	N/A	N/A	N/A	N/A
chr1	200296846	200297226	381	100	200296946	15	129.99	37.21	D	chr1	200296913	200297062	L1MC3	LINE	L1
chr1	200303037	200303423	387	204	200303241	26	163.05	17.17	J	chr1	200302969	200303364	LTR16A	LTR	ERVL
chr1	200329728	200330009	282	110	200329838	18	124.47	15.95	D	chr1	200329401	200330028	L2	LINE	L2
chr1	200341498	200341890	393	228	200341726	40	251.56	22.73	T	N/A	N/A	N/A	N/A	N/A	N/A
chr1	200344106	200344629	524	279	200344385	50	384.54	46.84	E	N/A	N/A	N/A	N/A	N/A	N/A
chr1	200394910	200395524	615	337	200395247	42	139.69	15.46	P	N/A	N/A	N/A	N/A	N/A	N/A
chr1	200470923	200471269	347	109	200471032	15	103.34	17.17	A	chr1	200470787	200471231	FordPrefect_a	DNA	Tip100
chr1	200555532	200556083	552	274	200555806	21	129.67	23.11	D	N/A	N/A	N/A	N/A	N/A	N/A
chr1	200577374	200578227	854	412	200577786	324	3100	115.25	B	N/A	N/A	N/A	N/A	N/A	N/A
chr1	200680614	200681184	571	333	200680947	30	221.07	34.96	J	N/A	N/A	N/A	N/A	N/A	N/A
chr1	200891750	200892089	340	235	200891985	16	110.42	19.32	A	N/A	N/A	N/A	N/A	N/A	N/A
chr1	201046215	201046960	746	409	201046624	125	963.9	60.11	N	N/A	N/A	N/A	N/A	N/A	N/A
chr1	201096572	201098027	1456	871	201097443	443	3100	130.13	T	N/A	N/A	N/A	N/A	N/A	N/A
chr1	201193820	201194442	623	290	201194110	31	154.47	20.39	B	N/A	N/A	N/A	N/A	N/A	N/A
chr1	201242557	201243783	1227	490	201243047	355	3100	206.09	K	N/A	N/A	N/A	N/A	N/A	N/A
chr1	201506766	201507181	416	199	201506965	38	232.74	24.15	T	chr1	201506848	201507087	MLT1J	LTR	MaLR
chr1	201540904	201541581	678	323	201541227	33	139.8	16.33	K	N/A	N/A	N/A	N/A	N/A	N/A
chr1	201562849	201563603	755	367	201563216	154	1444.18	101.27	T	N/A	N/A	N/A	N/A	N/A	N/A
chr1	201740297	201740672	376	240	201740537	26	127.45	13.98	A	N/A	N/A	N/A	N/A	N/A	N/A
chr1	201807833	201808415	583	276	201808109	36	256.49	42.43	A	N/A	N/A	N/A	N/A	N/A	N/A
chr1	201970902	201971159	258	103	201971005	14	116.14	24.27	D	N/A	N/A	N/A	N/A	N/A	N/A
chr1	202136365	202136981	617	417	202136782	47	545.47	121.45	J	chr1	202135802	202137114	LTR12C	LTR	ERV1
chr1	202523994	202524513	520	200	202524194	38	305.47	41.86	A	chr1	202524194	202524304	L3	LINE	CR1
chr1	202647361	202648006	646	345	202647706	60	368.05	29.96	N	N/A	N/A	N/A	N/A	N/A	N/A
chr1	202729492	202730022	531	268	202729760	22	110.23	20.85	T	N/A	N/A	N/A	N/A	N/A	N/A
chr1	202799042	202799487	446	286	202799328	19	106.94	21.69	D	chr1	202799298	202799576	MLT1I	LTR	MaLR
chr1	202801499	202801889	391	190	202801689	33	199.68	20.98	T	N/A	N/A	N/A	N/A	N/A	N/A
chr1	203463098	203463873	776	521	203463619	244	3070.75	196.34	T	N/A	N/A	N/A	N/A	N/A	N/A
chr1	203491581	203492126	546	346	203491927	62	429.07	21.61	T	N/A	N/A	N/A	N/A	N/A	N/A
chr1	203557085	203557999	915	450	203557535	172	1754.73	114.32	T	N/A	N/A	N/A	N/A	N/A	N/A
chr1	203685871	203686323	453	133	203686004	26	179.17	26.35	U	N/A	N/A	N/A	N/A	N/A	N/A
chr1	203985658	203986655	998	369	203986027	183	1954.07	120.67	N	N/A	N/A	N/A	N/A	N/A	N/A
chr1	203987084	203987444	361	154	203987238	26	207.35	33.34	N	N/A	N/A	N/A	N/A	N/A	N/A
chr1	204010120	204010550	431	116	204010236	23	111.46	17.48	V	N/A	N/A	N/A	N/A	N/A	N/A
chr1	204048242	204049486	1245	779	204049021	274	2800.72	162.05	B	N/A	N/A	N/A	N/A	N/A	N/A
chr1	204085592	204086296	705	409	204086001	65	587.18	68.7	J	N/A	N/A	N/A	N/A	N/A	N/A
chr1	204179035	204179538	504	238	204179273	58	601.19	102.67	D	N/A	N/A	N/A	N/A	N/A	N/A
chr1	204304751	204305017	267	164	204304915	14	158.39	45.97	F	N/A	N/A	N/A	N/A	N/A	N/A
chr1	204791781	204792300	520	298	204792079	41	230.99	19.94	R	N/A	N/A	N/A	N/A	N/A	N/A
chr1	204802809	204803563	755	304	204803113	345	3100	140.26	E	chr1	204803052	204803243	MLT1J2	LTR	MaLR
chr1	204871038	204871476	439	227	204871265	20	105.44	14.05	R	chr1	204870985	204871416	MLT1H	LTR	MaLR
chr1	204908826	204909208	383	201	204909027	42	339.87	30.83	R	N/A	N/A	N/A	N/A	N/A	N/A
chr1	204966341	204966708	368	110	204966451	35	231.09	26.72	G	N/A	N/A	N/A	N/A	N/A	N/A
chr1	205255658	205256080	423	254	205255912	24	131.83	17.52	R	chr1	205255809	205256159	L2	LINE	L2
chr1	205264272	205265220	949	674	205264946	80	390.92	25.08	L	N/A	N/A	N/A	N/A	N/A	N/A
chr1	205272523	205273106	584	309	205272832	83	700.13	61.95	N	N/A	N/A	N/A	N/A	N/A	N/A
chr1	205292901	205293417	517	243	205293144	56	327.84	25.1	N	N/A	N/A	N/A	N/A	N/A	N/A
chr1	205736030	205736292	263	112	205736142	14	121.95	27.23	T	N/A	N/A	N/A	N/A	N/A	N/A
chr1	205759536	205760143	608	287	205759823	129	2041.23	268.14	K	chr1	205759599	205759987	MER57A	LTR	ERV1
chr1	205760376	205760606	231	116	205760492	15	154.72	48.3	U	chr1	205760059	205760506	MER54A	LTR	ERVL
chr1	205884694	205885341	648	332	205885026	87	775.26	80.8	P	N/A	N/A	N/A	N/A	N/A	N/A
chr1	205931862	205932217	356	192	205932054	17	142.62	34.39	V	chr1	205931789	205932182	MER57A	LTR	ERV1
chr1	205986343	205986768	426	111	205986454	31	315.74	57.89	P	chr1	205985167	205987877	HUERS-P3b	LTR	ERV1
chr1	205988067	205988352	286	172	205988239	21	204.37	36.5	P	chr1	205987887	205988522	LTR9B	LTR	ERV1
chr1	205991680	205992399	720	276	205991956	202	2354.4	114.25	L	N/A	N/A	N/A	N/A	N/A	N/A
chr1	206053832	206054319	488	260	206054092	43	286.17	34.81	R	N/A	N/A	N/A	N/A	N/A	N/A
chr1	206062378	206063015	638	416	206062794	183	1921.56	107.2	R	N/A	N/A	N/A	N/A	N/A	N/A
chr1	206068314	206068904	591	339	206068653	43	251.09	23.85	E	N/A	N/A	N/A	N/A	N/A	N/A
chr1	207922606	207922884	279	110	207922716	13	98.5	19.77	D	N/A	N/A	N/A	N/A	N/A	N/A
chr1	208045947	208046443	497	239	208046186	59	462.31	45.58	T	N/A	N/A	N/A	N/A	N/A	N/A
chr1	208097902	208098326	425	215	208098117	45	497.83	88.19	J	chr1	208097824	208099169	LTR12C	LTR	ERV1
chr1	208128332	208128839	508	251	208128583	33	338.4	80.88	J	chr1	208128215	208129472	LTR12C	LTR	ERV1
chr1	208138341	208138565	225	113	208138454	22	265.55	55.56	J	chr1	208137944	208139334	LTR12C	LTR	ERV1
chr1	208329801	208330200	400	144	208329945	19	184.45	48.3	J	chr1	208329692	208330235	MER51A	LTR	ERV1
chr1	208476618	208476845	228	115	208476733	13	140.88	41.86	D	N/A	N/A	N/A	N/A	N/A	N/A
chr1	209460823	209461159	337	242	209461065	13	130.76	42.14	J	chr1	209461049	209461737	LTR12_	LTR	ERV1
chr1	209499627	209500145	519	277	209499904	19	91.87	19.32	K	chr1	209499839	209499911	C-rich	Low_complexity	Low_complexity
chr1	209500550	209501109	560	381	209500931	64	407.61	32.46	N	N/A	N/A	N/A	N/A	N/A	N/A
chr1	209585711	209585912	202	102	209585813	17	155.33	19.91	D	chr1	209585709	209585974	LTR33A	LTR	ERVL
chr1	209712630	209713082	453	189	209712819	22	151.14	20.01	D	chr1	209712575	209712945	MLT1J2	LTR	MaLR
chr1	209799680	209800199	520	218	209799898	27	160.49	28.34	E	N/A	N/A	N/A	N/A	N/A	N/A
chr1	209818844	209820082	1239	427	209819271	160	1331.92	102.16	N	N/A	N/A	N/A	N/A	N/A	N/A
chr1	209845942	209846758	817	619	209846561	91	592.83	44.52	K	N/A	N/A	N/A	N/A	N/A	N/A
chr1	209870038	209870588	551	279	209870317	30	103.89	9.68	V	N/A	N/A	N/A	N/A	N/A	N/A
chr1	209915219	209916116	898	432	209915651	162	1483.21	90.64	B	N/A	N/A	N/A	N/A	N/A	N/A
chr1	209966224	209966706	483	388	209966612	34	265.03	34.14	E	chr1	209966292	209966772	MLT1K	LTR	MaLR
chr1	210130156	210130395	240	114	210130270	28	355.16	73.6	J	chr1	210129329	210130683	LTR12C	LTR	ERV1
chr1	210275269	210276067	799	391	210275660	79	425.26	31.86	L	N/A	N/A	N/A	N/A	N/A	N/A
chr1	210524247	210525581	1335	933	210525180	399	3100	93.06	P	N/A	N/A	N/A	N/A	N/A	N/A
chr1	211097779	211098386	608	363	211098142	78	593.94	51.52	P	N/A	N/A	N/A	N/A	N/A	N/A
chr1	211190115	211190821	707	369	211190484	85	719.04	57.38	A	N/A	N/A	N/A	N/A	N/A	N/A
chr1	211346266	211346578	313	183	211346449	17	142.62	26.21	M	chr1	211346394	211346495	MLT1L	LTR	MaLR
chr1	211364593	211365030	438	173	211364766	53	499.8	42.31	G	N/A	N/A	N/A	N/A	N/A	N/A
chr1	211500590	211501010	421	171	211500761	36	296.41	42.94	T	N/A	N/A	N/A	N/A	N/A	N/A
chr1	211775617	211776038	422	193	211775810	77	1010.5	124.21	J	chr1	211775578	211775992	MLT1L	LTR	MaLR
chr1	211924245	211924852	608	399	211924644	77	867.02	120.22	J	chr1	211924463	211924991	MLT1K	LTR	MaLR
chr1	211968493	211968854	362	169	211968662	27	176.17	16.58	D	N/A	N/A	N/A	N/A	N/A	N/A
chr1	212515734	212516066	333	256	212515990	14	109.69	21.65	J	chr1	212515219	212516012	LTR12	LTR	ERV1
chr1	212774723	212775045	323	172	212774895	17	126.52	21.63	D	N/A	N/A	N/A	N/A	N/A	N/A
chr1	212842666	212843578	913	442	212843108	312	3100	256.1	S	N/A	N/A	N/A	N/A	N/A	N/A
chr1	213634224	213634824	601	161	213634385	40	451.6	91.93	J	chr1	213633947	213634929	LTR12D	LTR	ERV1
chr1	215586587	215586860	274	161	215586748	21	257.91	73.6	D	chr1	215586637	215587059	MLT1J2	LTR	MaLR
chr1	217387496	217387935	440	281	217387777	41	197	15.3	T	N/A	N/A	N/A	N/A	N/A	N/A
chr1	217467821	217468502	682	366	217468187	86	972.02	122.98	J	chr1	217467794	217468358	MLT1L	LTR	MaLR
chr1	218023750	218024135	386	203	218023953	25	217.75	40.32	D	N/A	N/A	N/A	N/A	N/A	N/A
chr1	218144770	218145277	508	334	218145104	51	391.32	43.31	R	chr1	218144814	218145143	MER90a	LTR	ERV1
chr1	218333413	218334221	809	582	218333995	42	239.52	27.05	V	N/A	N/A	N/A	N/A	N/A	N/A
chr1	218544106	218544318	213	107	218544213	14	130.93	25.4	E	chr1	218543804	218545350	L1MEc	LINE	L1
chr1	218608534	218608945	412	296	218608830	17	121.62	19.82	D	N/A	N/A	N/A	N/A	N/A	N/A
chr1	218714959	218715331	373	257	218715216	35	427.89	92.48	J	chr1	218714815	218716224	LTR12C	LTR	ERV1
chr1	219119001	219119516	516	283	219119284	48	455.46	73.6	T	N/A	N/A	N/A	N/A	N/A	N/A
chr1	219271475	219271781	307	117	219271592	15	115.44	25.76	R	N/A	N/A	N/A	N/A	N/A	N/A
chr1	219473927	219474175	249	95	219474022	12	127.66	37.29	J	chr1	219473590	219474321	LTR12D	LTR	ERV1
chr1	219816296	219816662	367	118	219816414	58	760.42	136.53	D	chr1	219816254	219816623	MER57A	LTR	ERV1
chr1	219858483	219858861	379	159	219858642	15	131.05	28.95	D	chr1	219858431	219858884	MER101	LTR	ERV1
chr1	219981823	219982761	939	327	219982150	451	3100	181.32	B	N/A	N/A	N/A	N/A	N/A	N/A
chr1	220784994	220785419	426	163	220785157	16	99.8	22.33	D	N/A	N/A	N/A	N/A	N/A	N/A
chr1	220829628	220830335	708	295	220829923	34	109.99	11.14	B	N/A	N/A	N/A	N/A	N/A	N/A
chr1	220857269	220857867	599	365	220857634	143	1660.88	118.3	S	N/A	N/A	N/A	N/A	N/A	N/A
chr1	220883876	220884501	626	359	220884235	52	268.43	20.75	V	N/A	N/A	N/A	N/A	N/A	N/A
chr1	220952857	220953410	554	294	220953151	43	213.97	22.18	N	N/A	N/A	N/A	N/A	N/A	N/A
chr1	221604372	221604701	330	117	221604489	18	167.66	37.88	D	N/A	N/A	N/A	N/A	N/A	N/A
chr1	222246833	222247158	326	175	222247008	25	306.9	76.61	K	N/A	N/A	N/A	N/A	N/A	N/A
chr1	222459067	222459404	338	175	222459242	21	90.01	12.73	T	N/A	N/A	N/A	N/A	N/A	N/A
chr1	222584459	222585018	560	272	222584731	45	249.48	23.35	B	N/A	N/A	N/A	N/A	N/A	N/A
chr1	222606066	222606331	266	176	222606242	10	102.9	33.6	J	chr1	222605981	222607384	LTR12C	LTR	ERV1
chr1	222610979	222611501	523	222	222611201	44	271.23	30.54	S	N/A	N/A	N/A	N/A	N/A	N/A
chr1	222797229	222797611	383	107	222797336	18	102.05	15.95	D	chr1	222797175	222797934	MER21C	LTR	ERV1
chr1	223052253	223052738	486	336	223052589	23	206.82	48.66	D	chr1	223052354	223052834	MLT1K	LTR	MaLR
chr1	223476718	223477125	408	291	223477009	23	253.21	61.29	J	chr1	223476656	223477085	LTR12B	LTR	ERV1
chr1	223682004	223683138	1135	514	223682518	321	3100	131.58	N	N/A	N/A	N/A	N/A	N/A	N/A
chr1	223686472	223687095	624	294	223686766	72	723.92	111.16	E	chr1	223685507	223687069	LTR12C	LTR	ERV1
chr1	223917708	223918094	387	147	223917855	16	103.94	19.94	A	chr1	223917568	223917928	MLT1K	LTR	MaLR
chr1	224023325	224023674	350	125	224023450	20	95.38	13.11	J	N/A	N/A	N/A	N/A	N/A	N/A
chr1	224031782	224032465	684	304	224032086	199	1973.99	100.9	S	N/A	N/A	N/A	N/A	N/A	N/A
chr1	224178281	224179038	758	388	224178669	151	1495.38	91.71	P	N/A	N/A	N/A	N/A	N/A	N/A
chr1	224225003	224225217	215	108	224225111	18	205.78	44.59	J	chr1	224223909	224225541	LTR12C	LTR	ERV1
chr1	224256962	224257716	755	285	224257247	202	1549.75	49.26	N	N/A	N/A	N/A	N/A	N/A	N/A
chr1	224316690	224317384	695	310	224317000	77	645.4	68.12	P	chr1	224316981	224317008	GC_rich	Low_complexity	Low_complexity
chr1	224320857	224321490	634	323	224321180	43	259.15	23.61	F	N/A	N/A	N/A	N/A	N/A	N/A
chr1	224575192	224575901	710	290	224575482	173	2563.87	276.4	J	chr1	224575272	224575827	LTR12_	LTR	ERV1
chr1	224680163	224680466	304	114	224680277	26	259.48	47.02	J	chr1	224679900	224681180	LTR12C	LTR	ERV1
chr1	224704077	224704666	590	274	224704351	75	679.1	68.4	A	chr1	224704171	224704374	MLT1K	LTR	MaLR
chr1	224719005	224719305	301	112	224719117	55	746.75	132.79	J	chr1	224718347	224719458	LTR12D	LTR	ERV1
chr1	224808222	224808779	558	210	224808432	182	2435.24	205.56	A	chr1	224808349	224808679	MLT1I	LTR	MaLR
chr1	225163221	225163631	411	203	225163424	66	758.6	93.53	D	chr1	225163123	225163494	MLT1L	LTR	MaLR
chr1	225193713	225195246	1534	765	225194478	519	3100	169.53	K	N/A	N/A	N/A	N/A	N/A	N/A
chr1	225514595	225515335	741	250	225514845	105	990.69	77.63	G	N/A	N/A	N/A	N/A	N/A	N/A
chr1	225527972	225528328	357	261	225528233	16	99.44	20.04	G	N/A	N/A	N/A	N/A	N/A	N/A
chr1	225578261	225578613	353	161	225578422	83	936.98	76.11	J	chr1	225578078	225578633	MLT1G	LTR	MaLR
chr1	225813803	225814104	302	189	225813992	12	99.7	21.87	R	N/A	N/A	N/A	N/A	N/A	N/A
chr1	225817473	225818355	883	357	225817830	215	1970.81	93.74	V	N/A	N/A	N/A	N/A	N/A	N/A
chr1	225983804	225984375	572	322	225984126	43	250.46	28.52	M	N/A	N/A	N/A	N/A	N/A	N/A
chr1	226111602	226112061	460	173	226111775	62	675.1	85.27	E	chr1	226111696	226111982	LTR45B	LTR	ERV1
chr1	226143072	226143729	658	344	226143416	95	822.56	82.44	J	N/A	N/A	N/A	N/A	N/A	N/A
chr1	226363361	226363853	493	262	226363623	31	144.54	18.74	V	N/A	N/A	N/A	N/A	N/A	N/A
chr1	226394003	226394715	713	382	226394385	66	437.85	23.85	P	N/A	N/A	N/A	N/A	N/A	N/A
chr1	226420055	226420729	675	373	226420428	40	168.46	16.67	V	N/A	N/A	N/A	N/A	N/A	N/A
chr1	226640421	226640743	323	207	226640628	20	196.68	43.79	D	chr1	226639967	226640842	L1MEd	LINE	L1
chr1	226660800	226661888	1089	449	226661249	236	2488.06	129.93	N	N/A	N/A	N/A	N/A	N/A	N/A
chr1	226679537	226680012	476	218	226679755	115	1479.62	136.38	E	N/A	N/A	N/A	N/A	N/A	N/A
chr1	226688838	226689505	668	323	226689161	52	376.05	39.93	J	N/A	N/A	N/A	N/A	N/A	N/A
chr1	226711866	226712621	756	402	226712268	308	3100	175.13	K	N/A	N/A	N/A	N/A	N/A	N/A
chr1	226718855	226719269	415	196	226719051	19	116.55	18.61	U	N/A	N/A	N/A	N/A	N/A	N/A
chr1	226756679	226757283	605	383	226757062	165	1939.76	131.15	T	N/A	N/A	N/A	N/A	N/A	N/A
chr1	226976595	226977032	438	280	226976875	18	144.29	39.63	J	chr1	226975892	226977219	LTR12C	LTR	ERV1
chr1	227268537	227268910	374	93	227268630	19	166.87	41.32	D	chr1	227268361	227269130	MER21A	LTR	ERV1
chr1	227405687	227406302	616	326	227406013	86	955.12	138.28	J	N/A	N/A	N/A	N/A	N/A	N/A
chr1	227413179	227413469	291	156	227413335	11	90.05	19.26	D	N/A	N/A	N/A	N/A	N/A	N/A
chr1	227443436	227443793	358	117	227443553	14	100.13	23.78	D	N/A	N/A	N/A	N/A	N/A	N/A
chr1	227828241	227828681	441	275	227828516	39	307.71	45.08	K	N/A	N/A	N/A	N/A	N/A	N/A
chr1	227920147	227920545	399	229	227920376	26	264.25	47.6	T	chr1	227920015	227920654	MER51A	LTR	ERV1
chr1	228038684	228039093	410	202	228038886	28	215.05	25.65	A	chr1	228038637	228039054	MER57A	LTR	ERV1
chr1	228192807	228193269	463	129	228192936	19	126.44	19.96	A	chr1	228192925	228192980	MER3	DNA	MER1_type
chr1	228249425	228249969	545	269	228249694	63	567.15	71.86	A	chr1	228249357	228249755	MSTB1	LTR	MaLR
chr1	228268844	228269701	858	519	228269363	131	1305.44	94.91	S	chr1	228269349	228269386	GC_rich	Low_complexity	Low_complexity
chr1	228363380	228364157	778	366	228363746	64	351.31	27.42	G	chr1	228363417	228363811	MLT1H2	LTR	MaLR
chr1	228628663	228628976	314	117	228628780	16	141.32	35.13	D	N/A	N/A	N/A	N/A	N/A	N/A
chr1	228698128	228698519	392	117	228698245	13	95.36	19.08	D	chr1	228698111	228698639	LTR45C	LTR	ERV1
chr1	228832183	228832559	377	251	228832434	18	151.49	32.79	D	chr1	228832418	228832613	MLT1K	LTR	MaLR
chr1	228844670	228845164	495	151	228844821	33	145.9	16.01	S	N/A	N/A	N/A	N/A	N/A	N/A
chr1	228930182	228930592	411	213	228930395	17	135.07	26.24	D	chr1	228930198	228930931	LTR8A	LTR	ERV1
chr1	228974331	228974639	309	164	228974495	21	161.11	25.76	A	N/A	N/A	N/A	N/A	N/A	N/A
chr1	229101148	229101545	398	277	229101425	14	93.03	17.56	A	N/A	N/A	N/A	N/A	N/A	N/A
chr1	229491269	229491517	249	133	229491402	26	353.56	88.1	A	chr1	229490995	229492410	LTR12C	LTR	ERV1
chr1	229520026	229520694	669	256	229520282	90	1072.61	152.66	J	chr1	229519654	229520563	LTR12D	LTR	ERV1
chr1	229632605	229632862	258	164	229632769	18	220.15	65.12	J	chr1	229632292	229633708	LTR12C	LTR	ERV1
chr1	229843901	229844124	224	113	229844014	20	249.74	58.55	J	chr1	229843543	229844838	LTR12C	LTR	ERV1
chr1	230095957	230096274	318	153	230096110	28	240.18	38.64	D	chr1	230095827	230096171	MLT1I	LTR	MaLR
chr1	230516499	230516944	446	169	230516668	32	340.95	68.1	J	chr1	230516207	230516826	LTR12_	LTR	ERV1
chr1	231102170	231102495	326	169	231102339	18	144.14	23.92	D	chr1	231102085	231102428	MLT1J	LTR	MaLR
chr1	231331833	231332351	519	402	231332235	63	859.83	195.36	J	chr1	231331318	231332662	LTR12C	LTR	ERV1
chr1	231598195	231598760	566	174	231598369	32	319.71	54.74	J	chr1	231597934	231598640	LTR12_	LTR	ERV1
chr1	231815648	231816467	820	262	231815910	87	750.07	90.16	S	N/A	N/A	N/A	N/A	N/A	N/A
chr1	231926483	231927139	657	333	231926816	89	1017.28	162.59	J	chr1	231926438	231927255	LTR12D	LTR	ERV1
chr1	232725794	232726310	517	324	232726118	70	430	31.27	R	N/A	N/A	N/A	N/A	N/A	N/A
chr1	232792032	232792585	554	320	232792352	33	186.32	20.39	J	chr1	232792234	232792716	MLT1K	LTR	MaLR
chr1	233068547	233069034	488	192	233068739	56	308.8	22.86	P	chr1	233068651	233068820	MLT1F	LTR	MaLR
chr1	233145339	233145729	391	240	233145579	29	236.87	36.13	J	chr1	233145355	233145831	MER51E	LTR	ERV1
chr1	233177447	233178415	969	366	233177813	308	2544.39	78.62	U	N/A	N/A	N/A	N/A	N/A	N/A
chr1	233557877	233558673	797	422	233558299	96	743.86	65.39	L	N/A	N/A	N/A	N/A	N/A	N/A
chr1	233597013	233597677	665	338	233597351	53	226.92	18.9	S	N/A	N/A	N/A	N/A	N/A	N/A
chr1	233734424	233735226	803	589	233735013	49	208.93	19.1	B	N/A	N/A	N/A	N/A	N/A	N/A
chr1	234096748	234097472	725	303	234097051	199	2230.99	131.9	U	N/A	N/A	N/A	N/A	N/A	N/A
chr1	234339143	234339534	392	275	234339418	18	112.11	17.31	D	N/A	N/A	N/A	N/A	N/A	N/A
chr1	234518058	234518425	368	139	234518197	22	156.14	18.61	T	chr1	234517858	234518460	LTR9	LTR	ERV1
chr1	234584279	234584826	548	348	234584627	62	443.18	43.23	E	chr1	234584363	234585026	LTR51	LTR	ERV1
chr1	234676722	234677048	327	211	234676933	15	120.04	25.27	D	N/A	N/A	N/A	N/A	N/A	N/A
chr1	235024718	235025702	985	451	235025169	296	2928.92	107.92	S	N/A	N/A	N/A	N/A	N/A	N/A
chr1	236085418	236085808	391	229	236085647	18	154.27	40.29	D	chr1	236085419	236085877	MER101	LTR	ERV1
chr1	236093225	236093558	334	115	236093340	16	164.71	45.26	D	N/A	N/A	N/A	N/A	N/A	N/A
chr1	237484922	237485230	309	193	237485115	11	109.78	34.47	J	chr1	237484684	237485984	LTR12D	LTR	ERV1
chr1	238207306	238207702	397	263	238207569	31	269.11	47.73	D	chr1	238207435	238207677	MLT1J2	LTR	MaLR
chr1	239749309	239750212	904	488	239749797	222	2706.28	200.86	B	N/A	N/A	N/A	N/A	N/A	N/A
chr1	240085049	240085317	269	155	240085204	15	153.57	40.52	M	chr1	240084642	240086064	LTR12C	LTR	ERV1
chr1	241003606	241003846	241	131	241003737	11	122.13	38.31	J	chr1	241003331	241004682	LTR12C	LTR	ERV1
chr1	242150935	242151475	541	256	242151191	25	199.26	42.15	D	chr1	242151118	242151616	MLT1L	LTR	MaLR
chr1	242277794	242278727	934	522	242278316	250	2881.1	142.07	U	N/A	N/A	N/A	N/A	N/A	N/A
chr1	242299319	242299763	445	238	242299557	28	257.22	53.86	A	chr1	242299227	242299630	MLT1K	LTR	MaLR
chr1	242441168	242441604	437	144	242441312	19	111.31	18.29	D	N/A	N/A	N/A	N/A	N/A	N/A
chr1	242554795	242555233	439	300	242555095	32	250.57	31.45	T	chr1	242554959	242555330	MER57A	LTR	ERV1
chr1	242912003	242912349	347	156	242912159	15	132.55	35.25	M	chr1	242911787	242912329	LTR12B	LTR	ERV1
chr1	243228514	243229144	631	328	243228842	39	243.11	30.67	D	chr1	243228730	243228890	LTR67	LTR	ERVL
chr1	243275425	243275856	432	165	243275590	42	394.65	37.29	J	chr1	243275230	243275966	MER51A	LTR	ERV1
chr1	243281176	243281707	532	276	243281452	49	296.45	24.19	T	N/A	N/A	N/A	N/A	N/A	N/A
chr1	243383109	243383616	508	207	243383316	32	232.81	37.88	A	N/A	N/A	N/A	N/A	N/A	N/A
chr1	244114406	244114854	449	184	244114590	28	236.34	47.56	M	chr1	244114572	244115261	LTR12_	LTR	ERV1
chr1	244218237	244218991	755	426	244218663	379	3100	163.45	N	chr1	244218611	244218950	MLT1K	LTR	MaLR
chr1	244795936	244796644	709	325	244796261	143	1146.02	60.54	P	N/A	N/A	N/A	N/A	N/A	N/A
chr1	244912764	244913325	562	292	244913056	26	186.22	27.91	D	N/A	N/A	N/A	N/A	N/A	N/A
chr1	244928898	244929494	597	346	244929244	103	782.17	46.81	T	N/A	N/A	N/A	N/A	N/A	N/A
chr1	244940378	244940650	273	170	244940548	12	113.66	28.62	J	chr1	244940512	244941369	LTR12	LTR	ERV1
chr1	244942475	244942733	259	116	244942591	73	1259.3	271.97	J	chr1	244942184	244943038	LTR12	LTR	ERV1
chr1	245027535	245027869	335	209	245027744	23	148.81	18.34	A	N/A	N/A	N/A	N/A	N/A	N/A
chr1	245160854	245161259	406	117	245160971	35	296.26	35.86	K	N/A	N/A	N/A	N/A	N/A	N/A
chr1	245237593	245238475	883	450	245238043	310	3100	176.21	U	N/A	N/A	N/A	N/A	N/A	N/A
chr1	245308431	245309009	579	341	245308772	56	465.1	42.04	B	N/A	N/A	N/A	N/A	N/A	N/A
chr1	245333773	245334747	975	585	245334358	302	3195.42	144.1	U	N/A	N/A	N/A	N/A	N/A	N/A
chr1	245440338	245441226	889	494	245440832	182	1915.58	118.27	B	N/A	N/A	N/A	N/A	N/A	N/A
chr1	245869227	245869561	335	175	245869402	17	146	29.38	D	N/A	N/A	N/A	N/A	N/A	N/A
chr1	246921158	246921977	820	407	246921565	160	2126.91	266.98	J	N/A	N/A	N/A	N/A	N/A	N/A
chr1	247086656	247087008	353	134	247086790	17	113.59	21.22	K	N/A	N/A	N/A	N/A	N/A	N/A
chr1	247098458	247100187	1730	436	247098894	456	3100	131.8	P	N/A	N/A	N/A	N/A	N/A	N/A
chr1	247133769	247134243	475	269	247134038	117	1122.4	56.59	V	N/A	N/A	N/A	N/A	N/A	N/A
chr1	247134702	247135205	504	286	247134988	27	111.87	14.83	U	N/A	N/A	N/A	N/A	N/A	N/A
chr1	247157155	247157523	369	262	247157417	18	177.93	51.52	D	chr1	247157414	247157451	L1PA10	LINE	L1
chr10	543038	543531	494	218	543256	21	168.12	29.72	A	N/A	N/A	N/A	N/A	N/A	N/A
chr10	967503	968099	597	265	967768	74	722.81	70.75	B	N/A	N/A	N/A	N/A	N/A	N/A
chr10	1024033	1024624	592	261	1024294	70	459.01	32.39	S	N/A	N/A	N/A	N/A	N/A	N/A
chr10	1084321	1085682	1362	611	1084932	336	3100	145.98	K	N/A	N/A	N/A	N/A	N/A	N/A
chr10	1091941	1092670	730	371	1092312	66	556.07	65.16	K	N/A	N/A	N/A	N/A	N/A	N/A
chr10	1558453	1559137	685	279	1558732	92	1117.69	191.95	J	chr10	1558554	1558958	MSTB1	LTR	MaLR
chr10	2792768	2793381	614	362	2793130	26	251.08	38.31	J	chr10	2792886	2793461	MER51A	LTR	ERV1
chr10	3021678	3022171	494	249	3021927	75	989.15	128.81	J	N/A	N/A	N/A	N/A	N/A	N/A
chr10	3046411	3046719	309	137	3046548	20	197.12	39.63	D	chr10	3045971	3046792	L1MC5	LINE	L1
chr10	3204749	3205548	800	296	3205045	112	1104.51	120.22	U	N/A	N/A	N/A	N/A	N/A	N/A
chr10	3225598	3225800	203	102	3225700	11	101.48	21.8	D	chr10	3225691	3225838	MLT1K	LTR	MaLR
chr10	3351491	3351760	270	109	3351600	14	151.64	45.21	U	chr10	3350984	3352575	LTR12C	LTR	ERV1
chr10	3674189	3674576	388	107	3674296	39	370.75	51.64	J	chr10	3674139	3674686	MLT1K	LTR	MaLR
chr10	3697466	3697983	518	230	3697696	25	110.28	10.12	T	N/A	N/A	N/A	N/A	N/A	N/A
chr10	3807868	3808104	237	115	3807983	23	189.24	25.76	M	N/A	N/A	N/A	N/A	N/A	N/A
chr10	3817175	3817949	775	492	3817667	242	2839.17	154.57	N	N/A	N/A	N/A	N/A	N/A	N/A
chr10	4711488	4711801	314	208	4711696	40	502.41	99.29	D	chr10	4711524	4711920	MER57A	LTR	ERV1
chr10	4857755	4858922	1168	573	4858328	431	3100	223.65	S	N/A	N/A	N/A	N/A	N/A	N/A
chr10	4881730	4882289	560	194	4881924	32	166.07	15.85	U	chr10	4881754	4881952	L1MA6	LINE	L1
chr10	4995492	4995728	237	113	4995605	28	393.5	103.42	S	N/A	N/A	N/A	N/A	N/A	N/A
chr10	5035943	5036170	228	115	5036058	43	690	164.71	U	N/A	N/A	N/A	N/A	N/A	N/A
chr10	5103251	5103719	469	175	5103426	24	102.63	14.96	T	chr10	5103301	5103498	MSTD	LTR	MaLR
chr10	5126422	5126768	347	113	5126535	48	485.06	61.54	T	N/A	N/A	N/A	N/A	N/A	N/A
chr10	5338715	5339151	437	265	5338980	16	130.86	28	J	chr10	5338653	5339020	MER101	LTR	ERV1
chr10	5444176	5444798	623	307	5444483	83	708.05	62.26	S	N/A	N/A	N/A	N/A	N/A	N/A
chr10	5766401	5766893	493	191	5766592	38	216.95	19.75	S	N/A	N/A	N/A	N/A	N/A	N/A
chr10	5780074	5780444	371	116	5780190	20	150.21	25.76	G	chr10	5780042	5780395	MLT1H	LTR	MaLR
chr10	5895143	5895995	853	384	5895527	184	2225.55	170.67	N	N/A	N/A	N/A	N/A	N/A	N/A
chr10	5911184	5911679	496	222	5911406	102	1253.78	118.5	T	N/A	N/A	N/A	N/A	N/A	N/A
chr10	5917681	5917927	247	106	5917787	11	99.37	24.77	D	N/A	N/A	N/A	N/A	N/A	N/A
chr10	5944997	5945583	587	302	5945299	37	288.28	39.69	J	chr10	5945151	5945310	L1MB1	LINE	L1
chr10	5950177	5950488	312	225	5950402	11	109.3	34.47	J	chr10	5950376	5950907	LTR12B	LTR	ERV1
chr10	5971688	5972328	641	410	5972098	132	1506.17	124.56	K	N/A	N/A	N/A	N/A	N/A	N/A
chr10	6245451	6246086	636	284	6245735	27	150.24	18.61	S	N/A	N/A	N/A	N/A	N/A	N/A
chr10	6276034	6276499	466	140	6276174	30	276.97	51.52	D	N/A	N/A	N/A	N/A	N/A	N/A
chr10	6663709	6664257	549	229	6663938	46	332.2	33	N	chr10	6663910	6663950	L2	LINE	L2
chr10	7016133	7016625	493	380	7016513	29	304.88	54.96	J	chr10	7015969	7016531	LTR12_	LTR	ERV1
chr10	7097552	7097907	356	205	7097757	25	182.36	27.51	D	chr10	7097602	7097762	MER63	DNA	AcHobo
chr10	8070814	8071496	683	358	8071172	127	1791	284.45	J	chr10	8071100	8071271	MLT1K	LTR	MaLR
chr10	8135119	8135757	639	396	8135515	68	586.84	54.23	D	N/A	N/A	N/A	N/A	N/A	N/A
chr10	9957204	9957685	482	331	9957535	95	1111.27	103.99	G	chr10	9957052	9957788	MLT2B5	LTR	ERVL
chr10	11260588	11261056	469	182	11260770	62	622.57	62.13	T	N/A	N/A	N/A	N/A	N/A	N/A
chr10	11382349	11382809	461	255	11382604	17	125.51	35.13	D	N/A	N/A	N/A	N/A	N/A	N/A
chr10	11621098	11621472	375	261	11621359	21	107.06	16.56	G	N/A	N/A	N/A	N/A	N/A	N/A
chr10	11720102	11720519	418	167	11720269	35	318.98	52.05	D	chr10	11720076	11720636	LTR67	LTR	ERVL
chr10	11776970	11777445	476	166	11777136	45	474.25	75.9	D	chr10	11776926	11777232	MLT1K	LTR	MaLR
chr10	11879798	11880211	414	233	11880031	34	357.28	50.51	D	chr10	11879984	11880059	LTR8A	LTR	ERV1
chr10	11906752	11907204	453	219	11906971	56	379.3	34.28	U	N/A	N/A	N/A	N/A	N/A	N/A
chr10	12124994	12125585	592	236	12125230	28	119.53	11.04	B	N/A	N/A	N/A	N/A	N/A	N/A
chr10	12150512	12151352	841	402	12150914	224	2354.03	110.13	V	N/A	N/A	N/A	N/A	N/A	N/A
chr10	12303310	12303628	319	214	12303524	17	163.78	38.35	M	chr10	12303188	12303588	MLT1L	LTR	MaLR
chr10	12347939	12348139	201	101	12348040	17	200.42	33.69	T	N/A	N/A	N/A	N/A	N/A	N/A
chr10	12391774	12392290	517	366	12392140	23	216.26	45.97	J	chr10	12391399	12392201	LTR12	LTR	ERV1
chr10	12866746	12867123	378	145	12866891	15	124.98	28.92	D	N/A	N/A	N/A	N/A	N/A	N/A
chr10	13144877	13145554	678	142	13145019	64	803.45	153.22	J	chr10	13144525	13145299	LTR8	LTR	ERV1
chr10	13243113	13243854	742	360	13243473	181	1964.43	130.62	V	N/A	N/A	N/A	N/A	N/A	N/A
chr10	13381375	13381834	460	226	13381601	27	185.32	32.92	T	N/A	N/A	N/A	N/A	N/A	N/A
chr10	13472506	13472990	485	311	13472817	70	774.48	92.81	T	chr10	13472534	13472968	MER101	LTR	ERV1
chr10	14042587	14043021	435	207	14042794	24	205.6	33.62	D	chr10	14042721	14043057	MLT1J2	LTR	MaLR
chr10	14451398	14451681	284	180	14451578	20	235.56	56.46	D	chr10	14451308	14451726	MLT1J	LTR	MaLR
chr10	14630267	14630890	624	413	14630680	116	1292.23	111.06	J	chr10	14630654	14630720	MLT1L	LTR	MaLR
chr10	14666812	14667075	264	116	14666928	11	110.23	26.42	D	chr10	14666654	14667294	MER51A	LTR	ERV1
chr10	14894262	14894671	410	109	14894371	29	316.58	88.22	J	chr10	14894160	14894812	MER51A	LTR	ERV1
chr10	14919681	14920636	956	401	14920082	230	2238.28	102.21	S	N/A	N/A	N/A	N/A	N/A	N/A
chr10	15035552	15036584	1033	597	15036149	357	3100	201.8	B	N/A	N/A	N/A	N/A	N/A	N/A
chr10	15166281	15167056	776	329	15166610	63	503.8	62.13	J	chr10	15166421	15167015	MER51A	LTR	ERV1
chr10	15170373	15171098	726	491	15170864	200	2945.96	313.27	J	N/A	N/A	N/A	N/A	N/A	N/A
chr10	15178718	15179259	542	288	15179006	50	314.93	32.63	S	N/A	N/A	N/A	N/A	N/A	N/A
chr10	15277951	15278428	478	232	15278183	24	137.12	23.4	J	chr10	15278118	15278205	MIR3	SINE	MIR
chr10	15395920	15396255	336	172	15396092	36	314.53	38.64	T	N/A	N/A	N/A	N/A	N/A	N/A
chr10	15685665	15685979	315	168	15685833	18	158.64	30.05	D	N/A	N/A	N/A	N/A	N/A	N/A
chr10	15819498	15819785	288	179	15819677	11	91.84	24.73	D	chr10	15819581	15819713	MLT1K	LTR	MaLR
chr10	15846313	15846884	572	237	15846550	53	443.82	57.25	D	chr10	15846369	15846600	MLT1I	LTR	MaLR
chr10	16899458	16899867	410	159	16899617	23	141.97	23.31	U	N/A	N/A	N/A	N/A	N/A	N/A
chr10	17033012	17033372	361	252	17033264	22	157.89	27.19	D	N/A	N/A	N/A	N/A	N/A	N/A
chr10	17083104	17083696	593	213	17083317	72	794.39	88.69	J	chr10	17082880	17083593	LTR12_	LTR	ERV1
chr10	17100645	17101074	430	329	17100974	23	247.94	57.46	J	chr10	17100305	17100980	LTR12	LTR	ERV1
chr10	17536999	17537722	724	411	17537410	191	1937.12	99.72	N	chr10	17537297	17537530	MER57A	LTR	ERV1
chr10	18279309	18279546	238	118	18279427	18	226.63	65.12	J	chr10	18278925	18280035	LTR12D	LTR	ERV1
chr10	18463658	18464194	537	271	18463929	20	153.21	25.76	D	chr10	18463855	18464174	MLT1J1	LTR	MaLR
chr10	18767290	18767642	353	180	18767470	16	167.56	42.14	D	N/A	N/A	N/A	N/A	N/A	N/A
chr10	18805303	18805651	349	237	18805540	13	125.62	36.28	D	chr10	18805198	18805665	MER51A	LTR	ERV1
chr10	18915613	18916201	589	111	18915724	41	470.21	103.42	E	chr10	18915183	18915950	LTR12_	LTR	ERV1
chr10	21322359	21322822	464	271	21322630	25	168.64	22.41	D	N/A	N/A	N/A	N/A	N/A	N/A
chr10	21505772	21506362	591	328	21506100	93	1033.31	106.57	E	chr10	21506037	21506370	MLT1I	LTR	MaLR
chr10	21697201	21697716	516	311	21697512	27	204	41.78	J	chr10	21697444	21697662	MLT1K	LTR	MaLR
chr10	21846146	21846465	320	145	21846291	17	123.06	21.99	T	N/A	N/A	N/A	N/A	N/A	N/A
chr10	21855103	21855542	440	150	21855253	30	260.63	47.23	K	N/A	N/A	N/A	N/A	N/A	N/A
chr10	22305681	22306160	480	273	22305954	24	207.74	40.41	G	N/A	N/A	N/A	N/A	N/A	N/A
chr10	22332542	22332973	432	175	22332717	43	318.55	31.94	B	N/A	N/A	N/A	N/A	N/A	N/A
chr10	22559420	22559928	509	132	22559552	55	459.63	49.07	U	N/A	N/A	N/A	N/A	N/A	N/A
chr10	22809384	22809828	445	216	22809600	18	112.11	21.29	D	N/A	N/A	N/A	N/A	N/A	N/A
chr10	22930140	22930546	407	292	22930432	16	90.96	17.17	M	N/A	N/A	N/A	N/A	N/A	N/A
chr10	23127362	23127855	494	257	23127619	19	148.1	35.63	D	chr10	23127567	23127629	MLT1H2	LTR	MaLR
chr10	23179959	23180255	297	193	23180152	12	92.42	22.85	D	chr10	23180013	23180323	LTR45B	LTR	ERV1
chr10	23774540	23774725	186	94	23774634	11	134.92	25.76	D	N/A	N/A	N/A	N/A	N/A	N/A
chr10	24707110	24707383	274	148	24707258	21	255.29	60.83	D	N/A	N/A	N/A	N/A	N/A	N/A
chr10	25053336	25054061	726	357	25053693	59	390.68	31.13	N	N/A	N/A	N/A	N/A	N/A	N/A
chr10	25119572	25120017	446	284	25119856	31	211.84	23.31	D	N/A	N/A	N/A	N/A	N/A	N/A
chr10	25345018	25345893	876	355	25345373	81	498.38	24.9	V	N/A	N/A	N/A	N/A	N/A	N/A
chr10	25442090	25442402	313	200	25442290	24	106	11.52	D	N/A	N/A	N/A	N/A	N/A	N/A
chr10	25492460	25492927	468	125	25492585	38	462.98	91.93	J	chr10	25492212	25492788	LTR12_	LTR	ERV1
chr10	25503454	25503939	486	151	25503605	51	604.87	120.22	J	N/A	N/A	N/A	N/A	N/A	N/A
chr10	25794703	25795199	497	261	25794964	21	184.54	38.94	V	N/A	N/A	N/A	N/A	N/A	N/A
chr10	26863355	26863605	251	144	26863499	43	628.63	129.32	D	N/A	N/A	N/A	N/A	N/A	N/A
chr10	27235222	27235883	662	520	27235742	82	1100.12	222.17	J	chr10	27234307	27236051	LTR12C	LTR	ERV1
chr10	27586217	27586673	457	224	27586441	32	373.24	107.25	J	chr10	27585226	27586868	LTR12C	LTR	ERV1
chr10	28169257	28169635	379	235	28169492	31	269.11	40.68	D	N/A	N/A	N/A	N/A	N/A	N/A
chr10	28631755	28632568	814	383	28632138	284	3100	220.88	T	N/A	N/A	N/A	N/A	N/A	N/A
chr10	28734122	28734535	414	167	28734289	22	151.14	25.9	J	chr10	28734217	28734441	MLT1J2	LTR	MaLR
chr10	28758710	28759193	484	151	28758861	37	384.97	50.99	J	chr10	28758563	28759279	MER51A	LTR	ERV1
chr10	29006046	29006709	664	276	29006322	139	1706.48	160.79	P	N/A	N/A	N/A	N/A	N/A	N/A
chr10	29124884	29125191	308	192	29125076	17	148.4	23.61	D	chr10	29124901	29125174	MLT1J1	LTR	MaLR
chr10	29309174	29309520	347	238	29309412	17	146.04	32.79	D	N/A	N/A	N/A	N/A	N/A	N/A
chr10	29757363	29757712	350	190	29757553	10	91.68	30.64	D	chr10	29757181	29757697	MLT2B3	LTR	ERVL
chr10	30408341	30408891	551	226	30408567	73	956.86	160.22	J	N/A	N/A	N/A	N/A	N/A	N/A
chr10	30616163	30616605	443	213	30616376	19	176.04	35.42	D	chr10	30615524	30616450	LTR1D	LTR	ERV1
chr10	30882057	30882386	330	198	30882255	41	429.16	64.61	U	chr10	30881972	30882278	MER1A	DNA	MER1_type
chr10	30894298	30894877	580	343	30894641	53	564.49	82.18	J	chr10	30894314	30894839	LTR71B	LTR	ERV1
chr10	30934507	30934730	224	113	30934620	38	613.17	145.56	J	N/A	N/A	N/A	N/A	N/A	N/A
chr10	31231037	31231189	153	77	31231114	12	215.77	40.15	J	chr10	31230659	31232288	LTR12C	LTR	ERV1
chr10	31385538	31385990	453	291	31385829	30	344.17	103.42	J	chr10	31384577	31386263	LTR12C	LTR	ERV1
chr10	31500209	31500617	409	196	31500405	22	202.97	44.78	D	chr10	31500157	31500539	MLT1J2	LTR	MaLR
chr10	31913017	31913318	302	116	31913133	17	183.77	47.45	D	N/A	N/A	N/A	N/A	N/A	N/A
chr10	31916055	31916509	455	267	31916322	49	640.96	161.93	J	chr10	31915887	31916757	LTR12D	LTR	ERV1
chr10	32087961	32088424	464	178	32088139	44	442.71	67.47	D	N/A	N/A	N/A	N/A	N/A	N/A
chr10	32088789	32089540	752	495	32089284	196	2268.14	105.5	T	N/A	N/A	N/A	N/A	N/A	N/A
chr10	32257212	32257647	436	110	32257322	22	142.87	24.88	K	N/A	N/A	N/A	N/A	N/A	N/A
chr10	32385049	32385584	536	419	32385468	43	287.99	28.98	N	N/A	N/A	N/A	N/A	N/A	N/A
chr10	32480731	32481123	393	191	32480922	60	714.42	91.12	D	chr10	32480908	32480993	MLT1K	LTR	MaLR
chr10	32707531	32707924	394	208	32707739	62	784.28	117.1	B	N/A	N/A	N/A	N/A	N/A	N/A
chr10	32930262	32930683	422	240	32930502	12	106.02	34.47	J	chr10	32930469	32931356	LTR12	LTR	ERV1
chr10	33251042	33251505	464	306	33251348	54	543.55	70.01	M	N/A	N/A	N/A	N/A	N/A	N/A
chr10	33300324	33300819	496	174	33300498	20	121.04	16.1	V	N/A	N/A	N/A	N/A	N/A	N/A
chr10	33378971	33379207	237	123	33379094	17	194.16	49.07	T	chr10	33377975	33379622	LTR12C	LTR	ERV1
chr10	33648235	33648513	279	166	33648401	16	171.92	35.42	J	chr10	33648237	33648510	LTR12B	LTR	ERV1
chr10	33797662	33798125	464	187	33797849	24	254.23	57.46	J	chr10	33796784	33798336	LTR12C	LTR	ERV1
chr10	34144751	34145214	464	207	34144958	21	206.82	46.51	J	chr10	34144641	34145163	MER51A	LTR	ERV1
chr10	34354005	34354539	535	240	34354245	52	485.96	79	D	chr10	34354202	34354526	MLT1K	LTR	MaLR
chr10	34365190	34365410	221	111	34365301	11	122.76	42.14	J	chr10	34364154	34365665	LTR12C	LTR	ERV1
chr10	35455469	35456276	808	118	35455587	32	134.29	11.71	S	N/A	N/A	N/A	N/A	N/A	N/A
chr10	35971120	35971444	325	218	35971338	16	109.39	21.22	T	N/A	N/A	N/A	N/A	N/A	N/A
chr10	36109019	36109323	305	191	36109210	13	136.54	45.97	J	chr10	36108930	36109394	LTR12B	LTR	ERV1
chr10	38067002	38067312	311	212	38067214	17	190.76	45.97	J	chr10	38066135	38067648	LTR12C	LTR	ERV1
chr10	38731735	38732103	369	105	38731840	22	248.6	76.61	K	N/A	N/A	N/A	N/A	N/A	N/A
chr10	41699719	41700157	439	198	41699917	51	105.97	9.63	F	N/A	N/A	N/A	N/A	N/A	N/A
chr10	42183014	42183848	835	499	42183513	299	3100	260.47	B	N/A	N/A	N/A	N/A	N/A	N/A
chr10	42290604	42291085	482	317	42290921	67	837.03	139.11	J	chr10	42290837	42290936	REP522	Satellite	telo
chr10	42435750	42436051	302	103	42435853	18	207.55	57.46	M	chr10	42435688	42435861	L1M4c	LINE	L1
chr10	42583439	42583826	388	187	42583626	14	93.92	20.7	D	N/A	N/A	N/A	N/A	N/A	N/A
chr10	43122327	43122866	540	290	43122617	41	422.82	77.82	A	chr10	43122431	43122681	LTR12B	LTR	ERV1
chr10	43171194	43171679	486	370	43171564	36	312.65	42.32	T	chr10	43171280	43171824	LTR8	LTR	ERV1
chr10	43177544	43178035	492	224	43177768	26	209.81	35.91	D	N/A	N/A	N/A	N/A	N/A	N/A
chr10	43211265	43211964	700	403	43211668	71	392.23	28.4	F	N/A	N/A	N/A	N/A	N/A	N/A
chr10	43212380	43212972	593	437	43212817	71	605.93	55.54	L	N/A	N/A	N/A	N/A	N/A	N/A
chr10	43224114	43224802	689	262	43224376	71	427.92	21.45	N	N/A	N/A	N/A	N/A	N/A	N/A
chr10	43233331	43233969	639	424	43233755	40	255.95	22.79	U	chr10	43233500	43233838	MER74C	LTR	ERVL
chr10	43575234	43575696	463	183	43575417	31	333	80.5	J	chr10	43575002	43575647	LTR12_	LTR	ERV1
chr10	44774771	44775198	428	321	44775092	24	142.86	19.91	T	chr10	44775054	44775209	(CGGGG)n	Simple_repeat	Simple_repeat
chr10	44791191	44791660	470	266	44791457	35	271.08	30.56	D	N/A	N/A	N/A	N/A	N/A	N/A
chr10	44886698	44887140	443	237	44886935	33	393.02	84.27	D	N/A	N/A	N/A	N/A	N/A	N/A
chr10	45224306	45224759	454	256	45224562	25	188.73	35.53	S	chr10	45224393	45224815	MER57A	LTR	ERV1
chr10	45487968	45488781	814	331	45488299	141	1619.19	159.72	J	N/A	N/A	N/A	N/A	N/A	N/A
chr10	46398483	46399029	547	298	46398781	82	675.64	52.41	Q	chr10	46398616	46398862	MLT1K	LTR	MaLR
chr10	46400486	46401154	669	376	46400862	105	865.27	66.35	Q	chr10	46400593	46401011	MLT1J	LTR	MaLR
chr10	46451410	46452180	771	449	46451859	75	505.17	47.95	J	chr10	46451590	46452140	LTR12_	LTR	ERV1
chr10	46482151	46482526	376	196	46482347	69	655.31	45.53	Q	chr10	46482227	46482360	MLT1J1	LTR	MaLR
chr10	48040103	48040850	748	393	48040496	189	2286.32	210.59	J	chr10	48040101	48040506	MLT1K	LTR	MaLR
chr10	48102103	48102521	419	316	48102419	15	104.99	19.16	J	chr10	48102108	48102595	LTR45B	LTR	ERV1
chr10	48167879	48168351	473	281	48168160	58	565.53	63.65	D	chr10	48168074	48168420	MLT1I	LTR	MaLR
chr10	48192149	48192948	800	208	48192357	92	924.48	113.87	J	chr10	48192119	48192610	LTR12_	LTR	ERV1
chr10	48263146	48263751	606	120	48263266	54	520.08	60.38	J	chr10	48263125	48263602	LTR12	LTR	ERV1
chr10	48276551	48277316	766	273	48276824	126	1612.78	214.68	J	chr10	48276378	48277070	LTR12_	LTR	ERV1
chr10	49078274	49078597	324	118	49078392	25	251	52.43	J	chr10	49078249	49078643	MER101	LTR	ERV1
chr10	49096517	49096852	336	134	49096651	33	350.97	51.96	D	chr10	49096514	49097028	MLT1K	LTR	MaLR
chr10	49162178	49162631	454	151	49162329	26	182.63	28.79	D	chr10	49162176	49162330	MLT1J2	LTR	MaLR
chr10	49184253	49184861	609	168	49184421	37	182.52	14.21	S	N/A	N/A	N/A	N/A	N/A	N/A
chr10	49428292	49428748	457	275	49428567	36	313.55	45.26	A	chr10	49428431	49428815	MLT1J2	LTR	MaLR
chr10	49996501	49996882	382	187	49996688	86	1027.65	87.3	E	N/A	N/A	N/A	N/A	N/A	N/A
chr10	50050698	50051589	892	297	50050995	78	399.7	33.63	G	chr10	50050948	50051352	MLT1K	LTR	MaLR
chr10	50095694	50096055	362	192	50095886	27	218.51	27.28	D	chr10	50095855	50096018	LTR33	LTR	ERVL
chr10	50560418	50560943	526	186	50560604	39	419.74	84.86	J	chr10	50560313	50560873	LTR12B	LTR	ERV1
chr10	50659597	50660152	556	459	50660056	42	352.45	42.94	J	chr10	50659863	50660289	LTR12B	LTR	ERV1
chr10	51242108	51242658	551	221	51242329	33	155.1	20.04	P	N/A	N/A	N/A	N/A	N/A	N/A
chr10	51680339	51680631	293	122	51680461	21	161.97	24.67	D	N/A	N/A	N/A	N/A	N/A	N/A
chr10	51757269	51757576	308	115	51757384	27	153.68	18.74	L	N/A	N/A	N/A	N/A	N/A	N/A
chr10	51847942	51848655	714	335	51848277	136	1481.14	138.3	N	N/A	N/A	N/A	N/A	N/A	N/A
chr10	51903504	51903844	341	162	51903666	16	103.94	19.03	D	N/A	N/A	N/A	N/A	N/A	N/A
chr10	52013083	52013505	423	186	52013269	49	285.42	21.19	L	N/A	N/A	N/A	N/A	N/A	N/A
chr10	52051693	52052344	652	346	52052039	32	107.34	9.1	P	N/A	N/A	N/A	N/A	N/A	N/A
chr10	52393548	52394212	665	477	52394025	59	702.73	114.88	J	chr10	52393627	52394453	LTR12D	LTR	ERV1
chr10	57790637	57791500	864	435	57791072	326	3100	186.27	B	N/A	N/A	N/A	N/A	N/A	N/A
chr10	59697534	59698184	651	326	59697860	42	237.35	31.39	L	N/A	N/A	N/A	N/A	N/A	N/A
chr10	59877328	59877665	338	136	59877464	14	143.66	42.14	J	chr10	59877030	59878572	LTR12C	LTR	ERV1
chr10	61457779	61458274	496	265	61458044	22	134.48	24.25	D	N/A	N/A	N/A	N/A	N/A	N/A
chr10	61460242	61460648	407	199	61460441	17	122.48	21.8	D	chr10	61460205	61460618	LTR45B	LTR	ERV1
chr10	62207907	62208516	610	275	62208182	154	1857.88	134.23	P	N/A	N/A	N/A	N/A	N/A	N/A
chr10	62538645	62539164	520	236	62538881	47	422.08	50.23	D	N/A	N/A	N/A	N/A	N/A	N/A
chr10	62542934	62543200	267	112	62543046	21	216.64	45.86	D	chr10	62542714	62543185	MLT1K	LTR	MaLR
chr10	63327417	63327784	368	210	63327627	21	111.05	16.12	R	N/A	N/A	N/A	N/A	N/A	N/A
chr10	63711069	63711399	331	80	63711149	17	186.06	61.29	J	chr10	63709958	63711568	LTR12C	LTR	ERV1
chr10	63729226	63729557	332	225	63729451	11	102.89	28.62	D	chr10	63729451	63729534	MLT1L	LTR	MaLR
chr10	63745362	63745670	309	160	63745522	22	151.14	21.61	D	N/A	N/A	N/A	N/A	N/A	N/A
chr10	63907431	63907820	390	151	63907582	30	324.3	73.6	D	chr10	63907351	63907727	MLT1I	LTR	MaLR
chr10	64533622	64534174	553	327	64533949	43	512.47	111.08	T	chr10	64533803	64534375	LTR8	LTR	ERV1
chr10	65182057	65182533	477	226	65182283	22	207.43	45.08	J	chr10	65182118	65182602	MER51E	LTR	ERV1
chr10	65626019	65626265	247	118	65626137	10	107.44	34.47	J	chr10	65625845	65627095	LTR12C	LTR	ERV1
chr10	69120097	69120410	314	204	69120301	10	96.55	34.47	J	chr10	69119733	69120489	LTR12	LTR	ERV1
chr10	69267714	69268079	366	233	69267947	17	102.88	18.86	B	N/A	N/A	N/A	N/A	N/A	N/A
chr10	69307673	69308151	479	205	69307878	29	295.05	67.87	J	chr10	69307687	69308072	LTR56	LTR	ERV1
chr10	69314772	69315173	402	149	69314921	28	178.26	18.25	S	N/A	N/A	N/A	N/A	N/A	N/A
chr10	69610506	69610781	276	113	69610619	13	140.03	44.16	A	N/A	N/A	N/A	N/A	N/A	N/A
chr10	70029970	70030474	505	394	70030364	26	114.61	13.01	U	N/A	N/A	N/A	N/A	N/A	N/A
chr10	70150715	70151201	487	177	70150892	24	108.37	14.72	S	N/A	N/A	N/A	N/A	N/A	N/A
chr10	70252383	70252849	467	124	70252507	44	550.04	141.51	J	chr10	70252246	70252867	LTR12D	LTR	ERV1
chr10	70330427	70331247	821	496	70330923	144	1516.46	117.96	S	N/A	N/A	N/A	N/A	N/A	N/A
chr10	70418039	70418918	880	387	70418426	298	3100	157.85	V	N/A	N/A	N/A	N/A	N/A	N/A
chr10	70517584	70518033	450	254	70517838	25	95.73	8.86	P	N/A	N/A	N/A	N/A	N/A	N/A
chr10	70522893	70523452	560	315	70523208	48	412.03	54.74	E	N/A	N/A	N/A	N/A	N/A	N/A
chr10	70553450	70554115	666	242	70553692	32	107.45	7.87	S	N/A	N/A	N/A	N/A	N/A	N/A
chr10	70554526	70554947	422	300	70554826	22	119.56	14.13	K	N/A	N/A	N/A	N/A	N/A	N/A
chr10	70603500	70604156	657	335	70603835	27	239.36	69.36	J	chr10	70603732	70604030	LTR12_	LTR	ERV1
chr10	70605112	70605543	432	235	70605347	35	333.44	55.2	R	chr10	70605133	70605657	LTR12	LTR	ERV1
chr10	70671719	70672090	372	261	70671980	20	111.63	19.32	T	N/A	N/A	N/A	N/A	N/A	N/A
chr10	70745184	70745827	644	270	70745454	83	369.09	24.49	P	N/A	N/A	N/A	N/A	N/A	N/A
chr10	70748248	70748716	469	233	70748481	28	126.68	14.05	L	N/A	N/A	N/A	N/A	N/A	N/A
chr10	70855170	70855862	693	252	70855422	203	2568.52	202.02	J	chr10	70855241	70855490	MLT1L	LTR	MaLR
chr10	70880748	70881514	767	449	70881197	174	2295.99	246.99	J	N/A	N/A	N/A	N/A	N/A	N/A
chr10	70946004	70946407	404	177	70946181	16	91.43	17.17	A	N/A	N/A	N/A	N/A	N/A	N/A
chr10	71030459	71031024	566	241	71030700	35	296.26	56.24	D	chr10	71030524	71030921	MLT1K	LTR	MaLR
chr10	71079332	71079787	456	243	71079575	15	105.66	25.76	D	N/A	N/A	N/A	N/A	N/A	N/A
chr10	71336117	71336482	366	165	71336282	13	104.02	20.82	D	chr10	71336012	71336422	MLT1H2	LTR	MaLR
chr10	71424039	71424396	358	184	71424223	38	261.87	25.99	J	chr10	71424209	71424301	MLT1J	LTR	MaLR
chr10	71812081	71812826	746	434	71812515	144	1366.14	81.68	U	N/A	N/A	N/A	N/A	N/A	N/A
chr10	71827560	71827902	343	117	71827677	34	273.6	35.13	D	chr10	71827610	71827843	MIRb	SINE	MIR
chr10	71835125	71835661	537	330	71835455	31	139.43	16.28	K	N/A	N/A	N/A	N/A	N/A	N/A
chr10	71958435	71959032	598	280	71958715	33	126.43	15.74	J	chr10	71958395	71958879	MLT1J	LTR	MaLR
chr10	71978095	71978549	455	191	71978286	32	243.53	35.33	D	N/A	N/A	N/A	N/A	N/A	N/A
chr10	72009212	72009913	702	292	72009504	203	1951.79	82.38	E	chr10	72009415	72009835	MLT1K	LTR	MaLR
chr10	72051293	72051573	281	118	72051411	13	96.56	23.42	J	chr10	72051339	72051668	MER57A	LTR	ERV1
chr10	72321299	72321696	398	289	72321588	20	153.78	34.6	E	chr10	72320684	72321609	LTR28	LTR	ERV1
chr10	72621689	72621917	229	115	72621804	10	96.93	29.27	D	chr10	72621801	72621923	Charlie5	DNA	MER1_type
chr10	72753097	72753687	591	248	72753345	58	448.76	51.52	E	chr10	72753033	72753500	MLT1J	LTR	MaLR
chr10	72789289	72789905	617	366	72789655	36	164.41	13.39	T	chr10	72789627	72789700	MIR	SINE	MIR
chr10	72807081	72807637	557	194	72807275	81	730.47	65.12	T	N/A	N/A	N/A	N/A	N/A	N/A
chr10	72939074	72939735	662	315	72939389	105	1210.74	147.47	A	chr10	72939041	72939531	MLT1K	LTR	MaLR
chr10	72985536	72985844	309	170	72985706	23	188.93	28.79	D	N/A	N/A	N/A	N/A	N/A	N/A
chr10	73067889	73068377	489	251	73068140	59	294.84	17.17	N	N/A	N/A	N/A	N/A	N/A	N/A
chr10	73152504	73153023	520	199	73152703	41	323.67	32.02	J	N/A	N/A	N/A	N/A	N/A	N/A
chr10	73154216	73154787	572	302	73154518	106	1185.04	110.41	J	chr10	73154476	73154711	MLT1K	LTR	MaLR
chr10	73198574	73198995	422	234	73198808	22	128.03	17.97	T	N/A	N/A	N/A	N/A	N/A	N/A
chr10	73226519	73227380	862	466	73226985	230	2323.77	116.34	T	N/A	N/A	N/A	N/A	N/A	N/A
chr10	73272917	73273354	438	190	73273107	30	153.84	20.15	G	N/A	N/A	N/A	N/A	N/A	N/A
chr10	73280837	73281391	555	306	73281143	26	145.54	23.4	N	N/A	N/A	N/A	N/A	N/A	N/A
chr10	73290017	73290521	505	283	73290300	32	118.56	10.18	V	N/A	N/A	N/A	N/A	N/A	N/A
chr10	73350447	73350822	376	154	73350601	23	164.57	25.76	T	chr10	73350429	73351121	LTR8	LTR	ERV1
chr10	73565844	73566618	775	488	73566332	132	1693.33	155.04	J	chr10	73565940	73566823	LTR12	LTR	ERV1
chr10	73703168	73704050	883	417	73703585	182	1546.79	62.97	P	N/A	N/A	N/A	N/A	N/A	N/A
chr10	73725598	73726059	462	206	73725804	33	189.23	24.72	R	chr10	73725609	73726088	MLT1K	LTR	MaLR
chr10	73727260	73728483	1224	673	73727933	288	2576.97	107.34	U	N/A	N/A	N/A	N/A	N/A	N/A
chr10	73731274	73731539	266	150	73731424	24	210.75	34.24	E	chr10	73730192	73731784	LTR12C	LTR	ERV1
chr10	74120140	74120520	381	145	74120285	16	102.89	17.71	R	N/A	N/A	N/A	N/A	N/A	N/A
chr10	74121670	74122069	400	138	74121808	63	519.9	43.21	S	N/A	N/A	N/A	N/A	N/A	N/A
chr10	74538694	74539269	576	253	74538947	40	334.17	64.4	R	N/A	N/A	N/A	N/A	N/A	N/A
chr10	74681399	74681834	436	133	74681532	22	125.58	18.06	L	N/A	N/A	N/A	N/A	N/A	N/A
chr10	75035976	75036339	364	202	75036178	27	267.96	58.61	D	chr10	75036114	75036228	FLAM_A	SINE	Alu
chr10	75211644	75212049	406	173	75211817	32	172.68	13.64	P	N/A	N/A	N/A	N/A	N/A	N/A
chr10	75214768	75215465	698	292	75215060	169	1360.68	55.03	N	N/A	N/A	N/A	N/A	N/A	N/A
chr10	75246603	75247226	624	325	75246928	41	232.19	28.13	T	N/A	N/A	N/A	N/A	N/A	N/A
chr10	75375238	75375641	404	196	75375434	58	668.96	111	J	chr10	75374216	75375727	LTR12C	LTR	ERV1
chr10	75419422	75419853	432	127	75419549	20	102.73	15.58	R	N/A	N/A	N/A	N/A	N/A	N/A
chr10	75427394	75428159	766	429	75427823	112	816.91	46.37	P	N/A	N/A	N/A	N/A	N/A	N/A
chr10	75606007	75606855	849	452	75606459	135	773.28	40.48	S	N/A	N/A	N/A	N/A	N/A	N/A
chr10	76255473	76256754	1282	831	76256304	633	3100	117.42	V	N/A	N/A	N/A	N/A	N/A	N/A
chr10	76667816	76668246	431	228	76668044	27	188.9	26.32	E	N/A	N/A	N/A	N/A	N/A	N/A
chr10	76699331	76699863	533	210	76699541	165	2253.96	204.48	J	chr10	76699530	76699709	MLT1J	LTR	MaLR
chr10	76711697	76712379	683	338	76712035	56	404.06	52.75	A	chr10	76711776	76712353	MLT1L	LTR	MaLR
chr10	76722159	76722643	485	262	76722421	25	173.04	32.61	A	chr10	76722050	76722456	MLT1K	LTR	MaLR
chr10	76810646	76811117	472	284	76810930	24	181.88	34.6	D	chr10	76810792	76810973	MLT1J	LTR	MaLR
chr10	76831323	76831888	566	289	76831612	18	146.69	46.24	D	N/A	N/A	N/A	N/A	N/A	N/A
chr10	78294676	78295148	473	220	78294896	18	168.95	36.8	D	chr10	78294854	78295220	MLT1L	LTR	MaLR
chr10	79012453	79012960	508	260	79012713	51	405.81	34.5	J	N/A	N/A	N/A	N/A	N/A	N/A
chr10	79458835	79459725	891	526	79459361	97	536.32	31.42	U	N/A	N/A	N/A	N/A	N/A	N/A
chr10	79463278	79463913	636	327	79463605	144	1319.26	71.98	P	N/A	N/A	N/A	N/A	N/A	N/A
chr10	79473218	79473826	609	262	79473480	26	128.67	15.69	Q	N/A	N/A	N/A	N/A	N/A	N/A
chr10	79564600	79565259	660	287	79564887	236	3034.4	176.82	T	chr10	79564511	79565053	MLT1K	LTR	MaLR
chr10	79649126	79649447	322	210	79649336	16	118.12	28.18	J	N/A	N/A	N/A	N/A	N/A	N/A
chr10	79649535	79649977	443	122	79649657	70	833.54	129.85	J	chr10	79649338	79649856	LTR12	LTR	ERV1
chr10	79729726	79730688	963	328	79730054	98	908.06	81.35	J	chr10	79729835	79730354	LTR12	LTR	ERV1
chr10	79836717	79837239	523	210	79836927	121	1532.96	126.31	J	N/A	N/A	N/A	N/A	N/A	N/A
chr10	79853984	79854320	337	101	79854085	19	200.76	59.45	J	chr10	79853814	79854298	LTR12_	LTR	ERV1
chr10	79878683	79879036	354	208	79878891	17	127.15	25.76	J	chr10	79878688	79879002	MLT1I	LTR	MaLR
chr10	80141976	80142471	496	207	80142183	144	2013.94	235.53	J	chr10	80142106	80142547	MLT1K	LTR	MaLR
chr10	80451890	80453098	1209	585	80452475	328	3100	122.56	T	N/A	N/A	N/A	N/A	N/A	N/A
chr10	80776956	80777509	554	275	80777231	25	90.63	12.69	S	N/A	N/A	N/A	N/A	N/A	N/A
chr10	80786761	80787461	701	298	80787059	39	273.28	33.03	M	chr10	80787015	80787442	LTR12B	LTR	ERV1
chr10	80875284	80875949	666	367	80875651	43	264.04	29.01	U	N/A	N/A	N/A	N/A	N/A	N/A
chr10	82065654	82066060	407	291	82065945	49	647.18	152.53	J	chr10	82064991	82066363	LTR12C	LTR	ERV1
chr10	82107098	82107468	371	153	82107251	14	107.93	25.76	D	N/A	N/A	N/A	N/A	N/A	N/A
chr10	82108636	82108902	267	161	82108797	18	194.18	42.94	J	chr10	82108488	82109776	LTR12C	LTR	ERV1
chr10	82293538	82294034	497	244	82293782	17	120.81	33.09	J	chr10	82292817	82294195	LTR12C	LTR	ERV1
chr10	82336341	82336590	250	118	82336459	36	470.78	92	T	chr10	82335430	82336865	LTR12C	LTR	ERV1
chr10	82433820	82434648	829	354	82434174	231	3100	411.1	J	chr10	82434023	82434454	MLT1J	LTR	MaLR
chr10	82521732	82522173	442	207	82521939	37	251.5	26.91	T	chr10	82521821	82521942	MIRb	SINE	MIR
chr10	82564440	82564832	393	283	82564723	30	353.82	100.18	J	chr10	82563763	82565040	LTR12C	LTR	ERV1
chr10	82609990	82610141	152	77	82610067	12	212.71	38.64	J	chr10	82608787	82610432	LTR12C	LTR	ERV1
chr10	83240232	83240534	303	193	83240425	11	110.75	26.81	J	chr10	83240259	83240694	LTR12B	LTR	ERV1
chr10	85826748	85827298	551	300	85827048	16	92.4	21.8	D	chr10	85826890	85827062	LTR16C	LTR	ERVL
chr10	85888846	85889547	702	360	85889206	118	1131.5	100.8	S	N/A	N/A	N/A	N/A	N/A	N/A
chr10	86061226	86061921	696	245	86061471	61	605.49	68.84	J	chr10	86061242	86061703	LTR12_	LTR	ERV1
chr10	86083671	86084484	814	424	86084095	53	376.9	37.45	G	N/A	N/A	N/A	N/A	N/A	N/A
chr10	86321800	86322139	340	116	86321916	56	825.18	189.63	J	chr10	86320753	86322324	LTR12C	LTR	ERV1
chr10	87607479	87607861	383	274	87607753	14	101.87	24.01	D	N/A	N/A	N/A	N/A	N/A	N/A
chr10	88008118	88008512	395	273	88008391	45	609.7	153.22	D	chr10	88008127	88008461	MLT1I	LTR	MaLR
chr10	88087698	88088260	563	211	88087909	176	2856.44	275.57	J	chr10	88087846	88087920	MLT1K	LTR	MaLR
chr10	88271322	88271927	606	304	88271626	70	734.7	113.18	B	N/A	N/A	N/A	N/A	N/A	N/A
chr10	88364674	88365053	380	193	88364867	23	211.29	37.47	D	chr10	88364740	88365142	MLT1I	LTR	MaLR
chr10	88413377	88413653	277	168	88413545	12	128.51	38.31	D	N/A	N/A	N/A	N/A	N/A	N/A
chr10	88843201	88843616	416	155	88843356	15	96.01	27.91	P	N/A	N/A	N/A	N/A	N/A	N/A
chr10	89807544	89807945	402	103	89807647	22	230.35	62.14	D	chr10	89807551	89807969	MLT1J	LTR	MaLR
chr10	90585390	90585711	322	109	90585499	10	93.62	22.08	D	N/A	N/A	N/A	N/A	N/A	N/A
chr10	90732125	90732506	382	210	90732335	19	192.5	47.45	D	N/A	N/A	N/A	N/A	N/A	N/A
chr10	90767816	90768117	302	116	90767932	21	252.59	76.61	J	chr10	90767490	90768878	LTR12C	LTR	ERV1
chr10	91092331	91092662	332	175	91092506	25	272.59	57.02	D	N/A	N/A	N/A	N/A	N/A	N/A
chr10	91155918	91156222	305	200	91156118	24	298.33	72.78	J	chr10	91155953	91156573	LTR12_	LTR	ERV1
chr10	91393466	91394241	776	321	91393787	77	679.32	56.9	K	N/A	N/A	N/A	N/A	N/A	N/A
chr10	91400604	91400939	336	160	91400764	11	91.84	23.08	D	N/A	N/A	N/A	N/A	N/A	N/A
chr10	91450874	91451654	781	336	91451210	189	2481.09	226.8	P	N/A	N/A	N/A	N/A	N/A	N/A
chr10	91534834	91535328	495	278	91535112	14	120.21	38.31	J	chr10	91534706	91535322	MER51A	LTR	ERV1
chr10	93062138	93062616	479	245	93062383	45	422.16	63.46	D	chr10	93062259	93062554	MLT1H1	LTR	MaLR
chr10	93296229	93296543	315	206	93296435	11	96.78	29.95	D	N/A	N/A	N/A	N/A	N/A	N/A
chr10	93299022	93299271	250	147	93299169	13	131.83	34.73	D	chr10	93298944	93299175	MLT1L	LTR	MaLR
chr10	94342511	94343159	649	297	94342808	94	933.93	96.13	K	N/A	N/A	N/A	N/A	N/A	N/A
chr10	94406416	94406704	289	118	94406534	16	181.75	42.14	D	chr10	94406085	94406704	L1M4	LINE	L1
chr10	94503233	94503558	326	143	94503376	14	109.13	25.19	R	N/A	N/A	N/A	N/A	N/A	N/A
chr10	94509023	94509349	327	200	94509223	71	713.68	57.1	E	chr10	94508914	94509300	MLT1L	LTR	MaLR
chr10	94582975	94583404	430	232	94583207	25	172.02	27.19	N	chr10	94583102	94583305	MLT1H	LTR	MaLR
chr10	94821421	94822028	608	399	94821820	54	486.3	48.73	U	N/A	N/A	N/A	N/A	N/A	N/A
chr10	94836020	94836392	373	179	94836199	13	122.61	36.8	D	N/A	N/A	N/A	N/A	N/A	N/A
chr10	94998303	94998781	479	218	94998521	16	105.86	24.68	T	N/A	N/A	N/A	N/A	N/A	N/A
chr10	95246102	95246597	496	192	95246294	35	219.99	28.98	V	N/A	N/A	N/A	N/A	N/A	N/A
chr10	95247212	95247450	239	129	95247341	12	120.77	31.49	U	N/A	N/A	N/A	N/A	N/A	N/A
chr10	95595571	95595922	352	69	95595640	10	91.43	19.15	J	chr10	95594749	95596172	LTR12C	LTR	ERV1
chr10	95665152	95665738	587	339	95665491	46	490.36	83.01	D	chr10	95665313	95665680	MLT1L	LTR	MaLR
chr10	95697401	95697648	248	116	95697517	17	207.88	61.29	D	N/A	N/A	N/A	N/A	N/A	N/A
chr10	96049196	96049586	391	280	96049476	26	209.81	40.29	D	N/A	N/A	N/A	N/A	N/A	N/A
chr10	96151848	96152228	381	222	96152070	15	101.81	22.08	S	N/A	N/A	N/A	N/A	N/A	N/A
chr10	97055792	97056194	403	114	97055906	13	98.5	20.76	D	N/A	N/A	N/A	N/A	N/A	N/A
chr10	97310913	97311539	627	328	97311241	49	460.31	70.84	U	N/A	N/A	N/A	N/A	N/A	N/A
chr10	97443401	97443983	583	388	97443789	84	828.25	62.81	U	N/A	N/A	N/A	N/A	N/A	N/A
chr10	97505055	97505524	470	294	97505349	26	209.81	34.31	D	N/A	N/A	N/A	N/A	N/A	N/A
chr10	97792778	97793645	868	472	97793250	167	2036.27	184.01	S	N/A	N/A	N/A	N/A	N/A	N/A
chr10	97822438	97822822	385	271	97822709	18	154.27	32.23	D	N/A	N/A	N/A	N/A	N/A	N/A
chr10	97880110	97880532	423	311	97880421	17	101.03	15.15	K	N/A	N/A	N/A	N/A	N/A	N/A
chr10	98086808	98087205	398	241	98087049	21	149.27	22.54	D	chr10	98086747	98087204	MLT1K	LTR	MaLR
chr10	98263579	98264057	479	187	98263766	28	220.05	33.12	D	N/A	N/A	N/A	N/A	N/A	N/A
chr10	98868835	98869096	262	145	98868980	15	165.84	44.07	D	N/A	N/A	N/A	N/A	N/A	N/A
chr10	98877279	98877748	470	180	98877459	26	226.14	46.84	D	N/A	N/A	N/A	N/A	N/A	N/A
chr10	99041823	99042887	1065	630	99042453	385	3100	340.2	B	N/A	N/A	N/A	N/A	N/A	N/A
chr10	99166120	99166510	391	148	99166268	13	98.5	25.18	D	N/A	N/A	N/A	N/A	N/A	N/A
chr10	99195417	99196138	722	387	99195804	88	802.2	86.77	U	N/A	N/A	N/A	N/A	N/A	N/A
chr10	99247295	99247942	648	290	99247585	84	769.38	77.05	B	N/A	N/A	N/A	N/A	N/A	N/A
chr10	99382948	99383594	647	334	99383282	99	972.43	94.03	U	N/A	N/A	N/A	N/A	N/A	N/A
chr10	99389906	99390667	762	493	99390399	168	2146.08	139.85	V	N/A	N/A	N/A	N/A	N/A	N/A
chr10	99436692	99437347	656	296	99436988	47	267.44	25.76	B	N/A	N/A	N/A	N/A	N/A	N/A
chr10	99439114	99439641	528	299	99439413	26	128.67	15.69	E	N/A	N/A	N/A	N/A	N/A	N/A
chr10	99546474	99546845	372	156	99546630	31	322.72	64.69	D	chr10	99546519	99546805	MLT1L	LTR	MaLR
chr10	99554163	99554536	374	263	99554426	19	202.3	52.27	D	N/A	N/A	N/A	N/A	N/A	N/A
chr10	99816978	99817224	247	138	99817116	11	111.67	31.82	D	chr10	99816981	99817432	MLT1K	LTR	MaLR
chr10	100110814	100111150	337	187	100111001	16	103.94	13.02	T	chr10	100110834	100111180	MLT1F1	LTR	MaLR
chr10	100675197	100675657	461	146	100675343	18	154.27	32.66	D	chr10	100675075	100675817	L1MDa	LINE	L1
chr10	101180037	101181054	1018	508	101180545	441	3100	254.75	K	N/A	N/A	N/A	N/A	N/A	N/A
chr10	101359822	101360146	325	200	101360022	12	96.86	24.77	D	N/A	N/A	N/A	N/A	N/A	N/A
chr10	101370016	101370867	852	418	101370434	283	3100	179.58	B	N/A	N/A	N/A	N/A	N/A	N/A
chr10	101374894	101375490	597	100	101374994	45	480.75	86.94	E	chr10	101374693	101375256	LTR12_	LTR	ERV1
chr10	101408784	101409523	740	315	101409099	120	1315.64	86.94	U	N/A	N/A	N/A	N/A	N/A	N/A
chr10	102017130	102017709	580	339	102017469	32	213.67	28.39	U	N/A	N/A	N/A	N/A	N/A	N/A
chr10	102096516	102097018	503	267	102096783	81	996.02	120.94	P	N/A	N/A	N/A	N/A	N/A	N/A
chr10	102122923	102123690	768	328	102123251	130	1297.35	95.68	K	N/A	N/A	N/A	N/A	N/A	N/A
chr10	102231056	102231970	915	399	102231455	294	3100	381.74	J	N/A	N/A	N/A	N/A	N/A	N/A
chr10	102662287	102663303	1017	327	102662614	117	1017.64	86.77	V	N/A	N/A	N/A	N/A	N/A	N/A
chr10	102780575	102781669	1095	368	102780943	329	3100	353.3	J	N/A	N/A	N/A	N/A	N/A	N/A
chr10	103337725	103338082	358	235	103337960	15	91.75	18.89	V	N/A	N/A	N/A	N/A	N/A	N/A
chr10	103338622	103339251	630	312	103338934	140	2216.31	356.98	U	N/A	N/A	N/A	N/A	N/A	N/A
chr10	103397602	103397916	315	201	103397803	13	120.5	32.95	D	N/A	N/A	N/A	N/A	N/A	N/A
chr10	103567244	103567579	336	182	103567426	14	95.45	18.89	K	N/A	N/A	N/A	N/A	N/A	N/A
chr10	103868906	103869956	1051	590	103869496	279	3100	309.14	N	N/A	N/A	N/A	N/A	N/A	N/A
chr10	103975612	103976266	655	376	103975988	82	796.6	83.35	T	N/A	N/A	N/A	N/A	N/A	N/A
chr10	103991247	103991778	532	226	103991473	23	143.03	28.98	R	N/A	N/A	N/A	N/A	N/A	N/A
chr10	103994598	103995595	998	603	103995201	193	2146.85	115.93	S	N/A	N/A	N/A	N/A	N/A	N/A
chr10	104143760	104144601	842	416	104144176	117	1334.14	152.42	V	N/A	N/A	N/A	N/A	N/A	N/A
chr10	104210794	104211405	612	312	104211106	91	970.66	98.21	T	N/A	N/A	N/A	N/A	N/A	N/A
chr10	104251672	104252722	1051	272	104251944	219	2243.7	127.79	K	N/A	N/A	N/A	N/A	N/A	N/A
chr10	104253416	104253901	486	213	104253629	29	198.29	29.72	B	N/A	N/A	N/A	N/A	N/A	N/A
chr10	104349050	104349566	517	253	104349303	24	125.01	18.74	T	N/A	N/A	N/A	N/A	N/A	N/A
chr10	104391669	104392228	560	316	104391985	31	189.5	29.63	P	N/A	N/A	N/A	N/A	N/A	N/A
chr10	104420603	104421071	469	241	104420844	75	769.86	80.55	J	N/A	N/A	N/A	N/A	N/A	N/A
chr10	104463976	104464525	550	306	104464282	44	391.45	49.68	N	N/A	N/A	N/A	N/A	N/A	N/A
chr10	104493065	104493870	806	430	104493495	261	3100	267.92	S	N/A	N/A	N/A	N/A	N/A	N/A
chr10	104667385	104668517	1133	604	104667989	374	3100	164.06	V	N/A	N/A	N/A	N/A	N/A	N/A
chr10	104946898	104947374	477	176	104947074	19	102.42	17.75	E	N/A	N/A	N/A	N/A	N/A	N/A
chr10	105012059	105012475	417	160	105012219	41	519.57	125.33	D	chr10	105011973	105012274	MLT1J2	LTR	MaLR
chr10	105145780	105146666	887	491	105146271	165	1704.95	138.62	K	N/A	N/A	N/A	N/A	N/A	N/A
chr10	105225105	105225660	556	249	105225354	22	174.06	44.69	D	N/A	N/A	N/A	N/A	N/A	N/A
chr10	105396096	105396417	322	106	105396202	21	179.76	29.44	J	N/A	N/A	N/A	N/A	N/A	N/A
chr10	105407803	105408121	319	145	105407948	13	133.3	41.67	D	N/A	N/A	N/A	N/A	N/A	N/A
chr10	105486431	105486940	510	267	105486698	61	656.52	99.08	J	chr10	105486563	105487055	MLT1K	LTR	MaLR
chr10	105522236	105522564	329	155	105522391	16	138.09	30.45	T	N/A	N/A	N/A	N/A	N/A	N/A
chr10	105549776	105550295	520	269	105550045	71	948.22	196.43	D	chr10	105550031	105550420	MLT1K	LTR	MaLR
chr10	105871387	105872059	673	337	105871724	66	699.41	84.31	U	N/A	N/A	N/A	N/A	N/A	N/A
chr10	105981775	105982509	735	388	105982163	88	1074.17	166.02	T	N/A	N/A	N/A	N/A	N/A	N/A
chr10	105995528	105995922	395	157	105995685	32	393.57	114.92	J	chr10	105994734	105996106	LTR12C	LTR	ERV1
chr10	106089662	106090244	583	274	106089936	23	128.25	25.53	N	chr10	106089914	106090091	L2	LINE	L2
chr10	111449617	111449904	288	112	111449729	12	126.41	34.47	J	chr10	111449470	111450370	LTR12D	LTR	ERV1
chr10	111648890	111649235	346	179	111649069	53	613.08	64.4	D	chr10	111648896	111649307	MLT1J2	LTR	MaLR
chr10	111759848	111760164	317	151	111759999	15	123.27	27.91	N	N/A	N/A	N/A	N/A	N/A	N/A
chr10	111823939	111824478	540	301	111824240	40	322.68	53.13	R	N/A	N/A	N/A	N/A	N/A	N/A
chr10	111899817	111900079	263	156	111899973	10	99.03	30.51	D	N/A	N/A	N/A	N/A	N/A	N/A
chr10	111903176	111903556	381	153	111903329	22	182.92	37.65	J	N/A	N/A	N/A	N/A	N/A	N/A
chr10	111960635	111961402	768	424	111961059	273	3100	283.37	N	N/A	N/A	N/A	N/A	N/A	N/A
chr10	112054529	112054946	418	226	112054755	19	130.15	20.61	B	N/A	N/A	N/A	N/A	N/A	N/A
chr10	112082101	112082414	314	117	112082218	27	343.05	99.59	J	chr10	112081018	112082647	LTR12C	LTR	ERV1
chr10	112316837	112317344	508	246	112317083	30	197.96	27.12	S	N/A	N/A	N/A	N/A	N/A	N/A
chr10	112621441	112621864	424	191	112621632	47	467.63	63.54	S	N/A	N/A	N/A	N/A	N/A	N/A
chr10	112668778	112669404	627	337	112669115	44	395.73	57.96	S	N/A	N/A	N/A	N/A	N/A	N/A
chr10	114099873	114100299	427	234	114100107	40	510.85	114.92	J	chr10	114099321	114100620	LTR12E	LTR	ERV1
chr10	114121883	114122306	424	267	114122150	27	307.54	88.1	J	chr10	114121329	114122418	LTR12C	LTR	ERV1
chr10	114474109	114474456	348	141	114474250	13	128.9	34.47	D	N/A	N/A	N/A	N/A	N/A	N/A
chr10	114505458	114505909	452	217	114505675	14	125.74	38.31	D	N/A	N/A	N/A	N/A	N/A	N/A
chr10	114592643	114593166	524	264	114592907	24	167.15	31.28	T	chr10	114592853	114592992	MLT2E	LTR	ERVL
chr10	114643493	114643840	348	128	114643621	18	154.27	35.86	D	chr10	114643539	114643907	MLT1J2	LTR	MaLR
chr10	114828111	114828311	201	101	114828212	13	180.49	49.8	D	chr10	114828151	114828415	AluJo	SINE	Alu
chr10	114903083	114903577	495	313	114903396	24	180.15	39.63	D	chr10	114903325	114903482	MLT1J2	LTR	MaLR
chr10	114912898	114913181	284	113	114913011	12	120.59	30.51	D	N/A	N/A	N/A	N/A	N/A	N/A
chr10	115045289	115045690	402	258	115045547	22	240.35	65.12	D	N/A	N/A	N/A	N/A	N/A	N/A
chr10	115502798	115503121	324	113	115502911	25	253.9	49.18	D	N/A	N/A	N/A	N/A	N/A	N/A
chr10	115923587	115924458	872	432	115924019	233	3100	304.84	U	N/A	N/A	N/A	N/A	N/A	N/A
chr10	116005036	116005418	383	166	116005202	43	581.08	122.58	D	chr10	116004824	116005241	MLT1K	LTR	MaLR
chr10	116102503	116103133	631	332	116102835	49	518.84	105.91	J	chr10	116102654	116103166	MLT1K	LTR	MaLR
chr10	116642997	116643426	430	249	116643246	16	131.21	33.23	J	N/A	N/A	N/A	N/A	N/A	N/A
chr10	118019323	118019591	269	134	118019457	11	116.65	34.47	D	N/A	N/A	N/A	N/A	N/A	N/A
chr10	118143503	118143749	247	165	118143668	10	107.44	34.47	J	chr10	118142723	118144244	LTR12C	LTR	ERV1
chr10	118359113	118359512	400	188	118359301	27	314.41	68.95	D	N/A	N/A	N/A	N/A	N/A	N/A
chr10	118533561	118533937	377	204	118533765	49	689.58	137.9	D	chr10	118533641	118533787	MLT1J2	LTR	MaLR
chr10	118927598	118927990	393	253	118927851	39	438.42	78.46	D	chr10	118927805	118927915	MLT1I	LTR	MaLR
chr10	118968164	118968702	539	207	118968371	50	576.74	109.49	J	chr10	118968116	118968497	MER51E	LTR	ERV1
chr10	118976318	118976642	325	208	118976526	38	475.09	91.6	D	N/A	N/A	N/A	N/A	N/A	N/A
chr10	119102300	119102509	210	106	119102406	10	108.28	28.62	G	chr10	119102206	119102509	LTR8A	LTR	ERV1
chr10	119124711	119125289	579	311	119125022	45	358	45.46	N	N/A	N/A	N/A	N/A	N/A	N/A
chr10	119172014	119172324	311	215	119172229	11	91.84	21.36	D	N/A	N/A	N/A	N/A	N/A	N/A
chr10	119174352	119174824	473	282	119174634	25	234.78	51.52	D	chr10	119174592	119174783	MLT1K	LTR	MaLR
chr10	119448322	119448632	311	132	119448454	34	407.56	77.45	D	chr10	119448141	119448613	MLT1J	LTR	MaLR
chr10	119646063	119646423	361	132	119646195	43	498.94	81.37	J	chr10	119646154	119646256	MLT1K	LTR	MaLR
chr10	120091533	120092182	650	318	120091851	94	1105.77	143.83	U	N/A	N/A	N/A	N/A	N/A	N/A
chr10	120248139	120248417	279	173	120248312	15	150.42	37.21	D	chr10	120248076	120248411	MLT1K	LTR	MaLR
chr10	120533218	120533528	311	75	120533293	10	96.99	34.47	J	chr10	120532219	120533726	LTR12C	LTR	ERV1
chr10	120572668	120573127	460	255	120572923	19	172.95	45.08	D	chr10	120572884	120573086	MLT1L	LTR	MaLR
chr10	120696788	120697131	344	230	120697018	17	134.54	29.72	J	chr10	120696870	120697030	MLT1H	LTR	MaLR
chr10	120743312	120743752	441	171	120743483	19	190.73	45.97	J	N/A	N/A	N/A	N/A	N/A	N/A
chr10	120778198	120779366	1169	730	120778928	184	2412.9	349.21	J	N/A	N/A	N/A	N/A	N/A	N/A
chr10	120911248	120911645	398	247	120911495	21	141.08	19.04	R	N/A	N/A	N/A	N/A	N/A	N/A
chr10	120918328	120918729	402	224	120918552	18	161.18	42.46	E	N/A	N/A	N/A	N/A	N/A	N/A
chr10	121128122	121128688	567	329	121128451	52	586.11	108.77	D	N/A	N/A	N/A	N/A	N/A	N/A
chr10	121346442	121346920	479	304	121346746	23	148.81	18.51	N	N/A	N/A	N/A	N/A	N/A	N/A
chr10	121639863	121640371	509	209	121640072	22	217.75	65.12	R	chr10	121639802	121640377	LTR12	LTR	ERV1
chr10	121722743	121723164	422	195	121722938	16	155	45.97	J	chr10	121722587	121723179	MER51A	LTR	ERV1
chr10	121755382	121755783	402	224	121755606	30	244.35	44.65	D	chr10	121755230	121755733	MLT1L	LTR	MaLR
chr10	122000969	122001236	268	75	122001044	12	130.3	42.14	J	chr10	122000696	122001581	LTR12C	LTR	ERV1
chr10	122186041	122186485	445	330	122186371	42	529.14	114.09	D	chr10	122186030	122186476	MLT1K	LTR	MaLR
chr10	122357852	122358192	341	145	122357997	12	117.34	34.47	D	chr10	122357796	122358301	MLT1K	LTR	MaLR
chr10	122673961	122674196	236	132	122674093	17	211.01	61.29	J	chr10	122673143	122674469	LTR12C	LTR	ERV1
chr10	122782002	122782630	629	309	122782311	53	644	168.54	D	chr10	122782159	122782454	MLT1K	LTR	MaLR
chr10	122864341	122864687	347	100	122864441	16	155.27	38.31	D	chr10	122864350	122864828	MLT1K	LTR	MaLR
chr10	123017099	123017454	356	242	123017341	12	115.04	34.47	D	N/A	N/A	N/A	N/A	N/A	N/A
chr10	123347887	123348302	416	201	123348088	71	1016.84	186.77	D	N/A	N/A	N/A	N/A	N/A	N/A
chr10	123668254	123668536	283	160	123668414	14	154.74	38.31	J	chr10	123668289	123668810	LTR12	LTR	ERV1
chr10	123727188	123727492	305	112	123727300	13	136.54	45.97	E	chr10	123726884	123728435	LTR12C	LTR	ERV1
chr10	123768795	123769221	427	206	123769001	15	126.78	44.16	D	N/A	N/A	N/A	N/A	N/A	N/A
chr10	124026263	124026797	535	274	124026537	30	322.52	76.61	D	N/A	N/A	N/A	N/A	N/A	N/A
chr10	124292423	124292662	240	85	124292508	11	122.34	38.31	D	chr10	124292493	124292542	MLT1K	LTR	MaLR
chr10	124762293	124762512	220	111	124762404	11	122.76	42.14	E	chr10	124761936	124763566	LTR12C	LTR	ERV1
chr10	124846638	124847068	431	137	124846775	27	204	36.48	D	N/A	N/A	N/A	N/A	N/A	N/A
chr10	124849547	124849922	376	220	124849767	22	246.79	65.12	J	N/A	N/A	N/A	N/A	N/A	N/A
chr10	124903381	124904314	934	436	124903817	135	1337.79	99.07	S	N/A	N/A	N/A	N/A	N/A	N/A
chr10	125044992	125045672	681	350	125045342	50	521.51	105.26	D	chr10	125045287	125045473	MLT1J2	LTR	MaLR
chr10	125264796	125265291	496	257	125265053	15	131.78	42.14	D	chr10	125264996	125265097	MLT1J2	LTR	MaLR
chr10	125298266	125298711	446	195	125298461	43	552.57	137.9	D	N/A	N/A	N/A	N/A	N/A	N/A
chr10	125651083	125651530	448	222	125651305	29	330.62	84.27	J	chr10	125651099	125651511	MER101	LTR	ERV1
chr10	125723821	125724193	373	220	125724041	27	301.57	67.26	D	chr10	125723918	125724261	MLT1H	LTR	MaLR
chr10	126034982	126035584	603	297	126035279	34	320.8	65.83	D	chr10	126035062	126035578	MLT1K	LTR	MaLR
chr10	126097164	126098070	907	375	126097539	165	1956.32	165.36	B	N/A	N/A	N/A	N/A	N/A	N/A
chr10	126307215	126307584	370	195	126307410	15	125.06	30.91	D	chr10	126307163	126307582	LTR16A1	LTR	ERVL
chr10	126595091	126595649	559	267	126595358	78	896.03	113.15	S	N/A	N/A	N/A	N/A	N/A	N/A
chr10	126872097	126872486	390	131	126872228	20	203.11	50.23	D	chr10	126871938	126872388	MLT1K	LTR	MaLR
chr10	126963410	126963875	466	195	126963605	15	135.84	38.31	D	chr10	126963355	126963784	MLT1J	LTR	MaLR
chr10	127041400	127041830	431	303	127041703	92	1467.32	314.1	D	chr10	127041678	127041743	MLT1I	LTR	MaLR
chr10	129814348	129815060	713	387	129814735	167	2675.44	426.9	B	N/A	N/A	N/A	N/A	N/A	N/A
chr10	129838364	129838821	458	294	129838658	31	293.08	51.91	D	N/A	N/A	N/A	N/A	N/A	N/A
chr10	129841533	129841880	348	88	129841621	10	91.44	22.73	D	N/A	N/A	N/A	N/A	N/A	N/A
chr10	130346936	130347293	358	132	130347068	12	108.25	27.12	D	chr10	130346963	130347089	MER81	DNA	AcHobo
chr10	130469900	130470271	372	245	130470145	54	773.64	176.65	D	chr10	130470060	130470376	MLT1I	LTR	MaLR
chr10	130705253	130705636	384	192	130705445	14	135.76	38.31	D	N/A	N/A	N/A	N/A	N/A	N/A
chr10	131092161	131092769	609	320	131092481	31	314.23	92	D	chr10	131092334	131092546	MLT1J	LTR	MaLR
chr10	131798734	131799865	1132	666	131799400	441	3100	309.14	U	N/A	N/A	N/A	N/A	N/A	N/A
chr10	131799883	131800194	312	109	131799992	13	96.07	25.76	U	N/A	N/A	N/A	N/A	N/A	N/A
chr10	132167283	132167883	601	302	132167585	57	702.91	114.49	D	N/A	N/A	N/A	N/A	N/A	N/A
chr10	132395518	132395990	473	288	132395806	22	220.92	55.2	D	chr10	132395502	132395866	MLT1J1	LTR	MaLR
chr10	133192381	133192797	417	231	133192612	20	208.99	49.8	D	chr10	133192572	133192729	MLT1I	LTR	MaLR
chr10	133339673	133340232	560	297	133339970	55	689.38	144.26	D	N/A	N/A	N/A	N/A	N/A	N/A
chr10	133472406	133472699	294	181	133472587	12	112.24	34.47	J	N/A	N/A	N/A	N/A	N/A	N/A
chr10	133492925	133493352	428	195	133493120	12	96.19	32.2	D	N/A	N/A	N/A	N/A	N/A	N/A
chr10	133645381	133645622	242	117	133645498	12	117.77	30.15	B	N/A	N/A	N/A	N/A	N/A	N/A
chr10	133665062	133665690	629	293	133665355	29	207.61	29.72	T	chr10	133665000	133665535	MER51A	LTR	ERV1
chr10	133934336	133934633	298	115	133934451	10	97.11	33.12	D	N/A	N/A	N/A	N/A	N/A	N/A
chr10	133998535	133999467	933	271	133998806	80	850.14	82.22	E	chr10	133998592	133998832	LTR71B	LTR	ERV1
chr10	134200721	134201202	482	271	134200992	18	125	21.12	T	N/A	N/A	N/A	N/A	N/A	N/A
chr10	134942380	134942667	288	123	134942503	16	116.07	16.32	T	N/A	N/A	N/A	N/A	N/A	N/A
chr10	134984431	134984778	348	133	134984564	28	346.66	76.61	J	chr10	134984356	134984937	LTR12	LTR	ERV1
chr10	135117139	135117514	376	195	135117334	19	93.5	14.31	J	N/A	N/A	N/A	N/A	N/A	N/A
chr11	319092	320171	1080	583	319675	405	3100	224.83	N	chr11	319236	319833	LTR71B	LTR	ERV1
chr11	359355	359647	293	116	359471	29	313.3	52.4	D	N/A	N/A	N/A	N/A	N/A	N/A
chr11	430020	430442	423	242	430262	15	94.52	18.16	D	N/A	N/A	N/A	N/A	N/A	N/A
chr11	440077	440529	453	143	440220	25	120.6	17.06	K	N/A	N/A	N/A	N/A	N/A	N/A
chr11	496993	497290	298	166	497159	21	131.22	18.64	N	N/A	N/A	N/A	N/A	N/A	N/A
chr11	525298	526234	937	352	525650	247	3188.17	218.85	U	N/A	N/A	N/A	N/A	N/A	N/A
chr11	550106	551507	1402	816	550922	383	3100	263.36	U	N/A	N/A	N/A	N/A	N/A	N/A
chr11	558130	558920	791	418	558548	169	1879.31	142.97	U	N/A	N/A	N/A	N/A	N/A	N/A
chr11	566080	566599	520	114	566194	33	211.16	20.7	K	N/A	N/A	N/A	N/A	N/A	N/A
chr11	737013	737698	686	393	737406	106	1160.77	118.77	S	N/A	N/A	N/A	N/A	N/A	N/A
chr11	799449	800259	811	399	799848	221	2673.68	152.78	L	N/A	N/A	N/A	N/A	N/A	N/A
chr11	809194	809751	558	297	809491	66	599.37	63.73	V	N/A	N/A	N/A	N/A	N/A	N/A
chr11	809927	810424	498	186	810113	28	159.89	14.72	U	N/A	N/A	N/A	N/A	N/A	N/A
chr11	849541	850208	668	329	849870	116	1391.39	149.14	D	N/A	N/A	N/A	N/A	N/A	N/A
chr11	866035	866215	181	91	866126	10	91.73	13.56	T	N/A	N/A	N/A	N/A	N/A	N/A
chr11	909103	909710	608	302	909405	33	189.23	26.51	J	N/A	N/A	N/A	N/A	N/A	N/A
chr11	1367185	1367769	585	213	1367398	62	784.59	142.73	D	N/A	N/A	N/A	N/A	N/A	N/A
chr11	1375817	1376318	502	325	1376142	21	119.77	18.68	D	N/A	N/A	N/A	N/A	N/A	N/A
chr11	1419826	1420523	698	288	1420114	116	1696	323.86	J	N/A	N/A	N/A	N/A	N/A	N/A
chr11	1542264	1542909	646	275	1542539	157	2260.86	240.6	J	N/A	N/A	N/A	N/A	N/A	N/A
chr11	1549773	1550603	831	392	1550165	133	1737.63	252.25	J	N/A	N/A	N/A	N/A	N/A	N/A
chr11	1849028	1849506	479	297	1849325	23	161.37	29.97	D	N/A	N/A	N/A	N/A	N/A	N/A
chr11	1967640	1968154	515	222	1967862	28	186.13	28.01	D	N/A	N/A	N/A	N/A	N/A	N/A
chr11	1975652	1976051	400	220	1975872	14	112.85	19.18	D	N/A	N/A	N/A	N/A	N/A	N/A
chr11	2248839	2249083	245	117	2248956	13	123.46	29.44	D	N/A	N/A	N/A	N/A	N/A	N/A
chr11	2256560	2256854	295	98	2256658	22	202.97	38	D	chr11	2255630	2257179	L1MEc	LINE	L1
chr11	2380107	2380403	297	135	2380242	14	96.74	18.62	E	N/A	N/A	N/A	N/A	N/A	N/A
chr11	2677298	2678470	1173	573	2677871	468	3100	300.55	B	N/A	N/A	N/A	N/A	N/A	N/A
chr11	2845277	2845730	454	262	2845539	32	201.38	27.64	T	N/A	N/A	N/A	N/A	N/A	N/A
chr11	2863509	2863994	486	237	2863746	34	231.36	36.8	T	chr11	2863701	2863749	(CCCCG)n	Simple_repeat	Simple_repeat
chr11	2896739	2897168	430	296	2897035	23	193.73	37.66	D	chr11	2896864	2897036	MLT1K	LTR	MaLR
chr11	2969868	2970657	790	384	2970252	163	1534.86	86.17	N	N/A	N/A	N/A	N/A	N/A	N/A
chr11	2984749	2985099	351	236	2984985	14	118.84	34.53	D	N/A	N/A	N/A	N/A	N/A	N/A
chr11	3166525	3166758	234	118	3166643	11	91.03	22.1	D	N/A	N/A	N/A	N/A	N/A	N/A
chr11	3323371	3323976	606	309	3323680	64	675.47	111.63	T	N/A	N/A	N/A	N/A	N/A	N/A
chr11	3355086	3355637	552	268	3355354	34	235.07	35.78	P	N/A	N/A	N/A	N/A	N/A	N/A
chr11	3356500	3357401	902	532	3357032	274	3100	183.57	K	N/A	N/A	N/A	N/A	N/A	N/A
chr11	3633166	3633737	572	334	3633500	42	383.31	58.94	Q	chr11	3633493	3633647	MLT1K	LTR	MaLR
chr11	3775062	3776039	978	345	3775407	319	3100	113.35	B	N/A	N/A	N/A	N/A	N/A	N/A
chr11	3832707	3833081	375	200	3832907	40	309.16	34	P	N/A	N/A	N/A	N/A	N/A	N/A
chr11	4072297	4072720	424	181	4072478	49	296.9	21.9	S	N/A	N/A	N/A	N/A	N/A	N/A
chr11	4585709	4586684	976	379	4586088	242	2644.61	128.81	U	N/A	N/A	N/A	N/A	N/A	N/A
chr11	4597322	4597653	332	166	4597488	50	560.5	73.55	D	chr11	4597292	4597640	LTR71B	LTR	ERV1
chr11	4740960	4741268	309	115	4741075	10	95.47	25.76	D	N/A	N/A	N/A	N/A	N/A	N/A
chr11	4985377	4985721	345	197	4985574	33	382.39	85.87	J	chr11	4985286	4986014	LTR8A	LTR	ERV1
chr11	5164770	5165111	342	167	5164937	13	114.68	29.37	D	N/A	N/A	N/A	N/A	N/A	N/A
chr11	5171627	5171993	367	261	5171888	18	174.53	42.94	J	chr11	5171439	5172222	LTR12D	LTR	ERV1
chr11	5256615	5256890	276	119	5256734	87	1228.67	127.11	L	N/A	N/A	N/A	N/A	N/A	N/A
chr11	5381965	5382295	331	222	5382187	11	96.1	18.62	M	chr11	5381920	5382830	LTR12	LTR	ERV1
chr11	5569364	5569787	424	206	5569570	38	423.56	90.11	T	chr11	5569469	5569779	LTR45B	LTR	ERV1
chr11	5602466	5603058	593	319	5602785	54	393.45	44.8	T	N/A	N/A	N/A	N/A	N/A	N/A
chr11	5661376	5661798	423	314	5661690	29	278.52	66.79	V	chr11	5660570	5661987	LTR12C	LTR	ERV1
chr11	5662474	5663122	649	453	5662927	69	503.76	38.36	U	N/A	N/A	N/A	N/A	N/A	N/A
chr11	6212239	6213071	833	272	6212511	108	866.47	65.39	B	N/A	N/A	N/A	N/A	N/A	N/A
chr11	6454284	6454832	549	264	6454548	32	224.19	36.8	R	N/A	N/A	N/A	N/A	N/A	N/A
chr11	6595791	6596197	407	306	6596097	20	111.4	21.08	V	N/A	N/A	N/A	N/A	N/A	N/A
chr11	6671877	6672181	305	117	6671994	17	177.33	47.12	N	chr11	6671507	6672100	LTR8	LTR	ERV1
chr11	6903861	6904545	685	305	6904166	38	189.63	19.82	S	N/A	N/A	N/A	N/A	N/A	N/A
chr11	6939948	6940232	285	162	6940110	21	178.22	34.87	J	chr11	6939816	6940242	LTR33	LTR	ERVL
chr11	7965105	7965645	541	263	7965368	72	767.48	79.4	V	N/A	N/A	N/A	N/A	N/A	N/A
chr11	8184088	8184649	562	360	8184448	36	186.53	15.27	T	N/A	N/A	N/A	N/A	N/A	N/A
chr11	8313401	8313754	354	113	8313514	14	95.92	16.42	D	N/A	N/A	N/A	N/A	N/A	N/A
chr11	8679380	8679762	383	111	8679491	20	169.24	35.53	T	chr11	8679204	8679786	LTR9B	LTR	ERV1
chr11	8700312	8700640	329	116	8700428	15	133.99	28.92	D	N/A	N/A	N/A	N/A	N/A	N/A
chr11	8728790	8729604	815	280	8729070	48	483.73	89.45	J	chr11	8729058	8729841	LTR12C	LTR	ERV1
chr11	8889132	8889519	388	146	8889278	16	110.52	25.76	V	N/A	N/A	N/A	N/A	N/A	N/A
chr11	8982002	8982484	483	198	8982200	63	644.82	86.94	U	chr11	8982186	8982210	GC_rich	Low_complexity	Low_complexity
chr11	9074425	9075048	624	304	9074729	44	492.3	135.96	D	chr11	9074593	9074882	MLT1K	LTR	MaLR
chr11	9438395	9439627	1233	683	9439078	624	3100	137.16	K	N/A	N/A	N/A	N/A	N/A	N/A
chr11	9529934	9530548	615	472	9530406	38	152.23	15.84	U	N/A	N/A	N/A	N/A	N/A	N/A
chr11	9551210	9551892	683	539	9551749	118	1239.96	66.44	P	N/A	N/A	N/A	N/A	N/A	N/A
chr11	10134620	10134856	237	129	10134749	13	151.03	45.97	D	chr11	10133996	10134759	MER52A	LTR	ERV1
chr11	10300972	10301358	387	258	10301230	20	141.32	27.37	J	N/A	N/A	N/A	N/A	N/A	N/A
chr11	10406523	10406940	418	287	10406810	41	397.29	48.46	J	N/A	N/A	N/A	N/A	N/A	N/A
chr11	10642434	10643073	640	373	10642807	185	2332.92	183.04	J	chr11	10642772	10643169	MLT1K	LTR	MaLR
chr11	10694858	10695473	616	273	10695131	118	1239.08	118.41	T	chr11	10695019	10695403	MLT1L	LTR	MaLR
chr11	10728837	10729501	665	216	10729053	44	273.82	34.35	S	N/A	N/A	N/A	N/A	N/A	N/A
chr11	10786811	10787561	751	346	10787157	137	1133.87	59.1	B	N/A	N/A	N/A	N/A	N/A	N/A
chr11	10835784	10836693	910	506	10836290	111	812.88	47.08	K	N/A	N/A	N/A	N/A	N/A	N/A
chr11	10886570	10887105	536	254	10886824	34	296.35	51.52	T	chr11	10886602	10887218	MER51A	LTR	ERV1
chr11	10962162	10962994	833	460	10962622	260	3208.93	182.4	J	chr11	10962533	10962735	MLT1J	LTR	MaLR
chr11	11282804	11283122	319	115	11282919	21	214.75	42.94	D	chr11	11282873	11283103	MLT1I	LTR	MaLR
chr11	11599942	11600540	599	338	11600280	85	989.5	119.04	J	N/A	N/A	N/A	N/A	N/A	N/A
chr11	11809494	11810045	552	139	11809633	42	465.76	70.84	J	chr11	11809443	11809871	LTR12B	LTR	ERV1
chr11	11821438	11821686	249	141	11821579	14	105.75	19.7	K	N/A	N/A	N/A	N/A	N/A	N/A
chr11	11835787	11836272	486	382	11836169	64	759.64	63.23	G	chr11	11835707	11836369	MER51A	LTR	ERV1
chr11	12088275	12088770	496	352	12088627	38	226.36	20.24	R	N/A	N/A	N/A	N/A	N/A	N/A
chr11	12142614	12143014	401	287	12142901	27	205.66	29.95	R	N/A	N/A	N/A	N/A	N/A	N/A
chr11	12255036	12255828	793	402	12255438	146	1597.02	123.82	D	chr11	12255107	12255598	MLT1H	LTR	MaLR
chr11	12973317	12973887	571	338	12973655	149	1704.72	116.55	T	chr11	12973275	12973691	MLT1K	LTR	MaLR
chr11	13092873	13093427	555	239	13093112	84	719.35	56.24	D	N/A	N/A	N/A	N/A	N/A	N/A
chr11	13126085	13126382	298	166	13126251	11	106.85	31.33	D	chr11	13126142	13126326	MLT1K	LTR	MaLR
chr11	13255235	13256153	919	419	13255654	231	3142.51	225.91	J	N/A	N/A	N/A	N/A	N/A	N/A
chr11	13418179	13418646	468	250	13418429	37	320.14	46.37	J	N/A	N/A	N/A	N/A	N/A	N/A
chr11	13465065	13465415	351	237	13465302	24	228.46	31.65	J	chr11	13464702	13465375	LTR12_	LTR	ERV1
chr11	13646297	13647222	926	419	13646716	390	3100	252.25	S	N/A	N/A	N/A	N/A	N/A	N/A
chr11	14068861	14069143	283	94	14068955	11	114.13	38.31	J	chr11	14068946	14068970	(C)n	Simple_repeat	Simple_repeat
chr11	14647268	14647652	385	177	14647445	19	161.5	39.81	T	chr11	14647085	14647575	LTR33	LTR	ERVL
chr11	14869968	14870745	778	454	14870422	189	2130.34	167.41	U	N/A	N/A	N/A	N/A	N/A	N/A
chr11	14929327	14929607	281	112	14929439	16	127.63	22.33	D	N/A	N/A	N/A	N/A	N/A	N/A
chr11	15121924	15122405	482	209	15122133	60	699.31	105.39	J	N/A	N/A	N/A	N/A	N/A	N/A
chr11	15432498	15432919	422	149	15432647	23	176.08	38.05	D	chr11	15432285	15432704	MLT1L	LTR	MaLR
chr11	15795666	15796043	378	114	15795780	17	126.52	25.32	D	chr11	15795653	15795952	MLT1J2	LTR	MaLR
chr11	15905255	15905729	475	219	15905474	29	244.96	36.71	D	chr11	15905173	15905694	MLT1K	LTR	MaLR
chr11	16334333	16334733	401	274	16334607	19	142.95	32.93	R	N/A	N/A	N/A	N/A	N/A	N/A
chr11	16386977	16387336	360	114	16387091	37	408.8	81.15	D	N/A	N/A	N/A	N/A	N/A	N/A
chr11	17185870	17186378	509	252	17186122	43	338.09	47.45	B	N/A	N/A	N/A	N/A	N/A	N/A
chr11	17231470	17231684	215	108	17231578	19	274.77	72.78	D	chr11	17231526	17232060	LTR8	LTR	ERV1
chr11	17254235	17255370	1136	547	17254782	383	3100	212.03	V	N/A	N/A	N/A	N/A	N/A	N/A
chr11	17385605	17386115	511	296	17385901	67	668.47	89.41	J	chr11	17385743	17386296	MLT1K	LTR	MaLR
chr11	17476123	17476511	389	272	17476395	14	105.11	28.1	D	N/A	N/A	N/A	N/A	N/A	N/A
chr11	17681742	17682650	909	566	17682308	306	3100	370.57	J	chr11	17682177	17682383	MLT1J	LTR	MaLR
chr11	18024290	18024706	417	183	18024473	17	147.28	34.35	D	N/A	N/A	N/A	N/A	N/A	N/A
chr11	18253536	18253897	362	289	18253825	24	262.03	70.84	J	chr11	18253364	18254780	LTR12C	LTR	ERV1
chr11	18612181	18612786	606	418	18612599	77	499.65	35.93	B	N/A	N/A	N/A	N/A	N/A	N/A
chr11	18647902	18648279	378	137	18648039	23	161.37	20.87	D	N/A	N/A	N/A	N/A	N/A	N/A
chr11	18676611	18676988	378	221	18676832	34	306.33	40.57	T	N/A	N/A	N/A	N/A	N/A	N/A
chr11	19094862	19095478	617	383	19095245	105	1021.05	76.07	V	N/A	N/A	N/A	N/A	N/A	N/A
chr11	19218720	19219398	679	486	19219206	63	495.81	51.13	B	N/A	N/A	N/A	N/A	N/A	N/A
chr11	19219680	19220148	469	167	19219847	17	98.12	14.49	B	N/A	N/A	N/A	N/A	N/A	N/A
chr11	19385674	19386279	606	260	19385934	58	505.18	65.16	D	N/A	N/A	N/A	N/A	N/A	N/A
chr11	19437423	19437702	280	145	19437568	12	101.72	21.08	D	chr11	19437252	19437670	MLT1K	LTR	MaLR
chr11	19690366	19691226	861	540	19690906	228	2950.24	177.11	T	chr11	19690899	19690922	GC_rich	Low_complexity	Low_complexity
chr11	19692791	19693128	338	167	19692958	32	321.74	48.79	D	N/A	N/A	N/A	N/A	N/A	N/A
chr11	19734480	19734782	303	135	19734615	11	94.35	24.67	D	N/A	N/A	N/A	N/A	N/A	N/A
chr11	19884251	19884651	401	222	19884473	30	256.65	32.63	D	chr11	19884194	19884589	MLT1H	LTR	MaLR
chr11	20107042	20107429	388	164	20107206	19	180.99	44.93	D	chr11	20107170	20107278	MIRb	SINE	MIR
chr11	20338770	20339164	395	307	20339077	18	134.03	21.47	R	chr11	20338718	20339094	MLT1J	LTR	MaLR
chr11	21453434	21453782	349	159	21453593	15	141.67	45.97	D	chr11	21453583	21453774	MLT1I	LTR	MaLR
chr11	22603367	22604416	1050	636	22604003	514	3100	246.41	U	N/A	N/A	N/A	N/A	N/A	N/A
chr11	23180647	23181096	450	211	23180858	27	300.54	65.12	J	chr11	23180132	23181992	MER52A	LTR	ERV1
chr11	27450728	27451228	501	266	27450994	37	265.55	36.07	U	N/A	N/A	N/A	N/A	N/A	N/A
chr11	28086091	28086703	613	293	28086384	106	944.5	70.84	L	N/A	N/A	N/A	N/A	N/A	N/A
chr11	28265902	28266163	262	118	28266020	16	188.75	53.63	D	chr11	28265814	28266146	LTR53	LTR	ERVL
chr11	31127474	31127735	262	157	31127631	11	117.96	38.31	J	chr11	31127366	31128072	LTR12_	LTR	ERV1
chr11	31487262	31488356	1095	542	31487804	346	3100	245.49	K	N/A	N/A	N/A	N/A	N/A	N/A
chr11	31789085	31789786	702	423	31789508	128	1528.63	160.95	T	N/A	N/A	N/A	N/A	N/A	N/A
chr11	32003062	32003518	457	208	32003270	86	1326.57	279.63	D	chr11	32003258	32003389	MLT1L	LTR	MaLR
chr11	32065601	32066039	439	247	32065848	25	231.49	43.79	D	chr11	32065691	32065916	MLT1L	LTR	MaLR
chr11	32114642	32115310	669	319	32114961	88	1220.19	252.81	D	chr11	32114681	32115114	MLT1K	LTR	MaLR
chr11	32306634	32306964	331	224	32306858	15	142.15	38.94	D	chr11	32306604	32306937	MER101	LTR	ERV1
chr11	32561518	32562058	541	323	32561841	67	691.84	73.17	S	N/A	N/A	N/A	N/A	N/A	N/A
chr11	32865826	32866086	261	165	32865991	24	300.49	73.6	R	chr11	32865600	32866846	LTR12C	LTR	ERV1
chr11	32993764	32994283	520	179	32993943	116	1391.39	136.94	V	N/A	N/A	N/A	N/A	N/A	N/A
chr11	33139333	33140089	757	512	33139845	35	152.05	12.88	N	N/A	N/A	N/A	N/A	N/A	N/A
chr11	33380306	33380665	360	117	33380423	26	198.4	30.91	D	chr11	33380162	33380650	L2	LINE	L2
chr11	33613135	33613523	389	257	33613392	15	127.21	28	D	N/A	N/A	N/A	N/A	N/A	N/A
chr11	33855094	33855609	516	269	33855363	98	1109.27	101.91	R	N/A	N/A	N/A	N/A	N/A	N/A
chr11	33876858	33877392	535	312	33877170	22	91.34	16.74	T	chr11	33877082	33877359	L2	LINE	L2
chr11	33969188	33969385	198	100	33969288	10	136.74	38.31	J	chr11	33968039	33969698	LTR12C	LTR	ERV1
chr11	34027142	34027627	486	276	34027418	39	323.53	42.25	R	chr11	34027294	34027580	MLT1I	LTR	MaLR
chr11	34169597	34170148	552	298	34169895	55	526.37	62.21	D	N/A	N/A	N/A	N/A	N/A	N/A
chr11	34335637	34336658	1022	604	34336241	237	3205.02	306.99	T	N/A	N/A	N/A	N/A	N/A	N/A
chr11	34416480	34417502	1023	507	34416987	277	3100	239.43	S	N/A	N/A	N/A	N/A	N/A	N/A
chr11	34563910	34564256	347	181	34564091	25	178.21	22.08	T	N/A	N/A	N/A	N/A	N/A	N/A
chr11	34891710	34892238	529	310	34892020	78	907.11	94.59	R	chr11	34891405	34892028	LTR12_	LTR	ERV1
chr11	35022139	35022473	335	218	35022357	19	164.39	29.56	D	chr11	35022122	35022400	MER57A	LTR	ERV1
chr11	35060729	35061049	321	161	35060890	23	151.14	21.26	T	N/A	N/A	N/A	N/A	N/A	N/A
chr11	35132954	35133481	528	325	35133279	47	511.06	84.99	J	chr11	35132968	35133390	MLT1L	LTR	MaLR
chr11	35778380	35779062	683	378	35778758	30	226.53	34.5	J	N/A	N/A	N/A	N/A	N/A	N/A
chr11	35801935	35802464	530	311	35802246	42	360.85	51.52	J	chr11	35802184	35802282	MLT1L	LTR	MaLR
chr11	36312102	36312446	345	167	36312269	26	254.63	42.22	J	chr11	36312050	36312418	MLT1J	LTR	MaLR
chr11	37982303	37982588	286	157	37982460	13	140.29	38.31	D	chr11	37982375	37982969	LTR12_	LTR	ERV1
chr11	38256281	38256481	201	101	38256382	32	556.64	122.58	J	chr11	38255892	38257284	LTR12C	LTR	ERV1
chr11	38696247	38696596	350	224	38696471	44	615.67	130.24	J	chr11	38696225	38696610	MER57B	LTR	ERV1
chr11	39544652	39544961	310	117	39544769	10	97.13	34.47	J	chr11	39544331	39545415	LTR12	LTR	ERV1
chr11	42789725	42790082	358	105	42789830	14	95.78	23.92	D	N/A	N/A	N/A	N/A	N/A	N/A
chr11	43036590	43036834	245	111	43036701	12	134.56	41.67	D	N/A	N/A	N/A	N/A	N/A	N/A
chr11	43282681	43283034	354	173	43282854	18	112.11	19.54	D	N/A	N/A	N/A	N/A	N/A	N/A
chr11	43289908	43290200	293	179	43290087	18	133.16	20.04	S	N/A	N/A	N/A	N/A	N/A	N/A
chr11	43523542	43524153	612	375	43523917	118	1350.56	128.81	D	chr11	43523858	43524183	MLT1I	LTR	MaLR
chr11	43658371	43658945	575	255	43658626	90	1144.33	150.6	V	N/A	N/A	N/A	N/A	N/A	N/A
chr11	43746747	43747168	422	168	43746915	32	367.32	74.57	J	chr11	43746575	43747144	LTR12_	LTR	ERV1
chr11	43858535	43859270	736	368	43858903	206	2900.91	301.21	V	N/A	N/A	N/A	N/A	N/A	N/A
chr11	43954685	43954988	304	194	43954879	26	255.98	47.56	D	chr11	43954597	43954981	MLT1J1	LTR	MaLR
chr11	43985037	43985351	315	113	43985150	25	256.95	53.86	D	N/A	N/A	N/A	N/A	N/A	N/A
chr11	44351076	44351539	464	251	44351327	18	129.08	17.17	D	chr11	44351123	44351461	MLT1J	LTR	MaLR
chr11	44352050	44352589	540	270	44352320	23	136.06	25.76	D	chr11	44351942	44352519	MLT1K	LTR	MaLR
chr11	44378562	44379097	536	205	44378767	75	877.15	109.49	J	chr11	44378607	44378871	MLT1K	LTR	MaLR
chr11	44543215	44543811	597	264	44543479	30	190.47	26.96	T	N/A	N/A	N/A	N/A	N/A	N/A
chr11	44673202	44673785	584	240	44673442	152	1990.07	203.94	D	chr11	44673388	44673562	MLT1K	LTR	MaLR
chr11	44795419	44796071	653	317	44795736	53	515.92	92.65	D	chr11	44795725	44795815	MLT1H	LTR	MaLR
chr11	44800561	44800831	271	111	44800672	16	116.07	20.94	D	chr11	44800416	44800742	MLT1J1	LTR	MaLR
chr11	44839152	44839653	502	304	44839456	98	1367.58	201.84	D	chr11	44839177	44839490	MLT1K	LTR	MaLR
chr11	44840463	44840870	408	228	44840691	20	136.96	27.37	D	chr11	44840656	44840762	L2	LINE	L2
chr11	44877926	44878661	736	345	44878271	118	1355.41	132.49	J	N/A	N/A	N/A	N/A	N/A	N/A
chr11	45078490	45078872	383	206	45078696	32	376.61	92.09	D	N/A	N/A	N/A	N/A	N/A	N/A
chr11	45125012	45125850	839	374	45125386	140	1718.78	206.09	T	N/A	N/A	N/A	N/A	N/A	N/A
chr11	45231742	45232329	588	272	45232014	73	924.97	193.89	J	chr11	45231875	45232222	MLT1J2	LTR	MaLR
chr11	45311795	45312319	525	231	45312026	31	248.42	36.53	D	chr11	45311813	45312039	MLT1L	LTR	MaLR
chr11	45496106	45496526	421	285	45496391	35	387.8	83.01	J	N/A	N/A	N/A	N/A	N/A	N/A
chr11	45556198	45556972	775	435	45556633	365	3100	510.54	J	chr11	45556535	45556704	MLT1H	LTR	MaLR
chr11	45571953	45572593	641	326	45572279	220	3100	337.34	J	chr11	45572186	45572649	MLT1K	LTR	MaLR
chr11	45624452	45625395	944	483	45624935	261	3100	394	J	chr11	45624844	45625182	MLT1J	LTR	MaLR
chr11	45700158	45700750	593	264	45700422	69	846.36	152.23	J	N/A	N/A	N/A	N/A	N/A	N/A
chr11	45704767	45705211	445	329	45705096	32	336.58	40.07	D	N/A	N/A	N/A	N/A	N/A	N/A
chr11	45773428	45774193	766	352	45773780	117	1064.85	89.9	J	chr11	45773597	45773831	MLT1K	LTR	MaLR
chr11	45825126	45825797	672	318	45825444	57	361.07	32.44	S	N/A	N/A	N/A	N/A	N/A	N/A
chr11	45895905	45896547	643	338	45896243	40	189.4	21.61	U	N/A	N/A	N/A	N/A	N/A	N/A
chr11	45896591	45897173	583	385	45896976	100	936.32	65.95	U	N/A	N/A	N/A	N/A	N/A	N/A
chr11	45961036	45961618	583	245	45961281	41	275.82	33.12	V	N/A	N/A	N/A	N/A	N/A	N/A
chr11	46154763	46155191	429	270	46155033	22	128.65	19.63	D	chr11	46154864	46155277	LTR16A	LTR	ERVL
chr11	46227681	46228433	753	304	46227985	118	906.52	56.07	U	N/A	N/A	N/A	N/A	N/A	N/A
chr11	46250109	46250700	592	259	46250368	47	398.91	55.92	D	N/A	N/A	N/A	N/A	N/A	N/A
chr11	46273382	46274176	795	421	46273803	214	2276.88	124.21	V	N/A	N/A	N/A	N/A	N/A	N/A
chr11	46293100	46293609	510	250	46293350	121	1368.45	94.36	D	N/A	N/A	N/A	N/A	N/A	N/A
chr11	46369752	46370291	540	231	46369983	39	332.45	55.49	T	chr11	46369969	46370023	GC_rich	Low_complexity	Low_complexity
chr11	46370623	46371010	388	139	46370762	20	148.1	25.99	T	N/A	N/A	N/A	N/A	N/A	N/A
chr11	46492029	46492345	317	118	46492147	17	140.46	27.74	M	N/A	N/A	N/A	N/A	N/A	N/A
chr11	46620895	46621510	616	307	46621202	53	499.58	61.43	J	chr11	46621044	46621572	MER101B	LTR	ERV1
chr11	46653106	46653462	357	195	46653301	18	137.23	27.6	D	N/A	N/A	N/A	N/A	N/A	N/A
chr11	46823898	46824990	1093	565	46824463	364	3100	356.98	B	N/A	N/A	N/A	N/A	N/A	N/A
chr11	46843408	46843893	486	236	46843644	20	153.58	37.47	D	N/A	N/A	N/A	N/A	N/A	N/A
chr11	47154669	47155474	806	469	47155138	138	1440.35	89.49	B	N/A	N/A	N/A	N/A	N/A	N/A
chr11	47404371	47404950	580	284	47404655	59	444.31	44.01	B	N/A	N/A	N/A	N/A	N/A	N/A
chr11	47431452	47432056	605	344	47431796	37	346.51	57.83	J	chr11	47431553	47432031	LTR12B	LTR	ERV1
chr11	47745289	47746196	908	441	47745730	389	3100	355.14	B	N/A	N/A	N/A	N/A	N/A	N/A
chr11	47895889	47896432	544	278	47896167	69	539.02	34.57	T	N/A	N/A	N/A	N/A	N/A	N/A
chr11	47921752	47922479	728	447	47922199	47	257.69	24.77	R	N/A	N/A	N/A	N/A	N/A	N/A
chr11	47939521	47940013	493	116	47939637	41	429.16	68.58	J	N/A	N/A	N/A	N/A	N/A	N/A
chr11	47971628	47971977	350	128	47971756	19	121.56	15.46	E	N/A	N/A	N/A	N/A	N/A	N/A
chr11	48062508	48062892	385	212	48062720	39	345.35	36.84	J	chr11	48062594	48062974	MER101	LTR	ERV1
chr11	50214098	50214610	513	193	50214291	31	303.63	68.7	U	N/A	N/A	N/A	N/A	N/A	N/A
[truncated: 10,657 more rows]

## Sheet: K562_YA_peaks_Table.2
K562 NF-YA ChIP-Seq peaks (p-value <=1e-09)
chr	start	end	length	summit	summit coordinate	tags	-10*log10(pvalue)	fold enrichment
chr1	703828	704107	280	161	703989	28	312.97	49.72
chr1	925168	925719	552	272	925440	29	135.25	19.67
chr1	958211	958720	510	242	958453	31	203.36	29.26
chr1	1156978	1157579	602	387	1157365	85	533.94	29.1
chr1	1324562	1324995	434	106	1324668	55	573.03	61.67
chr1	1436996	1437475	480	315	1437311	65	444.95	34.29
chr1	1971419	1971739	321	196	1971615	14	94.78	17.24
chr1	2110813	2111304	492	264	2111077	29	93.41	11.16
chr1	2120559	2121083	525	253	2120812	41	124.62	11.41
chr1	2312619	2313245	627	296	2312915	78	476.39	27.42
chr1	3530967	3531660	694	352	3531319	70	498.47	42.19
chr1	3556292	3556841	550	270	3556562	84	608.26	43.61
chr1	3806398	3807388	991	222	3806620	47	115.96	7.01
chr1	3899282	3899844	563	209	3899491	28	144.46	16.47
chr1	5704491	5704855	365	161	5704652	30	206.98	25.64
chr1	5974751	5975745	995	482	5975233	297	2941.39	108.97
chr1	6016696	6017161	466	128	6016824	31	214.71	22.29
chr1	6242491	6242923	433	288	6242779	25	122.38	16.72
chr1	6562276	6562843	568	321	6562597	43	171.43	13.14
chr1	6767172	6768316	1145	633	6767805	422	3100	119.64
chr1	7319930	7320384	455	192	7320122	19	109.48	18.24
chr1	7687038	7687581	544	277	7687315	64	585.27	64.53
chr1	7766354	7767011	658	246	7766600	86	616.65	30.09
chr1	7936563	7937125	563	351	7936914	76	425.07	26.97
chr1	8008788	8009351	564	261	8009049	55	298.24	26.47
chr1	8136323	8136681	359	102	8136425	14	90.11	14.23
chr1	8799949	8800731	783	432	8800381	175	1323.82	59.63
chr1	8861145	8861738	594	291	8861436	139	1101.67	53.61
chr1	9411381	9412079	699	323	9411704	82	328.14	18.35
chr1	9521818	9522184	367	111	9521929	26	127.93	13.81
chr1	9832708	9833288	581	318	9833026	47	288.9	21.89
chr1	9892908	9893585	678	312	9893220	48	204.63	18.11
chr1	9925742	9926330	589	352	9926094	64	211.91	16.01
chr1	10192642	10193462	821	435	10193077	247	2031.58	54.58
chr1	10381213	10381994	782	377	10381590	218	1782.12	57.99
chr1	10454926	10455581	656	317	10455243	73	299.44	21.93
chr1	10855838	10856230	393	263	10856101	19	120.01	18.07
chr1	11042421	11043081	661	327	11042748	82	451.4	34.59
chr1	11244778	11245844	1067	633	11245411	306	2607.74	59.63
chr1	11301532	11302104	573	302	11301834	34	155.74	16.55
chr1	11348269	11348813	545	355	11348624	38	196.8	15.84
chr1	11780229	11780863	635	374	11780603	40	94.48	10.12
chr1	11788390	11789059	670	396	11788786	65	270.17	14.69
chr1	11890403	11891882	1480	1265	11891668	97	146.81	6.62
chr1	11931600	11932149	550	346	11931946	37	154.64	12.54
chr1	12001701	12002476	776	416	12002117	219	1831.84	53.52
chr1	12034573	12035175	603	286	12034859	36	90.17	10.56
chr1	12078442	12079141	700	322	12078764	105	828.62	41.36
chr1	12511882	12512415	534	309	12512191	31	132.8	14.61
chr1	12536596	12537073	478	181	12536777	44	224.92	15.32
chr1	12586912	12587447	536	230	12587142	30	107.38	12.41
chr1	13948070	13948740	671	397	13948467	98	843.77	66.45
chr1	14618821	14619346	526	240	14619061	25	127.15	18.97
chr1	14760460	14760684	225	115	14760575	15	106.98	17.55
chr1	14984199	14984671	473	218	14984417	38	175.53	13.84
chr1	15076190	15076807	618	341	15076531	37	123.79	11.15
chr1	15096043	15096675	633	351	15096394	59	362.49	25.58
chr1	15169220	15169628	409	198	15169418	48	336.98	33.33
chr1	15435414	15435689	276	141	15435555	15	95.82	15.43
chr1	15478661	15478985	325	214	15478875	20	101.88	12.32
chr1	15539308	15539976	669	353	15539661	88	616.67	39.95
chr1	15656734	15657142	409	201	15656935	15	101.54	20.9
chr1	15802484	15803008	525	296	15802780	31	132.54	16.72
chr1	16030997	16031388	392	241	16031238	24	134.61	19.85
chr1	16033096	16033864	769	372	16033468	86	406.11	26.25
chr1	16629545	16630191	647	356	16629901	58	250.95	17.65
chr1	17103644	17104235	592	291	17103935	38	146.31	14.71
chr1	17318286	17318988	703	316	17318602	90	571.17	45.28
chr1	18651600	18652045	446	213	18651813	37	202.64	21.5
chr1	18902467	18902876	410	211	18902678	29	136.57	13.53
chr1	19035634	19036219	586	306	19035940	63	518.39	56.59
chr1	19101518	19102360	843	448	19101966	120	835.1	37.09
chr1	19190565	19191157	593	309	19190874	28	159.05	15.58
chr1	19261795	19262213	419	131	19261926	22	145.19	29.14
chr1	19852846	19853338	493	235	19853081	29	128.34	15.66
chr1	19858701	19859134	434	334	19859035	32	97.79	9.07
chr1	19914552	19915065	514	233	19914785	31	134.96	13.53
chr1	20639872	20640266	395	158	20640030	38	164.23	14.73
chr1	20802466	20802909	444	196	20802662	28	111.35	13.08
chr1	20860211	20861239	1029	430	20860641	286	2290.52	61.3
chr1	20865941	20866219	279	123	20866064	24	192.96	29.66
chr1	20985404	20986176	773	425	20985829	70	184.2	11.13
chr1	21544367	21545062	696	302	21544669	53	250.28	19.23
chr1	22247408	22248166	759	450	22247858	70	196.87	10.54
chr1	22274779	22275137	359	257	22275036	17	91.88	10.75
chr1	22583022	22583494	473	263	22583285	33	166.79	13.37
chr1	22627703	22628275	573	214	22627917	86	683.08	51.04
chr1	22650731	22651136	406	120	22650851	45	305.44	28
chr1	22861329	22861941	613	396	22861725	80	668.87	55.73
chr1	22979681	22980102	422	246	22979927	27	122.63	17.55
chr1	23134517	23134869	353	223	23134740	17	103.52	19.5
chr1	23400089	23400404	316	109	23400198	17	111.21	18.11
chr1	23543180	23544192	1013	326	23543506	225	1511.49	54.93
chr1	23566995	23568247	1253	502	23567497	211	1049.32	32.66
chr1	23720501	23721123	623	328	23720829	47	218.89	23.56
chr1	23761301	23761898	598	268	23761569	40	183.33	17.35
chr1	23815536	23815950	415	176	23815712	35	207.24	18.29
chr1	24453664	24454338	675	412	24454076	82	599.7	47.37
chr1	24612539	24613289	751	367	24612906	180	1676.93	84.39
chr1	24614017	24615659	1643	776	24614793	313	1925.74	62.57
chr1	24689350	24689883	534	404	24689754	38	255.56	24.23
chr1	24841791	24842493	703	317	24842108	53	145.15	11
chr1	24904132	24904729	598	374	24904506	95	624.99	29.85
chr1	24921141	24921500	360	177	24921318	17	120.74	18.17
chr1	24923401	24924026	626	381	24923782	37	142.99	14.54
chr1	25187085	25187613	529	246	25187331	27	147.23	19.67
chr1	25432048	25432635	588	328	25432376	50	338.69	26.75
chr1	25629013	25630306	1294	829	25629842	367	3008.33	73.67
chr1	25914945	25915511	567	265	25915210	47	252.33	27.86
chr1	26105318	26105846	529	275	26105593	27	91.97	12.04
chr1	26234243	26234908	666	296	26234539	57	201.58	14.33
chr1	26269306	26269959	654	288	26269594	48	121.11	6.88
chr1	26325353	26325980	628	280	26325633	99	684.72	28.87
chr1	26432756	26433655	900	403	26433159	169	921.81	29.55
chr1	26505437	26506077	641	316	26505753	115	694.57	39.14
chr1	26671206	26671743	538	315	26671521	34	121.38	14.24
chr1	26897063	26897768	706	278	26897341	55	167.78	11.35
chr1	27063932	27064716	785	333	27064265	167	1187.55	48.07
chr1	27120267	27120982	716	415	27120682	154	1066.22	44.75
chr1	27211622	27212463	842	507	27212129	181	1377.37	40.47
chr1	27433164	27433710	547	335	27433499	118	852.55	35
chr1	27591350	27591934	585	286	27591636	39	96.2	10.29
chr1	27688961	27689877	917	380	27689341	169	742.11	27.76
chr1	27799412	27800000	589	289	27799701	41	174.71	22.29
chr1	27871142	27871658	517	168	27871310	51	213.27	14.26
chr1	27924413	27925314	902	537	27924950	168	1171.23	47.85
chr1	28113427	28114537	1111	522	28113949	323	2725.72	44.22
chr1	28371688	28372170	483	246	28371934	27	95.71	12.79
chr1	28434713	28435641	929	430	28435143	276	2070.22	49.32
chr1	28446025	28446893	869	430	28446455	177	1432.71	62
chr1	28458098	28458770	673	411	28458509	89	413	20.77
chr1	28868838	28869261	424	297	28869135	31	132.8	15.47
chr1	29082813	29083312	500	290	29083103	46	187.34	13.68
chr1	29085574	29086485	912	578	29086152	111	479.1	27.01
chr1	29113225	29113724	500	300	29113525	65	365.17	23.41
chr1	29548865	29549764	900	468	29549333	123	687.42	32.88
chr1	29712363	29712881	519	279	29712642	50	409.88	44.58
chr1	29740039	29740459	421	174	29740213	18	101.25	14.17
chr1	29894966	29895500	535	299	29895265	27	142.99	19.11
chr1	29984605	29985024	420	207	29984812	19	119.91	22.51
chr1	30109969	30110423	455	279	30110248	19	116.76	21.73
chr1	30363118	30363663	546	240	30363358	45	249.89	23.41
chr1	31003815	31004764	950	583	31004398	123	595.32	21.14
chr1	31014185	31014998	814	461	31014646	64	167.11	8.36
chr1	31023554	31024476	923	463	31024017	192	980.1	34.08
chr1	31069403	31070339	937	656	31070059	123	596.87	28.66
chr1	31099415	31100060	646	338	31099753	96	515.96	31.93
chr1	31541951	31542653	703	362	31542313	185	1363.34	42.47
chr1	31882567	31883657	1091	568	31883135	136	391.95	19.02
chr1	31981160	31981530	371	174	31981334	22	111.91	14.86
chr1	32176360	32176946	587	271	32176631	40	115.07	11.46
chr1	32417376	32418150	775	519	32417895	58	172.05	12.42
chr1	32529669	32530550	882	509	32530178	148	787.13	32.6
chr1	32632516	32633118	603	221	32632737	55	152.12	8.54
chr1	32888990	32889905	916	322	32889312	109	596.68	37.77
chr1	33274346	33275777	1432	817	33275163	395	3100	126.09
chr1	33318930	33319494	565	310	33319240	46	164.19	13.92
chr1	33365326	33365960	635	326	33365652	57	254.63	19.46
chr1	33476582	33476887	306	112	33476694	37	268.55	23.87
chr1	33489921	33490351	431	192	33490113	19	107	19.5
chr1	33540669	33540932	264	110	33540779	14	98.87	16.72
chr1	33669142	33669606	465	196	33669338	35	190.52	23.32
chr1	33710121	33710974	854	531	33710652	234	1930.01	63.15
chr1	35097729	35098356	628	319	35098048	53	258.8	22.29
chr1	35431040	35431980	941	425	35431465	263	1956.3	52.44
chr1	35795308	35796324	1017	587	35795895	335	2457.91	59.97
chr1	36008052	36008611	560	234	36008286	55	216.41	14.86
chr1	36545014	36545506	493	206	36545220	42	208.05	15.11
chr1	36623904	36625172	1269	433	36624337	317	2029.67	46.22
chr1	36635934	36636429	496	250	36636184	55	324.05	29.71
chr1	37513414	37513943	530	279	37513693	37	247.73	38.58
chr1	37661893	37662776	884	306	37662199	95	689.39	52.25
chr1	37928446	37929355	910	503	37928949	254	1923.22	64.61
chr1	37930264	37931057	794	424	37930688	126	725.03	30.48
chr1	38097552	38098291	740	371	38097923	85	346.87	19.2
chr1	38160984	38161542	559	250	38161234	33	111.12	8.1
chr1	38169763	38170654	892	404	38170167	171	1083.39	41.56
chr1	38250535	38251336	802	387	38250922	116	422.96	15.85
chr1	38285015	38285535	521	244	38285259	20	92.25	14.93
chr1	39097891	39098484	594	186	39098077	94	656.06	41.71
chr1	39396837	39397362	526	224	39397061	34	94.05	9.55
chr1	39840071	39840350	280	111	39840182	17	161.75	37.29
chr1	39901825	39902235	411	165	39901990	19	94.91	16.94
chr1	39915973	39916342	370	189	39916162	21	99.99	12.37
chr1	40136741	40137829	1089	652	40137393	238	1678.61	48.13
chr1	40929660	40930700	1041	731	40930391	73	205.46	14.26
chr1	40946746	40948004	1259	780	40947526	381	3175.29	72.95
chr1	41100483	41100967	485	212	41100695	38	135.8	11.15
chr1	41217645	41218538	894	581	41218226	149	1029.44	54.01
chr1	41571561	41572045	485	249	41571810	27	136.12	18.24
chr1	41599179	41599660	482	229	41599408	34	125.81	12.09
chr1	42401385	42401740	356	170	42401555	21	138.34	20.22
chr1	42920107	42920785	679	496	42920603	230	2051.62	62.95
chr1	43063295	43063917	623	388	43063683	48	141.58	7.04
chr1	43084288	43085209	922	448	43084736	337	3100	123.57
chr1	43162185	43163006	822	477	43162662	110	528.49	23.04
chr1	43596829	43597455	627	327	43597156	126	1200.08	86.54
chr1	43627736	43628445	710	383	43628119	84	370.21	25.54
chr1	43887791	43888955	1165	456	43888247	316	2338.5	46.09
chr1	43945087	43946095	1009	642	43945729	161	871.44	37.05
chr1	44207775	44208605	831	384	44208159	238	1907.28	54.08
chr1	44593322	44594104	783	259	44593581	220	1844.21	62.18
chr1	44912218	44913304	1087	688	44912906	278	1787.3	49.04
chr1	44968951	44969746	796	180	44969131	42	105.87	7.52
chr1	45273860	45274336	477	241	45274101	26	106.2	12.76
chr1	45729280	45729951	672	252	45729532	70	249.16	14.44
chr1	45821469	45822491	1023	312	45821781	153	679.71	24.17
chr1	46303633	46304019	387	186	46303819	21	99.99	12.94
chr1	46370346	46372022	1677	993	46371339	165	770.59	35.29
chr1	46386557	46386959	403	189	46386746	33	137.36	12.91
chr1	46485615	46486293	679	329	46485944	186	1574.19	70.38
chr1	46608533	46608837	305	194	46608727	20	92.25	13.84
chr1	46727689	46728358	670	334	46728023	62	311.66	25.41
chr1	46957036	46957758	723	390	46957426	103	593.99	40.12
chr1	47552046	47552965	920	528	47552574	243	2003.72	55.83
chr1	51198291	51198838	548	295	51198586	40	136.51	12.02
chr1	51756172	51756667	496	286	51756458	41	117.97	9.48
chr1	51855204	51856111	908	460	51855664	131	600.44	22.69
chr1	51886509	51887014	506	300	51886809	32	90.65	7.31
chr1	51967535	51968321	787	463	51967998	127	784.89	43.68
chr1	52116838	52117794	957	288	52117126	120	562.17	31.53
chr1	52810013	52810497	485	164	52810177	39	274.12	29.29
chr1	52941079	52941912	834	230	52941309	161	1075.62	40.28
chr1	53564327	53565091	765	310	53564637	91	472.27	27.31
chr1	53977183	53978141	959	372	53977555	113	934.71	81.06
chr1	54437948	54438794	847	420	54438368	240	1887.5	59.71
chr1	54644558	54645028	471	192	54644750	60	416.39	37.06
chr1	54645565	54646369	805	356	54645921	90	426.64	24.81
chr1	54726515	54726903	389	199	54726714	27	112.31	13.5
chr1	54752357	54752802	446	284	54752641	64	622.68	60.79
chr1	55002590	55003369	780	409	55002999	128	584.89	25.08
chr1	55013348	55013912	565	257	55013605	80	435.99	26.85
chr1	55125223	55125938	716	365	55125588	83	457.84	27.24
chr1	57311099	57311402	304	152	57311251	25	228.16	40.42
chr1	59022077	59022706	630	347	59022424	53	246.89	20.41
chr1	59299988	59300574	587	269	59300257	26	112.21	12.54
chr1	59745338	59745740	403	112	59745450	17	107.49	16.84
chr1	61125250	61125754	505	284	61125534	23	93.41	13
chr1	61315107	61316694	1588	1244	61316351	205	1382.41	64.11
chr1	61422091	61422864	774	441	61422532	59	250.95	18.39
chr1	62674474	62675363	890	257	62674731	141	1078.49	45.38
chr1	64441601	64442044	444	192	64441793	25	178.46	26.75
chr1	65453828	65454318	491	271	65454099	39	295.99	34
chr1	65569164	65569502	339	106	65569270	17	102.41	18.43
chr1	67162866	67163763	898	267	67163133	94	505.01	36.17
chr1	67827851	67828179	329	219	67828070	19	96.88	13.93
chr1	67923192	67923693	502	252	67923444	33	130.08	15.14
chr1	68735254	68735715	462	145	68735399	31	165.67	18.58
chr1	70598553	70599129	577	280	70598833	44	256.02	32.8
chr1	70648858	70649710	853	574	70649432	121	527.8	25.46
chr1	78242321	78243375	1055	369	78242690	65	273.58	17.55
chr1	84928596	84929311	716	295	84928891	82	499.97	30.53
chr1	85300152	85300874	723	384	85300536	94	901.68	85.11
chr1	85439162	85439546	385	152	85439314	30	166.05	19.23
chr1	85514638	85515265	628	274	85514912	37	104.58	9.17
chr1	85542079	85542446	368	141	85542220	15	96.14	18.96
chr1	87152346	87153056	711	345	87152691	106	733.24	39.71
chr1	87525347	87525739	393	120	87525467	30	218.14	26.28
chr1	87566422	87566983	562	250	87566672	111	1000.69	73.03
chr1	89231064	89231638	575	284	89231348	53	246.89	15.62
chr1	89762820	89763187	368	156	89762976	24	96.06	13.5
chr1	90058744	90059270	527	327	90059071	37	129.18	14.32
chr1	90232911	90233485	575	315	90233226	35	179.35	13.77
chr1	90956008	90956462	455	228	90956236	21	129.2	17.03
chr1	91049762	91050088	327	184	91049946	15	99.14	16.08
chr1	91374025	91374386	362	159	91374184	17	142.88	27.35
chr1	92782752	92783276	525	293	92783045	24	112.02	12.07
chr1	93042869	93043142	274	175	93043044	14	91.61	16.72
chr1	94915961	94916232	272	108	94916069	13	104.97	22.99
chr1	100487695	100488362	668	274	100487969	52	171.2	12.14
chr1	102898824	102899101	278	153	102898977	12	98.52	18.59
chr1	109036095	109036718	624	295	109036390	50	157.89	11.3
chr1	109585529	109585936	408	161	109585690	22	92.74	10.55
chr1	109741877	109742800	924	338	109742215	191	1523.69	65.54
chr1	109770037	109771195	1159	622	109770659	273	1849.63	61.15
chr1	110014407	110014664	258	105	110014512	13	106.55	20.39
chr1	110672327	110672742	416	278	110672605	29	207.48	25.04
chr1	110682405	110684080	1676	913	110683318	650	3100	50.16
chr1	110751605	110752151	547	237	110751842	32	95.08	7.8
chr1	111307839	111308810	972	498	111308337	189	1144.49	36.52
chr1	112083324	112083957	634	336	112083660	60	393.75	28.99
chr1	112739951	112740782	832	332	112740283	103	679.29	41.73
chr1	113301503	113301990	488	269	113301772	54	280.11	23.06
chr1	113417031	113417627	597	247	113417278	52	144.2	11.52
chr1	113734059	113734895	837	431	113734490	147	1146.43	61.2
chr1	114156225	114156888	664	404	114156629	39	106.99	9.44
chr1	114248940	114249549	610	344	114249284	57	187.71	12.23
chr1	114724081	114724649	569	263	114724344	33	137.36	11.89
chr1	114869050	114869567	518	300	114869350	25	158.74	25.72
chr1	116759793	116760351	559	211	116760004	55	216.76	15.33
chr1	117005773	117006233	461	237	117006010	21	112.51	14.13
chr1	117075499	117075956	458	238	117075737	32	151.74	13.78
chr1	117171220	117171848	629	388	117171608	54	228.77	16.72
chr1	117403928	117404855	928	370	117404298	185	1220.12	48.19
chr1	117465660	117466676	1017	343	117466003	213	1655.51	37.78
chr1	117949696	117950335	640	317	117950013	36	117.8	8.36
chr1	118273474	118274074	601	334	118273808	78	334.79	15.13
chr1	119484430	119485092	663	433	119484863	40	119.42	9.92
chr1	120639748	120640361	614	504	120640252	29	219.11	32.32
chr1	121185571	121187037	1467	1167	121186738	663	230.73	2.84
chr1	143244830	143245827	998	648	143245478	93	206.52	8.96
chr1	144124069	144124549	481	304	144124373	33	178.07	21.36
chr1	144149327	144150079	753	413	144149740	164	1094.12	47.37
chr1	144166529	144167155	627	273	144166802	64	335.47	22.51
chr1	144181466	144182078	613	298	144181764	58	274.9	24.11
chr1	144187980	144188555	576	340	144188320	50	197.24	13.06
chr1	144218457	144219077	621	440	144218897	62	362.12	31.05
chr1	145456266	145456785	520	350	145456616	33	278.5	34.83
chr1	147491093	147491455	363	107	147491200	17	92.23	15.78
chr1	148124691	148125223	533	268	148124959	158	1648.27	80.25
chr1	148125918	148126669	752	318	148126236	107	655.67	26.34
chr1	148474834	148475728	895	418	148475252	279	2555.77	91.95
chr1	148507931	148508331	401	209	148508140	26	127.68	13.37
chr1	148602865	148603419	555	275	148603140	33	103.17	10.95
chr1	148726035	148726923	889	387	148726422	217	2224.53	89.49
chr1	148754395	148755012	618	332	148754727	75	354.61	19.58
chr1	148867750	148869205	1456	588	148868338	528	3100	107.97
chr1	148935869	148937012	1144	631	148936500	332	2786.04	65.8
chr1	149115664	149116182	519	287	149115951	26	106.2	13.88
chr1	149385622	149386186	565	276	149385898	32	111.47	15.38
chr1	149493429	149494165	737	364	149493793	151	1017.97	43.37
chr1	149520330	149521816	1487	909	149521239	417	3212.09	64.26
chr1	149585995	149586813	819	462	149586457	107	783.78	48.4
chr1	149698484	149699104	621	151	149698635	65	440.75	36.22
chr1	150029252	150030351	1100	494	150029746	380	3100	100.31
chr1	150144136	150144412	277	189	150144325	13	101.22	23.88
chr1	150286987	150287534	548	248	150287235	54	210.77	13.28
chr1	151909756	151910637	882	416	151910172	228	2102.47	90.13
chr1	151966570	151967356	787	409	151966979	170	1171.38	39.96
chr1	152161844	152162873	1030	375	152162219	277	2498.18	76.91
chr1	152197702	152197977	276	129	152197831	23	94.24	9.74
chr1	152202321	152203247	927	421	152202742	124	618.94	32.48
chr1	152206233	152207360	1128	659	152206892	273	2237.37	75.43
chr1	152398651	152399093	443	216	152398867	20	94.21	14.11
chr1	152422296	152422673	378	133	152422429	29	148.61	15.2
chr1	153195034	153195666	633	222	153195256	87	563.26	28.76
chr1	153213142	153214273	1132	520	153213662	315	2990.94	94.5
chr1	153221820	153222767	948	539	153222359	341	3100	107.81
chr1	153240996	153241592	597	312	153241308	103	818.21	61.15
chr1	153250982	153251637	656	315	153251297	41	131.72	12.7
chr1	153463726	153464366	641	328	153464054	114	953.34	58.51
chr1	153480828	153481508	681	367	153481195	54	297.77	21.89
chr1	153544730	153545524	795	438	153545168	183	1456.62	50.16
chr1	153846225	153846678	454	341	153846566	44	421.51	51.23
chr1	153981918	153982252	335	224	153982142	21	197.83	34.8
chr1	154170639	154171285	647	321	154170960	63	371.18	32.64
chr1	154397286	154397608	323	214	154397500	21	115.11	13.93
chr1	154430084	154430769	686	286	154430370	65	341.82	21.59
chr1	154448955	154449877	923	421	154449376	201	1237.04	44.96
chr1	154519073	154519566	494	222	154519295	26	107.35	11.7
chr1	154574439	154575231	793	352	154574791	227	1609.52	40.16
chr1	154736760	154737575	816	507	154737267	65	323.29	24.68
chr1	154741455	154742075	621	433	154741888	71	403.61	33.74
chr1	154988011	154988560	550	285	154988296	46	234.4	24.93
chr1	158016928	158017593	666	351	158017279	63	290.31	19.92
chr1	158268143	158268686	544	247	158268390	28	144.46	17.05
chr1	158521491	158521888	398	126	158521617	26	212.31	35.29
chr1	158776473	158776982	510	328	158776801	48	193.52	16.23
chr1	159257127	159258169	1043	721	159257848	197	1500.69	37.56
chr1	159402351	159403204	854	429	159402780	133	647.25	27.86
chr1	159461866	159462667	802	381	159462247	179	1457	66.87
chr1	160797572	160798114	543	259	160797831	34	117.56	7.87
chr1	161558007	161558612	606	347	161558354	35	90.33	7.6
chr1	162794491	162794930	440	339	162794830	28	163.8	17.91
chr1	163833790	163834555	766	371	163834161	91	416.61	25.14
chr1	164726123	164726587	465	211	164726334	21	95.13	12.54
chr1	164941237	164941751	515	242	164941479	33	137.36	13.63
chr1	165789490	165790326	837	235	165789725	60	221.66	17.34
chr1	165957275	165958729	1455	510	165957785	241	1714.95	70.89
chr1	166171914	166172214	301	115	166172029	27	95.39	10.03
chr1	167603407	167604022	616	300	167603707	40	114.63	13.58
chr1	167721540	167722249	710	358	167721898	107	566.97	30.13
chr1	168129556	168130383	828	534	168130090	79	426.26	22.53
chr1	168312866	168313235	370	146	168313012	22	150.79	21.62
chr1	168767458	168768141	684	390	168767848	33	109.6	11.15
chr1	170016674	170017965	1292	688	170017362	236	1319.12	40.96
chr1	170767736	170769091	1356	518	170768254	202	975.6	36.36
chr1	171712658	171712934	277	172	171712830	23	107	12.54
chr1	171789826	171790365	540	207	171790033	28	94.74	9.06
chr1	171838551	171839088	538	389	171838940	34	188.26	22.49
chr1	172060114	172060922	809	228	172060342	68	213.69	14.46
chr1	172593967	172594382	416	150	172594117	23	120.51	16.72
chr1	173258921	173259612	692	266	173259187	43	111.04	8.68
chr1	175089169	175089558	390	282	175089451	26	121.91	14.57
chr1	177261378	177261702	325	224	177261602	22	114.21	11.7
chr1	177282694	177283230	537	268	177282962	65	382.67	24.37
chr1	177317408	177318048	641	293	177317701	51	185.05	16.72
chr1	178189880	178190584	705	392	178190272	57	187.78	10.84
chr1	178449031	178449713	683	344	178449375	70	387.78	29.95
chr1	178845301	178845943	643	323	178845624	54	199.4	17.23
chr1	179258584	179258821	238	112	179258696	19	107.46	13.93
chr1	179269329	179270013	685	374	179269703	128	808.15	43.76
chr1	179306323	179306873	551	258	179306581	46	294.08	26.61
chr1	179323883	179324717	835	504	179324387	84	328.59	18.58
chr1	180265236	180265816	581	329	180265565	30	125.02	15.84
chr1	180627250	180627951	702	371	180627621	85	502.97	32.25
chr1	181707375	181707997	623	324	181707699	50	138.17	7.61
chr1	182990344	182991201	858	402	182990746	227	1636.64	55.87
chr1	183392616	183393102	487	158	183392774	43	184.73	15.05
chr1	183520214	183520742	529	256	183520470	28	120.29	11.44
chr1	183551655	183552359	705	384	183552039	66	238.66	16.27
chr1	184610007	184610416	410	197	184610204	43	191.5	17.14
chr1	191131464	191131802	339	253	191131717	13	93.43	16.93
chr1	194387940	194388227	288	132	194388072	14	112.65	22.99
chr1	195381960	195383084	1125	514	195382474	213	1586.31	61.73
chr1	196393109	196394079	971	305	196393414	119	754.83	37.63
chr1	196394400	196395227	828	504	196394904	109	761.53	54.66
chr1	198855840	198856924	1085	713	198856553	121	502.49	26.47
chr1	199255068	199255575	508	284	199255352	28	101.97	11.29
chr1	199389887	199390654	768	368	199390255	104	697.5	42.16
chr1	200182053	200182532	480	298	200182351	53	274.83	19.6
chr1	200190900	200191552	653	281	200191181	150	1173.56	49.41
chr1	200577316	200578262	947	476	200577792	195	1223.99	37.84
chr1	200584019	200584608	590	240	200584259	34	98.44	9.47
chr1	201097171	201098009	839	284	201097455	181	1152.47	35.58
chr1	201242671	201243221	551	381	201243052	136	884.56	38.77
chr1	201562829	201563777	949	379	201563208	79	312.75	24.48
chr1	202647533	202648017	485	200	202647733	39	170.8	16.1
chr1	203463125	203463859	735	482	203463607	98	695.79	48.69
chr1	203557303	203557877	575	264	203557567	53	273.67	22.66
chr1	203985638	203986663	1026	384	203986022	174	1373.52	50.95
chr1	204048695	204049415	721	296	204048991	95	597.2	39.46
chr1	204085802	204086183	382	181	204085983	27	171.64	23.41
chr1	204802828	204803455	628	295	204803123	107	636.14	34.84
chr1	205292792	205293364	573	122	205292914	38	108.14	7.6
chr1	205759685	205760014	330	189	205759874	40	418.1	64.37
chr1	205884820	205885234	415	202	205885022	39	224.52	20.52
chr1	205931792	205932299	508	263	205932055	19	126.75	23.36
chr1	205991657	205992090	434	293	205991950	30	107.38	10.05
chr1	206062364	206063073	710	422	206062786	186	1501.05	62.56
chr1	209818928	209819590	663	344	209819272	82	522.08	36.03
chr1	209846296	209846834	539	304	209846600	34	116.84	12.54
chr1	209915348	209915893	546	311	209915659	71	426.35	28.48
chr1	210275168	210276071	904	537	210275705	96	382.14	21.24
chr1	210524392	210525567	1176	765	210525157	300	2117.45	45
chr1	211097896	211098411	516	263	211098159	50	235.55	21.33
chr1	211364466	211364979	514	270	211364736	30	144.8	15.79
chr1	211500678	211501035	358	162	211500840	20	92.25	11.12
chr1	211775612	211776040	429	191	211775803	19	112.59	16.42
chr1	211924499	211924861	363	104	211924603	19	109.56	12.14
chr1	212842664	212843700	1037	457	212843121	173	1491.62	76.71
chr1	217467982	217468450	469	178	217468160	21	129.02	20.7
chr1	218715053	218715331	279	184	218715237	14	116.09	25.72
chr1	219981829	219982634	806	325	219982154	198	1685.3	55.83
chr1	220857409	220857862	454	270	220857679	30	152.83	16.72
chr1	222246802	222247176	375	206	222247008	14	107.24	24.86
chr1	223682115	223682883	769	391	223682506	73	349.45	23.53
chr1	224031627	224032693	1067	461	224032088	177	991.67	50.62
chr1	224178271	224179041	771	393	224178664	127	904.1	42.8
chr1	224256955	224257685	731	288	224257243	63	120.37	7.49
chr1	224575196	224575643	448	288	224575484	25	181.75	26.12
chr1	224808187	224808561	375	249	224808436	19	126.5	25
chr1	225193973	225195087	1115	509	225194482	280	2212.04	75.23
chr1	225514710	225515084	375	107	225514817	25	119.89	12.54
chr1	225578204	225578605	402	188	225578392	24	99.06	10.9
chr1	225817416	225818318	903	405	225817821	168	1026.35	37.62
chr1	226111617	226112002	386	169	226111786	32	229.64	29.85
chr1	226143120	226143681	562	282	226143402	50	247.44	26.75
chr1	226394129	226394757	629	282	226394411	54	228.77	14.41
chr1	226419893	226420687	795	516	226420409	47	119.14	8.36
chr1	226660994	226661537	544	203	226661197	42	194.69	17.42
chr1	226688921	226689365	445	321	226689242	29	135.7	14.33
chr1	226711961	226712566	606	403	226712364	251	2803.69	83.22
chr1	226756779	226757320	542	263	226757042	42	219.63	23.54
chr1	227405679	227406324	646	343	227406022	87	761.55	76.43
chr1	227828394	227828824	431	142	227828536	33	173.12	20.82
chr1	228269075	228269645	571	342	228269417	26	90.88	7.84
chr1	231815681	231816194	514	219	231815900	24	99	15.79
chr1	231926731	231927114	384	111	231926842	18	106.66	16.72
chr1	233177309	233178124	816	507	233177816	115	386.89	13.55
chr1	233557909	233558781	873	361	233558270	161	1179.22	60.92
chr1	233597067	233597547	481	286	233597353	41	117.97	9.57
chr1	234096872	234097479	608	135	234097007	66	357.91	22.24
chr1	234579426	234579700	275	104	234579530	19	138.04	22.56
chr1	235024573	235025634	1062	556	235025129	212	1385.49	42.78
chr1	239749467	239750146	680	282	239749749	114	971.92	71.05
chr1	242277978	242278713	736	339	242278317	135	1088.74	50.16
chr1	242503051	242503450	400	107	242503158	21	102.32	14.75
chr1	244218159	244219034	876	482	244218641	193	1434.87	52.38
chr1	244795942	244796531	590	295	244796237	44	115.42	9.79
chr1	244929028	244929462	435	229	244929257	29	107.5	12.54
chr1	245237651	245238459	809	450	245238101	199	1762.28	77.32
chr1	245308418	245309076	659	372	245308790	41	204.82	22.03
chr1	245334017	245334598	582	395	245334412	74	382.64	20.48
chr1	245440473	245441172	700	380	245440853	104	754.85	48.64
chr1	246921320	246921838	519	282	246921602	50	447.9	55.17
chr1	247098607	247099356	750	347	247098954	111	728.03	32.79
chr1	247099450	247100048	599	414	247099864	59	278.33	17.87
chr10	967491	968102	612	284	967775	47	266.79	25.11
chr10	1023988	1024600	613	310	1024298	81	407.42	24.84
chr10	1084620	1085607	988	716	1085336	194	1715.61	56.51
chr10	1092092	1092411	320	160	1092252	19	112.67	16.72
chr10	3021671	3022097	427	238	3021909	18	118.34	18.17
chr10	3204755	3205330	576	293	3205048	58	386.51	43.65
chr10	3817288	3817990	703	362	3817650	140	1125.43	67.57
chr10	4857797	4858664	868	540	4858337	176	1484.39	65.35
chr10	4881713	4882274	562	203	4881916	32	107.7	9
chr10	5035952	5036162	211	106	5036058	14	138.6	34.8
chr10	5338795	5339141	347	158	5338953	17	123.36	23.62
chr10	5444225	5444777	553	247	5444472	46	224.47	18.11
chr10	5895223	5895778	556	313	5895536	49	316.42	31.35
chr10	5911106	5911660	555	327	5911433	40	248.4	28.98
chr10	5971757	5972320	564	354	5972111	174	1911.04	87.27
chr10	7342421	7342818	398	198	7342619	16	90.63	14.8
chr10	8071022	8071405	384	194	8071216	21	127.73	15.41
chr10	9957270	9957722	453	258	9957528	28	159.05	19.47
chr10	11260531	11260983	453	224	11260755	34	181.76	15.15
chr10	11683646	11683934	289	190	11683836	18	113.08	16.03
chr10	12150550	12151257	708	365	12150915	61	262.82	20.12
chr10	12347798	12348132	335	244	12348042	18	110.77	15.43
chr10	13243147	13243750	604	339	13243486	104	738.79	37.87
chr10	14919798	14920603	806	283	14920081	75	314.67	16.72
chr10	15035578	15036596	1019	540	15036118	125	784.83	43.61
chr10	15170560	15171099	540	302	15170862	45	358.38	43.64
chr10	17536925	17537507	583	446	17537371	97	616.29	30.74
chr10	22559331	22559832	502	255	22559586	32	145.39	16.72
chr10	25053317	25054056	740	321	25053638	63	296.58	18.06
chr10	25503438	25503890	453	159	25503597	40	365.92	46.44
chr10	25794670	25795018	349	210	25794880	19	151.39	23.88
chr10	25822072	25822573	502	275	25822347	22	107.91	11.99
chr10	28631850	28632474	625	307	28632157	73	460.66	29.11
chr10	28758709	28759220	512	265	28758974	24	154.09	15.05
chr10	29006093	29006642	550	266	29006359	27	124.02	16.35
chr10	29335019	29335261	243	101	29335120	12	98.52	20.31
chr10	30408279	30408648	370	268	30408547	20	157.74	31.84
chr10	32088922	32089515	594	368	32089290	53	297.27	16.72
chr10	32707531	32707956	426	210	32707741	27	193.77	28.88
chr10	33251159	33251478	320	106	33251265	17	90.64	11.49
chr10	38731736	38731984	249	97	38731833	12	107.85	27.35
chr10	42183181	42183877	697	387	42183568	173	1791.2	96.38
chr10	42290752	42291160	409	167	42290919	16	96.76	16.72
chr10	43233348	43233938	591	303	43233651	38	156.71	9.88
chr10	45285795	45286523	729	451	45286246	47	155.98	10.36
chr10	45488033	45488481	449	279	45488312	25	136.52	20.06
chr10	48040081	48040800	720	377	48040458	59	343.91	25
chr10	48102143	48102549	407	215	48102358	25	167.01	16.44
chr10	48276550	48277040	491	228	48276778	22	137.83	26.48
chr10	51756497	51757103	607	262	51756759	44	122.6	7.5
chr10	51847987	51848511	525	301	51848288	36	200.58	26.55
chr10	51979941	51980538	598	293	51980234	30	111.05	11.15
chr10	57790802	57791377	576	282	57791084	154	1422.92	62.69
chr10	61570166	61570775	610	288	61570454	37	135.42	12.71
chr10	62207790	62208487	698	392	62208182	139	1251.56	70.39
chr10	63195160	63195911	752	418	63195578	56	258.69	22.19
chr10	64666102	64666445	344	240	64666342	18	93.96	14.63
chr10	69267580	69268205	626	377	69267957	41	187.43	16.1
chr10	70330523	70331164	642	394	70330917	193	2060.47	107.35
chr10	70418278	70418819	542	154	70418432	126	849.85	34.52
chr10	70745173	70745851	679	308	70745481	59	101.13	7.17
chr10	70855141	70855611	471	284	70855425	28	132.46	17.6
chr10	70880957	70881573	617	257	70881214	94	898.32	79.73
chr10	71812168	71812790	623	339	71812507	46	182.37	17.16
chr10	71958361	71958958	598	356	71958717	44	132.21	12.07
chr10	72009169	72009711	543	339	72009508	48	207.61	15.89
chr10	72753099	72753643	545	252	72753351	56	352.81	38.93
chr10	72939295	72939568	274	112	72939407	18	122.25	18.44
chr10	73198562	73199108	547	276	73198838	33	138.68	16.18
chr10	73226655	73227257	603	320	73226975	38	115.5	11.33
chr10	73565839	73566529	691	147	73565986	53	372.66	34.83
chr10	73703268	73703929	662	331	73703599	67	260.53	15.81
chr10	73727563	73728272	710	364	73727927	102	529.43	27.86
chr10	74121529	74122066	538	283	74121812	59	283.11	22.75
chr10	74538810	74539104	295	186	74538996	19	122.07	15.09
chr10	75211602	75211976	375	157	75211759	33	141.21	12.94
chr10	75214672	75215436	765	396	75215068	126	628.14	26.35
chr10	75427443	75428157	715	398	75427841	94	478.19	25.08
chr10	76255640	76256734	1095	645	76256285	482	3100	59.49
chr10	79012604	79012963	360	109	79012713	20	102.57	14.75
chr10	79458745	79459767	1023	570	79459315	135	585.81	24.06
chr10	79463104	79463884	781	465	79463569	72	284.1	14.19
chr10	79564694	79565057	364	195	79564889	29	144.46	19.02
chr10	79649551	79649835	285	111	79649662	17	107.49	19.06
chr10	79729816	79730541	726	483	79730299	33	139.16	15.3
chr10	79836698	79837122	425	224	79836922	69	615.91	50.75
chr10	79878703	79879144	442	186	79878889	19	93.65	16.72
chr10	80452202	80453096	895	258	80452460	117	614.76	30.82
chr10	80786818	80787356	539	235	80787053	31	162.81	23.28
chr10	80875335	80876028	694	260	80875595	43	174.98	15.67
chr10	82433862	82434534	673	313	82434175	66	577.91	64.29
chr10	85888867	85889540	674	340	85889207	70	402.96	29.8
chr10	86083784	86084409	626	359	86084143	30	109.04	9.59
chr10	88087709	88088182	474	169	88087878	31	228.94	34.87
chr10	88271319	88271949	631	314	88271633	68	532.44	56.26
chr10	91393569	91394033	465	223	91393792	32	173.59	19.5
chr10	91450897	91451731	835	329	91451226	73	471.91	37.58
chr10	94342580	94343028	449	196	94342776	25	108.81	15.85
chr10	94506055	94506435	381	161	94506216	21	101.63	13
chr10	94827608	94828084	477	291	94827899	18	111.82	16.72
chr10	97311056	97311369	314	126	97311182	18	117.01	18.37
chr10	97443236	97444057	822	546	97443782	98	688.57	41.23
chr10	97792770	97793589	820	470	97793240	90	699.27	62.1
chr10	99042001	99042829	829	509	99042510	152	1541.83	90.72
chr10	99195579	99196103	525	223	99195802	138	1402.97	88.87
chr10	99382866	99383894	1029	411	99383277	180	1466.64	85.26
chr10	99389960	99390586	627	406	99390366	59	454.51	32.15
chr10	101180040	101180972	933	542	101180582	245	2468.73	102.95
chr10	101370110	101370762	653	294	101370404	196	2190.5	85.35
chr10	101408794	101409438	645	305	101409099	81	642.57	41.8
chr10	102017139	102017732	594	292	102017431	48	276.01	21.67
chr10	102096578	102097044	467	207	102096785	42	323.93	41.64
chr10	102122914	102123657	744	329	102123243	60	321.86	30.09
chr10	102231158	102231788	631	303	102231461	78	733.12	84.39
chr10	102662334	102662966	633	286	102662620	76	537.18	35.2
chr10	102780648	102781283	636	314	102780962	126	1233.77	91.44
chr10	103008084	103008388	305	107	103008191	16	116.15	20.06
chr10	103338762	103339210	449	169	103338931	23	190.93	38.21
chr10	103869033	103869812	780	457	103869490	101	838.96	75.23
chr10	103882390	103882870	481	285	103882675	24	92.22	11.26
chr10	103975665	103976284	620	318	103975983	51	312.8	27.54
chr10	103994746	103995597	852	457	103995203	252	2721.92	93.81
chr10	104143852	104144479	628	314	104144166	38	244.27	23.68
chr10	104210831	104211254	424	278	104211109	22	107.91	15.19
chr10	104251560	104252959	1400	444	104252004	212	1377.57	62.42
chr10	104253346	104253894	549	296	104253642	56	374.13	30.29
chr10	104464017	104464495	479	301	104464318	23	119.84	13.14
chr10	104493036	104493835	800	493	104493529	146	1351.38	86.73
chr10	104667532	104668491	960	452	104667984	121	865.79	44
chr10	105146024	105146591	568	270	105146294	56	325.35	32.64
chr10	105396089	105396335	247	120	105396209	16	107.77	16.72
chr10	105486445	105486930	486	300	105486745	23	125.2	21.86
chr10	105871601	105871979	379	202	105871803	22	153.42	19.76
chr10	105981928	105982542	615	216	105982144	104	1095.1	99.88
chr10	105996807	105997134	328	225	105997032	13	101.96	19.11
chr10	111903201	111903557	357	134	111903335	19	115.24	20.58
chr10	111960797	111961353	557	263	111961060	91	773.53	68.73
chr10	112621357	112621868	512	246	112621603	28	148.89	25.64
chr10	112668786	112669432	647	353	112669139	36	220.36	27.86
chr10	115923809	115924243	435	213	115924022	37	289.77	33.44
chr10	116102725	116103128	404	140	116102865	15	95	22.29
chr10	116643023	116643402	380	112	116643135	20	160.73	27.53
chr10	118968124	118968428	305	178	118968302	16	132.16	27.51
chr10	119646063	119646422	360	121	119646184	20	136.69	22.57
chr10	120091480	120092173	694	374	120091854	103	1042.91	107.91
chr10	120778647	120779065	419	269	120778916	24	196.15	35.53
chr10	121346425	121346955	531	279	121346704	32	179.24	17.76
chr10	124849447	124849942	496	303	124849750	26	220.11	34.8
chr10	124903465	124904220	756	354	124903819	116	923.72	54.56
chr10	125651102	125651435	334	189	125651291	14	114.18	27.35
chr10	126595076	126595667	592	260	126595336	72	654.46	67.87
chr10	129814559	129814991	433	178	129814737	44	473.53	90.76
chr10	131798843	131799872	1030	597	131799440	207	2148.81	121.77
chr10	133472386	133472826	441	230	133472616	20	161.69	39.77
chr10	133998952	133999266	315	112	133999064	18	139.55	23.12
chr10	135117060	135117539	480	272	135117332	43	203.4	18.52
chr11	319261	320026	766	398	319659	159	1280.38	64.03
chr11	525467	526007	541	191	525658	93	762.76	49.33
chr11	550634	551289	656	294	550928	108	953.21	75.54
chr11	558310	558767	458	233	558543	42	269.67	26.94
chr11	566069	566473	405	152	566221	20	92.25	10.64
chr11	799453	800051	599	353	799806	43	191.5	12.16
chr11	1419904	1420400	497	209	1420113	22	169.97	28.66
chr11	1542303	1542797	495	185	1542488	24	150.8	20.31
chr11	2677520	2678343	824	426	2677946	172	1717.93	81.45
chr11	2969811	2970513	703	373	2970184	143	1071.53	47.17
chr11	3356703	3357371	669	322	3357025	75	406.95	28.58
chr11	3775054	3776038	985	399	3775453	216	1772.07	51.49
chr11	4585760	4586664	905	353	4586113	168	1297.46	50.16
chr11	4985336	4985797	462	238	4985574	25	181.85	35.95
chr11	5258404	5258771	368	126	5258530	22	107.91	12.3
chr11	5569455	5569766	312	99	5569554	26	200.3	24.78
chr11	5662456	5663242	787	465	5662921	73	333.68	23.92
chr11	6212294	6212949	656	212	6212506	53	234.3	16.72
chr11	6454378	6454800	423	180	6454558	22	106.14	16.82
chr11	7964961	7965555	595	373	7965334	86	730.65	52.25
chr11	9438403	9439489	1087	462	9438865	426	3100	51.48
chr11	9551303	9552034	732	474	9551777	51	249.36	18.48
chr11	10406506	10406964	459	297	10406803	31	186.66	16.44
chr11	10786819	10787507	689	305	10787124	91	465.15	22.62
chr11	10835848	10836780	933	382	10836230	110	577.17	25.94
chr11	10962419	10962831	413	156	10962575	22	102.86	13.93
chr11	11600044	11600601	558	192	11600236	71	641.55	53.31
chr11	12806348	12806898	551	313	12806661	28	102.2	16.1
chr11	13255121	13255988	868	573	13255694	144	1448.22	101.7
chr11	13646244	13647074	831	473	13646717	131	1204.7	70.82
chr11	14869995	14870768	774	449	14870444	136	1061.84	68.51
chr11	15539510	15539766	257	157	15539667	13	114.92	23.55
chr11	17165165	17165339	175	88	17165253	15	174.89	25.59
chr11	17185937	17186323	387	187	17186124	28	144.93	16.72
chr11	17254456	17255107	652	331	17254787	134	1051.63	58.51
chr11	17681959	17682612	654	351	17682310	87	783.92	73.3
chr11	18612245	18612896	652	343	18612588	53	153.6	14.15
chr11	18676535	18676995	461	290	18676825	25	128.89	16.93
chr11	19094831	19095562	732	394	19095225	100	721.47	47.32
chr11	19218934	19219372	439	273	19219207	55	413.84	35.83
chr11	19690704	19691088	385	190	19690894	19	98.74	15.6
chr11	20053707	20054238	532	242	20053949	28	159.05	20.33
chr11	22603202	22604470	1269	793	22603995	287	2323.94	93.86
chr11	28086094	28086581	488	246	28086340	45	199.74	12.26
chr11	31487274	31488235	962	530	31487804	189	1769.29	86.54
chr11	31789102	31789750	649	420	31789522	54	359.44	27.86
chr11	32306564	32307037	474	256	32306820	17	106.18	25.27
chr11	32561611	32562152	542	276	32561887	36	216.08	26.05
chr11	33307829	33308140	312	144	33307973	18	138.55	20.86
chr11	33922762	33923350	589	398	33923160	41	214.02	13.48
chr11	34335982	34336515	534	246	34336228	43	309.58	42.44
chr11	34416524	34417382	859	482	34417006	182	1762.1	91.46
chr11	34787823	34788127	305	108	34787931	16	102.93	19.19
chr11	34891780	34892210	431	252	34892032	18	93.8	18.29
chr11	35133199	35133559	361	112	35133311	15	97.33	24.13
chr11	36312124	36312506	383	123	36312247	21	142.36	24.32
chr11	36564760	36564998	239	133	36564893	19	200.67	39.77
chr11	36572420	36572702	283	112	36572532	20	97.81	10.9
chr11	38696219	38696710	492	238	38696457	22	174.6	27.35
chr11	43658412	43659032	621	204	43658616	36	235.28	22.25
chr11	43858620	43859244	625	282	43858902	72	579.35	51.08
chr11	44378635	44379024	390	139	44378774	22	143	19.5
chr11	44878009	44878589	581	251	44878260	63	501.35	44.18
chr11	45125134	45125567	434	257	45125391	67	673.75	66.87
chr11	45496212	45496609	398	182	45496394	24	189.46	35.29
chr11	45556438	45556854	417	198	45556636	48	447.6	56.23
chr11	45571959	45572497	539	320	45572279	70	673.94	69.09
chr11	45624738	45625266	529	173	45624911	61	562.95	65.35
chr11	45700117	45700692	576	310	45700427	41	341.31	49.4
chr11	45824964	45825742	779	486	45825450	58	220.2	12.43
chr11	45896037	45896546	510	196	45896233	31	96.54	11.15
chr11	45896690	45897146	457	264	45896954	35	164.02	14.63
chr11	45960958	45961641	684	313	45961271	40	164.9	11.15
chr11	46091106	46091506	401	190	46091296	20	118.55	21.45
chr11	46227644	46228420	777	307	46227951	56	176.57	14.69
chr11	46273563	46274082	520	258	46273821	53	265.74	25.67
chr11	46620946	46621525	580	316	46621262	41	264.69	24.24
chr11	46823988	46824901	914	440	46824428	167	1588.46	94.96
chr11	47154894	47155400	507	195	47155089	46	263.51	21.5
chr11	47404395	47404966	572	272	47404667	31	101.66	11.84
chr11	47745331	47745957	627	399	47745730	220	2481.78	110.94
chr11	47895889	47896378	490	277	47896166	29	100.84	11.97
chr11	47921872	47922452	581	328	47922200	36	129.9	11.57
chr11	47939512	47939902	391	101	47939613	27	231.8	41.4
chr11	57023506	57024066	561	322	57023828	29	110.95	12.74
chr11	57191230	57192231	1002	301	57191531	166	1179.77	38.86
chr11	57235691	57236987	1297	771	57236462	309	2485.49	59.71
chr11	57285300	57286164	865	509	57285809	163	1586.34	118.14
chr11	58102706	58103220	515	267	58102973	55	395.99	28.86
chr11	58424648	58425242	595	257	58424905	50	417.62	48.08
chr11	58487612	58488071	460	188	58487800	20	136.69	30.76
chr11	58582469	58582822	354	106	58582575	23	195.47	39.46
chr11	58666956	58667390	435	165	58667121	23	149.08	19.41
chr11	59069340	59069818	479	221	59069561	30	182.44	17.91
chr11	59139552	59140843	1292	469	59140021	649	3100	126.72
chr11	59484534	59485059	526	295	59484829	66	480.98	34.3
chr11	60430473	60431020	548	389	60430862	42	270.16	26.75
chr11	60686176	60686669	494	293	60686469	32	152	17.38
chr11	61338457	61339663	1207	772	61339229	72	219.01	11.15
chr11	61473436	61474063	628	365	61473801	76	345.45	21.91
chr11	61566028	61566437	410	192	61566220	23	94.24	11.42
chr11	61647623	61648478	856	381	61648004	224	1850.49	53.04
chr11	62080109	62080608	500	248	62080357	37	156.71	14.79
chr11	62115529	62116102	574	273	62115802	75	352.26	18.92
chr11	62123065	62123717	653	381	62123446	65	255.78	11.15
chr11	62170503	62171043	541	290	62170793	60	385.33	25.48
chr11	62188988	62189560	573	317	62189305	40	198.57	21.73
chr11	62196282	62196601	320	103	62196385	24	137.56	13.2
chr11	62251341	62252778	1438	676	62252017	253	1694.25	48.43
chr11	62277691	62278679	989	527	62278218	344	3100	73.79
chr11	62295084	62295708	625	303	62295387	57	260.59	20.3
chr11	62355387	62356591	1205	450	62355837	258	2229.81	92.21
chr11	62365928	62366397	470	227	62366155	37	224.94	25.08
chr11	63498276	63498806	531	220	63498496	128	980.22	34.99
chr11	63709219	63710525	1307	620	63709839	653	3100	78.02
chr11	63793937	63794386	450	188	63794125	32	102.64	9.83
chr11	63808447	63809057	611	313	63808760	64	332.56	26.01
chr11	63841363	63842228	866	284	63841647	74	272.53	19.85
chr11	63896860	63897511	652	290	63897150	148	1062.17	44.59
chr11	63968899	63969332	434	141	63969040	20	104.12	14.51
chr11	64247029	64247759	731	271	64247300	79	670.72	72.06
chr11	64302465	64303278	814	457	64302922	114	613.92	25.2
chr11	64334600	64335086	487	192	64334792	27	116.06	12.54
chr11	64441043	64441710	668	304	64441347	58	211.08	16.99
chr11	64537854	64538530	677	312	64538166	54	214.36	16.14
chr11	64635558	64636122	565	274	64635832	55	273.07	23.53
chr11	64658707	64659473	767	446	64659153	125	793.91	27.86
chr11	64693915	64694421	507	295	64694210	34	91.97	11.3
chr11	64878380	64879011	632	336	64878716	62	434.62	42.84
chr11	64895147	64895603	457	302	64895449	22	94.5	11.15
chr11	64950906	64951796	891	268	64951174	43	100.54	8.36
chr11	65011420	65012049	630	366	65011786	84	308.73	12.46
chr11	65030424	65031955	1532	281	65030705	88	207.4	8.54
chr11	65139071	65139850	780	474	65139545	215	1866.05	62.69
chr11	65268376	65268836	461	267	65268643	22	171.78	36.15
chr11	65357647	65358260	614	269	65357916	105	1086.89	91.95
chr11	65382096	65382734	639	316	65382412	44	150.92	11.81
chr11	65384185	65384864	680	418	65384603	39	128.97	10.29
chr11	65525916	65526588	673	328	65526244	37	113.05	9.29
chr11	65575996	65576502	507	298	65576294	45	175.21	13.96
chr11	65812833	65813939	1107	434	65813267	249	1949.33	68.06
chr11	65868943	65869317	375	266	65869209	43	230.8	14.25
chr11	65883578	65884038	461	299	65883877	45	396.86	52.05
chr11	66004027	66004643	617	340	66004367	103	726.81	38.58
chr11	66069923	66070507	585	234	66070157	100	731.71	43.47
chr11	66140214	66141043	830	400	66140614	125	628.66	31.29
chr11	66162199	66163108	910	437	66162636	294	2874.26	86.94
chr11	66416172	66416614	443	200	66416372	26	97.25	12.79
chr11	66438978	66439416	439	201	66439179	28	159.05	19.92
chr11	66482152	66483135	984	370	66482522	197	1413.71	47.65
chr11	66530480	66531052	573	321	66530801	60	336	26
chr11	66763723	66764383	661	282	66764005	46	121.02	9.68
chr11	66877176	66877971	796	496	66877672	99	569.16	37.15
chr11	66915729	66916288	560	252	66915981	32	138.18	11.7
chr11	67006826	67007823	998	628	67007454	148	870.2	36.71
chr11	67031897	67032972	1076	483	67032380	299	2356.79	60.97
chr11	67095496	67095897	402	208	67095704	19	118.96	19.76
chr11	67554209	67555035	827	467	67554676	207	1416.09	39.71
chr11	67645214	67645861	648	273	67645487	42	212.6	20.43
chr11	67984041	67985014	974	585	67984626	244	2092.94	74.91
chr11	68304859	68305347	489	228	68305087	27	104.07	11.15
chr11	68498797	68499171	375	101	68498898	23	94.24	10.45
chr11	68666923	68667346	424	220	68667143	27	150.13	15.19
chr11	68758703	68759359	657	345	68759048	56	324.88	31.68
chr11	68906166	68906895	730	251	68906417	119	733.96	42.45
chr11	68967120	68967701	582	336	68967456	44	162.27	12.68
chr11	69323389	69323843	455	247	69323636	32	252.37	36.78
chr11	69794110	69794468	359	190	69794300	24	131.79	14.86
chr11	69986775	69987228	454	259	69987034	30	218.14	30.36
chr11	70093295	70093638	344	184	70093479	13	99.31	21.5
chr11	70836872	70837521	650	288	70837160	127	1164.2	77.09
chr11	71317178	71317894	717	489	71317667	51	182.62	14.99
chr11	71469063	71469612	550	345	71469408	48	259.76	16.09
chr11	71491875	71492375	501	262	71492137	41	187.12	19.93
chr11	71500675	71501591	917	466	71501141	153	809.69	20.48
chr11	72110891	72111615	725	423	72111314	97	664.61	36.48
chr11	73149728	73150482	755	333	73150061	98	788.55	46.28
chr11	73168080	73168748	669	368	73168448	33	90.53	6.19
chr11	73265285	73265869	585	304	73265589	49	246.84	21.28
chr11	73371740	73372358	619	353	73372093	85	430.28	21.5
chr11	73559586	73560170	585	186	73559772	43	166.87	13.14
chr11	73881689	73882122	434	110	73881799	21	110.32	12.95
chr11	74337606	74338191	586	312	74337918	62	325.14	29.1
chr11	74682642	74683032	391	153	74682795	19	119.71	20.9
chr11	74923118	74923657	540	255	74923373	31	90.6	10.03
chr11	74943059	74943659	601	326	74943385	39	134.25	13.59
chr11	75062812	75063077	266	109	75062921	15	140.28	29.83
chr11	75203227	75204197	971	610	75203837	301	2941.37	91.95
chr11	75623723	75624415	693	376	75624099	45	127.87	9.93
chr11	75833176	75833759	584	199	75833375	48	203.77	16.12
chr11	76232671	76232942	272	142	76232813	18	165.21	32.15
chr11	77209498	77210011	514	261	77209759	26	90.62	8
chr11	77383149	77383961	813	478	77383627	141	955.58	35.23
chr11	78903474	78903793	320	166	78903640	13	95.91	18.81
chr11	82092461	82092848	388	156	82092617	16	100.19	21.73
chr11	82290179	82290680	502	243	82290422	31	132.34	13.68
chr11	82545004	82545914	911	526	82545530	191	1587.74	43.61
chr11	85016885	85017497	613	254	85017139	36	138.73	12.36
chr11	85036333	85036897	565	355	85036688	35	142.01	11.63
chr11	85690623	85691184	562	224	85690847	50	280.95	20.7
chr11	86343931	86344386	456	214	86344145	26	101.7	15.26
chr11	93866434	93867021	588	343	93866777	71	367.93	23.19
chr11	94346235	94346759	525	210	94346445	43	180.57	16.38
chr11	94441277	94441807	531	357	94441634	68	649.62	70.16
chr11	94603934	94604509	576	203	94604137	84	509.11	26.06
chr11	95162471	95163733	1263	792	95163263	193	1182.76	35.95
chr11	101290614	101291117	504	268	101290882	21	111.86	22.29
chr11	102009327	102009752	426	220	102009547	22	188	32.32
chr11	102467870	102468345	476	244	102468114	33	148.55	15.26
chr11	105397888	105398896	1009	549	105398437	325	3100	98.55
chr11	105452930	105453512	583	394	105453324	103	848.65	51.98
chr11	107303842	107304477	636	243	107304085	159	2011.73	137.09
chr11	107497239	107497676	438	109	107497348	31	172.11	14.86
chr11	107598294	107598998	705	322	107598616	59	258.28	19.81
chr11	107843220	107843712	493	314	107843534	32	91.33	8.24
chr11	107969399	107970029	631	314	107969713	68	376	29.01
chr11	108040661	108041080	420	301	108040962	39	226.72	18.72
chr11	111302604	111303309	706	459	111303063	40	141.29	10.45
chr11	116034227	116034622	396	142	116034369	20	104.12	15.45
chr11	116554365	116554851	487	294	116554659	31	105.98	12.79
chr11	116703435	116703867	433	278	116703713	133	1390.06	85.26
chr11	117362117	117362521	405	167	117362284	38	169.13	15.64
chr11	117656232	117656569	338	177	117656409	13	102.52	22.37
chr11	118168529	118169067	539	277	118168806	46	242.16	21.78
chr11	118303983	118304899	917	592	118304575	121	616.41	32.42
chr11	118432903	118433702	800	395	118433298	77	492.46	34.37
chr11	118460646	118461411	766	382	118461028	74	416.81	30.4
chr11	118471294	118472003	710	257	118471551	198	1858.7	52.37
chr11	118484264	118484876	613	314	118484578	57	213.17	19.57
chr11	118497060	118497888	829	403	118497463	133	817.88	35.59
chr11	118571520	118572031	512	281	118571801	37	204.97	27.86
chr11	118709877	118710709	833	502	118710379	134	961.92	49.46
chr11	119715446	119715870	425	236	119715682	20	92.25	13.2
chr11	120668401	120668930	530	222	120668623	38	226.41	22.99
chr11	122437916	122438590	675	282	122438198	69	492.76	34.48
chr11	124486047	124487307	1261	699	124486746	293	2328.21	56.13
chr11	124499035	124499751	717	414	124499449	80	617.31	46.81
chr11	124967370	124968359	990	535	124967905	336	3100	86.69
chr11	125262460	125262909	450	198	125262658	35	146	12.54
chr11	125643732	125644776	1045	429	125644161	132	697.17	31.21
chr11	125721274	125721878	605	347	125721621	39	154.77	15.99
chr11	126431395	126431828	434	281	126431676	28	213.31	31.77
chr11	129189733	129190085	353	117	129189850	16	133.18	34.8
chr11	129377656	129378584	929	589	129378245	219	1977.12	53.2
chr11	129444632	129445115	484	313	129444945	34	196.84	20.14
chr11	130160572	130160817	246	141	130160713	13	98.12	20.06
chr11	133598809	133599494	686	354	133599163	104	677.84	38.39
chr11	133844714	133845197	484	265	133844979	25	143.22	21.86
chr12	380664	381342	679	324	380988	154	2032.38	198.53
chr12	1283635	1284078	444	215	1283850	16	98.2	20.41
chr12	1670086	1670615	530	281	1670367	27	130.1	17.76
chr12	1689398	1689586	189	95	1689493	12	138.6	29.83
chr12	1783882	1784275	394	229	1784111	75	768.78	71.65
chr12	2791662	2792395	734	384	2792046	94	587.72	33.41
chr12	2870014	2870591	578	259	2870273	103	1147.94	114.35
chr12	4300298	4300835	538	291	4300589	25	99.13	10.79
chr12	6347680	6348002	323	216	6347896	16	95.05	14.15
chr12	6449896	6450672	777	296	6450192	88	617.02	39.94
chr12	6473147	6473847	701	263	6473410	104	917.63	46.81
chr12	6696318	6696607	290	80	6696398	15	134.63	29.83
chr12	6703131	6703677	547	261	6703392	37	173.73	15.92
chr12	6743549	6744188	640	326	6743875	63	495.49	43.73
chr12	6830348	6832080	1733	440	6830788	362	2601.92	72.45
chr12	6922730	6923371	642	267	6922997	52	371.29	25.72
chr12	6949980	6950372	393	197	6950177	17	92.23	13.14
chr12	6995798	6996652	855	313	6996111	64	290.19	16.72
chr12	7173746	7174577	832	477	7174223	102	744.28	45.51
chr12	8070257	8071000	744	347	8070604	123	1072.16	71.79
chr12	8993416	8993926	511	228	8993644	29	137.44	13
chr12	12769433	12770159	727	475	12769908	44	279.81	19.5
chr12	14847434	14848218	785	402	14847836	140	1322.87	90.77
chr12	21545495	21546298	804	428	21545923	212	2416.81	123
chr12	21701902	21702342	441	235	21702137	20	108.9	15.67
chr12	25430263	25430770	508	246	25430509	27	134.47	17.76
chr12	27066497	27067008	512	208	27066705	37	222.1	26.12
chr12	27567973	27568652	680	302	27568275	132	1005.57	48.87
chr12	28174744	28175292	549	262	28175006	25	95.32	8.8
chr12	29287096	29287534	439	210	29287306	16	98.2	20.18
chr12	32049746	32050146	401	163	32049909	30	136	14.08
chr12	32723276	32723685	410	110	32723386	25	90.58	11.22
chr12	33632451	33632869	419	298	33632749	25	136.97	14.63
chr12	40918209	40918724	516	238	40918447	23	113.23	21.5
chr12	43995273	43995702	430	253	43995526	23	93.96	15.13
chr12	45115765	45116049	285	110	45115875	19	137.12	20.39
chr12	46877927	46878638	712	361	46878288	59	273.78	18.11
chr12	47303293	47303566	274	147	47303440	16	144.07	31.63
chr12	47362022	47362653	632	338	47362360	190	1624.15	69.74
chr12	47532076	47532626	551	270	47532346	42	148.9	9.93
chr12	47545676	47546403	728	342	47546018	154	1223.14	61.09
chr12	47749815	47750396	582	257	47750072	38	138.22	14.86
chr12	47790626	47791471	846	377	47791003	161	1137.33	59.96
chr12	47818538	47819132	595	354	47818892	40	191.59	15.75
chr12	47913728	47914434	707	352	47914080	85	393.15	24.59
chr12	47944826	47945290	465	195	47945021	29	141.88	15.84
chr12	48002834	48003591	758	408	48003242	156	1315.75	64.85
chr12	48303299	48303775	477	284	48303583	53	401.48	38.66
chr12	48387496	48388060	565	243	48387739	105	872.99	59.04
chr12	48421205	48421808	604	258	48421463	110	601.36	25.04
chr12	48705342	48705906	565	281	48705623	37	183.21	20.24
chr12	48791582	48792640	1059	303	48791885	199	1241.39	29.62
chr12	48964385	48964805	421	168	48964553	38	188.02	14.08
chr12	49604815	49605201	387	208	49605023	21	109.93	15.67
chr12	49706112	49706770	659	360	49706472	76	512.26	38
chr12	49727803	49728565	763	520	49728323	73	290.14	16.21
chr12	49852754	49853573	820	459	49853213	145	1094.47	49.46
chr12	49918597	49919654	1058	661	49919258	243	1843.98	66.87
chr12	50104558	50105081	524	279	50104837	34	199.78	22.29
chr12	50432618	50432971	354	145	50432763	21	127.73	18.94
chr12	50652712	50653252	541	246	50652958	30	99.63	9.69
chr12	50712854	50713344	491	225	50713079	41	239.66	26.4
chr12	51284808	51285403	596	294	51285102	33	173.12	21.04
chr12	51554131	51554638	508	248	51554379	31	125.94	13.08
chr12	51758741	51760134	1394	787	51759528	232	1802.39	92.42
chr12	51947953	51948671	719	303	51948256	55	210.77	15.63
chr12	52059163	52060417	1255	812	52059975	812	3100	90.38
chr12	52121391	52122112	722	325	52121716	147	1193.81	65.48
chr12	52180495	52181564	1070	460	52180955	150	716.07	27.28
chr12	52305683	52306803	1121	439	52306122	243	1766.47	60.94
chr12	52376165	52376820	656	370	52376535	63	452.32	44.58
chr12	52399666	52400043	378	242	52399908	27	150.13	18.96
chr12	52618426	52618837	412	254	52618680	28	208.29	28.88
chr12	52679864	52680400	537	260	52680124	30	97.59	12.04
chr12	52720057	52720690	634	318	52720375	53	317.95	27.54
chr12	52839207	52839624	418	173	52839380	30	168.77	14.86
chr12	52868895	52869379	485	230	52869125	35	221.79	28.24
chr12	52959354	52961385	2032	1284	52960638	558	3100	59.18
chr12	52975611	52976283	673	371	52975982	42	137.99	14.86
chr12	53004375	53005670	1296	728	53005103	298	2109.6	60.97
chr12	53038918	53039730	813	467	53039385	153	967.89	30.98
chr12	53177482	53177989	508	245	53177727	70	377.94	20.48
chr12	53240315	53240850	536	326	53240641	54	231.4	18.42
chr12	54497181	54498571	1391	862	54498043	451	3100	71.79
chr12	54509579	54510058	480	144	54509723	77	639.32	51.72
chr12	54646539	54647057	519	288	54646827	34	121.33	10.75
chr12	54653249	54654426	1178	746	54653995	452	3100	71.05
chr12	54676898	54677593	696	312	54677210	90	408.55	27.15
chr12	54721503	54722004	502	364	54721867	45	204.63	17.96
chr12	54806758	54807139	382	233	54806991	35	185.77	19.19
chr12	54807591	54808571	981	484	54808075	135	784.06	29.4
chr12	54838069	54838588	520	303	54838372	38	134.81	14.02
chr12	54904007	54904671	665	308	54904315	134	842.38	29.8
chr12	54980175	54980874	700	315	54980490	74	354.61	22.29
chr12	55013419	55014626	1208	692	55014111	162	899.09	28.98
chr12	55040078	55040681	604	353	55040431	69	506.9	31.47
chr12	55325661	55326917	1257	446	55326107	401	3183.72	69.07
chr12	55758595	55759487	893	527	55759122	249	2687.95	71.79
chr12	56135011	56135655	645	265	56135276	111	731.44	44.03
chr12	56200275	56201020	746	422	56200697	88	412.99	24.09
chr12	56227121	56227549	429	167	56227288	28	120.81	15.78
chr12	56294040	56294753	714	337	56294377	56	218.29	15.57
chr12	56373698	56374436	739	368	56374066	190	1408.97	43.24
chr12	56424499	56425397	899	504	56425003	184	1325.19	51.27
chr12	56552492	56552756	265	146	56552638	30	264.8	29.58
chr12	56767370	56767811	442	110	56767480	21	141.74	17.42
chr12	61590617	61590948	332	124	61590741	24	139.2	13.93
chr12	61613192	61613633	442	211	61613403	24	138.82	13.55
chr12	62523583	62524010	428	225	62523808	28	159.35	18.95
chr12	63844842	63845163	322	108	63844950	13	92.88	15.92
chr12	63849175	63849741	567	293	63849468	35	142.01	12.4
chr12	65147968	65148367	400	228	65148196	20	121.83	18.11
chr12	65948371	65949454	1084	559	65948930	226	1317.91	37.82
chr12	66042506	66042995	490	259	66042765	54	512.41	61.86
chr12	66903138	66903616	479	229	66903367	26	116.34	13.35
chr12	67012175	67012866	692	359	67012534	109	905.37	53.87
chr12	67472885	67473513	629	298	67473183	51	304.2	29.64
chr12	68039931	68040561	631	328	68040259	58	238.06	17.76
chr12	70366076	70366728	653	288	70366364	36	98.18	8.92
chr12	74191592	74192144	553	246	74191838	41	147.51	14.14
chr12	74572882	74573494	613	295	74573177	56	393.07	42.35
chr12	75266060	75266725	666	369	75266429	74	409.02	29.58
chr12	75983216	75983864	649	357	75983573	69	470.91	38.08
chr12	88311647	88312116	470	274	88311921	22	107.91	13.47
chr12	88627351	88627853	503	248	88627599	25	108.26	15.79
chr12	90552166	90553201	1036	666	90552832	63	381.8	34.59
chr12	91063573	91064263	691	257	91063830	77	425.66	20.58
chr12	91321559	91322137	579	352	91321911	29	123.9	11.15
chr12	91427220	91427620	401	179	91427399	17	107.32	15.05
chr12	91847103	91847681	579	294	91847397	47	170.03	13.17
chr12	92232447	92233002	556	282	92232729	32	120.85	10.73
chr12	93372052	93372553	502	209	93372261	25	207.03	44.75
chr12	93377594	93378120	527	248	93377842	26	92.4	11.4
chr12	93872004	93872493	490	293	93872297	33	97.11	10.6
chr12	94135187	94135958	772	440	94135627	138	1004.09	52.73
chr12	94776425	94777340	916	384	94776809	245	2004.09	75.48
chr12	97357917	97358379	463	257	97358174	28	102.3	9.68
chr12	97433031	97433959	929	452	97433483	137	1008.72	59.71
chr12	97511210	97511745	536	317	97511527	76	564.68	37.47
chr12	99184571	99184904	334	172	99184743	22	120.93	17.65
chr12	99491373	99491768	396	105	99491478	18	93.45	9.55
chr12	100842485	100843056	572	222	100842707	61	452.78	40.38
chr12	100979892	100980269	378	136	100980028	31	129.33	11.7
chr12	101037759	101038354	596	300	101038059	40	143.43	14.33
chr12	102847404	102848551	1148	770	102848174	249	2128.76	78.25
chr12	102883341	102883872	532	314	102883655	59	237.15	16.52
chr12	103055756	103056258	503	328	103056084	72	579.35	46.72
chr12	103204598	103205101	504	252	103204850	38	143.41	11.7
chr12	104190904	104191258	355	223	104191127	16	113.04	22.29
chr12	104341711	104342261	551	283	104341994	32	196.13	25
chr12	104716075	104716665	591	293	104716368	32	247.27	52.25
chr12	105904801	105905314	514	359	105905160	43	277.96	24.77
chr12	106011180	106011969	790	329	106011509	71	357.29	20.9
chr12	106511610	106512080	471	198	106511808	40	254.76	28.54
chr12	106997621	106998002	382	204	106997825	28	186.58	25.55
chr12	107015370	107015903	534	241	107015611	27	144.7	19.38
chr12	107035211	107035833	623	291	107035502	93	800.61	62.69
chr12	107395612	107396026	415	170	107395782	25	121.27	16.72
chr12	107432654	107433414	761	361	107433015	176	1687.52	82.71
chr12	107609171	107609915	745	293	107609464	43	96.15	7.43
chr12	107618015	107618390	376	268	107618283	29	153.35	14.19
chr12	107857541	107857842	302	191	107857732	24	247.61	44.75
chr12	108019788	108020678	891	428	108020216	185	1775.07	107.2
chr12	108311277	108311717	441	217	108311494	30	273.42	48.09
chr12	108495189	108496186	998	655	108495844	207	1585.52	52.53
chr12	108802648	108803045	398	154	108802802	37	233.89	19.36
chr12	109001783	109002443	661	366	109002149	43	209	22
chr12	109024403	109024969	567	296	109024699	123	1438.15	120.07
chr12	109026503	109026848	346	108	109026611	19	144.79	23.62
chr12	109424082	109424616	535	261	109424343	52	299.94	28.12
chr12	109771949	109772330	382	99	109772048	21	120.88	14.13
chr12	109895191	109895421	231	120	109895311	13	96.33	18.24
chr12	109915682	109916107	426	195	109915877	22	121.63	16.72
chr12	109989260	109989741	482	194	109989454	45	323.91	30.09
chr12	110291062	110291677	616	244	110291306	35	170.14	12.78
chr12	110607929	110608476	548	305	110608234	56	245.85	21.78
chr12	111047292	111047999	708	377	111047669	241	2067.72	64.39
chr12	111506234	111506883	650	464	111506698	84	725.57	47.09
chr12	111638547	111639047	501	306	111638853	51	294.9	31.98
chr12	111684990	111685327	338	108	111685098	17	123.69	26.68
chr12	111883310	111883773	464	210	111883520	20	97.96	17.91
chr12	112106857	112107514	658	319	112107176	132	1165.71	67.71
chr12	112112798	112113417	620	417	112113215	82	509.29	25.91
chr12	112142915	112143883	969	498	112143413	272	2548.06	75.93
chr12	112290447	112290964	518	329	112290776	38	176.56	18.17
chr12	112315138	112315720	583	253	112315391	81	429.1	31.19
chr12	112610549	112610996	448	163	112610712	21	108.88	16.72
chr12	112662945	112663240	296	104	112663049	26	169.64	20.43
chr12	112695518	112696245	728	479	112695997	116	923.98	46.08
chr12	113164332	113164811	480	253	113164585	22	165.6	24.2
chr12	113716222	113716549	328	218	113716440	12	93.43	24.86
chr12	113788595	113788968	374	119	113788714	23	212.76	39.77
chr12	113880787	113881185	399	170	113880957	16	113.95	23.28
chr12	114060022	114060411	390	129	114060151	23	170.12	25.08
chr12	114114418	114114867	450	242	114114660	44	346.8	35.11
chr12	114686452	114686807	356	195	114686647	13	90.05	16.72
chr12	115281024	115281639	616	356	115281380	42	195.36	17.43
chr12	115371150	115371592	443	251	115371401	34	253.51	40.4
chr12	115660079	115660852	774	301	115660380	157	1134.56	44.45
chr12	115706219	115706874	656	371	115706590	51	286.82	25.59
chr12	115840678	115841083	406	167	115840845	27	124.02	14.33
chr12	116077374	116078101	728	353	116077727	90	448.23	23.33
chr12	116789625	116789977	353	129	116789754	16	117.27	19.67
chr12	117057874	117058352	479	330	117058204	45	282.17	23.76
chr12	117295025	117295608	584	248	117295273	78	682.54	54.93
chr12	117464131	117464527	397	204	117464335	24	156.4	22.57
chr12	117572756	117573119	364	136	117572892	30	218.14	24.34
chr12	117796965	117797446	482	276	117797241	35	278.74	41.8
chr12	118152007	118152339	333	206	118152213	28	256.82	42.68
chr12	118225408	118225753	346	247	118225655	34	293.78	36.15
chr12	118305433	118305839	407	185	118305618	18	100.78	13.61
chr12	118799241	118799969	729	435	118799676	63	278.33	15.84
chr12	119009107	119009675	569	282	119009389	31	134.78	16.72
chr12	119123012	119123656	645	410	119123422	205	2060.53	75.48
chr12	119239512	119240293	782	446	119239958	74	317.96	18.52
chr12	119417818	119418465	648	354	119418172	109	887.58	52.66
chr12	119503298	119503984	687	321	119503619	110	685.43	39.38
chr12	119608405	119609565	1161	822	119609227	136	919.61	44.88
chr12	120051034	120051674	641	273	120051307	46	315.86	38.85
chr12	120060351	120060873	523	257	120060608	40	269	31.05
chr12	120174879	120175370	492	203	120175082	30	218.14	29.61
chr12	120274288	120275069	782	409	120274697	150	1109.24	57.59
chr12	120321755	120322585	831	448	120322203	169	1460.85	69.26
chr12	120391757	120392095	339	175	120391932	46	340.85	29.15
chr12	120435841	120436358	518	291	120436132	29	109.04	11.55
chr12	120512467	120513219	753	181	120512648	159	1353.06	73.31
chr12	120579599	120579888	290	183	120579782	21	175.14	30.09
chr12	120585970	120586626	657	330	120586300	100	684.93	42.13
chr12	120641088	120641578	491	288	120641376	20	92.25	16.42
chr12	120688665	120689079	415	218	120688883	44	256.02	22.2
chr12	120724911	120725792	882	372	120725283	99	662.22	37.44
chr12	120856150	120856620	471	95	120856245	31	122.94	9.19
chr12	120986175	120987592	1418	384	120986559	222	1284.48	50.16
chr12	121000707	121001082	376	244	121000951	25	140.51	17.5
chr12	121247268	121247721	454	293	121247561	39	265.86	24.94
chr12	121551277	121551826	550	287	121551564	30	125.41	15.05
chr12	121577360	121577856	497	251	121577611	37	162.88	15.38
chr12	121800393	121800893	501	243	121800636	29	152.72	19.85
chr12	122282806	122284240	1435	536	122283342	237	1895.26	56.55
chr12	122434030	122434967	938	555	122434585	210	2077.5	73.76
chr12	122531196	122531630	435	288	122531484	23	116.53	19.85
chr12	122634772	122635270	499	191	122634963	28	154.65	25.19
chr12	122684037	122684473	437	221	122684258	30	135.43	14.54
chr12	122721248	122721905	658	335	122721583	67	418.15	38.45
chr12	122762540	122763039	500	225	122762765	35	204.97	26.83
chr12	122951257	122951642	386	177	122951434	16	98.2	17.75
chr12	123160178	123160779	602	247	123160425	96	879.11	69.33
chr12	123170411	123170895	485	207	123170618	34	269.26	37.53
chr12	123241466	123241871	406	199	123241665	25	128.57	17.65
chr12	123290891	123291371	481	318	123291209	38	201.91	19.3
chr12	123547052	123547600	549	262	123547314	27	104.24	12.54
chr12	123634243	123634870	628	329	123634572	60	513.88	54.69
chr12	123686548	123687017	470	240	123686788	31	194.32	25.08
chr12	123736962	123737315	354	111	123737073	20	119.25	20.3
chr12	123795136	123795604	469	215	123795351	52	393.85	34.48
chr12	123854383	123855010	628	278	123854661	45	269.03	26.79
chr12	123901231	123901745	515	317	123901548	42	292.36	33.44
chr12	123967502	123968337	836	327	123967829	89	500.71	29.26
chr12	124099807	124100582	776	401	124100208	107	829.77	45.41
chr12	124201693	124202154	462	235	124201928	29	177.22	28.66
chr12	124279022	124279541	520	245	124279267	28	144.46	16.3
chr12	124297911	124298421	511	211	124298122	37	323.72	46.89
chr12	124335461	124335887	427	146	124335607	18	128.75	25.08
chr12	125144335	125144724	390	259	125144594	20	118.55	20.86
chr12	126212834	126213536	703	197	126213031	68	411.48	33.45
chr12	126308025	126308279	255	92	126308117	14	109.02	22.64
chr12	126690624	126691020	397	235	126690859	23	159.37	31.92
chr12	127490863	127491339	477	282	127491145	20	118.55	19.14
chr12	127874270	127874851	582	288	127874558	49	347.67	42.57
chr12	129557278	129557676	399	251	129557529	29	203.11	27.01
chr12	129699750	129700129	380	181	129699931	15	92.29	15.05
chr12	130044387	130044823	437	185	130044572	26	141.36	21.92
chr12	130158699	130159170	472	245	130158944	35	225.31	22.55
chr12	130214449	130215216	768	347	130214796	110	1178.53	87.23
chr12	130244550	130245029	480	257	130244807	40	271.71	32.32
chr12	130293136	130293915	780	466	130293602	63	262.82	20.86
chr12	130301976	130302251	276	98	130302074	16	109.54	16.44
chr12	130402006	130402734	729	338	130402344	143	1192.63	47.23
chr12	130466246	130466861	616	266	130466512	74	492.54	41.19
chr12	130543935	130544369	435	232	130544167	35	314.23	49.96
chr12	130580229	130580757	529	276	130580505	35	207.82	20.06
chr12	130610629	130610963	335	238	130610867	17	92.23	16.8
chr12	130642593	130643130	538	378	130642971	62	557.84	56.21
chr12	130671070	130671369	300	126	130671196	17	114.85	18.11
chr12	130691588	130692052	465	280	130691868	23	174.65	22.99
chr12	130692729	130693200	472	197	130692926	54	376.52	35.07
chr12	131167907	131168433	527	326	131168233	34	254.72	30.09
chr12	131351167	131351569	403	234	131351401	17	114.33	20.43
chr12	131361743	131362250	508	242	131361985	29	166.29	20.3
chr12	131365706	131366132	427	228	131365934	27	175.1	24.43
chr12	131509878	131510293	416	189	131510067	34	264.7	35.42
chr12	131680567	131681029	463	240	131680807	29	140.05	17.65
chr12	131773953	131774337	385	161	131774114	16	94.5	15.2
chr12	131974069	131974566	498	258	131974327	41	246.12	26.94
chr12	131995148	131995674	527	170	131995318	41	382.08	61.67
chr13	18590356	18590767	412	263	18590619	27	253.39	44.75
chr13	19105394	19105951	558	363	19105757	55	478.97	51.31
chr13	19335622	19336115	494	256	19335878	132	1602.91	108.74
chr13	19430506	19431039	534	223	19430729	151	2223.45	214.95
chr13	20349159	20349510	352	88	20349247	14	111.02	19.89
chr13	20374804	20375154	351	149	20374953	16	127.03	27.11
chr13	20482731	20483214	484	258	20482989	23	178.29	31.63
chr13	25693704	25694426	723	359	25694063	139	1147.11	54.72
chr13	26029283	26029973	691	422	26029705	54	472.33	50.16
chr13	26823208	26823613	406	106	26823314	20	154.03	22.99
chr13	27092672	27093061	390	154	27092826	51	397.19	32.6
chr13	27880567	27881024	458	233	27880800	23	111.97	12.54
chr13	28190883	28191489	607	318	28191201	74	542.38	37.82
chr13	29937848	29938464	617	316	29938164	91	958.66	101.98
chr13	30633948	30634590	643	321	30634269	46	198.58	17.42
chr13	36471413	36471649	237	105	36471518	14	105.26	19.76
chr13	40138560	40139162	603	275	40138835	54	533.77	79.07
chr13	41743712	41744209	498	235	41743947	21	99.99	13.08
chr13	43613914	43614293	380	241	43614155	34	316.28	53.87
chr13	43907393	43907688	296	150	43907543	17	92.23	13.86
chr13	44461516	44461856	341	145	44461661	37	265.11	30.65
chr13	48915882	48916483	602	329	48916211	81	480.11	30.19
chr13	49596467	49596757	291	180	49596647	18	97.47	12.07
chr13	50925011	50925431	421	238	50925249	22	121.1	18.77
chr13	51484134	51484814	681	316	51484450	107	864.3	54.56
chr13	51927154	51927874	721	397	51927551	81	567.04	47.37
chr13	59635828	59636495	668	314	59636142	113	801.21	44.37
chr13	59868384	59868817	434	126	59868510	38	175.53	16.33
chr13	63547845	63548448	604	366	63548211	70	643.98	71.43
chr13	66702353	66702700	348	220	66702573	20	140.32	25.84
chr13	72199609	72200368	760	372	72199981	108	932.7	55.73
chr13	72253867	72254421	555	285	72254152	42	228.9	19.36
chr13	72530612	72531362	751	445	72531057	119	1136.48	95.17
chr13	90797238	90798183	946	659	90797897	77	112.99	6.85
chr13	94051624	94052316	693	378	94052002	110	961.41	75.84
chr13	95127004	95127495	492	310	95127314	45	320.15	36.78
chr13	96672178	96672795	618	307	96672485	42	183.78	22.88
chr13	100124892	100125588	697	357	100125249	113	1308.99	154.95
chr13	102046882	102047515	634	381	102047263	76	615.16	53
chr13	102248988	102249737	750	435	102249423	191	1935.19	114.24
chr13	105985756	105986409	654	328	105986084	87	961.98	114.94
chr13	107401421	107401734	314	233	107401654	19	100.34	15.79
chr13	107406879	107407643	765	520	107407399	60	110.04	8.2
chr13	109236795	109237321	527	248	109237043	52	355.41	38.18
chr13	110065564	110065983	420	235	110065799	65	734.64	72.45
chr13	110163073	110163873	801	464	110163537	123	1022.32	79.66
chr13	110165473	110166423	951	360	110165833	193	2049.53	81.02
chr13	112321932	112322367	436	294	112322226	21	174.15	32.32
chr14	19871133	19871584	452	211	19871344	51	334.08	34.23
chr14	19992855	19993387	533	287	19993142	45	272.75	30.65
chr14	19999251	20000247	997	611	19999862	206	1675.43	44.58
chr14	20527463	20528308	846	439	20527902	184	2009.06	151.75
chr14	20807137	20808158	1022	468	20807605	433	3100	170.32
chr14	20846618	20846906	289	195	20846813	13	105.94	27.11
chr14	20974762	20975764	1003	566	20975328	167	1275.09	75.23
chr14	20993848	20994412	565	363	20994211	66	491.8	39.34
chr14	21014972	21015391	420	218	21015190	26	167.07	24.43
chr14	22458062	22458772	711	328	22458390	113	723.73	32.86
chr14	22468319	22468911	593	242	22468561	118	877.76	29.85
chr14	22545769	22546745	977	505	22546274	166	946.13	34.83
chr14	22693139	22693699	561	335	22693474	36	114.27	7.49
chr14	22824925	22825877	953	395	22825320	229	1926.31	71.38
chr14	22859606	22860769	1164	815	22860421	330	3100	110.84
chr14	23008049	23008925	877	389	23008438	204	1724.47	56.17
chr14	23634597	23635036	440	202	23634799	39	230.17	19.23
chr14	23653386	23654677	1292	765	23654151	266	2297.98	52.54
chr14	23680410	23681500	1091	394	23680804	163	1294.57	55.73
chr14	23686137	23686623	487	271	23686408	25	132.75	20.94
chr14	23752378	23752786	409	233	23752611	57	379.4	29.42
chr14	23781423	23782018	596	334	23781757	48	227.61	22.29
chr14	23906723	23907223	501	260	23906983	24	124.12	16.72
chr14	23928224	23928746	523	257	23928481	25	161.73	28.42
chr14	30768661	30769239	579	301	30768962	40	179.59	15.64
chr14	34915508	34915872	365	209	34915717	22	129.09	21.18
chr14	35364901	35365482	582	377	35365278	59	382.89	29.19
chr14	35859442	35860025	584	287	35859729	57	325.23	33.05
chr14	36200551	36200999	449	213	36200764	34	182.05	22.57
chr14	38713667	38714404	738	407	38714074	159	1435.42	73.21
chr14	44673200	44673874	675	325	44673525	83	696.32	44.18
chr14	44674455	44675118	664	351	44674806	97	756.76	59.83
chr14	44792016	44792444	429	248	44792264	39	302.13	36.01
chr14	49156799	49157520	722	344	49157143	103	678.15	42.13
chr14	49848478	49848970	493	274	49848752	22	115.42	20.58
chr14	51525544	51526274	731	394	51525938	81	622.46	43.47
chr14	52088842	52089540	699	367	52089209	162	1632.32	89.49
chr14	53932992	53933723	732	344	53933336	123	1218.18	96.45
chr14	54291089	54291534	446	319	54291408	50	262.26	18.93
chr14	54727763	54728436	674	366	54728129	146	1653.71	153.53
chr14	54728705	54729014	310	204	54728909	14	108.24	20.9
chr14	55465618	55465969	352	249	55465867	13	100.26	22.37
chr14	56528712	56529141	430	210	56528922	17	127.79	31.15
chr14	57707528	57708019	492	239	57707767	23	131.34	20.9
chr14	57781066	57781659	594	209	57781275	78	469.36	32.2
chr14	57834287	57835252	966	603	57834890	356	3100	145.24
chr14	59784273	59784894	622	312	59784585	63	405.92	44.88
chr14	61095942	61096476	535	384	61096326	36	168.78	16.72
chr14	61231547	61232046	500	208	61231755	41	213.38	20.52
chr14	63079556	63080333	778	335	63079891	191	2014.67	103.45
chr14	63177840	63179193	1354	567	63178407	256	2174.19	48.48
chr14	63874987	63875668	682	317	63875304	82	705.76	54.01
chr14	63924273	63924891	619	303	63924576	60	336	23.65
chr14	64001744	64002086	343	182	64001926	17	100	12.86
chr14	64948008	64948616	609	282	64948290	42	290.06	37.62
chr14	67231207	67231574	368	132	67231339	37	296.38	29.53
chr14	67352903	67353339	437	271	67353174	24	101.44	8.12
chr14	67355967	67356700	734	224	67356191	160	2025.71	220.99
chr14	68515549	68516234	686	332	68515881	113	1256.55	114.94
chr14	70345965	70346572	608	363	70346328	44	396.99	59.71
chr14	71705952	71706368	417	251	71706203	17	132.64	32.32
chr14	72362500	72362963	464	217	72362717	17	95.94	21.31
chr14	72430383	72430833	451	297	72430680	34	263.21	39.52
chr14	72462580	72463265	686	317	72462897	111	785.09	47.48
chr14	72563470	72563909	440	181	72563651	18	103.12	15.2
chr14	72570613	72570901	289	104	72570717	13	111.34	29.83
chr14	72994916	72995670	755	297	72995213	246	2881.27	108.67
chr14	73486369	73487012	644	333	73486702	47	247.39	24.64
chr14	73620792	73621526	735	234	73621026	202	2720.72	159.75
chr14	74029784	74030411	628	315	74030099	71	619.7	54.34
chr14	74539003	74539518	516	253	74539256	53	316.82	22.04
chr14	74600133	74600887	755	424	74600557	168	1389.39	59.13
chr14	74713219	74713699	481	210	74713429	26	97.25	13.89
chr14	74795463	74796040	578	255	74795718	46	164.19	12.71
chr14	75196739	75197347	609	324	75197063	119	1016.36	58.91
chr14	75794040	75794547	508	273	75794313	41	242.9	26.94
chr14	76416470	76416991	522	301	76416771	32	269.6	45.82
chr14	76430363	76430747	385	278	76430641	25	207.41	30.04
chr14	76684654	76685029	376	118	76684772	16	90.42	16.72
chr14	76856343	76856746	404	148	76856491	18	109.3	15.2
chr14	76993649	76994080	432	146	76993795	21	91.65	11.15
chr14	77152640	77153496	857	400	77153040	246	2816.36	118.14
chr14	80972446	80972835	390	214	80972660	27	216.62	34.12
chr14	81069716	81070461	746	444	81070160	170	1801.35	103.18
chr14	88549099	88549622	524	299	88549398	33	275.14	45.98
chr14	88952005	88952565	561	279	88952284	39	337.41	50.16
chr14	89490588	89491241	654	321	89490909	104	823.98	40.12
chr14	89919170	89919709	540	259	89919429	128	1220.12	50.99
chr14	89981074	89981443	370	260	89981334	15	107.83	20.9
chr14	89990360	89990911	552	255	89990615	100	981.13	89.98
chr14	90026068	90026623	556	299	90026367	34	262.11	44.62
chr14	90345132	90345602	471	352	90345484	32	164.6	16.62
chr14	90363976	90364622	647	343	90364319	38	284.09	37.15
chr14	90596490	90597522	1033	648	90597138	260	2498.53	84.71
chr14	91642607	91643045	439	247	91642854	18	134.6	30.19
chr14	91794960	91795336	377	235	91795195	18	108	19.5
chr14	92120383	92120717	335	112	92120495	13	93.39	20.9
chr14	92559081	92559638	558	300	92559381	37	306.34	49.76
chr14	93074579	93074903	325	109	93074688	14	115.83	27.35
chr14	93219258	93219688	431	250	93219508	16	98.2	19.82
chr14	93561965	93562653	689	435	93562400	179	1886.79	119
chr14	93617043	93617605	563	318	93617361	47	236.5	23.89
chr14	94693361	94694161	801	352	94693713	83	637.93	51.35
chr14	95070536	95071325	790	451	95070987	251	2832.41	111.13
chr14	95181744	95182065	322	160	95181904	12	92.31	16.72
chr14	95369615	95369954	340	144	95369759	15	113.18	22.99
chr14	95716188	95716514	327	105	95716293	17	150.32	34.8
chr14	96199537	96200130	594	298	96199835	58	447.56	48.41
chr14	96298736	96299216	481	193	96298929	57	384.49	26.54
chr14	96333165	96333722	558	279	96333444	61	426.69	41.05
chr14	98896871	98897517	647	389	98897260	88	830.25	71.05
chr14	99016894	99017701	808	287	99017181	113	900.2	55.96
chr14	99140221	99140833	613	271	99140492	74	639.24	58.93
chr14	99728903	99729452	550	259	99729162	40	154.83	13.73
chr14	99774593	99775004	412	252	99774845	36	284.84	28.93
chr14	99912207	99912818	612	261	99912468	79	548.73	36.62
chr14	99982664	99983028	365	163	99982827	21	114.74	16.72
chr14	100157848	100158325	478	274	100158122	42	282.34	26.12
chr14	101120606	101121023	418	258	101120864	23	200.74	34.42
chr14	101345684	101346160	477	179	101345863	29	180.34	21.53
chr14	101393313	101393742	430	159	101393472	21	125.07	16.72
chr14	101484015	101484688	674	363	101484378	90	464.01	24.59
chr14	101700548	101700790	243	113	101700661	13	121.21	24.86
chr14	102060554	102061248	695	339	102060893	128	1113.02	65.99
chr14	102128382	102128847	466	270	102128652	34	241.87	31.01
chr14	102293284	102293739	456	204	102293488	32	282.01	41.8
chr14	102869982	102870654	673	268	102870250	105	845.55	55.43
chr14	102921309	102921652	344	113	102921422	29	241.06	39.52
chr14	103058871	103059205	335	145	103059016	16	97.88	16.72
chr14	103251314	103252163	850	314	103251628	211	2417.85	126.03
chr14	103398551	103398942	392	218	103398769	15	115.17	29.83
chr14	104242802	104243120	319	155	104242957	13	94.72	20.39
chr14	104288040	104288461	422	187	104288227	19	137.19	32.23
chr14	104289800	104290756	957	708	104290508	120	1069.45	65.48
chr14	104515579	104515927	349	240	104515819	16	94.15	20.56
chr14	105028165	105028978	814	286	105028451	229	2604.2	117.03
chr15	19410121	19410615	495	160	19410281	50	305.88	23.88
chr15	25632585	25633141	557	345	25632930	24	149.58	17.29
chr15	27510187	27510493	307	177	27510364	13	91.71	16.72
chr15	27747482	27747907	426	183	27747665	18	93.53	14.15
chr15	28870764	28871086	323	232	28870996	12	94.22	17.4
chr15	29350345	29350640	296	155	29350500	14	92.18	15.2
chr15	29405813	29406265	453	295	29406108	38	224.18	23.76
chr15	31274119	31274811	693	234	31274353	110	864.81	48.83
chr15	32181132	32181840	709	327	32181459	90	427.39	25.54
chr15	33086869	33087178	310	211	33087080	19	149.53	24.19
chr15	33246210	33246566	357	148	33246358	25	166.3	17.91
chr15	35031290	35031832	543	267	35031557	29	109.51	11.4
chr15	36676762	36677081	320	111	36676873	19	109.56	16.05
chr15	38118511	38119001	491	183	38118694	33	182.77	23.6
chr15	38188314	38188702	389	131	38188445	24	94.64	11.37
chr15	38519712	38520668	957	649	38520361	77	483.6	35.53
chr15	38644275	38644855	581	301	38644576	88	517.54	22.99
chr15	38648484	38649038	555	296	38648780	48	231.49	19.88
chr15	38843253	38843755	503	241	38843494	26	113.59	13.77
chr15	39032518	39033089	572	313	39032831	50	236.71	19.93
chr15	39309960	39310939	980	694	39310654	86	426.21	21.81
chr15	39338594	39338992	399	216	39338810	20	136.69	18.34
chr15	39363149	39363833	685	240	39363389	220	2159.02	90.27
chr15	39411846	39412592	747	462	39412308	112	635.18	26.85
chr15	39623581	39623943	363	258	39623839	20	92.25	13.87
chr15	40051868	40052493	626	278	40052146	96	631.76	40.25
chr15	40481057	40481391	335	228	40481285	17	92.23	11.2
chr15	40574800	40575310	511	263	40575063	39	174.38	19.39
chr15	40654568	40655281	714	348	40654916	41	231.19	16.72
chr15	40999914	41000848	935	483	41000397	252	2110.54	87.05
chr15	41572297	41573181	885	422	41572719	130	875.82	47.37
chr15	41871446	41871937	492	246	41871692	27	101.32	10.18
chr15	42274640	42275198	559	274	42274914	32	173.37	20.06
chr15	42790526	42791287	762	410	42790936	105	581.44	33.44
chr15	42808093	42808790	698	295	42808388	61	286.64	17.5
chr15	43035832	43036387	556	255	43036087	27	104.07	12.68
chr15	43358407	43359186	780	366	43358773	130	1069.98	56.51
chr15	43481339	43482129	791	427	43481766	152	1136.64	59.16
chr15	46890313	46891500	1188	305	46890618	243	1730.68	54.06
chr15	50731272	50731883	612	328	50731600	56	342.62	33.44
chr15	53399461	53399934	474	163	53399624	33	205.74	22.64
chr15	54123061	54123452	392	245	54123306	15	104.2	25.08
chr15	54544336	54545075	740	356	54544692	160	1424.97	81.2
chr15	54966409	54966979	571	277	54966686	71	484.65	34.23
chr15	55785916	55786219	304	175	55786091	18	120.21	15.92
chr15	56411310	56412129	820	309	56411619	84	351.39	23.11
chr15	56828960	56829691	732	482	56829442	38	95.54	7.24
chr15	57184194	57185018	825	404	57184598	121	719.04	28.98
chr15	61184611	61184872	262	176	61184787	13	94.63	15.05
chr15	61188964	61189682	719	346	61189310	61	288.02	17.42
chr15	61263612	61264014	403	134	61263746	21	113.01	14.69
chr15	61268393	61268981	589	282	61268675	57	358.86	37.84
chr15	62118186	62118628	443	165	62118351	38	281.08	31.19
chr15	62173024	62173486	463	218	62173242	40	151.69	12.78
chr15	62242079	62242973	895	390	62242469	72	281.84	17.84
chr15	62435267	62435764	498	182	62435449	36	159.92	13.88
chr15	62460240	62461390	1151	572	62460812	277	2242.22	77.62
chr15	62518217	62518763	547	305	62518522	29	141.73	16.72
chr15	62904670	62905305	636	306	62904976	101	844.07	61.3
chr15	62973024	62973788	765	421	62973445	87	574.95	35.94
chr15	63128596	63129266	671	308	63128904	108	991.51	71.8
chr15	63271535	63271939	405	109	63271644	19	149.53	31.6
chr15	63379761	63380223	463	257	63380018	20	118.54	20.12
chr15	63690455	63690951	497	201	63690656	31	138.84	15.92
chr15	63871444	63872024	581	270	63871714	33	90.83	10.79
chr15	63884474	63885012	539	234	63884708	29	120.29	14.21
chr15	64099318	64099861	544	268	64099586	31	128.49	18.31
chr15	64465864	64466342	479	299	64466163	29	139.84	18.69
chr15	65325838	65326100	263	119	65325957	18	171.95	36.15
chr15	66298492	66298895	404	109	66298601	22	139.85	22.29
chr15	66899897	66900689	793	481	66900378	132	1283.41	76.11
chr15	67239421	67240129	709	431	67239852	96	740.62	46.44
chr15	67493364	67493878	515	316	67493680	44	224.92	23.68
chr15	67531836	67532447	612	300	67532136	49	208.58	23.15
chr15	67604817	67605436	620	326	67605143	54	376.52	51.83
chr15	67902432	67903006	575	280	67902712	29	168.11	23.35
chr15	67989094	67989452	359	195	67989289	17	102.36	13.93
chr15	68177143	68177692	550	204	68177347	87	605.91	38.09
chr15	68178795	68179470	676	318	68179113	88	643.02	48.68
chr15	68842828	68843233	406	182	68843010	17	131.68	19.11
chr15	70310402	70311030	629	358	70310760	41	200.41	13.2
chr15	70351866	70352392	527	216	70352082	30	90.68	11.53
chr15	71836436	71836733	298	197	71836633	16	98.2	16.19
chr15	72053882	72054079	198	100	72053982	19	234.63	47.23
chr15	72355295	72355662	368	201	72355496	47	417.55	50.45
chr15	72452956	72454254	1299	928	72453884	92	332.68	19.7
chr15	72468784	72469380	597	313	72469097	40	95.77	8.36
chr15	72620147	72620533	387	248	72620395	35	198.11	18.24
chr15	72625361	72625992	632	263	72625624	31	98.62	8.45
chr15	72677544	72678217	674	308	72677852	106	687.74	36.18
chr15	72952125	72952966	842	374	72952499	122	673.9	35.46
chr15	73102776	73103197	422	179	73102955	33	175.09	19.11
chr15	73232531	73233040	510	209	73232740	64	512.26	39.71
chr15	73277997	73278618	622	282	73278279	52	334.43	19.85
chr15	73319039	73319374	336	221	73319260	21	158.64	24.11
chr15	73530793	73531809	1017	534	73531327	448	3100	78.55
chr15	73533220	73533966	747	435	73533655	116	797.01	40.1
chr15	73534974	73535528	555	264	73535238	33	107.11	14.33
chr15	73719373	73719984	612	318	73719691	75	421.21	29.85
chr15	74390752	74391216	465	158	74390910	37	227.34	22.62
chr15	74415711	74416207	497	259	74415970	55	291.1	19.59
chr15	75010609	75011365	757	419	75011028	106	784.41	46.81
chr15	75150324	75150839	516	284	75150608	41	215.75	23.88
chr15	75615296	75615722	427	185	75615481	20	122.12	19.41
chr15	75679160	75679821	662	295	75679455	69	387.02	29.26
chr15	75915768	75916164	397	212	75915980	20	116.01	15.43
chr15	76228394	76228747	354	247	76228641	20	99.45	14.86
chr15	76586406	76587251	846	473	76586879	110	665.38	26.36
chr15	76951940	76952593	654	276	76952216	95	553.33	39.37
chr15	77593256	77593722	467	275	77593531	21	99.99	12.27
chr15	77988873	77989291	419	178	77989051	28	229.74	35.29
chr15	78151626	78152331	706	270	78151896	111	910.32	39.95
chr15	78920957	78921340	384	161	78921118	34	328.23	40.78
chr15	79077585	79078156	572	268	79077853	37	138.71	18.65
chr15	79097655	79097930	276	103	79097758	14	96.26	16.72
chr15	79403399	79404035	637	291	79403690	126	988.33	49.92
chr15	80021394	80022062	669	283	80021677	36	112.37	8.36
chr15	80125472	80125883	412	141	80125613	25	121.97	16.72
chr15	81274759	81275600	842	543	81275302	284	3100	132.11
chr15	81638633	81639084	452	245	81638878	17	99.07	20.06
chr15	81906844	81907353	510	212	81907056	36	213.25	30.3
chr15	82944928	82945486	559	271	82945199	86	544.85	34.01
chr15	82975345	82976044	700	259	82975604	192	1610.68	55.73
chr15	83060121	83060785	665	552	83060673	43	140.94	12.54
chr15	83724460	83725006	547	233	83724693	43	284.87	35.44
chr15	84139017	84139552	536	212	84139229	105	872.99	63.47
chr15	86965181	86965844	664	315	86965496	93	540.79	31.21
chr15	87414296	87414753	458	198	87414494	23	111.97	12.54
chr15	87432065	87432948	884	475	87432540	294	3100	122.78
chr15	87678876	87679437	562	280	87679156	63	331.24	25.25
chr15	87801258	87801825	568	296	87801554	34	134.84	14.61
chr15	87806644	87807197	554	284	87806928	28	202.81	40.72
chr15	87919273	87920068	796	384	87919657	209	1784.01	62.91
chr15	88431878	88432324	447	285	88432163	33	173.12	21.59
chr15	88664235	88664489	255	145	88664380	14	95.8	15.33
chr15	88695980	88696839	860	420	88696400	218	2310.2	126.43
chr15	89061170	89061854	685	419	89061589	102	657.94	24.77
chr15	89185237	89185723	487	275	89185512	25	90.58	8.88
chr15	89298807	89299816	1010	713	89299520	103	428.52	18.74
chr15	89338488	89339234	747	349	89338837	80	420.24	25.6
chr15	89635744	89636321	578	346	89636090	101	994.91	74.89
chr15	89822852	89823214	363	143	89822995	19	98.32	11.49
chr15	91175925	91176540	616	299	91176224	29	109.04	12.87
chr15	91226010	91227107	1098	679	91226689	228	1925.27	89.67
chr15	91248240	91248887	648	305	91248545	63	303.06	16.85
chr15	94054209	94054713	505	252	94054461	25	90.58	14.58
chr15	94479966	94480298	333	111	94480077	17	144	30.19
chr15	94617822	94618456	635	347	94618169	36	101.78	7.26
chr15	94674697	94675060	364	107	94674804	21	111.44	13.01
chr15	94859137	94859440	304	106	94859243	19	166.52	33.44
chr15	96220138	96220649	512	227	96220365	33	227.62	24.5
chr15	96304094	96305367	1274	641	96304735	403	3100	124.07
chr15	97213098	97213454	357	106	97213204	16	111.93	20.21
chr15	97608596	97609330	735	448	97609044	82	510.92	42.99
chr15	98959837	98960563	727	403	98960240	59	309.36	24.24
chr16	42940	44028	1089	740	43680	204	1441.8	55.83
chr16	268883	269424	542	234	269117	51	365.96	35.67
chr16	360359	360895	537	231	360590	108	991.51	71.82
chr16	579021	580326	1306	839	579860	305	2519.65	45.6
chr16	674233	674635	403	137	674370	32	184.75	16.72
chr16	704755	705237	483	291	705046	30	181.44	23.88
chr16	778232	778906	675	311	778543	40	204.82	16.41
chr16	1298758	1299674	917	338	1299096	212	2074.8	100.31
chr16	1332782	1333672	891	531	1333313	84	425.38	18.96
chr16	1398131	1398501	371	180	1398311	28	147.33	15.13
chr16	1601781	1602477	697	269	1602050	77	548.73	40.78
chr16	1667760	1668587	828	453	1668213	166	1527.21	74.75
chr16	1772336	1773233	898	533	1772869	397	3100	102.7
chr16	1816582	1817433	852	310	1816892	107	573.97	23.41
chr16	1933175	1933655	481	192	1933367	25	99.13	10.45
chr16	1954643	1955223	581	274	1954917	131	1250.75	76.82
chr16	2145196	2145931	736	255	2145451	200	1714.19	44.15
chr16	2204556	2205516	961	404	2204960	337	3100	116.3
chr16	2418935	2419602	668	287	2419222	106	856.19	55.73
chr16	2510066	2510459	394	98	2510164	18	102.44	13.48
chr16	2872424	2873346	923	367	2872791	116	658.57	34.06
chr16	2895146	2896336	1191	742	2895888	184	1536.96	61.73
chr16	2901585	2901983	399	298	2901883	31	143.81	14.68
chr16	2993775	2994409	635	298	2994073	199	2267.29	105.12
chr16	3124532	3125169	638	376	3124908	113	943.27	65.2
chr16	3225012	3225553	542	145	3225157	37	189.08	14.96
chr16	3254074	3255050	977	591	3254665	154	942.73	42.35
chr16	3272886	3273687	802	508	3273394	85	375.22	19.25
chr16	3390835	3391477	643	280	3391115	138	1034.76	51.49
chr16	3433321	3433882	562	279	3433600	39	185.95	19.9
chr16	3447843	3448169	327	221	3448064	19	93.35	10.56
chr16	4037550	4037897	348	101	4037651	19	109.56	18.62
chr16	4256217	4256905	689	336	4256553	117	1165.2	90.02
chr16	4406380	4406945	566	359	4406739	44	197.57	14.71
chr16	4464440	4464928	489	197	4464637	26	99.32	9.12
chr16	4605994	4606825	832	372	4606366	146	1050.05	59.8
chr16	4683231	4683923	693	320	4683551	93	714.8	39.01
chr16	4724194	4724675	482	234	4724428	91	719.9	39.71
chr16	4756960	4757416	457	266	4757226	47	284.39	24.45
chr16	4792558	4793235	678	413	4792971	171	1753.32	80.29
chr16	4837111	4837694	584	299	4837410	65	512.32	38.93
chr16	4884782	4885242	461	181	4884963	30	152.95	19.27
chr16	5005387	5005712	326	155	5005542	19	135.33	19.76
chr16	5210732	5211140	409	195	5210927	23	197.28	32.51
chr16	6677613	6677968	356	191	6677804	17	107.49	17.86
chr16	7045442	7045921	480	208	7045650	26	210.32	37.4
chr16	8098778	8099381	604	289	8099067	46	347.29	41.8
chr16	8378604	8379037	434	277	8378881	25	210.88	31.21
chr16	8501381	8501907	527	269	8501650	23	116.02	12.59
chr16	8595688	8595946	259	149	8595837	13	115.28	26.27
chr16	8675630	8676197	568	282	8675912	26	153.01	30.4
chr16	8998208	8998788	581	290	8998498	43	264.63	30.22
chr16	9054436	9054891	456	170	9054606	32	120.85	11.73
chr16	9092369	9093155	787	470	9092839	164	1201.7	62.93
chr16	9141197	9141716	520	252	9141449	39	183.51	21.01
chr16	10386939	10387646	708	422	10387361	125	1083.33	67.38
chr16	10554504	10555151	648	241	10554745	68	511.02	46.81
chr16	10943610	10944232	623	271	10943881	44	231.73	25.3
chr16	11209020	11209475	456	217	11209237	22	115.76	21.5
chr16	11239669	11240414	746	383	11240052	78	274.55	13.14
chr16	11346325	11347038	714	401	11346726	124	1076.62	79.88
chr16	11798452	11799112	661	313	11798765	108	926.54	59.99
chr16	13136156	13136653	498	288	13136444	19	102.68	18.24
chr16	13561450	13561930	481	240	13561690	28	171.59	30.86
chr16	14322874	14323336	463	188	14323062	19	95.92	12.9
chr16	14336738	14337167	430	184	14336922	19	121.12	15.05
chr16	14635297	14635755	459	181	14635478	36	159.92	11.51
chr16	15095598	15095841	244	146	15095744	17	171.98	32.32
chr16	15534790	15535233	444	112	15534902	25	159.85	19.5
chr16	15651038	15651833	796	459	15651497	70	307.97	22.91
chr16	15776526	15776907	382	147	15776673	21	127.73	14.05
chr16	15889793	15890365	573	280	15890073	72	375.07	20.9
chr16	15909274	15910004	731	332	15909606	128	980.22	43.85
chr16	16050367	16051023	657	310	16050677	54	231.4	18.31
chr16	16145288	16145721	434	199	16145487	24	114.18	13
chr16	16892338	16892758	421	215	16892553	26	151.91	22.29
chr16	16983997	16984411	415	170	16984167	18	107.34	21.28
chr16	17102962	17103270	309	191	17103153	25	166.3	21.7
chr16	17229651	17230136	486	257	17229908	21	114.86	13.93
chr16	17963118	17963533	416	110	17963228	31	304.69	57.18
chr16	18720079	18720725	647	395	18720474	133	899.82	29.5
chr16	18986057	18986862	806	285	18986342	138	1097.3	45.97
chr16	19045166	19045449	284	138	19045304	17	127.79	18.99
chr16	19257084	19257632	549	265	19257349	23	147.77	31.58
chr16	19296741	19297063	323	104	19296845	19	109.56	14.04
chr16	19440698	19441124	427	254	19440952	28	142.95	15.84
chr16	19528234	19528548	315	106	19528340	20	140	23.3
chr16	20682243	20682650	408	211	20682454	26	108.21	11.84
chr16	20744974	20745558	585	307	20745281	32	167.72	17.83
chr16	20834469	20835115	647	335	20834804	54	244.89	21.22
chr16	21208569	21208774	206	104	21208673	16	178.37	39.77
chr16	21518016	21518533	518	239	21518255	32	121.29	14.04
chr16	21623478	21623819	342	237	21623715	19	107.62	16.72
chr16	21871613	21872279	667	242	21871855	46	127.79	10.22
chr16	22123344	22123905	562	190	22123534	30	147.96	13.57
chr16	22136826	22137221	396	186	22137012	30	125.41	12.64
chr16	22293157	22293880	724	367	22293524	226	2480.37	130.03
chr16	22589209	22589765	557	323	22589532	33	95.4	11.86
chr16	22840918	22841233	316	230	22841148	14	115.98	19.38
chr16	22938878	22939398	521	200	22939078	35	225.31	26.13
chr16	23146249	23146795	547	229	23146478	45	233.49	22.1
chr16	23438079	23438565	487	252	23438331	19	95.92	17.64
chr16	23475948	23476767	820	285	23476233	90	502.51	22.07
chr16	23597361	23597885	525	300	23597661	36	155.66	19.13
chr16	24069176	24069555	380	109	24069285	17	100.79	21.62
chr16	24245198	24245711	514	232	24245430	26	167.29	26.81
chr16	24802298	24802867	570	258	24802556	32	148.64	14.86
chr16	24950165	24950958	794	373	24950538	145	1284.91	65.95
chr16	25030097	25030878	782	411	25030508	190	1664.39	67.43
chr16	26310745	26311056	312	154	26310899	16	138.92	26.27
chr16	26706761	26707231	471	175	26706936	23	152.25	28.42
chr16	27002495	27003341	847	444	27002939	179	1701.01	83.08
chr16	27026176	27026522	347	181	27026357	25	195.1	29.14
chr16	27136015	27136446	432	179	27136194	25	133.98	16.72
chr16	27187447	27188009	563	186	27187633	105	998.53	67.98
chr16	27293920	27294439	520	192	27294112	40	276.28	31.05
chr16	27345833	27346111	279	169	27346002	14	95.63	18.24
chr16	27468660	27469242	583	246	27468906	65	362.53	27.65
chr16	27664082	27664584	503	274	27664356	22	107.91	21.62
chr16	27825763	27826044	282	126	27825889	28	195.23	22.29
chr16	27918530	27919014	485	194	27918724	30	212.41	30.96
chr16	27945952	27946346	395	143	27946095	34	215.46	22.64
chr16	28742476	28743145	670	298	28742774	88	553.65	36.11
chr16	28798496	28799224	729	329	28798825	66	392.2	24.38
chr16	28869338	28870132	795	378	28869716	257	3063.82	128.48
chr16	29564355	29564958	604	374	29564729	36	122.67	11.36
chr16	29594887	29595322	436	226	29595113	38	201.91	21.87
chr16	29729969	29730337	369	169	29730138	27	155.72	17.65
chr16	29796181	29796890	710	332	29796513	40	118.64	8.31
chr16	29802782	29803143	362	257	29803039	18	100.78	18.16
chr16	29818777	29819166	390	299	29819076	19	102.93	11.94
chr16	29940012	29940488	477	178	29940190	37	167.67	17.28
chr16	29955290	29955727	438	255	29955545	39	226.72	21.97
chr16	29984266	29984767	502	145	29984411	26	101.22	8.76
chr16	30289096	30290326	1231	514	30289610	489	3100	90.78
chr16	30326170	30326516	347	202	30326372	26	153.05	16.72
chr16	30348585	30349375	791	335	30348920	101	562.56	29.98
chr16	30364368	30365111	744	411	30364779	113	673.86	33.98
chr16	30445994	30446582	589	322	30446316	38	122.74	12.26
chr16	30490617	30491416	800	342	30490959	203	1597.62	50.16
chr16	30504264	30505108	845	374	30504638	192	1516.85	63.89
chr16	30528795	30529687	893	465	30529260	371	3100	120.74
chr16	30552856	30553715	860	401	30553257	181	1377.37	68.3
chr16	30569030	30570000	971	443	30569473	280	2653.59	103.1
chr16	30576738	30577588	851	358	30577096	120	710.73	29.98
chr16	30666768	30667385	618	330	30667098	96	704.6	38
chr16	30680727	30681199	473	261	30680988	44	186.63	14.11
chr16	30697373	30697894	522	311	30697684	32	97.79	9.82
chr16	30815222	30815629	408	163	30815385	29	114.17	12.54
chr16	30841072	30841770	699	272	30841344	42	99.41	8.36
chr16	30866880	30867358	479	260	30867140	56	374.13	32.83
chr16	30876173	30876681	509	283	30876456	25	107.16	13
chr16	31013461	31013879	419	213	31013674	55	426.85	31.58
chr16	31036220	31036594	375	98	31036318	33	173.12	12.54
chr16	31323476	31323628	153	77	31323553	14	185.69	23.41
chr16	31391597	31392089	493	240	31391837	27	150.13	22.37
chr16	31618993	31619806	814	395	31619388	122	921.51	56.01
chr16	31631638	31632452	815	395	31632033	92	664.06	44.25
chr16	31792247	31792856	610	311	31792558	95	961.93	95.12
chr16	45212515	45213152	638	310	45212825	56	434.91	51.55
chr16	45280306	45281307	1002	432	45280738	239	1929.42	58.51
chr16	45422694	45423272	579	254	45422948	37	195.52	23.6
chr16	47484409	47484785	377	106	47484515	21	127.73	21.43
chr16	47873214	47873623	410	199	47873413	17	121.43	20.9
chr16	48045358	48045807	450	267	48045625	20	100.33	13.14
chr16	48075763	48076187	425	206	48075969	23	171.98	27.86
chr16	48159263	48159893	631	356	48159619	41	312.65	35.16
chr16	48509592	48510074	483	253	48509845	20	123.78	18.96
chr16	48515311	48515968	658	354	48515665	58	397.99	36.78
chr16	48616168	48616939	772	352	48616520	186	1601.51	80.25
chr16	48973759	48974194	436	287	48974046	23	122.09	13.37
chr16	49332886	49333745	860	479	49333365	211	2341.14	105.09
chr16	49451397	49451827	431	153	49451550	21	159.81	29.26
chr16	51721757	51722555	799	553	51722310	106	948.59	56.59
chr16	51799545	51800099	555	292	51799837	57	293.74	23.51
chr16	52026661	52027317	657	347	52027008	111	841.98	54.52
chr16	52094491	52095255	765	454	52094945	151	1090.34	36.9
chr16	52173108	52173485	378	255	52173363	18	102.03	15.43
chr16	52337451	52337831	381	142	52337593	16	127.95	27.35
chr16	52792582	52793122	541	277	52792859	26	174.57	21.34
chr16	52833605	52834052	448	230	52833835	20	136.69	29.96
chr16	52862228	52862580	353	148	52862376	15	103.38	18.58
chr16	53029323	53029668	346	241	53029564	31	323.88	57.32
chr16	53520366	53520904	539	306	53520672	50	325.52	32.23
chr16	54794665	54794992	328	80	54794745	26	211.52	33.44
chr16	55005776	55006217	442	208	55005984	20	104.12	12.32
chr16	55042441	55043192	752	422	55042863	176	1350.4	49.74
chr16	55318387	55318697	311	169	55318556	29	257.93	37.85
chr16	55321261	55321845	585	295	55321556	35	109.03	10.93
chr16	55523081	55523679	599	381	55523462	102	669.62	32.88
chr16	55777193	55777896	704	372	55777565	132	1052.93	53.79
chr16	55836244	55836601	358	169	55836413	29	144.97	11.84
chr16	56127099	56127837	739	424	56127523	98	799.56	64.55
chr16	56281322	56281840	519	245	56281567	32	141.41	16.72
chr16	56326193	56327430	1238	572	56326765	559	3100	69.49
chr16	56720571	56721293	723	309	56720880	123	1057.64	52.94
chr16	56827619	56828318	700	382	56828001	64	267.03	18.88
chr16	57091175	57091673	499	264	57091439	35	253.54	37.8
chr16	57220906	57222101	1196	484	57221390	366	3100	80.01
chr16	65471466	65472332	867	413	65471879	224	1708.87	62.98
chr16	65538649	65539000	352	228	65538877	17	109.75	15.2
chr16	65609211	65609794	584	275	65609486	40	158.61	12.37
chr16	65752128	65752699	572	330	65752458	38	211.34	25.49
chr16	65774646	65775421	776	461	65775107	193	1673.42	66.21
chr16	65838780	65839312	533	263	65839043	34	125.81	14.64
chr16	66251697	66252392	696	414	66252111	39	113.43	6.74
chr16	66397744	66398478	735	299	66398043	71	376.84	22.99
chr16	66484405	66484811	407	130	66484535	29	192.01	25.08
chr16	66836428	66837074	647	224	66836652	84	550.74	31.01
chr16	66972681	66973297	617	281	66972962	56	363.42	32.45
chr16	67998235	67998807	573	265	67998500	51	369.31	38.32
chr16	68015445	68016401	957	499	68015944	198	1432.82	40.12
chr16	68020680	68021184	505	241	68020921	29	195	28.88
chr16	68114003	68114593	591	346	68114349	38	201.27	22.99
chr16	68457058	68457584	527	250	68457308	29	128.34	16.74
chr16	68880572	68881483	912	438	68881010	227	1942.61	82.31
chr16	69821864	69822365	502	294	69822158	37	295.77	40.12
chr16	70599627	70600467	841	475	70600102	85	412.18	22.09
chr16	70684801	70685624	824	409	70685210	139	937.47	44.18
chr16	71256247	71256700	454	196	71256443	107	927.53	42.49
chr16	73156689	73157141	453	275	73156964	42	314.35	37.02
chr16	73257964	73258688	725	460	73258424	259	3191.9	163.08
chr16	73287077	73287815	739	344	73287421	133	899.82	49.42
chr16	73576274	73576880	607	307	73576581	79	411.43	22.83
chr16	74055827	74056513	687	363	74056190	77	425.1	24.25
chr16	74108452	74109133	682	366	74108818	134	1118.86	55.49
chr16	74146500	74147011	512	247	74146747	23	94.24	10.46
chr16	75781725	75782768	1044	429	75782154	255	2159.22	56.59
chr16	76248276	76248857	582	256	76248532	69	463.47	29.19
chr16	76594281	76594732	452	322	76594603	36	171.65	17.17
chr16	76690446	76691058	613	296	76690742	49	216	18
chr16	77387428	77388127	700	424	77387852	88	771.94	73.3
chr16	78361684	78362899	1216	477	78362161	123	683.28	38.06
chr16	78437137	78437674	538	237	78437374	38	127.78	12.17
chr16	79687354	79688021	668	230	79687584	98	607.03	25.27
chr16	79823861	79824350	490	162	79824023	41	312.65	36.86
chr16	79905674	79906223	550	270	79905944	40	160.07	13
chr16	82454725	82455151	427	230	82454955	21	112.51	14.28
chr16	82489788	82490480	693	410	82490198	64	351.97	28.12
chr16	82781791	82782528	738	430	82782221	106	911.87	60.1
chr16	82834798	82835407	610	302	82835100	44	230.78	21.12
chr16	82857434	82858029	596	254	82857688	176	1488.04	56.64
chr16	82871971	82872749	779	399	82872370	165	1728.4	114.85
chr16	83014407	83015109	703	459	83014866	76	345.45	20.44
chr16	83095391	83096231	841	448	83095839	157	1035.79	45.98
chr16	83128131	83128919	789	187	83128318	80	396.76	27.01
chr16	83176764	83177481	718	379	83177143	55	247.93	17.42
chr16	83201426	83201951	526	267	83201693	38	146.73	16.33
chr16	83208969	83209482	514	365	83209334	99	874.13	56.59
chr16	83404635	83405100	466	274	83404909	28	131.86	12.98
chr16	83543353	83544244	892	558	83543911	51	93.5	6.43
chr16	84279908	84280426	519	250	84280158	54	408.39	41.24
chr16	84324722	84325388	667	404	84325126	40	175.76	13.37
chr16	84553262	84553789	528	234	84553496	35	175.87	19.36
chr16	84852425	84852908	484	251	84852676	26	131.17	21.94
chr16	85019814	85020223	410	183	85019997	20	154.26	25.4
chr16	85145115	85145335	221	111	85145226	32	304.5	38.77
chr16	85225449	85225817	369	154	85225603	17	92.23	14.81
chr16	85233127	85233673	547	238	85233365	29	209.49	36.7
chr16	85314805	85315301	497	205	85315010	35	225.31	34.42
chr16	85566399	85566977	579	250	85566649	85	609.92	48.4
chr16	85648599	85649138	540	273	85648872	26	126.69	20.06
chr16	85907976	85909144	1169	569	85908545	188	1471.12	80.28
chr16	85979136	85980068	933	467	85979603	187	1237.06	44.75
chr16	86083987	86084457	471	282	86084269	41	422.76	62.15
chr16	86248794	86249007	214	108	86248902	20	109.53	13.37
chr16	86530637	86531069	433	269	86530906	22	107.91	13.44
chr16	86541905	86542335	431	169	86542074	26	103	12.54
chr16	86912170	86913132	963	407	86912577	134	1263.87	79.41
chr16	87085391	87086021	631	323	87085714	36	102.21	8.36
chr16	87091626	87092128	503	235	87091861	25	98.59	13.37
chr16	87256658	87257417	760	485	87257143	222	1701	47.08
chr16	87392891	87393471	581	298	87393189	50	223.07	20.03
chr16	87586245	87586699	455	280	87586525	32	130.09	12.04
chr16	87765349	87765908	560	239	87765588	40	204.82	15.32
chr16	88084191	88085183	993	587	88084778	306	3100	99.33
chr16	88154251	88154792	542	251	88154502	38	175.53	18.88
chr16	88295678	88296349	672	295	88295973	42	206.78	20.43
chr16	88410337	88410873	537	271	88410608	43	264.63	31.92
chr16	88551771	88552450	680	345	88552116	50	354.42	30.65
chr16	88671079	88671590	512	201	88671280	104	1224.61	124.57
chr17	56024	56509	486	177	56201	26	222.35	32.32
chr17	962936	963145	210	106	963042	17	165.43	35.53
chr17	1313337	1313714	378	105	1313442	18	91.87	12.26
chr17	1366446	1367011	566	311	1366757	44	243.52	29.92
chr17	1478223	1479235	1013	242	1478465	85	574.41	37.56
chr17	1534703	1535279	577	237	1534940	97	792.24	44.3
chr17	1566107	1567952	1846	380	1566487	362	1990.64	43.16
chr17	1679850	1680208	359	126	1679976	23	153.11	24.43
chr17	2246748	2247313	566	289	2247037	34	185.99	19.54
chr17	2251430	2252062	633	324	2251754	42	252.88	24.38
chr17	2381352	2381681	330	226	2381578	12	93.11	22.37
chr17	2757017	2757310	294	186	2757203	14	119.48	28.66
chr17	2898721	2899359	639	369	2899090	60	552.9	46.44
chr17	3486043	3486721	679	413	3486456	43	258.23	25.72
chr17	3743059	3743448	390	152	3743211	30	220.28	26.54
chr17	4558543	4558759	217	109	4558652	15	136.97	29.85
chr17	4560100	4560595	496	315	4560415	27	119.37	9.68
chr17	4810829	4812068	1240	641	4811470	409	3100	108.23
chr17	5263464	5264238	775	314	5263778	71	426.67	28.16
chr17	5330136	5330861	726	390	5330526	74	545.4	36.78
chr17	5602683	5603193	511	299	5602982	48	393.66	42.72
chr17	6172281	6172712	432	217	6172498	15	106.98	26.48
chr17	6205886	6206132	247	101	6205987	16	145.02	30.97
chr17	6287767	6288561	795	590	6288357	46	213.17	12.78
chr17	6858596	6858955	360	111	6858707	39	330.57	34.72
chr17	7058326	7058831	506	268	7058594	30	167.74	26.75
chr17	7247598	7248681	1084	638	7248236	192	1929.11	99.02
chr17	7416226	7417033	808	493	7416719	234	2463.59	105.37
chr17	7459032	7459494	463	184	7459216	51	323.46	28.64
chr17	7471700	7472226	527	294	7471994	28	102.3	11.01
chr17	7679477	7679988	512	215	7679692	34	158.65	17.51
chr17	7688664	7689223	560	311	7688975	55	342.93	28.94
chr17	7695684	7696204	521	257	7695941	26	137.19	16.72
chr17	7849944	7850430	487	198	7850142	45	430.57	51.75
chr17	7996335	7996847	513	214	7996549	34	174.09	16.18
chr17	8000164	8001093	930	512	8000676	216	2117.61	77.09
chr17	8033977	8034633	657	337	8034314	97	829.59	56.42
chr17	8036124	8036802	679	241	8036365	56	299.93	22.7
chr17	8054355	8054928	574	345	8054700	92	786.92	65.26
chr17	8139193	8139772	580	238	8139431	42	221.75	18.48
chr17	8148463	8148980	518	283	8148746	23	143.38	26.75
chr17	8165031	8165589	559	231	8165262	59	447.67	37.9
chr17	8474516	8475391	876	501	8475017	196	1991.09	106.7
chr17	8561373	8561652	280	176	8561549	16	149.21	37.29
chr17	12861802	12862375	574	306	12862108	89	888.41	83.59
chr17	14144540	14145314	775	434	14144974	120	1147.95	72.02
chr17	14153189	14153784	596	327	14153516	43	290.42	34.72
chr17	15185458	15185970	513	260	15185718	37	354.12	64.63
chr17	15843599	15844029	431	181	15843780	20	130.57	23.41
chr17	16224750	16225121	372	261	16225011	17	128.37	18.81
chr17	16282507	16283189	683	235	16282742	49	274.97	23.6
chr17	16886006	16886496	491	362	16886368	82	902.81	103.26
chr17	17124541	17125173	633	267	17124808	56	429.18	41.8
chr17	17259969	17260518	550	319	17260288	30	166.05	15.52
chr17	17453215	17453619	405	160	17453375	17	92.23	17.6
chr17	17593929	17594489	561	227	17594156	51	256.55	20.1
chr17	17816119	17817197	1079	598	17816717	421	3100	133.75
chr17	17883093	17883634	542	270	17883363	84	806.06	70.93
chr17	18027111	18027759	649	373	18027484	127	911.46	33.12
chr17	18069260	18069730	471	312	18069572	54	596.89	88.24
chr17	18104072	18104913	842	544	18104616	111	845.31	52.55
chr17	18207450	18207905	456	167	18207617	40	236.04	20.33
chr17	18699937	18700562	626	368	18700305	50	301.24	23.6
chr17	19222018	19222526	509	344	19222362	32	154.09	15.79
chr17	20712111	20712560	450	310	20712421	37	374.79	79.55
chr17	20886876	20887562	687	408	20887284	58	387.93	32.32
chr17	20942808	20943643	836	285	20943093	56	272.96	15.84
chr17	20970597	20971063	467	196	20970793	42	274.73	31.23
chr17	21097190	21097534	345	199	21097389	18	93.76	15.67
chr17	21119552	21120047	496	227	21119779	28	152.35	17.83
chr17	21128240	21128860	621	314	21128554	51	429.73	62.29
chr17	21166794	21167373	580	245	21167039	114	704.72	35.26
chr17	21456321	21456736	416	144	21456465	33	331.71	74.58
chr17	21761460	21761792	333	144	21761604	34	335.26	51.96
chr17	21774026	21774296	271	166	21774192	14	126.88	27.35
chr17	22440264	22440847	584	151	22440415	70	525.57	39.05
chr17	22691129	22691574	446	128	22691257	27	102.75	12.04
chr17	22915462	22916047	586	331	22915793	39	210.67	21.55
chr17	22917788	22918269	482	248	22918036	24	104.71	11.15
chr17	23077223	23077493	271	107	23077330	12	103.38	27.35
chr17	23392071	23393158	1088	702	23392773	566	3100	107.28
chr17	23524121	23524753	633	332	23524453	40	176.28	13.53
chr17	23669880	23670683	804	293	23670173	147	959.1	35.53
chr17	23922405	23923017	613	301	23922706	52	291.66	28.42
chr17	23949964	23950453	490	189	23950153	51	180.85	12.48
chr17	24070713	24071498	786	341	24071054	101	461.53	29.92
chr17	24163185	24164198	1014	515	24163700	204	1389	56.42
chr17	24205638	24206404	767	492	24206130	106	392.34	15.78
chr17	24211349	24211903	555	256	24211605	50	209.72	16.72
chr17	24420731	24421237	507	282	24421013	32	120.85	11.08
chr17	24497510	24497985	476	215	24497725	41	124.62	11.14
chr17	24644979	24645649	671	342	24645321	129	1173.45	72.45
chr17	25729757	25730272	516	229	25729986	31	114.9	15.38
chr17	27082545	27082828	284	181	27082726	18	173.42	39.77
chr17	27082926	27083339	414	107	27083033	19	142.28	29.08
chr17	27153647	27154056	410	270	27153917	18	96.23	15.43
chr17	27183869	27184227	359	104	27183973	14	105.77	20.9
chr17	27493986	27494604	619	316	27494302	59	296.64	22.64
chr17	27795421	27795754	334	157	27795578	22	93.28	12.04
chr17	28145496	28146032	537	296	28145792	56	327.21	28.35
chr17	28930738	28931072	335	229	28930967	13	93.39	20.9
chr17	30312337	30312882	546	258	30312595	36	104.53	11.31
chr17	30397788	30398098	311	200	30397988	17	92.55	9.4
chr17	30593944	30594397	454	152	30594096	29	231.73	35.29
chr17	30918824	30919516	693	361	30919185	97	632.57	36.78
chr17	31160031	31160776	746	468	31160499	67	357.91	32.74
chr17	31916216	31916724	509	352	31916568	52	227.18	17.52
chr17	31975374	31975645	272	116	31975490	45	355.76	29.46
chr17	34008410	34008691	282	104	34008514	21	117.63	15.88
chr17	34038267	34038608	342	209	34038476	34	211.97	14.33
chr17	34128253	34128906	654	323	34128576	74	368.22	27.33
chr17	34162088	34162932	845	396	34162484	215	1734.35	68.55
chr17	34528376	34528815	440	177	34528553	25	126.33	19.67
chr17	34574441	34574992	552	335	34574776	53	246.89	17.88
chr17	34811111	34811729	619	367	34811478	47	228.21	20.52
chr17	34812143	34812740	598	307	34812450	58	331.84	31.16
chr17	35337204	35337710	507	241	35337445	29	118.15	13.1
chr17	35389924	35390744	821	375	35390299	101	575.96	34.06
chr17	35463819	35464688	870	409	35464228	213	1714.44	62.26
chr17	35508814	35509389	576	348	35509162	31	98.38	10.19
chr17	35697154	35697907	754	404	35697558	129	878.93	37.62
chr17	35786526	35786849	324	99	35786625	18	117.01	17.6
chr17	35827018	35828388	1371	785	35827803	488	3100	109.27
chr17	36006156	36006880	725	316	36006472	63	483.94	43.19
chr17	36938051	36938426	376	103	36938154	21	105.44	14.41
chr17	37098288	37099549	1262	934	37099222	133	636.98	33.41
chr17	37196322	37197177	856	377	37196699	331	3100	76.43
chr17	37328538	37329152	615	329	37328867	52	291.01	26.75
chr17	37416583	37417142	560	292	37416875	41	280.27	29.58
chr17	37560344	37560844	501	279	37560623	114	1069.98	66.04
chr17	37793755	37794593	839	361	37794116	163	987.23	31.56
chr17	37828555	37829037	483	249	37828804	28	129.8	14.96
chr17	37941534	37941918	385	206	37941740	25	111.06	11.94
chr17	37972297	37972777	481	238	37972535	23	102.42	12.78
chr17	37983017	37983736	720	308	37983325	99	526.98	30.09
chr17	38082389	38083135	747	326	38082715	104	658.27	46.94
chr17	38403608	38404080	473	267	38403875	57	365.27	28.35
chr17	38530859	38531277	419	176	38531035	85	609.92	33.95
chr17	38575538	38576986	1449	1109	38576647	217	1489.69	49.88
chr17	38979163	38979703	541	234	38979397	50	342.48	33.44
chr17	39135468	39136092	625	301	39135769	61	520.45	60.79
chr17	39333290	39334010	721	321	39333611	96	692.97	50.99
chr17	39632914	39633496	583	206	39633120	46	247.26	25.91
chr17	39721218	39721835	618	344	39721562	76	490.89	28.78
chr17	39777791	39778497	707	309	39778100	121	1016.82	68.63
chr17	39989702	39990421	720	384	39990086	57	389.05	42.44
chr17	40208416	40208854	439	197	40208613	30	117.25	9.91
chr17	40380414	40381053	640	315	40380729	64	259.66	18.63
chr17	40493728	40494966	1239	728	40494456	328	2930.67	62.14
chr17	40568100	40568916	817	388	40568488	148	842.73	30.31
chr17	40580835	40581832	998	595	40581430	124	611.94	23.81
chr17	40594429	40595328	900	437	40594866	168	1196.41	44.18
chr17	40750093	40750770	678	298	40750391	81	413.74	28.58
chr17	41105374	41105901	528	265	41105639	23	146.66	28.25
chr17	41173513	41174228	716	429	41173942	83	630.69	35.53
chr17	41192865	41193273	409	215	41193080	19	94.28	14.49
chr17	41300774	41301228	455	236	41301010	19	124.92	24.15
chr17	42241488	42242132	645	291	42241779	48	196.97	15.86
chr17	42532323	42533000	678	331	42532654	75	742.13	90.68
chr17	43081563	43082541	979	619	43082182	254	2232.91	64.16
chr17	43082745	43083435	691	311	43083056	89	627.48	44.56
chr17	43327593	43329223	1631	844	43328437	791	3100	88.31
chr17	43373409	43374235	827	432	43373841	229	1717.49	53.77
chr17	43379254	43379879	626	234	43379488	41	111.73	7.61
chr17	43402892	43403785	894	401	43403293	125	644.74	27.7
chr17	43479832	43481043	1212	725	43480557	322	2686.39	74.94
chr17	43486509	43487108	600	331	43486840	49	239.76	26.51
chr17	43539516	43540341	826	358	43539874	86	355.34	21.02
chr17	43977256	43977803	548	291	43977547	35	155.87	18.05
chr17	44043143	44043654	512	258	44043401	29	125.78	14.21
chr17	44058577	44059172	596	272	44058849	35	107.08	11.53
chr17	44249232	44249704	473	280	44249512	23	94.37	10.56
chr17	44324593	44325547	955	462	44325055	215	1518.57	39.34
chr17	44624869	44625683	815	488	44625357	211	1809.12	66.27
chr17	44846898	44847805	908	488	44847386	218	1869.46	66.21
chr17	44884541	44884926	386	212	44884753	28	150.13	21.2
chr17	45140169	45140888	720	421	45140590	128	824.67	33.5
chr17	45171975	45172651	677	237	45172212	40	135.99	10.29
chr17	45196287	45197137	851	351	45196638	273	2662.87	76.24
chr17	45220757	45222085	1329	839	45221596	355	3100	92.71
chr17	45527327	45527854	528	283	45527610	52	469.71	66.87
chr17	45856194	45856554	361	110	45856304	22	162.97	25.72
chr17	45992497	45993246	750	517	45993014	76	588.1	51.63
chr17	46081506	46081879	374	257	46081763	27	136.12	16.41
chr17	46299388	46300306	919	500	46299888	116	644.3	35.83
chr17	46553251	46553691	441	284	46553535	20	101.89	14.33
chr17	46692386	46692786	401	112	46692498	29	139.84	17.13
chr17	46804902	46805458	557	279	46805181	75	482.36	32.1
chr17	46856147	46856471	325	177	46856324	17	138.11	25.08
chr17	51170305	51170916	612	149	51170454	32	91.88	8.31
chr17	52645610	52645993	384	170	52645780	15	92.89	20.47
[truncated: 2,728 more rows]

## Sheet: GM_YB_peaks_Table.3
GM12878 NF-YB ChIP-Seq peaks (p-value <=1e-09)									Repeat
chr	start	end	length	summit	summit coordinate	tags	-10*log10(pvalue)	fold enrichment	chr	str	end	name	type	class
chr1	703747	704191	445	249	703996	56	388.57	26.22	N/A	N/A	N/A	N/A	N/A	N/A
chr1	944369	945156	788	424	944793	54	191.06	16.03	chr1	944772	944873	GC_rich	Low_complexity	Low_complexity
chr1	958013	958889	877	417	958430	112	283.26	13.32	N/A	N/A	N/A	N/A	N/A	N/A
chr1	1005130	1005909	780	429	1005559	50	142.75	11.18	N/A	N/A	N/A	N/A	N/A	N/A
chr1	1156851	1157785	935	504	1157355	222	666.7	18.46	N/A	N/A	N/A	N/A	N/A	N/A
chr1	1324033	1325141	1109	698	1324731	155	804.58	27.88	N/A	N/A	N/A	N/A	N/A	N/A
chr1	1436826	1437557	732	468	1437294	168	465.97	12.9	N/A	N/A	N/A	N/A	N/A	N/A
chr1	1971132	1971854	723	438	1971570	143	764.15	25.01	N/A	N/A	N/A	N/A	N/A	N/A
chr1	2467179	2468635	1457	467	2467646	148	131.1	9.58	N/A	N/A	N/A	N/A	N/A	N/A
chr1	2504952	2505734	783	406	2505358	56	112.74	11.3	chr1	2505301	2505591	MLT1I	LTR	MaLR
chr1	3530758	3531881	1124	619	3531377	404	3182.97	66.49	chr1	3531330	3531494	G-rich	Low_complexity	Low_complexity
chr1	3556134	3557010	877	434	3556568	230	762.54	19.41	N/A	N/A	N/A	N/A	N/A	N/A
chr1	3807613	3808137	525	251	3807864	47	94.79	7.2	N/A	N/A	N/A	N/A	N/A	N/A
chr1	3828306	3829322	1017	692	3828998	81	542.6	27.88	chr1	3828480	3829122	MER51A	LTR	ERV1
chr1	3899282	3899908	627	255	3899537	38	204.85	21.65	chr1	3899237	3899573	MLT1K	LTR	MaLR
chr1	5088243	5088707	465	306	5088549	23	112.68	13.71	chr1	5088481	5088761	MLT1I	LTR	MaLR
chr1	5704386	5705065	680	283	5704669	41	190.32	21.05	chr1	5704488	5704875	MLT1K	LTR	MaLR
chr1	5974531	5975910	1380	690	5975221	517	1961.19	23.71	N/A	N/A	N/A	N/A	N/A	N/A
chr1	6016537	6017172	636	301	6016838	82	554.74	35.56	N/A	N/A	N/A	N/A	N/A	N/A
chr1	6242378	6243082	705	413	6242791	113	638.18	28.3	N/A	N/A	N/A	N/A	N/A	N/A
chr1	6377645	6378176	532	378	6378023	28	114.37	15.22	chr1	6377721	6378940	LTR12E	LTR	ERV1
chr1	6562203	6562974	772	363	6562566	78	93.33	6.18	N/A	N/A	N/A	N/A	N/A	N/A
chr1	6645083	6645586	504	193	6645276	21	117.15	17.04	chr1	6645110	6645667	LTR12	LTR	ERV1
chr1	6668024	6668513	490	333	6668357	19	92.55	9.68	chr1	6668055	6668473	MER101	LTR	ERV1
chr1	6767101	6768340	1240	676	6767777	544	2572.7	19.84	N/A	N/A	N/A	N/A	N/A	N/A
chr1	7766335	7767275	941	527	7766862	279	1401.31	20.44	N/A	N/A	N/A	N/A	N/A	N/A
chr1	7936451	7937347	897	434	7936885	122	211.38	10.46	N/A	N/A	N/A	N/A	N/A	N/A
chr1	8008564	8009512	949	481	8009045	150	494.37	18.55	N/A	N/A	N/A	N/A	N/A	N/A
chr1	8087032	8087667	636	310	8087342	57	175.03	13.32	N/A	N/A	N/A	N/A	N/A	N/A
chr1	8135941	8136594	654	210	8136151	33	192.05	21.84	chr1	8135706	8136459	LTR12	LTR	ERV1
chr1	8799844	8800949	1106	475	8800319	240	865.34	18.32	N/A	N/A	N/A	N/A	N/A	N/A
chr1	8860897	8862298	1402	518	8861415	400	1436.27	28.76	N/A	N/A	N/A	N/A	N/A	N/A
chr1	9142821	9143233	413	188	9143009	31	117.02	10.68	chr1	9142932	9143054	MLT1L	LTR	MaLR
chr1	9145283	9146163	881	388	9145671	89	101.84	7.88	N/A	N/A	N/A	N/A	N/A	N/A
chr1	9411129	9412230	1102	588	9411717	394	987.19	15.41	N/A	N/A	N/A	N/A	N/A	N/A
chr1	9570869	9571707	839	472	9571341	115	341.78	15.85	N/A	N/A	N/A	N/A	N/A	N/A
chr1	9832452	9833278	827	539	9832991	61	354.82	24.98	N/A	N/A	N/A	N/A	N/A	N/A
chr1	9925589	9926525	937	476	9926065	151	351.35	13.9	N/A	N/A	N/A	N/A	N/A	N/A
chr1	10015026	10015969	944	497	10015523	125	124.13	8.51	chr1	10015522	10015544	GC_rich	Low_complexity	Low_complexity
chr1	10192454	10193675	1222	621	10193075	428	2216.65	31.67	N/A	N/A	N/A	N/A	N/A	N/A
chr1	10381044	10382278	1235	585	10381629	394	1903.75	34.21	N/A	N/A	N/A	N/A	N/A	N/A
chr1	10751014	10751624	611	356	10751370	33	194.23	18.94	N/A	N/A	N/A	N/A	N/A	N/A
chr1	10855862	10856388	527	199	10856061	31	200.66	25.67	N/A	N/A	N/A	N/A	N/A	N/A
chr1	11042304	11043405	1102	453	11042757	254	1260.29	34.94	N/A	N/A	N/A	N/A	N/A	N/A
chr1	11244615	11245950	1336	657	11245272	437	1385.24	16.4	N/A	N/A	N/A	N/A	N/A	N/A
chr1	11348181	11348947	767	399	11348580	91	639.19	42.09	chr1	11348553	11348619	MLT1K	LTR	MaLR
chr1	11573079	11573563	485	197	11573276	26	156.08	20.74	chr1	11573191	11573529	MLT1J2	LTR	MaLR
chr1	11788224	11789515	1292	518	11788742	173	118.61	7.38	N/A	N/A	N/A	N/A	N/A	N/A
chr1	11890950	11891961	1012	710	11891660	173	331.28	10.43	chr1	11891633	11891787	MLT1J	LTR	MaLR
chr1	11931452	11932193	742	393	11931845	37	161.99	17.4	chr1	11931594	11931974	MLT1K	LTR	MaLR
chr1	12001638	12002675	1038	456	12002094	394	2280.41	31.03	N/A	N/A	N/A	N/A	N/A	N/A
chr1	12078234	12079295	1062	603	12078837	172	1625.79	88.55	chr1	12078393	12078889	MLT1K	LTR	MaLR
chr1	12536328	12537129	802	430	12536758	47	162.04	14.88	chr1	12536555	12537088	MLT1K	LTR	MaLR
chr1	13947950	13948795	846	470	13948420	107	181.71	10.95	N/A	N/A	N/A	N/A	N/A	N/A
chr1	14453354	14453822	469	166	14453520	82	686.63	43.43	N/A	N/A	N/A	N/A	N/A	N/A
chr1	14984076	14984687	612	279	14984355	22	100.44	10.82	N/A	N/A	N/A	N/A	N/A	N/A
chr1	15096026	15096762	737	365	15096391	35	208.27	27.33	chr1	15096180	15096423	MLT1K	LTR	MaLR
chr1	15147317	15147936	620	261	15147578	27	98.69	12.63	chr1	15147238	15147733	MLT1K	LTR	MaLR
chr1	15288505	15289224	720	380	15288885	29	139.78	16.23	chr1	15288661	15289142	MER65D	LTR	ERV1
chr1	15478559	15479112	554	287	15478846	26	102.56	12.63	chr1	15478729	15478908	MLT1K	LTR	MaLR
chr1	15539268	15540096	829	404	15539672	133	832.05	29.53	chr1	15539421	15539777	MLT1H	LTR	MaLR
chr1	15656781	15657386	606	155	15656936	60	522.05	58.86	N/A	N/A	N/A	N/A	N/A	N/A
chr1	15664644	15665037	394	238	15664882	19	122.43	17.87	chr1	15664595	15664938	MLT1K	LTR	MaLR
chr1	15787389	15787864	476	301	15787690	23	144.67	22.07	chr1	15787073	15787821	LTR12D	LTR	ERV1
chr1	15802062	15803257	1196	698	15802760	391	2099.84	35.48	N/A	N/A	N/A	N/A	N/A	N/A
chr1	16032933	16034085	1153	537	16033470	164	256.23	9.84	N/A	N/A	N/A	N/A	N/A	N/A
chr1	16629545	16630260	716	318	16629863	61	253.55	18.04	chr1	16629740	16630238	MLT1K	LTR	MaLR
chr1	17095106	17095819	714	552	17095658	41	182.86	13.83	N/A	N/A	N/A	N/A	N/A	N/A
chr1	17103534	17104420	887	427	17103961	78	133.6	9.74	N/A	N/A	N/A	N/A	N/A	N/A
chr1	17318122	17319193	1072	479	17318601	240	1870.48	64.14	N/A	N/A	N/A	N/A	N/A	N/A
chr1	17355214	17355748	535	165	17355379	35	253.47	27.33	chr1	17355144	17355652	MER51A	LTR	ERV1
chr1	18175707	18176600	894	464	18176171	59	379.05	34.27	chr1	18176001	18176347	MLT1J	LTR	MaLR
chr1	18209505	18209895	391	163	18209668	53	251.5	14.39	chr1	18209474	18209875	MLT1K	LTR	MaLR
chr1	18651378	18652033	656	378	18651756	38	138.91	12.31	chr1	18651537	18651925	MLT1I	LTR	MaLR
chr1	19035472	19036364	893	476	19035948	147	1256.08	79.9	chr1	19035576	19036056	MLT1K	LTR	MaLR
chr1	19101173	19102566	1394	815	19101988	343	934.65	18.23	N/A	N/A	N/A	N/A	N/A	N/A
chr1	19261453	19262310	858	509	19261962	148	1006.94	48.9	chr1	19261897	19262001	LTR67	LTR	ERVL
chr1	19858601	19859198	598	377	19858978	38	115.05	9.35	N/A	N/A	N/A	N/A	N/A	N/A
chr1	19914341	19915177	837	449	19914790	147	621.91	23.75	N/A	N/A	N/A	N/A	N/A	N/A
chr1	20137533	20138117	585	253	20137786	21	108.8	13.66	chr1	20137693	20137873	MLT1J1	LTR	MaLR
chr1	20279967	20280696	730	451	20280418	35	106.65	9.49	N/A	N/A	N/A	N/A	N/A	N/A
chr1	20412119	20412632	514	244	20412363	23	115.12	14.76	N/A	N/A	N/A	N/A	N/A	N/A
chr1	20449435	20450200	766	390	20449825	49	120.14	11.67	N/A	N/A	N/A	N/A	N/A	N/A
chr1	20639584	20640438	855	423	20640007	35	115.97	16.84	chr1	20639773	20640094	MLT1J	LTR	MaLR
chr1	20768546	20768999	454	278	20768824	21	129.92	13.66	chr1	20768693	20769018	MLT1J2	LTR	MaLR
chr1	20860090	20861148	1059	614	20860704	389	1981.64	25.88	N/A	N/A	N/A	N/A	N/A	N/A
chr1	20865628	20866290	663	399	20866027	101	926.19	70.51	chr1	20865984	20866148	MLT1K	LTR	MaLR
chr1	20930958	20931889	932	387	20931345	114	411.68	16.6	N/A	N/A	N/A	N/A	N/A	N/A
chr1	20985264	20986427	1164	586	20985850	275	1150.29	22.7	N/A	N/A	N/A	N/A	N/A	N/A
chr1	21544145	21545272	1128	511	21544656	324	1809.79	40.05	N/A	N/A	N/A	N/A	N/A	N/A
chr1	21639010	21639425	416	166	21639176	24	114.28	12.03	N/A	N/A	N/A	N/A	N/A	N/A
chr1	21963617	21964063	447	275	21963892	34	153.67	13.53	chr1	21963810	21964078	MER21B	LTR	ERV1
chr1	22223942	22224989	1048	278	22224220	123	190.5	9.91	N/A	N/A	N/A	N/A	N/A	N/A
chr1	22230267	22231001	735	218	22230485	83	347.11	18.64	N/A	N/A	N/A	N/A	N/A	N/A
chr1	22627479	22628299	821	453	22627932	391	3100	225.11	chr1	22627779	22628024	MLT1J	LTR	MaLR
chr1	22650667	22651259	593	191	22650858	125	156.73	6.81	N/A	N/A	N/A	N/A	N/A	N/A
chr1	23230039	23230720	682	285	23230324	110	765.66	40.48	N/A	N/A	N/A	N/A	N/A	N/A
chr1	23399879	23400543	665	280	23400159	35	127.84	13.92	chr1	23400124	23400230	MLT1K	LTR	MaLR
chr1	23543005	23544132	1128	562	23543567	360	1295.81	19.27	N/A	N/A	N/A	N/A	N/A	N/A
chr1	23567014	23567990	977	494	23567508	243	514.3	13.82	N/A	N/A	N/A	N/A	N/A	N/A
chr1	23720506	23721235	730	329	23720835	46	192.73	19.58	N/A	N/A	N/A	N/A	N/A	N/A
chr1	23815289	23815891	603	439	23815728	56	159.87	12.28	chr1	23815644	23815861	MLT1K	LTR	MaLR
chr1	23895276	23896058	783	338	23895614	45	119.23	13.71	N/A	N/A	N/A	N/A	N/A	N/A
chr1	24066992	24067807	816	435	24067427	89	195.59	11.6	N/A	N/A	N/A	N/A	N/A	N/A
chr1	24582982	24583735	754	409	24583391	62	149.53	11.06	N/A	N/A	N/A	N/A	N/A	N/A
chr1	24612360	24613264	905	571	24612931	174	988.79	32.65	N/A	N/A	N/A	N/A	N/A	N/A
chr1	24614191	24615356	1166	570	24614761	346	1292.91	20.48	N/A	N/A	N/A	N/A	N/A	N/A
chr1	24628542	24629101	560	401	24628943	30	190.83	16.16	chr1	24628935	24629309	Charlie2a	DNA	MER1_type
chr1	24689323	24689962	640	418	24689741	68	608.58	51.5	chr1	24688910	24690141	LTR12E	LTR	ERV1
chr1	24841624	24842706	1083	505	24842129	313	846.3	15.07	N/A	N/A	N/A	N/A	N/A	N/A
chr1	24896416	24896993	578	243	24896659	53	326.42	25.86	chr1	24896196	24896974	LTR12	LTR	ERV1
chr1	24904016	24905018	1003	552	24904568	125	751.37	36.08	N/A	N/A	N/A	N/A	N/A	N/A
chr1	24914545	24915151	607	377	24914922	29	98.65	12.88	chr1	24914738	24915007	MLT1K	LTR	MaLR
chr1	24921074	24921686	613	297	24921371	48	363.94	39.94	chr1	24920421	24921824	LTR12C	LTR	ERV1
chr1	24923266	24924075	810	441	24923707	86	756.12	61.85	chr1	24923428	24923834	MLT1L	LTR	MaLR
chr1	25129004	25129871	868	444	25129448	139	358.56	13.62	N/A	N/A	N/A	N/A	N/A	N/A
chr1	25155919	25156774	856	351	25156270	85	161.85	8.59	N/A	N/A	N/A	N/A	N/A	N/A
chr1	25163719	25164877	1159	557	25164276	245	418.2	12	N/A	N/A	N/A	N/A	N/A	N/A
chr1	25186921	25187822	902	444	25187365	100	514.57	29.26	chr1	25187003	25187611	MLT1K	LTR	MaLR
chr1	25230661	25231961	1301	836	25231497	146	241.65	10.53	N/A	N/A	N/A	N/A	N/A	N/A
chr1	25308271	25309191	921	454	25308725	114	631.89	32.87	chr1	25308691	25309128	MLT1L	LTR	MaLR
chr1	25628828	25630417	1590	1028	25629856	587	2914.49	30.3	N/A	N/A	N/A	N/A	N/A	N/A
chr1	25748303	25749323	1021	578	25748881	266	905.63	20.01	N/A	N/A	N/A	N/A	N/A	N/A
chr1	25807467	25808159	693	347	25807814	75	189.78	10.96	chr1	25807577	25807932	MLT1I	LTR	MaLR
chr1	25815114	25816055	942	430	25815544	88	261.47	15.46	N/A	N/A	N/A	N/A	N/A	N/A
chr1	25914956	25915583	628	227	25915183	81	702.02	56.58	chr1	25914877	25915360	MLT1J	LTR	MaLR
chr1	26234078	26235153	1076	505	26234583	312	1209.39	21.2	N/A	N/A	N/A	N/A	N/A	N/A
chr1	26310500	26311779	1280	360	26310860	175	486.41	11.12	N/A	N/A	N/A	N/A	N/A	N/A
chr1	26325121	26326093	973	503	26325624	145	606.49	23.64	N/A	N/A	N/A	N/A	N/A	N/A
chr1	26432638	26433751	1114	537	26433175	234	355.61	9.2	N/A	N/A	N/A	N/A	N/A	N/A
chr1	26478644	26479541	898	445	26479089	123	296.98	13.68	N/A	N/A	N/A	N/A	N/A	N/A
chr1	26505197	26506217	1021	543	26505740	264	892.11	21.43	N/A	N/A	N/A	N/A	N/A	N/A
chr1	26670783	26672435	1653	734	26671517	249	829.89	27.21	N/A	N/A	N/A	N/A	N/A	N/A
chr1	26728451	26729279	829	383	26728834	76	206.13	15.15	N/A	N/A	N/A	N/A	N/A	N/A
chr1	26744410	26745416	1007	452	26744862	145	271.86	10.46	N/A	N/A	N/A	N/A	N/A	N/A
chr1	26819598	26821216	1619	1042	26820640	138	162.79	10.89	N/A	N/A	N/A	N/A	N/A	N/A
chr1	26897017	26897744	728	359	26897376	80	96.91	8.36	N/A	N/A	N/A	N/A	N/A	N/A
chr1	27063706	27064851	1146	593	27064299	322	1408.46	26.06	N/A	N/A	N/A	N/A	N/A	N/A
chr1	27120143	27121216	1074	572	27120715	243	713.19	18.59	N/A	N/A	N/A	N/A	N/A	N/A
chr1	27211532	27212560	1029	496	27212028	223	1710.26	45.7	N/A	N/A	N/A	N/A	N/A	N/A
chr1	27251587	27252181	595	181	27251768	26	150.77	22.07	chr1	27251760	27251834	MLT1K	LTR	MaLR
chr1	27432891	27433925	1035	663	27433554	198	491.1	12.4	N/A	N/A	N/A	N/A	N/A	N/A
chr1	27591180	27592194	1015	458	27591638	156	684.15	28.86	N/A	N/A	N/A	N/A	N/A	N/A
chr1	27688563	27689971	1409	748	27689311	410	1335.53	24.02	N/A	N/A	N/A	N/A	N/A	N/A
chr1	27799370	27799967	598	369	27799739	90	572.12	31.67	N/A	N/A	N/A	N/A	N/A	N/A
chr1	27858811	27859491	681	432	27859243	81	131.32	8.28	N/A	N/A	N/A	N/A	N/A	N/A
chr1	27870820	27871904	1085	535	27871355	166	322.34	11.75	N/A	N/A	N/A	N/A	N/A	N/A
chr1	27924391	27925929	1539	579	27924970	208	150.56	9.76	N/A	N/A	N/A	N/A	N/A	N/A
chr1	27989245	27989905	661	413	27989658	24	123.07	23.12	chr1	27989268	27989707	LTR12B	LTR	ERV1
chr1	28113150	28114635	1486	592	28113742	480	1322.12	14.43	N/A	N/A	N/A	N/A	N/A	N/A
chr1	28434408	28435934	1527	735	28435143	574	2559.78	28.14	N/A	N/A	N/A	N/A	N/A	N/A
chr1	28445905	28447040	1136	544	28446449	334	1515.85	27.53	N/A	N/A	N/A	N/A	N/A	N/A
chr1	28457973	28458927	955	514	28458487	141	335.84	13.74	N/A	N/A	N/A	N/A	N/A	N/A
chr1	28833394	28833816	423	281	28833675	28	208.1	28.38	N/A	N/A	N/A	N/A	N/A	N/A
chr1	28868592	28869283	692	524	28869116	96	180.44	8.99	N/A	N/A	N/A	N/A	N/A	N/A
chr1	29052010	29052790	781	359	29052369	57	414.21	45.1	chr1	29052244	29052477	MLT1J2	LTR	MaLR
chr1	29085462	29086729	1268	705	29086167	268	1014.59	25.25	N/A	N/A	N/A	N/A	N/A	N/A
chr1	29112974	29113986	1013	575	29113549	118	312.33	14.43	chr1	29113536	29113557	GC_rich	Low_complexity	Low_complexity
chr1	29329714	29329985	272	137	29329851	21	201.36	22.07	chr1	29329343	29330741	LTR12C	LTR	ERV1
chr1	29429741	29430472	732	283	29430024	81	100.8	7.58	N/A	N/A	N/A	N/A	N/A	N/A
chr1	29549014	29549625	612	316	29549330	37	152.66	12.88	chr1	29549220	29549431	MLT1K	LTR	MaLR
chr1	29712114	29713151	1038	526	29712640	194	1374.98	51.71	chr1	29712486	29712853	MLT1K	LTR	MaLR
chr1	29739926	29740362	437	279	29740205	23	129.7	15.58	chr1	29740180	29740368	MLT1K	LTR	MaLR
chr1	29919435	29920183	749	451	29919886	45	264.16	31.04	chr1	29919735	29920009	MLT1K	LTR	MaLR
chr1	29984511	29985204	694	300	29984811	36	204.51	22.55	N/A	N/A	N/A	N/A	N/A	N/A
chr1	30109902	30110527	626	289	30110191	31	146.33	16.6	N/A	N/A	N/A	N/A	N/A	N/A
chr1	30304578	30305201	624	277	30304855	32	115.25	10.31	chr1	30304520	30305098	MLT1K	LTR	MaLR
chr1	30362952	30363782	831	398	30363350	60	311.14	28.26	chr1	30363136	30363558	MLT1K	LTR	MaLR
chr1	30716671	30717215	545	230	30716901	31	151.32	17.04	chr1	30716777	30716919	MLT1K	LTR	MaLR
chr1	31003795	31005093	1299	669	31004464	416	2498.9	42.27	N/A	N/A	N/A	N/A	N/A	N/A
chr1	31023734	31024386	653	348	31024082	66	217.74	11.6	chr1	31023919	31024274	MLT1K	LTR	MaLR
chr1	31069520	31070492	973	500	31070020	99	257.05	14.64	N/A	N/A	N/A	N/A	N/A	N/A
chr1	31099316	31100126	811	383	31099699	71	280.98	18.04	chr1	31099431	31099868	MLT1J	LTR	MaLR
chr1	31397663	31398299	637	306	31397969	36	224.02	30.38	chr1	31397916	31398178	MLT1K	LTR	MaLR
chr1	31541791	31542931	1141	548	31542339	203	375.33	13.36	N/A	N/A	N/A	N/A	N/A	N/A
chr1	31882669	31883607	939	471	31883140	215	379.2	12.23	N/A	N/A	N/A	N/A	N/A	N/A
chr1	32166770	32167483	714	306	32167076	102	356.52	16.84	N/A	N/A	N/A	N/A	N/A	N/A
chr1	32176326	32177180	855	300	32176626	196	592.35	18.18	N/A	N/A	N/A	N/A	N/A	N/A
chr1	32417299	32418650	1352	545	32417844	336	986.45	17.24	N/A	N/A	N/A	N/A	N/A	N/A
chr1	32529624	32531026	1403	601	32530225	360	1553.93	31.32	N/A	N/A	N/A	N/A	N/A	N/A
chr1	32574284	32574923	640	226	32574510	90	268.1	12.2	N/A	N/A	N/A	N/A	N/A	N/A
chr1	32632297	32633211	915	456	32632753	241	562.78	12	N/A	N/A	N/A	N/A	N/A	N/A
chr1	32702795	32703534	740	413	32703208	37	127.61	14.43	N/A	N/A	N/A	N/A	N/A	N/A
chr1	32850037	32850883	847	497	32850534	66	102.54	8.54	N/A	N/A	N/A	N/A	N/A	N/A
chr1	32888503	32889807	1305	778	32889281	179	256.93	12.35	N/A	N/A	N/A	N/A	N/A	N/A
chr1	32991701	32992447	747	434	32992135	54	147.66	12.28	N/A	N/A	N/A	N/A	N/A	N/A
chr1	33274289	33275840	1552	889	33275178	459	1649.11	27.11	N/A	N/A	N/A	N/A	N/A	N/A
chr1	33283285	33283899	615	297	33283582	28	165.57	26.28	N/A	N/A	N/A	N/A	N/A	N/A
chr1	33318915	33319700	786	282	33319197	71	175.62	9.47	N/A	N/A	N/A	N/A	N/A	N/A
chr1	33476573	33476974	402	148	33476721	48	419.27	36.08	chr1	33476641	33476738	MLT1K	LTR	MaLR
chr1	33489773	33490393	621	403	33490176	25	94.86	11.36	chr1	33490104	33490258	MLT1I	LTR	MaLR
chr1	33540384	33541097	714	399	33540783	83	412.19	23.81	N/A	N/A	N/A	N/A	N/A	N/A
chr1	33663913	33664494	582	394	33664307	58	394.74	28.86	N/A	N/A	N/A	N/A	N/A	N/A
chr1	33710006	33711028	1023	633	33710639	268	813.27	17.75	N/A	N/A	N/A	N/A	N/A	N/A
chr1	34716455	34717189	735	443	34716898	57	352.9	31.03	chr1	34716809	34717145	MLT1I	LTR	MaLR
chr1	35097498	35098356	859	474	35097972	117	188.7	10.33	N/A	N/A	N/A	N/A	N/A	N/A
chr1	35430965	35432182	1218	525	35431490	472	2319.61	27.51	N/A	N/A	N/A	N/A	N/A	N/A
chr1	35467771	35468398	628	239	35468010	33	105.9	9.47	chr1	35468004	35468184	MER51A	LTR	ERV1
chr1	35795383	35796512	1130	543	35795926	283	867.71	17.63	N/A	N/A	N/A	N/A	N/A	N/A
chr1	36007906	36008616	711	331	36008237	104	257.6	11.26	N/A	N/A	N/A	N/A	N/A	N/A
chr1	36388633	36389597	965	519	36389152	86	91.14	7.35	N/A	N/A	N/A	N/A	N/A	N/A
chr1	36544663	36545720	1058	564	36545227	227	1271.26	37.52	N/A	N/A	N/A	N/A	N/A	N/A
chr1	36623745	36625034	1290	574	36624319	259	710.56	19.9	N/A	N/A	N/A	N/A	N/A	N/A
chr1	36688114	36689297	1184	628	36688742	266	482.2	12.51	N/A	N/A	N/A	N/A	N/A	N/A
chr1	36988928	36989363	436	242	36989170	38	318.55	31.53	chr1	36989055	36989262	MLT1H	LTR	MaLR
chr1	37397096	37397673	578	386	37397482	24	121.32	16.23	chr1	37397146	37397602	LTR67	LTR	ERVL
chr1	37513367	37513939	573	339	37513706	36	193.61	21.36	N/A	N/A	N/A	N/A	N/A	N/A
chr1	37527011	37527909	899	345	37527356	109	211.42	10.39	chr1	37527177	37527560	MLT1H	LTR	MaLR
chr1	37648196	37648745	550	235	37648431	19	97.13	14.72	N/A	N/A	N/A	N/A	N/A	N/A
chr1	37757059	37757373	315	158	37757217	21	147.25	17.62	chr1	37756256	37757747	LTR12C	LTR	ERV1
chr1	37928438	37929463	1026	479	37928917	192	468.82	15.9	N/A	N/A	N/A	N/A	N/A	N/A
chr1	37930179	37931228	1050	542	37930721	276	704.76	13.51	N/A	N/A	N/A	N/A	N/A	N/A
chr1	38003128	38003921	794	381	38003509	38	150.07	16.17	N/A	N/A	N/A	N/A	N/A	N/A
chr1	38097272	38098576	1305	688	38097960	327	1294.42	27.79	N/A	N/A	N/A	N/A	N/A	N/A
chr1	38160920	38161484	565	327	38161247	59	164.45	8.7	N/A	N/A	N/A	N/A	N/A	N/A
chr1	38169583	38170737	1155	606	38170189	301	1311.91	25.25	N/A	N/A	N/A	N/A	N/A	N/A
chr1	38250562	38251437	876	373	38250935	154	335.14	9.4	N/A	N/A	N/A	N/A	N/A	N/A
chr1	38284730	38285729	1000	517	38285247	161	732.98	20.2	N/A	N/A	N/A	N/A	N/A	N/A
chr1	38390806	38391634	829	403	38391209	112	840.35	45.7	chr1	38391122	38391513	MLT1I	LTR	MaLR
chr1	38727837	38728345	509	335	38728172	43	105.42	8.03	N/A	N/A	N/A	N/A	N/A	N/A
chr1	39097631	39098712	1082	466	39098097	167	323.68	12.34	N/A	N/A	N/A	N/A	N/A	N/A
chr1	39729424	39730180	757	390	39729814	157	1264.63	53.71	chr1	39729785	39729827	GC_rich	Low_complexity	Low_complexity
chr1	39841931	39842307	377	216	39842147	35	264.87	27.26	chr1	39842002	39842477	LTR12B	LTR	ERV1
chr1	39915864	39916390	527	277	39916141	20	108.75	16.82	N/A	N/A	N/A	N/A	N/A	N/A
chr1	39929333	39930190	858	419	39929752	58	253.45	24.22	N/A	N/A	N/A	N/A	N/A	N/A
chr1	40026797	40027627	831	408	40027205	63	261.79	18.94	chr1	40027181	40027259	G-rich	Low_complexity	Low_complexity
chr1	40136860	40137943	1084	580	40137440	154	902.43	31.47	N/A	N/A	N/A	N/A	N/A	N/A
chr1	40192824	40193630	807	510	40193334	168	713.04	23.29	N/A	N/A	N/A	N/A	N/A	N/A
chr1	40198459	40199352	894	427	40198886	69	157.86	11.66	N/A	N/A	N/A	N/A	N/A	N/A
chr1	40795914	40796399	486	308	40796222	25	162.01	18.92	chr1	40795695	40797594	LTR12C	LTR	ERV1
chr1	40929717	40930868	1152	651	40930368	197	251.58	10	N/A	N/A	N/A	N/A	N/A	N/A
chr1	40946706	40948392	1687	831	40947537	657	1925.67	19.2	N/A	N/A	N/A	N/A	N/A	N/A
chr1	41100349	41101169	821	315	41100664	149	710.47	23.9	N/A	N/A	N/A	N/A	N/A	N/A
chr1	41217633	41218804	1172	594	41218227	359	1898.97	35.92	N/A	N/A	N/A	N/A	N/A	N/A
chr1	41571571	41571978	408	219	41571790	24	162.03	19.5	chr1	41571594	41571883	MLT1K	LTR	MaLR
chr1	41598800	41599895	1096	641	41599441	198	933.93	25.48	N/A	N/A	N/A	N/A	N/A	N/A
chr1	41635022	41635640	619	432	41635454	30	143.24	16.38	chr1	41635412	41635491	MLT1K	LTR	MaLR
chr1	41700699	41701160	462	320	41701019	22	117.53	16.67	chr1	41700658	41701117	MLT1K	LTR	MaLR
chr1	42158030	42158885	856	463	42158493	155	767.26	24.71	N/A	N/A	N/A	N/A	N/A	N/A
chr1	42608532	42608963	432	164	42608696	47	366.75	30.06	chr1	42608511	42609021	MLT1J	LTR	MaLR
chr1	42618560	42619345	786	425	42618985	73	401.78	30.92	N/A	N/A	N/A	N/A	N/A	N/A
chr1	42700957	42701870	914	500	42701457	134	180.44	7.86	N/A	N/A	N/A	N/A	N/A	N/A
chr1	42920077	42920838	762	509	42920586	228	699.51	12.54	N/A	N/A	N/A	N/A	N/A	N/A
chr1	43084088	43085283	1196	623	43084711	383	1660.84	26.07	N/A	N/A	N/A	N/A	N/A	N/A
chr1	43154272	43155201	930	434	43154706	53	343.91	28.38	chr1	43154366	43155802	LTR12C	LTR	ERV1
chr1	43162193	43163157	965	416	43162609	309	1268.39	22.96	N/A	N/A	N/A	N/A	N/A	N/A
chr1	43196280	43197476	1197	226	43196506	102	135.64	7.64	N/A	N/A	N/A	N/A	N/A	N/A
chr1	43596662	43597809	1148	519	43597181	399	2370.64	44.11	N/A	N/A	N/A	N/A	N/A	N/A
chr1	43605929	43606798	870	414	43606343	69	91.79	7.9	chr1	43606332	43606402	GC_rich	Low_complexity	Low_complexity
chr1	43626279	43627182	904	446	43626725	62	116.07	9.14	N/A	N/A	N/A	N/A	N/A	N/A
chr1	43627616	43628309	694	475	43628091	85	143.14	9.15	N/A	N/A	N/A	N/A	N/A	N/A
chr1	43692450	43693353	904	518	43692968	171	736.45	23.02	N/A	N/A	N/A	N/A	N/A	N/A
chr1	43749668	43750333	666	232	43749900	49	265.09	27.06	chr1	43749700	43750146	MLT1K	LTR	MaLR
chr1	43887667	43889172	1506	632	43888299	571	2564.6	24.53	N/A	N/A	N/A	N/A	N/A	N/A
chr1	43945126	43946220	1095	577	43945703	292	1079.44	19.9	N/A	N/A	N/A	N/A	N/A	N/A
chr1	44207706	44208758	1053	428	44208134	238	892.37	22.62	N/A	N/A	N/A	N/A	N/A	N/A
chr1	44593189	44594160	972	400	44593589	211	515.64	15.41	N/A	N/A	N/A	N/A	N/A	N/A
chr1	44910198	44910996	799	400	44910598	63	114.62	6.59	N/A	N/A	N/A	N/A	N/A	N/A
chr1	44912087	44913436	1350	790	44912877	389	1100.88	17.54	N/A	N/A	N/A	N/A	N/A	N/A
chr1	45081350	45081718	369	206	45081556	23	126.13	13.98	N/A	N/A	N/A	N/A	N/A	N/A
chr1	45577620	45578846	1227	288	45577908	215	641.35	11.42	chr1	45577827	45577953	L2	LINE	L2
chr1	45729076	45730392	1317	550	45729626	417	1789.09	22.69	N/A	N/A	N/A	N/A	N/A	N/A
chr1	45821458	45822332	875	275	45821733	160	229.31	8.82	N/A	N/A	N/A	N/A	N/A	N/A
chr1	46023715	46024382	668	349	46024064	38	138.91	15.42	N/A	N/A	N/A	N/A	N/A	N/A
chr1	46303450	46304204	755	376	46303826	116	425.08	18.87	chr1	46303664	46304136	MLT1J	LTR	MaLR
chr1	46370583	46372168	1586	778	46371361	488	1560.13	13.9	N/A	N/A	N/A	N/A	N/A	N/A
chr1	46485192	46486591	1400	762	46485954	350	1428.52	30.8	N/A	N/A	N/A	N/A	N/A	N/A
chr1	46727663	46728420	758	376	46728039	60	332.38	28.26	chr1	46728028	46728056	GC_rich	Low_complexity	Low_complexity
chr1	46956950	46957886	937	481	46957431	108	186.55	10.28	N/A	N/A	N/A	N/A	N/A	N/A
chr1	47551710	47553041	1332	736	47552446	505	2159.98	21.06	N/A	N/A	N/A	N/A	N/A	N/A
chr1	51198202	51199079	878	330	51198532	183	320.46	9.62	chr1	51198468	51198548	(CCG)n	Simple_repeat	Simple_repeat
chr1	51340198	51340708	511	314	51340512	25	141.68	13.53	chr1	51340352	51340584	MLT1J1	LTR	MaLR
chr1	51578429	51579088	660	366	51578795	34	90.66	8.63	N/A	N/A	N/A	N/A	N/A	N/A
chr1	51659949	51660856	908	524	51660473	110	601.33	25.25	N/A	N/A	N/A	N/A	N/A	N/A
chr1	51967298	51968384	1087	657	51967955	197	375.21	12.87	N/A	N/A	N/A	N/A	N/A	N/A
chr1	52084655	52085174	520	359	52085014	28	184.42	24.18	chr1	52084709	52086191	LTR12C	LTR	ERV1
chr1	52116654	52117783	1130	478	52117132	283	1085.82	25.13	N/A	N/A	N/A	N/A	N/A	N/A
chr1	52211625	52212441	817	360	52211985	34	165.2	16.23	chr1	52211766	52212273	Charlie7	DNA	MER1_type
chr1	52809751	52810598	848	457	52810208	77	524.1	41.23	chr1	52809903	52810579	MER51A	LTR	ERV1
chr1	52941039	52941937	899	322	52941361	373	2389.16	31.51	N/A	N/A	N/A	N/A	N/A	N/A
chr1	53563889	53565350	1462	788	53564677	386	1283.22	22.28	N/A	N/A	N/A	N/A	N/A	N/A
chr1	53595095	53595707	613	269	53595364	35	184.91	21.38	chr1	53595278	53595509	MLT1J1	LTR	MaLR
chr1	53977071	53978110	1040	480	53977551	231	1526.5	49.61	N/A	N/A	N/A	N/A	N/A	N/A
chr1	54241659	54242038	380	249	54241908	47	457.95	46.25	chr1	54241477	54243048	LTR12C	LTR	ERV1
chr1	54290617	54292073	1457	451	54291068	260	307.33	13.94	chr1	54290982	54291085	L2	LINE	L2
chr1	54437827	54438888	1062	532	54438359	222	835.24	22.7	N/A	N/A	N/A	N/A	N/A	N/A
chr1	54644511	54645238	728	271	54644782	256	1924.27	52.77	N/A	N/A	N/A	N/A	N/A	N/A
chr1	54645420	54646522	1103	495	54645915	259	1252.86	28.86	N/A	N/A	N/A	N/A	N/A	N/A
chr1	54726223	54727162	940	453	54726676	179	881.62	34.5	N/A	N/A	N/A	N/A	N/A	N/A
chr1	54752447	54752857	411	157	54752604	29	222.5	25.23	chr1	54752535	54752709	MLT1K	LTR	MaLR
chr1	55002305	55003498	1194	643	55002948	393	1318.46	19.24	N/A	N/A	N/A	N/A	N/A	N/A
chr1	55013167	55014064	898	387	55013554	157	1264.63	55.08	chr1	55013497	55013725	MLT1K	LTR	MaLR
chr1	55124928	55126133	1206	631	55125559	303	1598.09	34.18	N/A	N/A	N/A	N/A	N/A	N/A
chr1	55203918	55205068	1151	521	55204439	367	2613.63	58.45	chr1	55204327	55204775	MLT1L	LTR	MaLR
chr1	56395204	56395759	556	319	56395523	26	132.41	16.4	N/A	N/A	N/A	N/A	N/A	N/A
chr1	56570095	56571035	941	504	56570599	109	804.14	48.21	N/A	N/A	N/A	N/A	N/A	N/A
chr1	57310802	57311635	834	447	57311249	48	154.25	18.48	N/A	N/A	N/A	N/A	N/A	N/A
chr1	58489975	58490338	364	204	58490179	20	114.87	13.33	N/A	N/A	N/A	N/A	N/A	N/A
chr1	58682576	58683287	712	331	58682907	62	431.46	41.57	chr1	58682857	58683025	MLT1I	LTR	MaLR
chr1	58980165	58980692	528	220	58980385	20	96.7	13.53	N/A	N/A	N/A	N/A	N/A	N/A
chr1	59021965	59022880	916	407	59022372	222	830.33	17.39	N/A	N/A	N/A	N/A	N/A	N/A
chr1	59246648	59247606	959	457	59247105	85	219.48	13.95	N/A	N/A	N/A	N/A	N/A	N/A
chr1	59745058	59745848	791	414	59745472	33	129.06	13.18	chr1	59745242	59745660	MER57A	LTR	ERV1
chr1	60052465	60053440	976	377	60052842	109	508.9	16.55	N/A	N/A	N/A	N/A	N/A	N/A
chr1	61314890	61316058	1169	751	61315641	63	169.35	8.42	chr1	61315608	61315668	GA-rich	Low_complexity	Low_complexity
chr1	61316080	61316785	706	272	61316352	71	262.83	12.93	N/A	N/A	N/A	N/A	N/A	N/A
chr1	62674148	62675608	1461	626	62674774	423	1080.46	15.74	N/A	N/A	N/A	N/A	N/A	N/A
chr1	62915375	62915777	403	210	62915585	32	209.66	20.2	chr1	62915371	62915676	MLT1K	LTR	MaLR
chr1	63192966	63193491	526	226	63193192	34	169.72	18.64	chr1	63192892	63193355	MLT1J	LTR	MaLR
chr1	63807658	63808489	832	432	63808090	113	981.35	72.97	N/A	N/A	N/A	N/A	N/A	N/A
chr1	64441540	64442077	538	375	64441915	26	122.97	10.82	N/A	N/A	N/A	N/A	N/A	N/A
chr1	65568946	65569637	692	319	65569265	86	735.93	51.6	chr1	65569037	65569441	MLT1J	LTR	MaLR
chr1	67127228	67127863	636	156	67127384	31	171.04	13.53	N/A	N/A	N/A	N/A	N/A	N/A
chr1	67162722	67163964	1243	470	67163192	210	357.01	11.12	N/A	N/A	N/A	N/A	N/A	N/A
chr1	67167339	67168130	792	433	67167772	88	223.76	15	N/A	N/A	N/A	N/A	N/A	N/A
chr1	67386908	67387563	656	186	67387094	58	151.16	9.94	N/A	N/A	N/A	N/A	N/A	N/A
chr1	67922860	67923923	1064	583	67923443	246	847.33	18.16	N/A	N/A	N/A	N/A	N/A	N/A
chr1	68734983	68735889	907	462	68735445	90	147.33	10.2	N/A	N/A	N/A	N/A	N/A	N/A
chr1	70648869	70650050	1182	581	70649450	330	831.52	17.02	N/A	N/A	N/A	N/A	N/A	N/A
chr1	70879968	70880761	794	416	70880384	58	432.58	42.04	chr1	70880210	70880487	MLT1J	LTR	MaLR
chr1	71278865	71279457	593	179	71279044	27	119.84	14.98	chr1	71278895	71279160	L2	LINE	L2
chr1	71800989	71801531	543	245	71801234	22	123.64	16.82	chr1	71801005	71801307	MLT1I	LTR	MaLR
chr1	72073247	72073866	620	277	72073524	28	164.67	22.07	chr1	72073181	72073678	MLT1H	LTR	MaLR
chr1	73492055	73492804	750	365	73492420	27	127.33	23.12	chr1	73492379	73492980	LTR12_	LTR	ERV1
chr1	74703895	74704447	553	314	74704209	30	152.58	17.32	chr1	74703378	74704519	LTR12E	LTR	ERV1
chr1	74821523	74822193	671	363	74821886	38	251.22	37.84	N/A	N/A	N/A	N/A	N/A	N/A
chr1	74978577	74978950	374	145	74978722	30	245.51	29.43	chr1	74978304	74979189	LTR12	LTR	ERV1
chr1	74983571	74984205	635	345	74983916	25	135.37	21.02	chr1	74983916	74983977	L2	LINE	L2
chr1	76312575	76313277	703	328	76312903	32	140.43	15.87	N/A	N/A	N/A	N/A	N/A	N/A
chr1	76541228	76541821	594	158	76541386	36	248.91	26.28	chr1	76541043	76541743	MER51A	LTR	ERV1
chr1	78227782	78228757	976	470	78228252	175	1484.8	66.9	chr1	78228219	78228457	MLT1L	LTR	MaLR
chr1	79427432	79428217	786	430	79427862	35	199.39	16.82	N/A	N/A	N/A	N/A	N/A	N/A
chr1	79682933	79683604	672	312	79683245	35	126.54	15.98	N/A	N/A	N/A	N/A	N/A	N/A
chr1	80821640	80822347	708	166	80821806	36	223.46	17.87	chr1	80821750	80822636	LTR12	LTR	ERV1
chr1	81700238	81700696	459	303	81700541	19	110.7	14.72	chr1	81700259	81700761	LTR12	LTR	ERV1
chr1	84867426	84868169	744	404	84867830	31	122.04	11.79	chr1	84867518	84867967	MER101	LTR	ERV1
chr1	84928554	84929567	1014	336	84928890	306	1463.11	27.06	N/A	N/A	N/A	N/A	N/A	N/A
chr1	85140844	85141336	493	151	85140995	32	232.42	30.48	chr1	85140953	85141718	LTR12	LTR	ERV1
chr1	85299941	85301018	1078	582	85300523	282	1024.16	21.18	N/A	N/A	N/A	N/A	N/A	N/A
chr1	85516999	85517746	748	286	85517285	57	113.88	9.22	N/A	N/A	N/A	N/A	N/A	N/A
chr1	85541859	85542650	792	349	85542208	85	512.39	32.98	chr1	85542039	85542378	MLT1J	LTR	MaLR
chr1	86634320	86635157	838	300	86634620	109	190.96	7.81	N/A	N/A	N/A	N/A	N/A	N/A
chr1	86761459	86762196	738	351	86761810	22	97.61	16.82	chr1	86761399	86762640	LTR12C	LTR	ERV1
chr1	87525081	87525811	731	396	87525477	32	181.7	28.38	chr1	87525352	87525738	MLT1J	LTR	MaLR
chr1	87566217	87567040	824	458	87566675	173	566.96	16.8	N/A	N/A	N/A	N/A	N/A	N/A
chr1	88064666	88065502	837	428	88065094	59	172.65	15.74	N/A	N/A	N/A	N/A	N/A	N/A
chr1	88639643	88640164	522	271	88639914	41	127.51	10.22	N/A	N/A	N/A	N/A	N/A	N/A
chr1	88921975	88922952	978	456	88922431	133	194.61	8.86	N/A	N/A	N/A	N/A	N/A	N/A
chr1	89213040	89213437	398	164	89213204	18	108.71	17.04	chr1	89212871	89213556	LTR12	LTR	ERV1
chr1	89751085	89751757	673	279	89751364	37	240.71	26.28	chr1	89750851	89751714	L1M4c	LINE	L1
chr1	89761781	89763455	1675	1190	89762971	276	802.57	23.75	N/A	N/A	N/A	N/A	N/A	N/A
chr1	90058565	90059692	1128	502	90059067	227	1059.28	30.47	N/A	N/A	N/A	N/A	N/A	N/A
chr1	91045364	91045957	594	278	91045642	35	186.27	22.37	chr1	91045404	91045783	MLT1H	LTR	MaLR
chr1	91259123	91260096	974	492	91259615	183	650.74	21.18	N/A	N/A	N/A	N/A	N/A	N/A
chr1	91260104	91260868	765	287	91260391	87	102.67	7.45	N/A	N/A	N/A	N/A	N/A	N/A
chr1	91318554	91319470	917	456	91319010	64	285.36	24.74	chr1	91319009	91319348	MLT1K	LTR	MaLR
chr1	91373858	91374402	545	370	91374228	20	106.11	17.87	chr1	91374002	91374512	MLT2B3	LTR	ERVL
chr1	91859352	91860045	694	345	91859697	31	97.3	10.31	chr1	91859527	91860075	MLT1L	LTR	MaLR
chr1	93246118	93247097	980	194	93246312	49	284.48	18.92	chr1	93246128	93246705	MLT1K	LTR	MaLR
chr1	93408633	93409254	622	347	93408980	37	252.48	27.33	chr1	93408238	93409560	LTR12C	LTR	ERV1
chr1	93418271	93419278	1008	405	93418676	134	102.17	6.29	N/A	N/A	N/A	N/A	N/A	N/A
chr1	94475654	94476199	546	158	94475812	30	102.2	11.73	chr1	94475808	94475845	GC_rich	Low_complexity	Low_complexity
chr1	94915864	94916316	453	215	94916079	19	108.08	15.03	chr1	94915951	94916120	MLT1K	LTR	MaLR
chr1	94973050	94973545	496	166	94973216	25	139.81	18.04	N/A	N/A	N/A	N/A	N/A	N/A
chr1	95515867	95516361	495	234	95516101	21	109.12	16.07	chr1	95515909	95516349	MLT1K	LTR	MaLR
chr1	95776364	95776880	517	358	95776722	27	175.16	15.77	chr1	95776144	95776819	LTR12	LTR	ERV1
chr1	96817501	96818412	912	444	96817945	104	948.67	83.04	chr1	96817858	96817999	MLT1I	LTR	MaLR
chr1	96965229	96966023	795	370	96965599	98	927.26	87.24	chr1	96965052	96966141	L1ME1	LINE	L1
chr1	97743793	97744510	718	298	97744091	33	106.43	11.92	N/A	N/A	N/A	N/A	N/A	N/A
chr1	98635991	98636839	849	468	98636459	41	243.48	30.48	N/A	N/A	N/A	N/A	N/A	N/A
chr1	98736249	98736800	552	159	98736408	28	160.58	21.65	chr1	98736040	98736468	LTR8A	LTR	ERV1
chr1	98899652	98899992	341	179	98899831	25	182.62	21.65	N/A	N/A	N/A	N/A	N/A	N/A
chr1	98926343	98926961	619	273	98926616	22	99.49	15.33	N/A	N/A	N/A	N/A	N/A	N/A
chr1	100487616	100488476	861	435	100488051	193	733.61	18.78	N/A	N/A	N/A	N/A	N/A	N/A
chr1	100819091	100819767	677	254	100819345	48	197.65	14.43	N/A	N/A	N/A	N/A	N/A	N/A
chr1	101134476	101135487	1012	462	101134938	89	99.31	6.49	N/A	N/A	N/A	N/A	N/A	N/A
chr1	101531441	101532115	675	355	101531796	62	138.22	8.12	N/A	N/A	N/A	N/A	N/A	N/A
chr1	101595384	101596005	622	386	101595770	63	102.52	7.78	N/A	N/A	N/A	N/A	N/A	N/A
chr1	103832570	103833012	443	180	103832750	74	306.81	12.19	N/A	N/A	N/A	N/A	N/A	N/A
chr1	104732220	104732793	574	206	104732426	44	342.02	33.64	chr1	104732357	104732782	LTR7Y	LTR	ERV1
chr1	105148228	105148976	749	288	105148516	26	127.46	17.87	chr1	105148396	105148813	MER57B	LTR	ERV1
chr1	105276858	105277589	732	341	105277199	24	113.68	17.87	chr1	105276540	105278349	MER52A	LTR	ERV1
chr1	105442063	105442548	486	160	105442223	27	162.18	14.9	chr1	105441701	105442391	LTR12_	LTR	ERV1
chr1	106302332	106302830	499	370	106302702	20	113.07	12.61	chr1	106302110	106302760	LTR12B	LTR	ERV1
chr1	108419224	108419686	463	156	108419380	26	137.97	15.87	chr1	108418848	108419745	L1MC3	LINE	L1
chr1	109741733	109742745	1013	424	109742157	258	2144.83	70.55	N/A	N/A	N/A	N/A	N/A	N/A
chr1	109770054	109771407	1354	603	109770657	455	2049.34	30.03	N/A	N/A	N/A	N/A	N/A	N/A
chr1	110682320	110684180	1861	787	110683107	1213	3100	17.21	N/A	N/A	N/A	N/A	N/A	N/A
chr1	110739620	110740036	417	277	110739897	21	137.17	18.92	chr1	110739563	110741048	LTR12C	LTR	ERV1
chr1	111307631	111309087	1457	710	111308341	451	1415.8	18.38	N/A	N/A	N/A	N/A	N/A	N/A
chr1	111793320	111794031	712	165	111793485	81	106.4	7.46	N/A	N/A	N/A	N/A	N/A	N/A
chr1	111813398	111814200	803	477	111813875	73	365.56	27.75	chr1	111813637	111813927	MLT1J2	LTR	MaLR
chr1	111849779	111850379	601	299	111850078	89	180.38	8.67	N/A	N/A	N/A	N/A	N/A	N/A
chr1	112083000	112084209	1210	619	112083619	348	1749.49	32.94	N/A	N/A	N/A	N/A	N/A	N/A
chr1	112739648	112741010	1363	611	112740259	342	1610.32	30.67	N/A	N/A	N/A	N/A	N/A	N/A
chr1	113048994	113049778	785	415	113049409	77	180.69	11.62	N/A	N/A	N/A	N/A	N/A	N/A
chr1	113301446	113302458	1013	360	113301806	365	2881.9	67.52	N/A	N/A	N/A	N/A	N/A	N/A
chr1	113375093	113375853	761	424	113375517	92	410.63	20.13	N/A	N/A	N/A	N/A	N/A	N/A
chr1	113416667	113417843	1177	619	113417286	214	403.46	13.85	N/A	N/A	N/A	N/A	N/A	N/A
chr1	113733966	113735083	1118	523	113734489	283	1838.45	45.1	N/A	N/A	N/A	N/A	N/A	N/A
chr1	114223278	114224022	745	329	114223607	51	202.48	14.88	N/A	N/A	N/A	N/A	N/A	N/A
chr1	114681398	114682196	799	392	114681790	35	119.08	10.95	chr1	114681722	114682104	LTR67	LTR	ERVL
chr1	114869110	114869636	527	158	114869268	26	112.34	13.31	chr1	114869255	114869375	MLT1J2	LTR	MaLR
chr1	115147085	115147685	601	354	115147439	31	196.81	24.18	chr1	115147159	115147575	MLT1H	LTR	MaLR
chr1	115414929	115415678	750	429	115415358	106	600.18	27.06	chr1	115415219	115415675	MLT1L	LTR	MaLR
chr1	116884190	116884936	747	371	116884561	66	103.56	7.24	N/A	N/A	N/A	N/A	N/A	N/A
chr1	117005615	117006364	750	400	117006015	135	1395.53	104.62	chr1	117005841	117006189	MLT1J	LTR	MaLR
chr1	117075347	117076214	868	473	117075820	48	173.08	16.54	chr1	117075681	117076058	MLT1K	LTR	MaLR
chr1	117138881	117139589	709	334	117139215	61	118.74	8.66	chr1	117139215	117139298	L1MC1	LINE	L1
chr1	117403729	117404959	1231	579	117404308	298	907.71	20.16	N/A	N/A	N/A	N/A	N/A	N/A
chr1	117465534	117466836	1303	473	117466007	368	1894.59	22.47	N/A	N/A	N/A	N/A	N/A	N/A
chr1	117495431	117495922	492	289	117495720	27	178.44	21.65	chr1	117495360	117495879	LTR12_	LTR	ERV1
chr1	117949528	117950343	816	518	117950046	83	234.29	11.27	N/A	N/A	N/A	N/A	N/A	N/A
chr1	118273343	118274338	996	466	118273809	145	321.81	12.83	N/A	N/A	N/A	N/A	N/A	N/A
chr1	118472811	118473508	698	242	118473053	50	371.86	39.94	N/A	N/A	N/A	N/A	N/A	N/A
chr1	118492161	118493025	865	351	118492512	39	191.6	14.6	chr1	118492358	118492834	LTR12_	LTR	ERV1
chr1	119484352	119485109	758	501	119484853	113	172.12	8.1	N/A	N/A	N/A	N/A	N/A	N/A
chr1	119711665	119712288	624	248	119711913	101	528.98	21.67	N/A	N/A	N/A	N/A	N/A	N/A
chr1	120055812	120056489	678	251	120056063	61	319.21	23.97	N/A	N/A	N/A	N/A	N/A	N/A
chr1	120057406	120058040	635	332	120057738	29	133.56	16.54	N/A	N/A	N/A	N/A	N/A	N/A
chr1	120962626	120963114	489	304	120962930	28	191.42	21.02	N/A	N/A	N/A	N/A	N/A	N/A
chr1	141479069	141481190	2122	1397	141480466	119	93.64	3.41	chr1	141480333	141480513	(GAATG)n	Satellite	Satellite
chr1	144093624	144093934	311	156	144093780	29	104.57	8.13	N/A	N/A	N/A	N/A	N/A	N/A
chr1	144149072	144150540	1469	685	144149757	416	1717.01	31.85	N/A	N/A	N/A	N/A	N/A	N/A
chr1	144166354	144167230	877	443	144166797	142	209.6	8.42	N/A	N/A	N/A	N/A	N/A	N/A
chr1	144181155	144182229	1075	619	144181774	322	1678.18	34.67	N/A	N/A	N/A	N/A	N/A	N/A
chr1	144187779	144188647	869	596	144188375	127	190.91	7.32	N/A	N/A	N/A	N/A	N/A	N/A
chr1	144218414	144219317	904	506	144218920	98	114.39	7.34	N/A	N/A	N/A	N/A	N/A	N/A
chr1	145456008	145456754	747	360	145456368	33	188	17.87	chr1	145455889	145456591	LTR12_	LTR	ERV1
chr1	147490993	147491466	474	206	147491199	57	140.22	8.72	N/A	N/A	N/A	N/A	N/A	N/A
chr1	148124656	148125276	621	325	148124981	243	1043.75	17.46	N/A	N/A	N/A	N/A	N/A	N/A
chr1	148125878	148126948	1071	399	148126277	254	711.28	14.93	N/A	N/A	N/A	N/A	N/A	N/A
chr1	148175606	148176409	804	363	148175969	54	187.27	17.64	N/A	N/A	N/A	N/A	N/A	N/A
chr1	148474492	148476016	1525	765	148475257	538	1971.69	25.17	N/A	N/A	N/A	N/A	N/A	N/A
chr1	148521074	148521658	585	328	148521402	58	133.83	9.4	N/A	N/A	N/A	N/A	N/A	N/A
chr1	148602479	148603471	993	664	148603143	124	185.7	8.9	N/A	N/A	N/A	N/A	N/A	N/A
chr1	148726059	148727023	965	385	148726444	305	1025.58	15.35	N/A	N/A	N/A	N/A	N/A	N/A
chr1	148754169	148755175	1007	562	148754731	247	1069.02	27.21	N/A	N/A	N/A	N/A	N/A	N/A
chr1	148867686	148869505	1820	671	148868357	889	3100	19.69	N/A	N/A	N/A	N/A	N/A	N/A
chr1	148935543	148937220	1678	911	148936454	699	3164.89	27.15	N/A	N/A	N/A	N/A	N/A	N/A
chr1	149370029	149370877	849	412	149370441	98	294.98	12.31	N/A	N/A	N/A	N/A	N/A	N/A
chr1	149385515	149386527	1013	364	149385879	161	460.23	16.23	N/A	N/A	N/A	N/A	N/A	N/A
chr1	149437084	149437837	754	497	149437581	154	385.61	13.29	N/A	N/A	N/A	N/A	N/A	N/A
chr1	149493379	149494990	1612	432	149493811	314	1088.58	31.12	N/A	N/A	N/A	N/A	N/A	N/A
chr1	149520287	149521963	1677	965	149521252	631	1854.33	15.7	N/A	N/A	N/A	N/A	N/A	N/A
chr1	149579615	149581216	1602	1060	149580675	223	830.82	23	chr1	149580537	149581004	MLT1K	LTR	MaLR
chr1	149585843	149587027	1185	580	149586423	284	856.46	17.83	N/A	N/A	N/A	N/A	N/A	N/A
chr1	149698448	149699320	873	177	149698625	223	882.77	20.08	N/A	N/A	N/A	N/A	N/A	N/A
chr1	150029039	150030358	1320	706	150029745	527	2259.5	21.83	N/A	N/A	N/A	N/A	N/A	N/A
chr1	150286747	150287625	879	520	150287267	162	390.51	11.05	N/A	N/A	N/A	N/A	N/A	N/A
chr1	151250392	151250915	524	119	151250511	27	173.69	23.12	chr1	151250063	151250857	LTR12	LTR	ERV1
chr1	151909705	151910868	1164	505	151910210	268	723.68	14.93	N/A	N/A	N/A	N/A	N/A	N/A
chr1	151966457	151967475	1019	530	151966987	208	486.44	13.63	N/A	N/A	N/A	N/A	N/A	N/A
chr1	152161622	152162942	1321	603	152162225	563	3177.22	34.83	N/A	N/A	N/A	N/A	N/A	N/A
chr1	152195471	152196191	721	465	152195936	64	151.34	9.9	N/A	N/A	N/A	N/A	N/A	N/A
chr1	152202176	152203265	1090	577	152202753	216	609.52	16.96	N/A	N/A	N/A	N/A	N/A	N/A
chr1	152206092	152207375	1284	816	152206908	484	2068.47	24.28	N/A	N/A	N/A	N/A	N/A	N/A
chr1	152321946	152322689	744	383	152322329	44	295.46	33.64	chr1	152321834	152322516	LTR12_	LTR	ERV1
chr1	152568608	152569310	703	317	152568925	73	372.16	22.39	N/A	N/A	N/A	N/A	N/A	N/A
chr1	152625604	152626360	757	328	152625932	38	232.88	22.07	N/A	N/A	N/A	N/A	N/A	N/A
chr1	152683870	152684730	861	416	152684286	48	114.89	10.01	N/A	N/A	N/A	N/A	N/A	N/A
chr1	153023944	153024671	728	376	153024320	64	301.43	20.57	N/A	N/A	N/A	N/A	N/A	N/A
chr1	153194810	153195645	836	489	153195299	119	258.85	10.69	N/A	N/A	N/A	N/A	N/A	N/A
chr1	153209607	153210342	736	326	153209933	57	183.6	12.68	N/A	N/A	N/A	N/A	N/A	N/A
chr1	153212616	153214417	1802	1031	153213647	575	1899.03	25.61	N/A	N/A	N/A	N/A	N/A	N/A
chr1	153221518	153223043	1526	809	153222327	436	1521.83	26.18	N/A	N/A	N/A	N/A	N/A	N/A
chr1	153240761	153241710	950	546	153241307	348	2272.92	42.93	N/A	N/A	N/A	N/A	N/A	N/A
chr1	153463419	153464646	1228	634	153464053	263	776.97	20.6	N/A	N/A	N/A	N/A	N/A	N/A
chr1	153480808	153481519	712	307	153481115	91	402.7	17.41	N/A	N/A	N/A	N/A	N/A	N/A
chr1	153498335	153499316	982	378	153498713	159	184.35	7.63	N/A	N/A	N/A	N/A	N/A	N/A
chr1	153544512	153545655	1144	578	153545090	296	536.7	11.29	N/A	N/A	N/A	N/A	N/A	N/A
chr1	153560247	153561332	1086	562	153560809	209	790.68	18.86	N/A	N/A	N/A	N/A	N/A	N/A
chr1	153846023	153846730	708	441	153846464	73	377.49	17.03	N/A	N/A	N/A	N/A	N/A	N/A
chr1	153953261	153954016	756	297	153953558	60	90.38	7.64	N/A	N/A	N/A	N/A	N/A	N/A
chr1	153981637	153982308	672	405	153982042	51	192.65	10.82	N/A	N/A	N/A	N/A	N/A	N/A
chr1	154390359	154391387	1029	503	154390862	127	175.05	10.36	N/A	N/A	N/A	N/A	N/A	N/A
chr1	154448721	154450104	1384	629	154449350	498	1676.94	20.81	N/A	N/A	N/A	N/A	N/A	N/A
chr1	154574084	154575542	1459	712	154574796	452	1127.53	15.99	N/A	N/A	N/A	N/A	N/A	N/A
chr1	154657785	154658669	885	442	154658227	78	237.76	16.93	N/A	N/A	N/A	N/A	N/A	N/A
chr1	154728377	154729301	925	436	154728813	90	145.69	10.17	N/A	N/A	N/A	N/A	N/A	N/A
chr1	154736698	154737900	1203	600	154737298	256	968.98	26.16	N/A	N/A	N/A	N/A	N/A	N/A
chr1	154741207	154742172	966	666	154741873	226	838.62	23.38	N/A	N/A	N/A	N/A	N/A	N/A
chr1	155476414	155476989	576	295	155476709	30	190.83	24.94	N/A	N/A	N/A	N/A	N/A	N/A
chr1	155794406	155795057	652	344	155794750	51	235.34	20.7	N/A	N/A	N/A	N/A	N/A	N/A
chr1	157248827	157249503	677	231	157249058	57	198.22	13.85	chr1	157248970	157249069	LTR10B1	LTR	ERV1
chr1	158016783	158017688	906	517	158017300	135	154.51	7.48	N/A	N/A	N/A	N/A	N/A	N/A
chr1	158075463	158076291	829	352	158075815	156	664.78	24.11	N/A	N/A	N/A	N/A	N/A	N/A
chr1	158306315	158307150	836	472	158306787	65	255.61	18.44	N/A	N/A	N/A	N/A	N/A	N/A
chr1	158521359	158521967	609	302	158521661	96	185.09	6.92	N/A	N/A	N/A	N/A	N/A	N/A
chr1	158589552	158590172	621	283	158589835	37	132.19	10.31	N/A	N/A	N/A	N/A	N/A	N/A
chr1	158603269	158603820	552	192	158603461	26	112.34	10.62	N/A	N/A	N/A	N/A	N/A	N/A
chr1	158914053	158914661	609	270	158914323	68	188.59	11.98	chr1	158914318	158914461	MLT1J2	LTR	MaLR
chr1	158979097	158980265	1169	779	158979876	78	127.66	7.86	N/A	N/A	N/A	N/A	N/A	N/A
chr1	159146560	159147151	592	266	159146826	24	133.4	18.92	chr1	159146314	159146948	LTR12_	LTR	ERV1
chr1	159256915	159258335	1421	715	159257630	544	3074.8	35.11	N/A	N/A	N/A	N/A	N/A	N/A
chr1	159395773	159396721	949	473	159396246	135	192.43	11.03	N/A	N/A	N/A	N/A	N/A	N/A
chr1	159402177	159403358	1182	586	159402763	292	827.69	19.01	N/A	N/A	N/A	N/A	N/A	N/A
chr1	159421484	159422515	1032	482	159421966	319	1345.83	23.39	N/A	N/A	N/A	N/A	N/A	N/A
chr1	159461631	159462795	1165	592	159462223	250	614.6	16.23	N/A	N/A	N/A	N/A	N/A	N/A
chr1	159494718	159495547	830	371	159495089	115	604.77	26.95	N/A	N/A	N/A	N/A	N/A	N/A
chr1	159603902	159604858	957	471	159604373	123	475.11	22.44	N/A	N/A	N/A	N/A	N/A	N/A
chr1	159741482	159742087	606	288	159741770	31	97.52	10.82	N/A	N/A	N/A	N/A	N/A	N/A
chr1	159975110	159976089	980	546	159975656	108	109.27	9.02	N/A	N/A	N/A	N/A	N/A	N/A
chr1	162158687	162159441	755	334	162159021	47	253.92	25.98	N/A	N/A	N/A	N/A	N/A	N/A
chr1	162794334	162795150	817	474	162794808	117	808.88	41.76	N/A	N/A	N/A	N/A	N/A	N/A
chr1	163833722	163834795	1074	445	163834167	120	163.03	9.15	N/A	N/A	N/A	N/A	N/A	N/A
chr1	164063269	164063999	731	191	164063460	116	263.99	11.43	N/A	N/A	N/A	N/A	N/A	N/A
chr1	164160506	164160949	444	213	164160719	70	311.19	14.19	N/A	N/A	N/A	N/A	N/A	N/A
chr1	164201751	164202301	551	162	164201913	28	127.5	14.58	chr1	164201817	164201919	L1MEd	LINE	L1
chr1	164725921	164726671	751	325	164726246	37	132.19	15.71	N/A	N/A	N/A	N/A	N/A	N/A
chr1	165957080	165958338	1259	716	165957796	346	1483.83	27.53	N/A	N/A	N/A	N/A	N/A	N/A
chr1	166134911	166136042	1132	484	166135395	219	1393.84	47.88	N/A	N/A	N/A	N/A	N/A	N/A
chr1	166406223	166407034	812	427	166406650	53	124.36	11.42	N/A	N/A	N/A	N/A	N/A	N/A
chr1	166771280	166771884	605	389	166771669	27	91.8	10.91	N/A	N/A	N/A	N/A	N/A	N/A
chr1	166793276	166793898	623	331	166793607	34	91.97	9.74	N/A	N/A	N/A	N/A	N/A	N/A
chr1	166808169	166808955	787	464	166808633	117	683.28	27.06	chr1	166807848	166808644	L2	LINE	L2
chr1	167341595	167342470	876	482	167342077	83	184.78	9.62	N/A	N/A	N/A	N/A	N/A	N/A
chr1	167603290	167604451	1162	405	167603695	241	616.07	14.54	N/A	N/A	N/A	N/A	N/A	N/A
chr1	167721385	167722563	1179	523	167721908	263	638.81	16.33	N/A	N/A	N/A	N/A	N/A	N/A
chr1	168129387	168130643	1257	711	168130098	249	410.57	10.82	N/A	N/A	N/A	N/A	N/A	N/A
chr1	168312327	168313322	996	637	168312964	68	276.17	14.72	chr1	168312690	168313008	LTR12	LTR	ERV1
chr1	168767292	168768412	1121	584	168767876	173	179.67	9.18	N/A	N/A	N/A	N/A	N/A	N/A
chr1	169616814	169617162	349	193	169617007	19	131.9	18.92	chr1	169616643	169618006	LTR12C	LTR	ERV1
chr1	170016540	170018022	1483	828	170017368	459	1597.43	20.51	N/A	N/A	N/A	N/A	N/A	N/A
chr1	170767694	170769344	1651	550	170768244	368	772.95	12.71	N/A	N/A	N/A	N/A	N/A	N/A
chr1	171650394	171651139	746	443	171650837	67	143.41	10.54	chr1	171650615	171650979	MER31B	LTR	ERV1
chr1	172059818	172060809	992	528	172060346	205	378.55	10.66	N/A	N/A	N/A	N/A	N/A	N/A
chr1	172593849	172594333	485	283	172594132	23	124.47	16.32	chr1	172593869	172594443	MER101B	LTR	ERV1
chr1	173034946	173035819	874	427	173035373	153	427.63	15.63	N/A	N/A	N/A	N/A	N/A	N/A
chr1	173225720	173226901	1182	582	173226302	269	1563.62	45.46	N/A	N/A	N/A	N/A	N/A	N/A
chr1	173522927	173523714	788	406	173523333	45	118.31	12.27	chr1	173523171	173523547	MER57A	LTR	ERV1
chr1	175406275	175406955	681	356	175406631	76	518.71	37.88	N/A	N/A	N/A	N/A	N/A	N/A
chr1	177261116	177261994	879	453	177261569	59	96.65	9.47	chr1	177261549	177261571	GC_rich	Low_complexity	Low_complexity
chr1	177317150	177318285	1136	616	177317766	284	869.02	16.9	N/A	N/A	N/A	N/A	N/A	N/A
chr1	177440992	177441594	603	220	177441212	40	200.55	21.05	chr1	177441082	177441360	MLT1I	LTR	MaLR
chr1	177529072	177529962	891	403	177529475	116	230.06	10.96	N/A	N/A	N/A	N/A	N/A	N/A
chr1	178119286	178120035	750	425	178119711	84	202.85	12.27	N/A	N/A	N/A	N/A	N/A	N/A
chr1	178448896	178449899	1004	449	178449345	151	689.2	25.77	N/A	N/A	N/A	N/A	N/A	N/A
chr1	179269203	179270219	1017	474	179269677	205	637.95	19.46	N/A	N/A	N/A	N/A	N/A	N/A
chr1	179274089	179274554	466	203	179274292	65	153.63	8.13	N/A	N/A	N/A	N/A	N/A	N/A
chr1	179306117	179307018	902	452	179306569	107	703.44	46.1	chr1	179306521	179306910	MLT1L	LTR	MaLR
chr1	179323827	179324816	990	526	179324353	268	1070.21	24.51	N/A	N/A	N/A	N/A	N/A	N/A
chr1	179720743	179721514	772	401	179721144	50	93.13	6.96	N/A	N/A	N/A	N/A	N/A	N/A
chr1	179740102	179741034	933	439	179740541	107	255.99	13.64	N/A	N/A	N/A	N/A	N/A	N/A
chr1	180627087	180628219	1133	509	180627596	237	824.5	24.01	chr1	180627579	180627602	GC_rich	Low_complexity	Low_complexity
chr1	180787547	180787997	451	294	180787841	21	97.83	13.44	chr1	180787518	180787843	MER7A	DNA	MER2_type
chr1	180839636	180840740	1105	567	180840203	185	532.98	17.32	N/A	N/A	N/A	N/A	N/A	N/A
chr1	181511896	181512478	583	160	181512056	34	139.61	12.09	N/A	N/A	N/A	N/A	N/A	N/A
chr1	181707051	181708151	1101	558	181707609	188	389.09	13.34	N/A	N/A	N/A	N/A	N/A	N/A
chr1	181869217	181870077	861	389	181869606	85	128.95	7.52	N/A	N/A	N/A	N/A	N/A	N/A
chr1	182178571	182179215	645	251	182178822	28	98.22	13.38	N/A	N/A	N/A	N/A	N/A	N/A
chr1	182990159	182991398	1240	567	182990726	411	1070.13	16.81	N/A	N/A	N/A	N/A	N/A	N/A
chr1	183392309	183393264	956	432	183392741	126	109.76	7.92	N/A	N/A	N/A	N/A	N/A	N/A
chr1	183551558	183552501	944	457	183552015	237	1471.28	42.81	N/A	N/A	N/A	N/A	N/A	N/A
chr1	184327040	184327562	523	206	184327246	21	105.46	11.73	N/A	N/A	N/A	N/A	N/A	N/A
chr1	184419582	184420276	695	306	184419888	93	844.02	61.6	N/A	N/A	N/A	N/A	N/A	N/A
chr1	184609801	184610424	624	403	184610204	57	125.11	10.42	N/A	N/A	N/A	N/A	N/A	N/A
chr1	185652917	185653914	998	538	185653455	168	1791.03	145.05	chr1	185653408	185653620	MLT1H	LTR	MaLR
chr1	185711037	185711676	640	396	185711433	36	238.04	28.38	chr1	185711397	185711618	MLT1K	LTR	MaLR
chr1	186325046	186325727	682	379	186325425	23	112.08	15.77	N/A	N/A	N/A	N/A	N/A	N/A
chr1	189132750	189133597	848	463	189133213	70	319.31	25.71	chr1	189133128	189133252	MLT1H	LTR	MaLR
chr1	189931375	189932108	734	367	189931742	33	167.86	20.3	chr1	189931137	189931758	MER21B	LTR	ERV1
chr1	190844606	190845620	1015	537	190845143	216	826.87	21.65	chr1	190844796	190845274	LTR67	LTR	ERVL
chr1	191147197	191147537	341	219	191147416	20	121.87	15.23	chr1	191147382	191148130	LTR12_	LTR	ERV1
chr1	191198906	191199463	558	253	191199159	27	91.8	8.56	chr1	191198998	191199358	MER93a	LTR	ERV1
chr1	191714748	191715540	793	390	191715138	40	137.94	12.37	N/A	N/A	N/A	N/A	N/A	N/A
chr1	192852816	192853207	392	156	192852972	17	104	16.82	chr1	192852499	192853464	LTR12	LTR	ERV1
chr1	195381726	195383038	1313	759	195382485	521	2666.84	32.59	N/A	N/A	N/A	N/A	N/A	N/A
chr1	196392675	196393956	1282	743	196393418	234	961.23	26.58	N/A	N/A	N/A	N/A	N/A	N/A
chr1	196394394	196395331	938	514	196394908	96	164.41	10.35	N/A	N/A	N/A	N/A	N/A	N/A
chr1	196421348	196421926	579	273	196421621	38	138.91	10.03	N/A	N/A	N/A	N/A	N/A	N/A
chr1	196434762	196435220	459	294	196435056	38	95.95	8.28	chr1	196434845	196435186	LTR16A	LTR	ERVL
chr1	196640264	196640827	564	164	196640428	31	202.3	18.55	chr1	196640420	196641161	LTR12	LTR	ERV1
chr1	196834274	196835226	953	413	196834687	114	203.21	11.24	chr1	196834430	196834706	MLT1I	LTR	MaLR
chr1	197172781	197173800	1020	442	197173223	263	1528.93	36.71	N/A	N/A	N/A	N/A	N/A	N/A
chr1	197407735	197408640	906	404	197408139	231	1448.66	41.37	chr1	197408071	197408159	MLT1J1	LTR	MaLR
chr1	198855920	198857137	1218	605	198856525	397	1794.3	26.82	N/A	N/A	N/A	N/A	N/A	N/A
chr1	198898783	198899512	730	266	198899049	37	132.19	13.69	N/A	N/A	N/A	N/A	N/A	N/A
chr1	199121170	199122055	886	261	199121431	77	324.41	14.9	N/A	N/A	N/A	N/A	N/A	N/A
chr1	199144744	199145476	733	332	199145076	25	96.34	13.63	N/A	N/A	N/A	N/A	N/A	N/A
chr1	199254862	199255933	1072	489	199255351	162	395.14	15.82	N/A	N/A	N/A	N/A	N/A	N/A
chr1	199264044	199264718	675	405	199264449	64	309.37	20.56	chr1	199264312	199264475	MLT1I	LTR	MaLR
chr1	199389648	199390605	958	612	199390260	263	943.39	20.01	N/A	N/A	N/A	N/A	N/A	N/A
chr1	199689483	199690613	1131	484	199689967	255	1884.15	67.83	chr1	199689874	199690093	MLT1F2	LTR	MaLR
chr1	199954387	199954995	609	343	199954730	33	143.33	16.84	N/A	N/A	N/A	N/A	N/A	N/A
chr1	200182004	200182673	670	330	200182334	34	138.99	13.23	N/A	N/A	N/A	N/A	N/A	N/A
chr1	200190886	200191697	812	288	200191174	265	1071.58	18.52	N/A	N/A	N/A	N/A	N/A	N/A
chr1	200274374	200274909	536	281	200274655	29	127.5	15.47	chr1	200274552	200274781	L1MB3	LINE	L1
chr1	200531157	200531865	709	267	200531424	37	90.67	10.23	N/A	N/A	N/A	N/A	N/A	N/A
chr1	200577222	200578379	1158	568	200577790	345	1535.63	28.35	N/A	N/A	N/A	N/A	N/A	N/A
chr1	200680593	200681075	483	323	200680916	20	103.59	13.53	N/A	N/A	N/A	N/A	N/A	N/A
chr1	201046092	201047109	1018	529	201046621	139	490.6	20.59	N/A	N/A	N/A	N/A	N/A	N/A
chr1	201096878	201098007	1130	550	201097428	243	1750.28	61.33	N/A	N/A	N/A	N/A	N/A	N/A
chr1	201242513	201243587	1075	521	201243034	362	1440.92	24.95	N/A	N/A	N/A	N/A	N/A	N/A
chr1	201506540	201507414	875	434	201506974	80	212.04	15.9	chr1	201506848	201507087	MLT1J	LTR	MaLR
chr1	201556431	201557272	842	462	201556893	127	245.02	11.17	N/A	N/A	N/A	N/A	N/A	N/A
chr1	201562535	201563711	1177	669	201563204	151	216.7	12.34	N/A	N/A	N/A	N/A	N/A	N/A
chr1	201848728	201849402	675	387	201849115	32	100.3	10.71	chr1	201849114	201849263	MLT1K	LTR	MaLR
chr1	202136379	202137135	757	330	202136709	26	126.4	19.97	chr1	202135802	202137114	LTR12C	LTR	ERV1
chr1	202647158	202648134	977	549	202647707	100	204.14	11.81	N/A	N/A	N/A	N/A	N/A	N/A
chr1	202801365	202802002	638	331	202801696	83	203.21	10.35	N/A	N/A	N/A	N/A	N/A	N/A
chr1	203463019	203464115	1097	600	203463619	253	1362.84	40.32	N/A	N/A	N/A	N/A	N/A	N/A
chr1	203557078	203558082	1005	457	203557535	202	1136.6	33.76	N/A	N/A	N/A	N/A	N/A	N/A
chr1	203985633	203986685	1053	448	203986081	195	530.54	15.18	N/A	N/A	N/A	N/A	N/A	N/A
chr1	204048476	204049616	1141	538	204049014	235	1068.96	30.38	N/A	N/A	N/A	N/A	N/A	N/A
chr1	204153023	204153649	627	342	204153365	33	106.43	9.95	N/A	N/A	N/A	N/A	N/A	N/A
chr1	204304692	204305070	379	214	204304906	21	145.4	17.87	N/A	N/A	N/A	N/A	N/A	N/A
chr1	204743318	204744493	1176	448	204743766	99	167.93	7.03	N/A	N/A	N/A	N/A	N/A	N/A
chr1	204802578	204803785	1208	554	204803132	380	1537.27	25.58	chr1	204803052	204803243	MLT1J2	LTR	MaLR
chr1	205009102	205010112	1011	528	205009630	192	608.07	14.01	N/A	N/A	N/A	N/A	N/A	N/A
chr1	205884804	205885430	627	212	205885016	75	351.31	22.62	N/A	N/A	N/A	N/A	N/A	N/A
chr1	205991371	205992370	1000	581	205991952	270	1109.6	22.16	N/A	N/A	N/A	N/A	N/A	N/A
chr1	206061927	206063153	1227	866	206062793	315	876.78	19.06	N/A	N/A	N/A	N/A	N/A	N/A
chr1	207281854	207282289	436	153	207282007	25	117.79	11.42	chr1	207282007	207282355	MLT1I	LTR	MaLR
chr1	207640593	207641111	519	188	207640781	19	90.16	9.92	chr1	207640448	207641187	MER21C	LTR	ERV1
chr1	209500419	209501356	938	499	209500918	95	184.62	10.65	N/A	N/A	N/A	N/A	N/A	N/A
chr1	209818798	209819766	969	475	209819273	149	453.89	17.05	N/A	N/A	N/A	N/A	N/A	N/A
chr1	209915129	209916187	1059	509	209915638	245	1128.21	24.4	N/A	N/A	N/A	N/A	N/A	N/A
chr1	210275161	210276146	986	489	210275650	110	95.35	8.04	N/A	N/A	N/A	N/A	N/A	N/A
chr1	210477575	210478089	515	171	210477746	25	102.27	12.03	chr1	210477517	210477881	MSTC	LTR	MaLR
chr1	210524186	210525811	1626	940	210525126	477	1084.8	14.01	N/A	N/A	N/A	N/A	N/A	N/A
chr1	211189728	211191087	1360	723	211190451	318	1268.22	29.73	N/A	N/A	N/A	N/A	N/A	N/A
chr1	211310244	211310902	659	373	211310617	77	290.12	17.27	chr1	211310395	211310794	MER57A	LTR	ERV1
chr1	211346244	211346816	573	163	211346407	27	94.28	12.2	chr1	211346394	211346495	MLT1L	LTR	MaLR
chr1	211775561	211776008	448	286	211775847	29	196.98	21.28	chr1	211775578	211775992	MLT1L	LTR	MaLR
chr1	211924454	211925002	549	162	211924616	28	150.71	18.86	chr1	211924463	211924991	MLT1K	LTR	MaLR
chr1	212842506	212843572	1067	612	212843118	370	1805.68	29.24	N/A	N/A	N/A	N/A	N/A	N/A
chr1	215586390	215587121	732	356	215586746	33	121.33	11.42	chr1	215586637	215587059	MLT1J2	LTR	MaLR
chr1	216924662	216925192	531	331	216924993	20	104.42	16.03	N/A	N/A	N/A	N/A	N/A	N/A
chr1	217467942	217468553	612	284	217468226	47	127.22	8.56	chr1	217467794	217468358	MLT1L	LTR	MaLR
chr1	218333311	218334368	1058	478	218333789	68	126.51	7.22	chr1	218333661	218333865	MER33	DNA	MER1_type
chr1	218543849	218544426	578	419	218544268	20	101.53	15.77	chr1	218543804	218545350	L1MEc	LINE	L1
chr1	218583678	218584202	525	320	218583998	40	229.54	15.78	chr1	218583837	218584084	MLT1H	LTR	MaLR
chr1	218608373	218609022	650	376	218608749	51	186.72	12.27	N/A	N/A	N/A	N/A	N/A	N/A
chr1	218688212	218688708	497	206	218688418	26	169.53	25.23	chr1	218688322	218688474	MLT1J	LTR	MaLR
chr1	219118836	219119519	684	432	219119268	64	345.78	27.14	N/A	N/A	N/A	N/A	N/A	N/A
chr1	219816185	219816638	454	289	219816474	24	106.37	12.63	chr1	219816254	219816623	MER57A	LTR	ERV1
chr1	219981528	219982808	1281	622	219982150	560	2122.85	20.03	N/A	N/A	N/A	N/A	N/A	N/A
chr1	220857110	220857963	854	546	220857656	234	1146.82	24.47	N/A	N/A	N/A	N/A	N/A	N/A
chr1	220883655	220884684	1030	492	220884147	127	145.49	7.64	N/A	N/A	N/A	N/A	N/A	N/A
chr1	221279719	221280261	543	165	221279884	26	112.34	13.71	chr1	221279865	221280010	MLT1I	LTR	MaLR
chr1	221484379	221485125	747	427	221484806	36	103.28	8.53	N/A	N/A	N/A	N/A	N/A	N/A
chr1	221604067	221604834	768	439	221604506	53	384.84	48.35	N/A	N/A	N/A	N/A	N/A	N/A
chr1	222142214	222143086	873	416	222142630	66	498.51	57.81	N/A	N/A	N/A	N/A	N/A	N/A
chr1	222987344	222988109	766	377	222987721	65	176.79	7.47	N/A	N/A	N/A	N/A	N/A	N/A
chr1	223681896	223683134	1239	584	223682480	422	2988.96	56.99	N/A	N/A	N/A	N/A	N/A	N/A
chr1	223686603	223686977	375	161	223686764	30	161.97	14.86	chr1	223685507	223687069	LTR12C	LTR	ERV1
chr1	224031744	224032634	891	332	224032076	183	301.76	10.2	N/A	N/A	N/A	N/A	N/A	N/A
chr1	224151243	224152003	761	487	224151730	86	180.63	11.14	N/A	N/A	N/A	N/A	N/A	N/A
chr1	224178198	224179138	941	471	224178669	168	534.37	20.22	N/A	N/A	N/A	N/A	N/A	N/A
chr1	224316649	224317524	876	378	224317027	132	572.37	20.44	N/A	N/A	N/A	N/A	N/A	N/A
chr1	224320598	224321661	1064	593	224321191	213	1459.11	46.33	N/A	N/A	N/A	N/A	N/A	N/A
chr1	224574969	224575768	800	574	224575543	81	704.14	54.66	chr1	224575272	224575827	LTR12_	LTR	ERV1
chr1	224679967	224680637	671	306	224680273	31	129.44	16.03	chr1	224679900	224681180	LTR12C	LTR	ERV1
chr1	224704067	224704791	725	311	224704378	45	282.84	31.57	N/A	N/A	N/A	N/A	N/A	N/A
chr1	224718765	224719223	459	331	224719096	18	101.86	14.72	chr1	224718347	224719458	LTR12D	LTR	ERV1
chr1	224808062	224808694	633	368	224808430	77	428.22	27.26	chr1	224808349	224808679	MLT1I	LTR	MaLR
chr1	225163244	225163718	475	181	225163425	20	101.1	14.6	chr1	225163123	225163494	MLT1L	LTR	MaLR
chr1	225193747	225195141	1395	718	225194465	499	1989.36	25.54	N/A	N/A	N/A	N/A	N/A	N/A
chr1	225817284	225818405	1122	558	225817842	184	430.77	13.68	N/A	N/A	N/A	N/A	N/A	N/A
chr1	226375357	226376144	788	461	226375818	37	195.34	26.16	chr1	226375507	226375930	MER57B	LTR	ERV1
chr1	226660632	226661870	1239	611	226661243	241	747.25	22.45	N/A	N/A	N/A	N/A	N/A	N/A
chr1	226679529	226680006	478	222	226679751	31	200.66	21.56	N/A	N/A	N/A	N/A	N/A	N/A
chr1	226711790	226712709	920	516	226712306	280	1117.06	22.35	N/A	N/A	N/A	N/A	N/A	N/A
chr1	226718789	226719535	747	285	226719074	155	923.42	29.38	N/A	N/A	N/A	N/A	N/A	N/A
chr1	228038428	228039189	762	339	228038767	32	157.59	16.23	chr1	228038637	228039054	MER57A	LTR	ERV1
chr1	228268730	228269852	1123	668	228269398	192	565.76	20.06	N/A	N/A	N/A	N/A	N/A	N/A
chr1	229520026	229520514	489	246	229520272	21	123.66	18.92	chr1	229519654	229520563	LTR12D	LTR	ERV1
chr1	230832035	230833277	1243	568	230832603	353	3100	112.61	N/A	N/A	N/A	N/A	N/A	N/A
chr1	231332003	231332441	439	188	231332191	19	114.1	17.87	chr1	231331318	231332662	LTR12C	LTR	ERV1
chr1	231598288	231598797	510	353	231598641	28	144.83	12.27	N/A	N/A	N/A	N/A	N/A	N/A
chr1	231815473	231816428	956	434	231815907	157	784.49	31.84	N/A	N/A	N/A	N/A	N/A	N/A
chr1	231926429	231927057	629	374	231926803	37	214.1	26.24	chr1	231926438	231927255	LTR12D	LTR	ERV1
chr1	233043875	233044858	984	495	233044370	95	126.94	8.23	N/A	N/A	N/A	N/A	N/A	N/A
chr1	233177207	233178365	1159	607	233177814	275	1490.88	36.7	N/A	N/A	N/A	N/A	N/A	N/A
chr1	233557776	233558715	940	527	233558303	95	95.62	7.82	N/A	N/A	N/A	N/A	N/A	N/A
chr1	234096577	234097598	1022	493	234097070	200	679.86	20.06	N/A	N/A	N/A	N/A	N/A	N/A
chr1	234113226	234114027	802	422	234113648	64	119.1	8.89	N/A	N/A	N/A	N/A	N/A	N/A
chr1	234372255	234372818	564	165	234372420	46	95.85	7.64	N/A	N/A	N/A	N/A	N/A	N/A
chr1	234676584	234677093	510	314	234676898	27	162.18	18.4	chr1	234676843	234676931	L2	LINE	L2
chr1	235024420	235025738	1319	751	235025171	356	680.52	14.56	N/A	N/A	N/A	N/A	N/A	N/A
chr1	235943652	235944204	553	289	235943941	43	327.99	26.93	N/A	N/A	N/A	N/A	N/A	N/A
chr1	236029551	236030258	708	306	236029857	38	95.95	8.03	N/A	N/A	N/A	N/A	N/A	N/A
chr1	236093117	236093620	504	213	236093330	20	100.29	12.63	N/A	N/A	N/A	N/A	N/A	N/A
chr1	236471862	236472471	610	308	236472170	22	113.61	15.77	chr1	236472125	236472290	L2	LINE	L2
chr1	236500651	236501179	529	189	236500840	48	306.25	27.36	N/A	N/A	N/A	N/A	N/A	N/A
chr1	238207355	238207852	498	214	238207569	40	320.59	36.79	chr1	238207435	238207677	MLT1J2	LTR	MaLR
chr1	239749259	239750351	1093	537	239749796	230	1111.31	32.07	N/A	N/A	N/A	N/A	N/A	N/A
chr1	242277600	242278645	1046	664	242278264	261	774.02	14.53	N/A	N/A	N/A	N/A	N/A	N/A
chr1	242554717	242555563	847	384	242555101	116	688.18	39.69	chr1	242554959	242555330	MER57A	LTR	ERV1
chr1	243228555	243229283	729	265	243228820	51	373.95	32.58	chr1	243228730	243228890	LTR67	LTR	ERVL
chr1	244795802	244796865	1064	467	244796269	207	509.34	15.52	N/A	N/A	N/A	N/A	N/A	N/A
chr1	244928719	244929621	903	476	244929195	103	190.12	12.44	N/A	N/A	N/A	N/A	N/A	N/A
chr1	244942430	244942740	311	156	244942586	16	115.58	16.82	chr1	244942184	244943038	LTR12	LTR	ERV1
chr1	245123019	245123816	798	207	245123226	101	642.07	26.87	N/A	N/A	N/A	N/A	N/A	N/A
chr1	245160686	245161320	635	331	245161017	45	99.64	7.38	N/A	N/A	N/A	N/A	N/A	N/A
chr1	245237707	245238592	886	321	245238028	174	1185.81	43.33	N/A	N/A	N/A	N/A	N/A	N/A
chr1	245308473	245309229	757	297	245308770	70	96.51	7.67	N/A	N/A	N/A	N/A	N/A	N/A
chr1	245333702	245334760	1059	655	245334357	290	1125.7	26.86	N/A	N/A	N/A	N/A	N/A	N/A
chr1	245440348	245441294	947	478	245440826	186	936.97	32.47	N/A	N/A	N/A	N/A	N/A	N/A
chr1	246518251	246518731	481	259	246518510	17	90.09	14.72	chr1	246518111	246518771	L1MD2	LINE	L1
chr1	247098185	247100284	2100	720	247098905	569	1668.64	18.96	N/A	N/A	N/A	N/A	N/A	N/A
chr10	486911	487642	732	434	487345	45	228.42	24.72	N/A	N/A	N/A	N/A	N/A	N/A
chr10	655779	656116	338	196	655975	22	132.21	15.15	N/A	N/A	N/A	N/A	N/A	N/A
chr10	967333	968179	847	428	967761	131	472.19	19.67	N/A	N/A	N/A	N/A	N/A	N/A
chr10	1084292	1085871	1580	653	1084945	501	1532.74	17.96	N/A	N/A	N/A	N/A	N/A	N/A
chr10	1091927	1092612	686	405	1092332	43	91.11	7.77	N/A	N/A	N/A	N/A	N/A	N/A
chr10	1353030	1353599	570	262	1353292	25	133.44	18.5	N/A	N/A	N/A	N/A	N/A	N/A
chr10	1558467	1559132	666	299	1558766	46	208.29	18.55	chr10	1558554	1558958	MSTB1	LTR	MaLR
chr10	1580693	1581189	497	334	1581027	23	140.67	22.07	N/A	N/A	N/A	N/A	N/A	N/A
chr10	1769344	1770247	904	431	1769775	70	117.05	9.62	N/A	N/A	N/A	N/A	N/A	N/A
chr10	2792740	2793392	653	243	2792983	23	115.92	11.56	chr10	2792886	2793461	MER51A	LTR	ERV1
chr10	3021602	3022200	599	328	3021930	52	373.98	31.16	N/A	N/A	N/A	N/A	N/A	N/A
chr10	3046289	3046816	528	272	3046561	21	100.75	15.46	chr10	3045971	3046792	L1MC5	LINE	L1
chr10	3204606	3205647	1042	434	3205040	140	345.97	16.47	N/A	N/A	N/A	N/A	N/A	N/A
chr10	3674006	3674745	740	354	3674360	35	151.95	17.34	chr10	3674139	3674686	MLT1K	LTR	MaLR
chr10	3816985	3818202	1218	689	3817674	330	1313.98	28.74	N/A	N/A	N/A	N/A	N/A	N/A
chr10	5444069	5444887	819	420	5444489	91	241.52	13.2	N/A	N/A	N/A	N/A	N/A	N/A
chr10	5891361	5892146	786	393	5891754	98	494.58	29.83	N/A	N/A	N/A	N/A	N/A	N/A
chr10	5895146	5895958	813	347	5895493	246	1776.58	46.39	N/A	N/A	N/A	N/A	N/A	N/A
chr10	5944873	5945787	915	450	5945323	77	362.17	30.06	chr10	5945310	5945868	LTR12B	LTR	ERV1
chr10	5971666	5972613	948	423	5972089	179	378.5	12.23	N/A	N/A	N/A	N/A	N/A	N/A
chr10	6135999	6136847	849	569	6136568	53	95.72	7.15	N/A	N/A	N/A	N/A	N/A	N/A
chr10	7325564	7326456	893	383	7325947	56	143.38	11.15	N/A	N/A	N/A	N/A	N/A	N/A
chr10	7616266	7616788	523	331	7616597	26	136.3	16.84	N/A	N/A	N/A	N/A	N/A	N/A
chr10	7739373	7739921	549	359	7739732	19	97.26	14.72	chr10	7739645	7740013	MLT1I	LTR	MaLR
chr10	8070815	8071586	772	348	8071163	91	488.79	29.05	chr10	8071100	8071271	MLT1K	LTR	MaLR
chr10	8134933	8135941	1009	581	8135514	105	346.92	17.78	N/A	N/A	N/A	N/A	N/A	N/A
chr10	8203158	8203632	475	241	8203399	17	90.93	13.66	chr10	8203334	8203663	L2	LINE	L2
chr10	8424268	8424768	501	161	8424429	31	219.69	28.38	chr10	8424372	8424649	MLT1J2	LTR	MaLR
chr10	11260264	11261201	938	526	11260790	214	729.8	19.16	N/A	N/A	N/A	N/A	N/A	N/A
chr10	11719899	11720604	706	399	11720298	78	421.81	27.17	chr10	11720076	11720636	LTR67	LTR	ERVL
chr10	12150358	12151386	1029	563	12150921	300	1354.42	22.98	N/A	N/A	N/A	N/A	N/A	N/A
chr10	12391740	12392435	696	425	12392165	29	160.71	25.23	chr10	12391399	12392201	LTR12	LTR	ERV1
chr10	13184083	13184630	548	356	13184439	44	129.79	11.01	N/A	N/A	N/A	N/A	N/A	N/A
chr10	13242963	13244171	1209	516	13243479	258	817.05	20.65	N/A	N/A	N/A	N/A	N/A	N/A
chr10	13472413	13472977	565	411	13472824	30	111.49	13.25	chr10	13472534	13472968	MER101	LTR	ERV1
chr10	14042348	14043213	866	472	14042820	40	167.81	16.65	chr10	14042721	14043057	MLT1J2	LTR	MaLR
chr10	14630224	14630932	709	421	14630645	53	223.94	18.04	N/A	N/A	N/A	N/A	N/A	N/A
chr10	14919566	14920649	1084	520	14920086	343	1290.42	20.54	N/A	N/A	N/A	N/A	N/A	N/A
chr10	15035389	15036780	1392	778	15036167	443	2133.62	29.93	N/A	N/A	N/A	N/A	N/A	N/A
chr10	15166461	15166944	484	331	15166792	23	126.83	12.32	chr10	15166421	15167015	MER51A	LTR	ERV1
chr10	15170262	15171379	1118	596	15170858	205	848.01	26.39	N/A	N/A	N/A	N/A	N/A	N/A
chr10	17108971	17109600	630	268	17109239	26	107.66	15.87	chr10	17109189	17109419	L1ME4a	LINE	L1
chr10	17729804	17730911	1108	370	17730174	83	285.83	13.62	chr10	17730159	17730637	LTR12B	LTR	ERV1
chr10	18373792	18374496	705	354	18374146	26	118.34	11.73	N/A	N/A	N/A	N/A	N/A	N/A
chr10	18463518	18464407	890	458	18463976	57	203.89	14.43	chr10	18463855	18464174	MLT1J1	LTR	MaLR
chr10	18747436	18748010	575	237	18747673	20	101.93	14.72	chr10	18747369	18747691	MER57B	LTR	ERV1
chr10	18915556	18916136	581	290	18915846	20	93.1	12.61	chr10	18915183	18915950	LTR12_	LTR	ERV1
chr10	20287786	20288246	461	139	20287925	19	91.85	10.66	N/A	N/A	N/A	N/A	N/A	N/A
chr10	20656779	20657463	685	249	20657028	28	153.67	19.97	chr10	20656848	20657261	MER57A	LTR	ERV1
chr10	21846089	21846671	583	164	21846253	41	181.8	16.58	N/A	N/A	N/A	N/A	N/A	N/A
chr10	22929888	22930876	989	480	22930368	100	144.86	10.25	N/A	N/A	N/A	N/A	N/A	N/A
chr10	23151893	23152527	635	239	23152132	42	248.14	25.96	chr10	23151931	23152157	MIRb	SINE	MIR
chr10	24538122	24539033	912	459	24538581	94	389.22	22.96	N/A	N/A	N/A	N/A	N/A	N/A
chr10	24706842	24707640	799	400	24707242	53	162.77	14.07	N/A	N/A	N/A	N/A	N/A	N/A
chr10	25106706	25107238	533	243	25106949	44	339.3	31.73	chr10	25106890	25107051	MLT1I	LTR	MaLR
chr10	27235344	27235881	538	387	27235731	21	115.69	17.87	chr10	27234307	27236051	LTR12C	LTR	ERV1
chr10	27586280	27586538	259	130	27586410	20	201.36	21.02	chr10	27585226	27586868	LTR12C	LTR	ERV1
chr10	28631588	28632824	1237	554	28632142	405	2385.08	42.26	N/A	N/A	N/A	N/A	N/A	N/A
chr10	29006029	29006677	649	353	29006382	189	1197.49	33.21	chr10	29006378	29006410	(CGGGG)n	Simple_repeat	Simple_repeat
chr10	29309288	29309579	292	147	29309435	17	106.74	12.27	N/A	N/A	N/A	N/A	N/A	N/A
chr10	30408236	30408957	722	337	30408573	44	300.79	38.89	N/A	N/A	N/A	N/A	N/A	N/A
chr10	30894492	30895036	545	191	30894683	30	198.93	24.18	chr10	30894314	30894839	LTR71B	LTR	ERV1
chr10	31916108	31916774	667	287	31916395	34	179.21	20.5	chr10	31915887	31916757	LTR12D	LTR	ERV1
chr10	32082862	32083379	518	280	32083142	51	292.52	23.55	chr10	32083040	32083155	MER5B	DNA	MER1_type
chr10	32087790	32088473	684	363	32088153	90	494.82	25.03	N/A	N/A	N/A	N/A	N/A	N/A
chr10	32088769	32089833	1065	468	32089237	305	1348.53	21.11	N/A	N/A	N/A	N/A	N/A	N/A
chr10	32256994	32257856	863	398	32257392	81	153.14	12.27	N/A	N/A	N/A	N/A	N/A	N/A
chr10	32384975	32385714	740	445	32385420	69	96.79	8.12	N/A	N/A	N/A	N/A	N/A	N/A
chr10	32480699	32481126	428	235	32480934	31	111.49	10.42	chr10	32480908	32480993	MLT1K	LTR	MaLR
chr10	33573106	33573790	685	353	33573459	27	129.06	15.33	N/A	N/A	N/A	N/A	N/A	N/A
chr10	34354021	34354577	557	228	34354249	33	220.72	30.14	chr10	34354202	34354526	MLT1K	LTR	MaLR
chr10	34466107	34466987	881	450	34466557	88	379.21	27.19	chr10	34466510	34466613	MLT1H2	LTR	MaLR
chr10	35537330	35538157	828	385	35537715	79	207.39	15.56	chr10	35537511	35537777	MLT1J	LTR	MaLR
chr10	35970979	35971667	689	333	35971312	34	131.52	16.29	N/A	N/A	N/A	N/A	N/A	N/A
chr10	38731397	38732241	845	430	38731827	43	263.34	36.79	N/A	N/A	N/A	N/A	N/A	N/A
chr10	38856992	38858651	1660	1332	38858324	72	147.29	5.56	chr10	38857683	38858638	(GAATG)n	Satellite	Satellite
chr10	41677839	41678657	819	436	41678275	55	153.4	7.55	chr10	41678152	41678511	(CATTC)n	Satellite	Satellite
chr10	41680988	41682167	1180	453	41681441	51	146.46	10.23	chr10	41680903	41682187	(CATTC)n	Satellite	Satellite
chr10	42183225	42184002	778	301	42183526	104	737.53	46.03	N/A	N/A	N/A	N/A	N/A	N/A
chr10	43122453	43122837	385	152	43122605	17	105.25	16.82	chr10	43122431	43122681	LTR12B	LTR	ERV1
chr10	43176973	43178298	1326	812	43177785	273	1138.05	28.86	N/A	N/A	N/A	N/A	N/A	N/A
chr10	43212480	43213105	626	317	43212797	96	215.19	8.41	N/A	N/A	N/A	N/A	N/A	N/A
chr10	43224097	43225071	975	306	43224403	93	330.82	15.33	N/A	N/A	N/A	N/A	N/A	N/A
chr10	43233390	43233999	610	331	43233721	36	166.3	13.83	chr10	43233500	43233838	MER74C	LTR	ERVL
chr10	45487646	45488934	1289	670	45488316	414	1953.43	34.66	N/A	N/A	N/A	N/A	N/A	N/A
chr10	46398551	46398991	441	276	46398827	23	95.91	10.15	chr10	46398616	46398862	MLT1K	LTR	MaLR
chr10	46400450	46401301	852	418	46400868	78	441.37	31.16	chr10	46400593	46401011	MLT1J	LTR	MaLR
chr10	48040028	48040778	751	433	48040461	89	588.1	42.27	chr10	48040101	48040506	MLT1K	LTR	MaLR
chr10	48167931	48168498	568	210	48168141	37	243.17	22.55	chr10	48168074	48168420	MLT1I	LTR	MaLR
chr10	48192036	48192780	745	335	48192371	38	211.36	25.98	chr10	48192119	48192610	LTR12_	LTR	ERV1
chr10	48263146	48263679	534	156	48263302	21	116.31	12.61	chr10	48263125	48263602	LTR12	LTR	ERV1
chr10	48276494	48277125	632	333	48276827	40	281.41	34.69	chr10	48276378	48277070	LTR12_	LTR	ERV1
chr10	49161893	49162653	761	404	49162297	46	120.41	12.25	chr10	49162176	49162330	MLT1J2	LTR	MaLR
chr10	49545753	49546974	1222	819	49546572	83	96.64	8.54	N/A	N/A	N/A	N/A	N/A	N/A
chr10	49996474	49997021	548	209	49996683	37	167.74	14.43	N/A	N/A	N/A	N/A	N/A	N/A
chr10	50050637	50051371	735	395	50051032	54	139.96	9.3	chr10	50050948	50051352	MLT1K	LTR	MaLR
chr10	50078914	50079428	515	197	50079111	18	93.67	15.77	chr10	50079010	50079158	MLT1J	LTR	MaLR
chr10	51847935	51848704	770	373	51848308	137	713.69	25.51	N/A	N/A	N/A	N/A	N/A	N/A
chr10	52393523	52394149	627	150	52393673	38	223.85	15.58	chr10	52393627	52394453	LTR12D	LTR	ERV1
chr10	54395348	54396331	984	439	54395787	93	252.99	13.96	chr10	54394184	54395837	MER52A	LTR	ERV1
chr10	55767300	55767747	448	265	55767565	17	94.87	12.61	chr10	55767331	55767771	MER101B	LTR	ERV1
chr10	57790420	57791648	1229	681	57791101	420	1822.96	28.21	N/A	N/A	N/A	N/A	N/A	N/A
chr10	59013311	59013893	583	257	59013568	23	126.08	14.72	chr10	59013519	59014208	LTR12B	LTR	ERV1
chr10	59697383	59698126	744	435	59697818	62	130.6	7.73	N/A	N/A	N/A	N/A	N/A	N/A
chr10	60477750	60478546	797	493	60478243	116	832.11	45.35	chr10	60477581	60478404	L1PA16	LINE	L1
chr10	62147592	62148151	560	165	62147757	23	129.73	17.87	chr10	62147587	62147983	MER57A	LTR	ERV1
chr10	62207757	62208518	762	449	62208206	169	493.67	13.42	N/A	N/A	N/A	N/A	N/A	N/A
chr10	62250002	62250830	829	406	62250408	57	321.53	30.42	N/A	N/A	N/A	N/A	N/A	N/A
chr10	62340155	62340728	574	285	62340440	21	109.12	13.46	N/A	N/A	N/A	N/A	N/A	N/A
chr10	62538505	62539322	818	401	62538906	29	118.46	16.23	N/A	N/A	N/A	N/A	N/A	N/A
chr10	62542699	62543242	544	342	62543041	23	132.37	22.07	chr10	62542714	62543185	MLT1K	LTR	MaLR
chr10	63318303	63318945	643	369	63318672	26	105.71	10.82	chr10	63318670	63318792	L3b	LINE	CR1
chr10	63428645	63428997	353	190	63428835	43	137.85	8.02	chr10	63428573	63428957	MLT1I	LTR	MaLR
chr10	63729125	63729713	589	289	63729414	30	189.54	25.23	chr10	63728884	63729451	L2	LINE	L2
chr10	63745120	63745685	566	375	63745495	29	184.53	27.33	N/A	N/A	N/A	N/A	N/A	N/A
chr10	63907161	63908031	871	446	63907607	62	281.54	25.77	chr10	63907351	63907727	MLT1I	LTR	MaLR
chr10	64533566	64534329	764	419	64533985	34	194.13	26.28	chr10	64533803	64534375	LTR8	LTR	ERV1
chr10	65190876	65191408	533	284	65191160	31	165.43	16.6	chr10	65190942	65191385	MLT1K	LTR	MaLR
chr10	70252367	70252887	521	151	70252518	20	109.65	16.82	chr10	70252246	70252867	LTR12D	LTR	ERV1
chr10	70330442	70331421	980	472	70330914	148	344.76	13.63	N/A	N/A	N/A	N/A	N/A	N/A
chr10	70417919	70418895	977	518	70418437	260	877.93	20.16	N/A	N/A	N/A	N/A	N/A	N/A
chr10	70517303	70518218	916	408	70517711	99	184.35	10.04	N/A	N/A	N/A	N/A	N/A	N/A
chr10	70522620	70523499	880	580	70523200	158	708.72	23.07	chr10	70522900	70523207	MER33	DNA	MER1_type
chr10	70554248	70555249	1002	536	70554784	62	128.75	10.31	N/A	N/A	N/A	N/A	N/A	N/A
chr10	70854929	70855898	970	477	70855406	156	1016.62	49.71	chr10	70855241	70855490	MLT1L	LTR	MaLR
chr10	70880607	70881512	906	586	70881193	200	1188.64	36.59	N/A	N/A	N/A	N/A	N/A	N/A
chr10	71030473	71031105	633	279	71030752	22	97.64	13.53	chr10	71030524	71030921	MLT1K	LTR	MaLR
chr10	71424031	71424389	359	186	71424217	36	324.15	34.69	chr10	71424209	71424301	MLT1J	LTR	MaLR
chr10	71576194	71577058	865	293	71576487	192	430.84	9.81	N/A	N/A	N/A	N/A	N/A	N/A
chr10	71811936	71812989	1054	518	71812454	224	1045.96	26.2	N/A	N/A	N/A	N/A	N/A	N/A
chr10	72009126	72009950	825	343	72009469	158	739.79	25.04	chr10	72009415	72009835	MLT1K	LTR	MaLR
chr10	72806717	72807790	1074	581	72807298	161	249.07	12.06	N/A	N/A	N/A	N/A	N/A	N/A
chr10	72938976	72939589	614	379	72939355	57	481.81	49.4	chr10	72939041	72939531	MLT1K	LTR	MaLR
chr10	73226598	73227384	787	389	73226987	56	262.01	21.22	N/A	N/A	N/A	N/A	N/A	N/A
chr10	73565705	73566518	814	299	73566004	63	330.73	17.18	chr10	73565940	73566823	LTR12	LTR	ERV1
chr10	73702977	73704171	1195	592	73703569	243	361	10	N/A	N/A	N/A	N/A	N/A	N/A
chr10	73725260	73726242	983	548	73725808	96	176.35	10.65	chr10	73725609	73726088	MLT1K	LTR	MaLR
chr10	73726825	73728438	1614	1073	73727898	340	732.66	16.64	N/A	N/A	N/A	N/A	N/A	N/A
chr10	73761356	73762424	1069	588	73761944	158	394.26	14.86	N/A	N/A	N/A	N/A	N/A	N/A
chr10	74316661	74317221	561	235	74316896	22	112.07	18.04	N/A	N/A	N/A	N/A	N/A	N/A
chr10	74538639	74539106	468	313	74538952	37	227.4	20.71	N/A	N/A	N/A	N/A	N/A	N/A
chr10	75214566	75215486	921	501	75215067	206	559.96	16.18	N/A	N/A	N/A	N/A	N/A	N/A
chr10	75375165	75375667	503	275	75375440	22	121.45	18.99	chr10	75374216	75375727	LTR12C	LTR	ERV1
chr10	75427276	75428235	960	532	75427808	187	688.17	18.98	N/A	N/A	N/A	N/A	N/A	N/A
chr10	75605867	75606794	928	588	75606455	160	239.75	8.98	N/A	N/A	N/A	N/A	N/A	N/A
chr10	76255367	76256837	1471	928	76256295	622	2978.18	24.85	N/A	N/A	N/A	N/A	N/A	N/A
chr10	76699158	76699981	824	388	76699546	46	166.25	17.34	chr10	76699530	76699709	MLT1J	LTR	MaLR
chr10	76810671	76811308	638	220	76810891	31	153.48	20.98	chr10	76810792	76810973	MLT1J	LTR	MaLR
chr10	76831204	76832545	1342	383	76831587	177	1285.94	40.89	N/A	N/A	N/A	N/A	N/A	N/A
chr10	76970044	76970605	562	236	76970280	19	95.54	10.51	N/A	N/A	N/A	N/A	N/A	N/A
chr10	76994455	76995131	677	319	76994774	25	129.14	14.72	N/A	N/A	N/A	N/A	N/A	N/A
chr10	78294452	78295153	702	444	78294896	56	438.63	44.15	chr10	78294854	78295220	MLT1L	LTR	MaLR
chr10	78311941	78312596	656	213	78312154	41	108.39	9.51	N/A	N/A	N/A	N/A	N/A	N/A
chr10	78777709	78778351	643	341	78778050	22	105.11	16.03	N/A	N/A	N/A	N/A	N/A	N/A
chr10	78923259	78924043	785	423	78923682	48	156.42	14.76	chr10	78923657	78923707	MIR	SINE	MIR
chr10	79097042	79097867	826	354	79097396	107	703.44	38.74	N/A	N/A	N/A	N/A	N/A	N/A
chr10	79458866	79459750	885	479	79459345	100	175.03	10.39	N/A	N/A	N/A	N/A	N/A	N/A
chr10	79463098	79464146	1049	487	79463585	200	540.59	16.23	N/A	N/A	N/A	N/A	N/A	N/A
chr10	79564555	79565341	787	330	79564885	62	341.67	29.46	chr10	79564511	79565053	MLT1K	LTR	MaLR
chr10	79649254	79649971	718	383	79649637	36	174.46	16.54	chr10	79649338	79649856	LTR12	LTR	ERV1
chr10	79729807	79730666	860	500	79730307	78	319.71	12.03	chr10	79729835	79730354	LTR12	LTR	ERV1
chr10	79836544	79837406	863	401	79836945	47	150.2	10.82	N/A	N/A	N/A	N/A	N/A	N/A
chr10	80141858	80142515	658	328	80142186	32	125.29	14.84	chr10	80142106	80142547	MLT1K	LTR	MaLR
chr10	80451921	80453171	1251	591	80452512	191	987.5	37.88	N/A	N/A	N/A	N/A	N/A	N/A
chr10	81659838	81660371	534	386	81660224	28	181.41	26.28	chr10	81660042	81660386	MER57B	LTR	ERV1
chr10	82433627	82434558	932	556	82434183	233	2163.68	79.89	chr10	82434023	82434454	MLT1J	LTR	MaLR
chr10	82685561	82686061	501	241	82685802	19	104.08	12.61	chr10	82685672	82686071	MER101	LTR	ERV1
chr10	84623079	84623617	539	164	84623243	31	200.66	26.25	N/A	N/A	N/A	N/A	N/A	N/A
chr10	84658257	84659052	796	438	84658695	41	253.96	31.53	N/A	N/A	N/A	N/A	N/A	N/A
chr10	84674706	84675374	669	234	84674940	47	299.89	27.06	chr10	84674706	84674946	MIRb	SINE	MIR
chr10	85888716	85889682	967	459	85889175	160	398.79	16.88	N/A	N/A	N/A	N/A	N/A	N/A
chr10	86083513	86084715	1203	647	86084160	145	774.38	27.22	N/A	N/A	N/A	N/A	N/A	N/A
chr10	86693942	86694479	538	199	86694141	30	162.96	16.12	chr10	86694048	86694242	LTR50	LTR	ERVL
chr10	88007954	88008783	830	433	88008387	91	733.35	64.6	chr10	88008127	88008461	MLT1I	LTR	MaLR
chr10	88087597	88088388	792	336	88087933	173	1922.13	93.8	chr10	88087899	88088085	MLT1K	LTR	MaLR
chr10	88271235	88272090	856	361	88271596	200	529.83	12.93	N/A	N/A	N/A	N/A	N/A	N/A
chr10	88288259	88288714	456	193	88288452	22	117.26	15.58	chr10	88287945	88288493	LTR12	LTR	ERV1
chr10	88638596	88639509	914	473	88639069	89	152.13	10.82	N/A	N/A	N/A	N/A	N/A	N/A
chr10	88842872	88843635	764	469	88843341	58	203.4	15.15	N/A	N/A	N/A	N/A	N/A	N/A
chr10	89807311	89808063	753	298	89807609	90	595.25	33.38	chr10	89807551	89807969	MLT1J	LTR	MaLR
chr10	90136579	90137533	955	554	90137133	87	104.74	7.5	N/A	N/A	N/A	N/A	N/A	N/A
chr10	90347691	90348438	748	340	90348031	67	140.64	9.62	N/A	N/A	N/A	N/A	N/A	N/A
chr10	90732100	90732604	505	196	90732296	67	509.52	32.19	N/A	N/A	N/A	N/A	N/A	N/A
chr10	91001064	91002155	1092	572	91001636	283	957.1	18.26	N/A	N/A	N/A	N/A	N/A	N/A
chr10	91101611	91102426	816	386	91101997	106	608.83	32.07	chr10	91101653	91102328	MER72B	LTR	ERV1
chr10	91113605	91114380	776	381	91113986	60	162.4	13.16	N/A	N/A	N/A	N/A	N/A	N/A
chr10	91155804	91156357	554	265	91156069	26	158.17	24.18	chr10	91155953	91156573	LTR12_	LTR	ERV1
chr10	91393264	91394454	1191	584	91393848	197	533.41	13.88	N/A	N/A	N/A	N/A	N/A	N/A
chr10	91429433	91430201	769	453	91429886	127	839.48	42.01	N/A	N/A	N/A	N/A	N/A	N/A
chr10	91450611	91451791	1181	599	91451210	311	891.78	19.24	N/A	N/A	N/A	N/A	N/A	N/A
chr10	91796805	91797250	446	235	91797040	19	101.33	12.63	chr10	91794814	91799148	L1PA16	LINE	L1
chr10	92473038	92473756	719	272	92473310	28	127.5	16.43	chr10	92473176	92473362	LTR33	LTR	ERVL
chr10	93010775	93011296	522	258	93011033	32	125.29	12.24	N/A	N/A	N/A	N/A	N/A	N/A
chr10	93982524	93983100	577	326	93982850	21	109.93	16.82	N/A	N/A	N/A	N/A	N/A	N/A
chr10	94018535	94019168	634	295	94018830	28	121.74	14.43	chr10	94018585	94018989	LTR16A	LTR	ERVL
chr10	94342487	94343305	819	307	94342794	179	431.14	13.15	N/A	N/A	N/A	N/A	N/A	N/A
chr10	94406101	94406821	721	461	94406562	30	122.73	18.04	chr10	94406085	94406704	L1M4	LINE	L1
chr10	94508886	94509639	754	303	94509189	51	200.28	17.14	chr10	94508914	94509300	MLT1L	LTR	MaLR
chr10	95201782	95202242	461	230	95202012	17	92.94	12.61	N/A	N/A	N/A	N/A	N/A	N/A
chr10	95245811	95246688	878	492	95246303	105	255.16	11.85	N/A	N/A	N/A	N/A	N/A	N/A
chr10	95665200	95665806	607	329	95665529	62	431.26	35.41	chr10	95665313	95665680	MLT1L	LTR	MaLR
chr10	97310753	97311478	726	463	97311216	82	243.59	14.01	N/A	N/A	N/A	N/A	N/A	N/A
chr10	97443322	97444161	840	436	97443758	234	499.37	10.54	N/A	N/A	N/A	N/A	N/A	N/A
chr10	97504977	97505842	866	399	97505376	174	634.6	19.54	N/A	N/A	N/A	N/A	N/A	N/A
chr10	97508060	97508951	892	554	97508614	112	126.94	7.94	N/A	N/A	N/A	N/A	N/A	N/A
chr10	97792581	97793687	1107	661	97793242	282	1135.84	24.72	N/A	N/A	N/A	N/A	N/A	N/A
chr10	98263265	98264215	951	493	98263758	101	224.26	11	N/A	N/A	N/A	N/A	N/A	N/A
chr10	98551187	98551672	486	319	98551506	38	138.91	9.82	chr10	98551351	98551529	GA-rich	Low_complexity	Low_complexity
chr10	98583817	98584361	545	278	98584095	46	121.64	6.39	N/A	N/A	N/A	N/A	N/A	N/A
chr10	98877277	98877668	392	192	98877469	17	93.55	13.53	N/A	N/A	N/A	N/A	N/A	N/A
chr10	99041649	99043063	1415	804	99042453	570	2408.05	25.16	N/A	N/A	N/A	N/A	N/A	N/A
chr10	99195298	99196230	933	504	99195802	151	319.75	13.27	N/A	N/A	N/A	N/A	N/A	N/A
chr10	99247069	99248900	1832	502	99247571	214	321.52	10.84	N/A	N/A	N/A	N/A	N/A	N/A
chr10	99382812	99383733	922	475	99383287	152	434.46	14.61	N/A	N/A	N/A	N/A	N/A	N/A
chr10	99389890	99390751	862	489	99390379	332	1447.84	17.59	N/A	N/A	N/A	N/A	N/A	N/A
chr10	99546253	99546953	701	396	99546649	39	220.4	27.82	chr10	99546519	99546805	MLT1L	LTR	MaLR
chr10	100140970	100141745	776	449	100141419	165	1125.56	41.98	chr10	100141301	100141725	MLT1H	LTR	MaLR
chr10	101179518	101181284	1767	1001	101180519	669	2613.61	26.4	N/A	N/A	N/A	N/A	N/A	N/A
chr10	101369724	101371102	1379	586	101370310	458	1794.72	20.94	N/A	N/A	N/A	N/A	N/A	N/A
chr10	101374894	101375607	714	302	101375196	59	295.61	16.03	chr10	101374693	101375256	LTR12_	LTR	ERV1
chr10	101408694	101409634	941	416	101409110	223	550.81	12.09	N/A	N/A	N/A	N/A	N/A	N/A
chr10	101770049	101771515	1467	1178	101771227	159	267.44	10.59	chr10	101771094	101771464	MER57A	LTR	ERV1
chr10	102016998	102017779	782	443	102017441	114	213.57	11.17	N/A	N/A	N/A	N/A	N/A	N/A
chr10	102096282	102097291	1010	457	102096739	154	541.08	19.56	N/A	N/A	N/A	N/A	N/A	N/A
chr10	102122737	102123821	1085	517	102123254	228	797.55	16.37	N/A	N/A	N/A	N/A	N/A	N/A
chr10	102230976	102232038	1063	472	102231448	398	2055.76	32.72	N/A	N/A	N/A	N/A	N/A	N/A
chr10	102662147	102663380	1234	473	102662620	229	382.28	13.29	N/A	N/A	N/A	N/A	N/A	N/A
chr10	102780005	102781745	1741	933	102780938	430	2612.47	61.33	N/A	N/A	N/A	N/A	N/A	N/A
chr10	103338467	103339233	767	452	103338919	52	124.64	11.53	N/A	N/A	N/A	N/A	N/A	N/A
chr10	103868818	103869956	1139	664	103869482	334	2072.8	41.88	N/A	N/A	N/A	N/A	N/A	N/A
chr10	103975521	103976505	985	520	103976041	90	334.62	16.73	N/A	N/A	N/A	N/A	N/A	N/A
chr10	103994433	103996734	2302	769	103995202	401	904.81	19.67	N/A	N/A	N/A	N/A	N/A	N/A
chr10	104143723	104144667	945	448	104144171	188	426.44	13.53	N/A	N/A	N/A	N/A	N/A	N/A
chr10	104210510	104211604	1095	570	104211080	171	413.53	16.44	N/A	N/A	N/A	N/A	N/A	N/A
chr10	104251320	104253079	1760	629	104251949	423	1312.27	22.41	N/A	N/A	N/A	N/A	N/A	N/A
chr10	104463290	104464862	1573	968	104464258	166	106.97	8.22	N/A	N/A	N/A	N/A	N/A	N/A
chr10	104492732	104494198	1467	778	104493510	406	1500.46	28.64	N/A	N/A	N/A	N/A	N/A	N/A
chr10	104667156	104668735	1580	835	104667991	602	2651.11	24.85	N/A	N/A	N/A	N/A	N/A	N/A
chr10	104803679	104804249	571	166	104803845	30	128.34	14.43	N/A	N/A	N/A	N/A	N/A	N/A
chr10	105145706	105146813	1108	585	105146291	268	675.63	16.78	N/A	N/A	N/A	N/A	N/A	N/A
chr10	105486326	105487147	822	351	105486677	61	230.78	21.65	chr10	105486563	105487055	MLT1K	LTR	MaLR
chr10	105549681	105550437	757	354	105550035	82	498.02	28.35	chr10	105550031	105550420	MLT1K	LTR	MaLR
chr10	105871179	105872148	970	609	105871788	178	391.5	11.45	N/A	N/A	N/A	N/A	N/A	N/A
chr10	105981500	105982596	1097	619	105982119	163	587.65	19.24	N/A	N/A	N/A	N/A	N/A	N/A
chr10	105995527	105995779	253	127	105995654	26	194.02	11.87	chr10	105994734	105996106	LTR12C	LTR	ERV1
chr10	106018143	106019462	1320	695	106018838	378	1153.04	18.58	N/A	N/A	N/A	N/A	N/A	N/A
chr10	106136775	106137471	697	455	106137230	28	104.99	10.82	chr10	106137112	106137244	MLT1H2	LTR	MaLR
chr10	107701749	107702526	778	365	107702114	61	105.86	9.22	chr10	107701946	107702284	MER57A	LTR	ERV1
chr10	108669115	108670063	949	609	108669724	86	285.33	16.23	N/A	N/A	N/A	N/A	N/A	N/A
chr10	109686023	109686563	541	200	109686223	20	102.96	14.03	chr10	109686164	109686479	MER51A	LTR	ERV1
chr10	111648677	111649455	779	388	111649065	38	155.08	15.19	chr10	111648896	111649307	MLT1J2	LTR	MaLR
chr10	111661948	111662609	662	344	111662292	29	90.02	7.22	N/A	N/A	N/A	N/A	N/A	N/A
chr10	111759571	111760543	973	454	111760025	164	548.75	21.32	N/A	N/A	N/A	N/A	N/A	N/A
chr10	111823973	111824649	677	242	111824215	58	148.32	10.34	N/A	N/A	N/A	N/A	N/A	N/A
chr10	111960466	111961685	1220	593	111961059	367	1508.99	30.96	N/A	N/A	N/A	N/A	N/A	N/A
chr10	112054387	112055204	818	358	112054745	105	173.57	9.71	N/A	N/A	N/A	N/A	N/A	N/A
chr10	112614128	112614903	776	409	112614537	119	135.54	7.55	N/A	N/A	N/A	N/A	N/A	N/A
chr10	112620950	112622016	1067	645	112621595	118	251.38	15.12	N/A	N/A	N/A	N/A	N/A	N/A
chr10	112668795	112669614	820	298	112669093	98	95.01	7.32	N/A	N/A	N/A	N/A	N/A	N/A
chr10	114099850	114100336	487	252	114100102	22	117.53	15.81	chr10	114099321	114100620	LTR12E	LTR	ERV1
chr10	114592559	114593296	738	367	114592926	32	125.29	12.65	chr10	114592853	114592992	MLT2E	LTR	ERVL
chr10	114731104	114731812	709	334	114731438	71	206.27	11.86	N/A	N/A	N/A	N/A	N/A	N/A
chr10	115110685	115111141	457	247	115110932	21	98.36	12.27	N/A	N/A	N/A	N/A	N/A	N/A
chr10	115923456	115924593	1138	575	115924031	340	1610.52	30.39	N/A	N/A	N/A	N/A	N/A	N/A
chr10	116004884	116005645	762	319	116005203	62	425.61	35.26	chr10	116004824	116005241	MLT1K	LTR	MaLR
chr10	116102451	116103255	805	401	116102852	36	129.94	16.84	chr10	116102654	116103166	MLT1K	LTR	MaLR
chr10	116642840	116643561	722	327	116643167	22	99.42	15.77	N/A	N/A	N/A	N/A	N/A	N/A
chr10	116786307	116786832	526	373	116786680	25	154.04	23.12	chr10	116786649	116787270	LTR12_	LTR	ERV1
chr10	118134692	118135435	744	294	118134986	42	245.38	27.28	chr10	118134850	118135320	L2	LINE	L2
chr10	118533549	118533939	391	217	118533766	21	121.58	13.94	chr10	118533641	118533787	MLT1J2	LTR	MaLR
chr10	118976193	118976692	500	294	118976487	20	100.9	13.53	N/A	N/A	N/A	N/A	N/A	N/A
chr10	119124628	119125385	758	349	119124977	63	119.26	10.62	N/A	N/A	N/A	N/A	N/A	N/A
chr10	119448056	119448854	799	437	119448493	36	125.57	17.3	chr10	119448141	119448613	MLT1J	LTR	MaLR
chr10	119645961	119646618	658	232	119646193	35	172.52	18.04	chr10	119646154	119646256	MLT1K	LTR	MaLR
chr10	120091404	120092217	814	425	120091829	137	387.5	14.96	N/A	N/A	N/A	N/A	N/A	N/A
chr10	120743132	120744014	883	420	120743552	42	185.97	13.71	N/A	N/A	N/A	N/A	N/A	N/A
chr10	120778337	120779143	807	589	120778926	269	2310.87	64.61	N/A	N/A	N/A	N/A	N/A	N/A
chr10	121551306	121551971	666	239	121551545	114	686.65	28.53	chr10	121551520	121551905	MLT1L	LTR	MaLR
chr10	121827145	121827970	826	368	121827513	48	154.25	14.9	chr10	121827040	121828098	MER45B	DNA	Tip100
chr10	121906069	121906849	781	356	121906425	49	308.33	29.76	N/A	N/A	N/A	N/A	N/A	N/A
chr10	121935242	121935686	445	291	121935533	26	112.34	12.84	chr10	121935163	121935539	MLT1K	LTR	MaLR
chr10	122186033	122186791	759	374	122186407	33	106.43	11.5	chr10	122186030	122186476	MLT1K	LTR	MaLR
chr10	122357556	122358301	746	415	122357971	40	106.82	9.23	chr10	122357796	122358301	MLT1K	LTR	MaLR
chr10	122781945	122782541	597	362	122782307	49	227.87	18.94	chr10	122782159	122782454	MLT1K	LTR	MaLR
chr10	123347896	123348514	619	165	123348061	40	284.8	34.69	chr10	123348058	123348082	GC_rich	Low_complexity	Low_complexity
chr10	124849544	124850037	494	148	124849692	22	99.69	9.38	chr10	124849687	124849766	MLT1K	LTR	MaLR
chr10	124903452	124904363	912	366	124903818	230	688.56	14.36	N/A	N/A	N/A	N/A	N/A	N/A
chr10	125045014	125045829	816	332	125045346	147	1380.15	82.26	chr10	125045287	125045473	MLT1J2	LTR	MaLR
chr10	125136109	125136580	472	239	125136348	37	226.15	21.38	N/A	N/A	N/A	N/A	N/A	N/A
chr10	125297989	125298934	946	474	125298463	108	615.16	34.72	N/A	N/A	N/A	N/A	N/A	N/A
chr10	125651090	125651589	500	207	125651297	25	122.11	10.82	chr10	125651099	125651511	MER101	LTR	ERV1
chr10	126097238	126098025	788	303	126097541	200	1068.72	24.64	N/A	N/A	N/A	N/A	N/A	N/A
chr10	126594885	126595723	839	493	126595378	122	301.95	11.69	N/A	N/A	N/A	N/A	N/A	N/A
chr10	127041484	127042101	618	166	127041650	77	737.32	64.12	N/A	N/A	N/A	N/A	N/A	N/A
chr10	129814250	129815262	1013	505	129814755	245	1422.64	36.08	N/A	N/A	N/A	N/A	N/A	N/A
chr10	129838298	129838932	635	352	129838650	68	169.63	11.07	N/A	N/A	N/A	N/A	N/A	N/A
chr10	130469874	130470348	475	264	130470138	27	184.45	18.92	chr10	130470060	130470376	MLT1I	LTR	MaLR
chr10	131798396	131800408	2013	1005	131799401	766	2692.66	21.18	N/A	N/A	N/A	N/A	N/A	N/A
chr10	133192474	133192889	416	148	133192622	20	127.7	17.87	chr10	133192572	133192729	MLT1I	LTR	MaLR
chr10	133998020	133999401	1382	726	133998746	141	578.56	15.03	chr10	133998592	133998832	LTR71B	LTR	ERV1
chr10	135051373	135052113	741	372	135051745	46	118.88	9.84	chr10	135051640	135051967	L1PA13	LINE	L1
chr10	135052298	135052943	646	291	135052589	90	200.67	9.46	N/A	N/A	N/A	N/A	N/A	N/A
chr11	303509	304201	693	405	303914	62	121.09	8.35	N/A	N/A	N/A	N/A	N/A	N/A
chr11	319096	320120	1025	552	319648	334	2645.93	57.27	chr11	319236	319833	LTR71B	LTR	ERV1
chr11	490440	491092	653	303	490743	47	214.73	18.04	N/A	N/A	N/A	N/A	N/A	N/A
chr11	525332	526232	901	313	525645	316	1564.76	30.63	N/A	N/A	N/A	N/A	N/A	N/A
chr11	550146	551571	1426	813	550959	498	3148	52.85	chr11	550945	550986	GC_rich	Low_complexity	Low_complexity
chr11	558144	559011	868	415	558559	283	1479.17	30.02	N/A	N/A	N/A	N/A	N/A	N/A
chr11	605487	606346	860	537	606024	102	199.25	8.72	N/A	N/A	N/A	N/A	N/A	N/A
chr11	736875	737787	913	509	737384	159	603.59	22.19	N/A	N/A	N/A	N/A	N/A	N/A
chr11	799300	800249	950	547	799847	259	994.1	20.92	N/A	N/A	N/A	N/A	N/A	N/A
chr11	809103	810451	1349	395	809498	180	348.88	13.36	N/A	N/A	N/A	N/A	N/A	N/A
chr11	819965	820846	882	418	820383	81	187.02	11.46	N/A	N/A	N/A	N/A	N/A	N/A
chr11	849541	850090	550	288	849829	36	154.41	14.39	N/A	N/A	N/A	N/A	N/A	N/A
chr11	1419815	1420363	549	344	1420159	50	344.2	28.14	N/A	N/A	N/A	N/A	N/A	N/A
chr11	1542061	1542893	833	481	1542542	70	187.01	12.88	N/A	N/A	N/A	N/A	N/A	N/A
chr11	1549987	1550686	700	170	1550157	125	895.89	42.93	N/A	N/A	N/A	N/A	N/A	N/A
chr11	2677447	2678596	1150	484	2677931	412	2356.41	33.67	N/A	N/A	N/A	N/A	N/A	N/A
chr11	2863311	2864218	908	435	2863746	68	210.31	16.07	chr11	2863701	2863749	(CCCCG)n	Simple_repeat	Simple_repeat
chr11	2969642	2970783	1142	601	2970243	203	303.62	10.82	N/A	N/A	N/A	N/A	N/A	N/A
chr11	3356431	3357641	1211	616	3357047	317	1483.37	33.57	N/A	N/A	N/A	N/A	N/A	N/A
chr11	3633148	3633798	651	343	3633491	31	141.76	14.43	N/A	N/A	N/A	N/A	N/A	N/A
chr11	3774854	3776274	1421	581	3775435	469	1331.12	13.03	N/A	N/A	N/A	N/A	N/A	N/A
chr11	3856948	3857727	780	423	3857371	48	97.54	8.88	chr11	3857347	3857545	MIRb	SINE	MIR
chr11	4035713	4036608	896	445	4036158	49	93.87	8.42	N/A	N/A	N/A	N/A	N/A	N/A
chr11	4072074	4072870	797	415	4072489	90	100.96	7.33	N/A	N/A	N/A	N/A	N/A	N/A
chr11	4585536	4586896	1361	548	4586084	327	954.47	18.66	N/A	N/A	N/A	N/A	N/A	N/A
chr11	4740678	4741617	940	461	4741139	128	1056.55	69.99	N/A	N/A	N/A	N/A	N/A	N/A
chr11	5528129	5529042	914	547	5528676	56	295.54	24.53	N/A	N/A	N/A	N/A	N/A	N/A
chr11	5602312	5603195	884	476	5602788	149	279.53	12.65	N/A	N/A	N/A	N/A	N/A	N/A
chr11	6212234	6213364	1131	288	6212522	184	223.61	6.96	N/A	N/A	N/A	N/A	N/A	N/A
chr11	6583894	6584444	551	191	6584085	112	533.71	19.48	N/A	N/A	N/A	N/A	N/A	N/A
chr11	7964845	7965565	721	479	7965324	97	140.74	8.56	N/A	N/A	N/A	N/A	N/A	N/A
chr11	8728721	8729477	757	351	8729072	37	169.59	15.15	chr11	8729058	8729841	LTR12C	LTR	ERV1
chr11	8888921	8889664	744	357	8889278	42	100.2	12.08	N/A	N/A	N/A	N/A	N/A	N/A
chr11	8942401	8943480	1080	566	8942967	122	115.5	8.06	N/A	N/A	N/A	N/A	N/A	N/A
chr11	9438143	9439727	1585	870	9439013	727	3100	29.69	N/A	N/A	N/A	N/A	N/A	N/A
chr11	9550735	9552113	1379	917	9551652	159	105.44	7.59	N/A	N/A	N/A	N/A	N/A	N/A
chr11	10406349	10407126	778	371	10406720	29	107.65	12.27	N/A	N/A	N/A	N/A	N/A	N/A
chr11	10642616	10643223	608	187	10642803	62	471.25	43.14	chr11	10642772	10643169	MLT1K	LTR	MaLR
chr11	10786649	10787652	1004	533	10787182	217	443.01	11.6	N/A	N/A	N/A	N/A	N/A	N/A
chr11	10835663	10836806	1144	657	10836320	228	514.78	12.53	N/A	N/A	N/A	N/A	N/A	N/A
chr11	10962128	10963023	896	445	10962573	73	328.66	23.9	chr11	10962533	10962735	MLT1J	LTR	MaLR
chr11	11429462	11430039	578	277	11429739	34	96.11	10.82	N/A	N/A	N/A	N/A	N/A	N/A
chr11	11599824	11600737	914	431	11600255	172	782.65	24.73	N/A	N/A	N/A	N/A	N/A	N/A
chr11	11821306	11821893	588	354	11821660	56	96.48	5.71	N/A	N/A	N/A	N/A	N/A	N/A
chr11	11909290	11910108	819	429	11909719	37	158.78	20.92	N/A	N/A	N/A	N/A	N/A	N/A
chr11	12255163	12255779	617	237	12255400	55	354.85	32.74	chr11	12255107	12255598	MLT1H	LTR	MaLR
chr11	12973260	12973825	566	348	12973608	28	174.85	23.12	chr11	12973275	12973691	MLT1K	LTR	MaLR
chr11	13092873	13093363	491	233	13093106	22	132.46	17.87	N/A	N/A	N/A	N/A	N/A	N/A
chr11	13254811	13256424	1614	835	13255646	604	3100	44.5	N/A	N/A	N/A	N/A	N/A	N/A
chr11	13645829	13647345	1517	863	13646692	505	2514.24	26.32	N/A	N/A	N/A	N/A	N/A	N/A
chr11	14320847	14321656	810	407	14321254	44	109.01	10.82	N/A	N/A	N/A	N/A	N/A	N/A
chr11	14869915	14870802	888	510	14870425	156	545.18	19.35	N/A	N/A	N/A	N/A	N/A	N/A
chr11	15121992	15122581	590	164	15122156	45	259.64	23.84	N/A	N/A	N/A	N/A	N/A	N/A
chr11	15432267	15432996	730	407	15432674	30	143.24	18.44	chr11	15432285	15432704	MLT1L	LTR	MaLR
chr11	16390660	16391255	596	356	16391016	50	291.52	22.85	chr11	16390751	16391144	MLT1K	LTR	MaLR
chr11	17254121	17255506	1386	652	17254773	464	2197.61	34.83	N/A	N/A	N/A	N/A	N/A	N/A
chr11	17385478	17386176	699	401	17385879	39	101.33	11.89	chr11	17385743	17386296	MLT1K	LTR	MaLR
chr11	17681732	17682858	1127	559	17682291	275	2797.99	145.62	chr11	17682177	17682383	MLT1J	LTR	MaLR
chr11	18253450	18253983	534	404	18253854	20	99.78	16.14	chr11	18253364	18254780	LTR12C	LTR	ERV1
chr11	18612058	18613160	1103	536	18612594	179	216.82	9.23	N/A	N/A	N/A	N/A	N/A	N/A
chr11	19094710	19095723	1014	518	19095228	181	536.72	18.87	N/A	N/A	N/A	N/A	N/A	N/A
chr11	19218603	19220296	1694	615	19219218	179	284.37	11.12	N/A	N/A	N/A	N/A	N/A	N/A
chr11	19322829	19323466	638	444	19323273	34	104.66	11.17	N/A	N/A	N/A	N/A	N/A	N/A
chr11	19437215	19437959	745	332	19437547	103	861.34	58.45	chr11	19437252	19437670	MLT1K	LTR	MaLR
chr11	19690164	19691467	1304	741	19690905	296	1563.62	40.11	chr11	19690899	19690922	GC_rich	Low_complexity	Low_complexity
chr11	19692771	19693321	551	161	19692932	39	145.74	13.52	N/A	N/A	N/A	N/A	N/A	N/A
chr11	19769187	19769965	779	341	19769528	37	141.03	16.84	N/A	N/A	N/A	N/A	N/A	N/A
chr11	19884017	19884808	792	389	19884406	41	188.89	18.73	chr11	19884194	19884589	MLT1H	LTR	MaLR
chr11	20338654	20339196	543	364	20339018	31	134.2	12.97	chr11	20338718	20339094	MLT1J	LTR	MaLR
chr11	21453224	21454037	814	417	21453641	86	725.04	74.05	chr11	21453583	21453774	MLT1I	LTR	MaLR
chr11	22499231	22499861	631	379	22499610	71	555.48	47.81	chr11	22499592	22499678	MLT1I	LTR	MaLR
chr11	22602965	22604622	1658	1057	22604022	629	2576.04	28.58	N/A	N/A	N/A	N/A	N/A	N/A
chr11	22634189	22634787	599	258	22634447	100	800.3	49.74	N/A	N/A	N/A	N/A	N/A	N/A
chr11	22652740	22653399	660	345	22653085	71	394.99	23.45	N/A	N/A	N/A	N/A	N/A	N/A
chr11	23180480	23181091	612	323	23180803	32	204.3	19.97	chr11	23180132	23181992	MER52A	LTR	ERV1
chr11	28085789	28086610	822	586	28086375	189	549.04	14.3	N/A	N/A	N/A	N/A	N/A	N/A
chr11	28977647	28978227	581	334	28977981	21	93.15	12.88	chr11	28977933	28978008	MLT1K	LTR	MaLR
chr11	30234979	30235619	641	287	30235266	26	127.72	18.94	N/A	N/A	N/A	N/A	N/A	N/A
chr11	30320616	30321435	820	470	30321086	79	92.22	7.75	chr11	30320920	30321404	MLT1K	LTR	MaLR
chr11	30643207	30643775	569	164	30643371	23	128.28	18.92	chr11	30643346	30643409	MLT1J	LTR	MaLR
chr11	31487145	31488410	1266	714	31487859	481	2385.06	29.09	N/A	N/A	N/A	N/A	N/A	N/A
chr11	31788897	31789788	892	613	31789510	120	396.2	14.23	N/A	N/A	N/A	N/A	N/A	N/A
chr11	32002810	32003708	899	483	32003293	84	536.93	36.97	chr11	32003258	32003389	MLT1L	LTR	MaLR
chr11	32065360	32066386	1027	528	32065888	218	1334.02	32.47	chr11	32065691	32065916	MLT1L	LTR	MaLR
chr11	32114515	32115392	878	494	32115009	85	478.19	29.89	chr11	32114681	32115114	MLT1K	LTR	MaLR
chr11	32561368	32562244	877	486	32561854	100	92.52	7.63	N/A	N/A	N/A	N/A	N/A	N/A
chr11	32993695	32994325	631	228	32993923	55	174.96	12.24	N/A	N/A	N/A	N/A	N/A	N/A
chr11	33380247	33380699	453	185	33380432	47	221.26	14.43	chr11	33380162	33380650	L2	LINE	L2
chr11	33855075	33855591	517	287	33855362	50	344.56	28.59	N/A	N/A	N/A	N/A	N/A	N/A
chr11	34112834	34113451	618	322	34113156	36	144.11	10.31	N/A	N/A	N/A	N/A	N/A	N/A
chr11	34169597	34170119	523	235	34169832	37	182.46	15.85	N/A	N/A	N/A	N/A	N/A	N/A
chr11	34335600	34336955	1356	618	34336218	314	1622.44	39.28	N/A	N/A	N/A	N/A	N/A	N/A
chr11	34416433	34417546	1114	566	34416999	339	1527.62	27.83	N/A	N/A	N/A	N/A	N/A	N/A
chr11	34563677	34564499	823	447	34564124	71	140.32	10.02	N/A	N/A	N/A	N/A	N/A	N/A
chr11	34891615	34892364	750	330	34891945	56	182.48	14.29	chr11	34891405	34892028	LTR12_	LTR	ERV1
chr11	35132885	35133699	815	380	35133265	54	207.09	13.98	chr11	35132968	35133390	MLT1L	LTR	MaLR
chr11	36284685	36285176	492	184	36284869	32	142.85	11.85	N/A	N/A	N/A	N/A	N/A	N/A
chr11	38256201	38256607	407	244	38256445	21	139.25	21.02	chr11	38255892	38257284	LTR12C	LTR	ERV1
chr11	38696171	38696886	716	285	38696456	29	157.5	22.07	chr11	38696225	38696610	MER57B	LTR	ERV1
chr11	40271959	40272751	793	400	40272359	48	179.99	17.17	N/A	N/A	N/A	N/A	N/A	N/A
chr11	41252406	41253013	608	284	41252690	21	105.66	18.92	chr11	41252610	41252999	LTR12B	LTR	ERV1
chr11	42454978	42455725	748	387	42455365	26	112.34	16.19	chr11	42455224	42455667	MLT1K	LTR	MaLR
chr11	42789534	42790011	478	300	42789834	33	233.65	26.58	N/A	N/A	N/A	N/A	N/A	N/A
chr11	42816157	42816856	700	308	42816465	31	125.98	15.15	N/A	N/A	N/A	N/A	N/A	N/A
chr11	43036530	43037164	635	205	43036735	61	522.69	58.86	chr11	43036708	43036781	MLT1L	LTR	MaLR
chr11	43282595	43283097	503	263	43282858	27	119.84	12.1	N/A	N/A	N/A	N/A	N/A	N/A
chr11	43523476	43524342	867	443	43523919	67	509.52	53.17	chr11	43523858	43524183	MLT1I	LTR	MaLR
chr11	43658164	43659248	1085	491	43658655	395	1998.48	27.99	N/A	N/A	N/A	N/A	N/A	N/A
chr11	43858421	43859492	1072	497	43858918	295	1269.7	29	N/A	N/A	N/A	N/A	N/A	N/A
chr11	43954651	43955239	589	226	43954877	24	133.88	15.77	chr11	43954597	43954981	MLT1J1	LTR	MaLR
chr11	44378470	44379134	665	343	44378813	30	175.02	19.97	chr11	44378607	44378871	MLT1K	LTR	MaLR
chr11	44606251	44607136	886	427	44606678	89	229.06	13.16	chr11	44606633	44606771	MIR	SINE	MIR
chr11	44673126	44673657	532	295	44673421	83	541.13	28.86	chr11	44673388	44673562	MLT1K	LTR	MaLR
chr11	44800328	44801048	721	301	44800629	31	174.39	23.12	chr11	44800416	44800742	MLT1J1	LTR	MaLR
chr11	44838926	44839878	953	502	44839428	95	443.92	26.67	chr11	44839177	44839490	MLT1K	LTR	MaLR
chr11	44840165	44841214	1050	494	44840659	190	571.12	17.9	chr11	44840656	44840762	L2	LINE	L2
chr11	44877888	44878734	847	400	44878288	87	464.04	23.9	N/A	N/A	N/A	N/A	N/A	N/A
chr11	45124920	45125912	993	469	45125389	191	903.13	30.77	N/A	N/A	N/A	N/A	N/A	N/A
chr11	45231606	45232477	872	427	45232033	56	281.36	31.57	chr11	45231875	45232222	MLT1J2	LTR	MaLR
chr11	45311801	45312352	552	249	45312050	38	243.11	22.14	N/A	N/A	N/A	N/A	N/A	N/A
chr11	45556105	45557163	1059	498	45556603	244	2181.91	95.35	chr11	45556535	45556704	MLT1H	LTR	MaLR
chr11	45572102	45572601	500	196	45572298	91	953.5	68.55	chr11	45572186	45572649	MLT1K	LTR	MaLR
chr11	45624555	45625426	872	370	45624925	204	2453.48	161.87	chr11	45624844	45625182	MLT1J	LTR	MaLR
chr11	45704529	45705268	740	533	45705062	42	267.95	20.04	N/A	N/A	N/A	N/A	N/A	N/A
chr11	45773501	45774186	686	283	45773784	37	158.09	16.84	chr11	45773597	45773831	MLT1K	LTR	MaLR
chr11	45895707	45897485	1779	1265	45896972	259	608.03	13.69	N/A	N/A	N/A	N/A	N/A	N/A
chr11	45911079	45911824	746	368	45911447	45	174.96	13.84	N/A	N/A	N/A	N/A	N/A	N/A
chr11	46227519	46228315	797	477	46227996	72	366.19	22.79	N/A	N/A	N/A	N/A	N/A	N/A
chr11	46248584	46249317	734	428	46249012	66	176.92	12.27	N/A	N/A	N/A	N/A	N/A	N/A
chr11	46273476	46274227	752	316	46273792	93	737.36	51.95	N/A	N/A	N/A	N/A	N/A	N/A
chr11	46292991	46293615	625	356	46293347	169	989.33	27.67	N/A	N/A	N/A	N/A	N/A	N/A
chr11	46823661	46825203	1543	803	46824464	463	1733.92	27.91	N/A	N/A	N/A	N/A	N/A	N/A
chr11	46843233	46843925	693	430	46843663	32	142.13	20.2	N/A	N/A	N/A	N/A	N/A	N/A
chr11	47154507	47155831	1325	634	47155141	418	1881.8	26.87	N/A	N/A	N/A	N/A	N/A	N/A
chr11	47192151	47192988	838	392	47192543	63	134.43	12.51	N/A	N/A	N/A	N/A	N/A	N/A
chr11	47404175	47405148	974	493	47404668	109	186.55	10.25	N/A	N/A	N/A	N/A	N/A	N/A
chr11	47431579	47432052	474	149	47431728	20	97.67	13.94	chr11	47431553	47432031	LTR12B	LTR	ERV1
chr11	47745154	47746228	1075	584	47745738	426	1741.99	24.11	N/A	N/A	N/A	N/A	N/A	N/A
chr11	47895901	47896476	576	271	47896172	44	110.73	8.83	N/A	N/A	N/A	N/A	N/A	N/A
chr11	47928513	47929170	658	288	47928801	76	321.99	18.1	chr11	47928767	47928862	MLT1L	LTR	MaLR
chr11	56948480	56949573	1094	639	56949119	186	436.53	13.11	N/A	N/A	N/A	N/A	N/A	N/A
chr11	57089782	57090602	821	301	57090083	83	257.52	15.06	N/A	N/A	N/A	N/A	N/A	N/A
chr11	57161964	57162751	788	422	57162386	68	321.97	21.65	N/A	N/A	N/A	N/A	N/A	N/A
chr11	57190907	57192491	1585	565	57191472	445	1560.46	18.11	N/A	N/A	N/A	N/A	N/A	N/A
chr11	57235567	57237035	1469	907	57236474	720	2863.86	15.89	N/A	N/A	N/A	N/A	N/A	N/A
chr11	57285245	57286389	1145	586	57285831	216	767.65	25.1	N/A	N/A	N/A	N/A	N/A	N/A
chr11	57302358	57303054	697	319	57302677	34	139.61	15.09	N/A	N/A	N/A	N/A	N/A	N/A
chr11	58429587	58430232	646	379	58429966	25	133.69	21.02	N/A	N/A	N/A	N/A	N/A	N/A
chr11	58582214	58582894	681	373	58582587	67	350.79	25.71	N/A	N/A	N/A	N/A	N/A	N/A
chr11	58630471	58631631	1161	733	58631204	132	586.17	25.58	N/A	N/A	N/A	N/A	N/A	N/A
chr11	58666686	58667663	978	510	58667196	188	494.35	11.06	N/A	N/A	N/A	N/A	N/A	N/A
chr11	58668339	58669170	832	402	58668741	67	100.61	7.76	N/A	N/A	N/A	N/A	N/A	N/A
chr11	59138956	59141091	2136	1115	59140071	974	3100	17.02	N/A	N/A	N/A	N/A	N/A	N/A
chr11	59699741	59700533	793	438	59700179	39	235.34	21.02	N/A	N/A	N/A	N/A	N/A	N/A
chr11	59913290	59914240	951	440	59913730	77	125.42	10.06	N/A	N/A	N/A	N/A	N/A	N/A
chr11	60475938	60477093	1156	744	60476682	76	91.79	5.56	N/A	N/A	N/A	N/A	N/A	N/A
chr11	60684549	60686891	2343	774	60685323	577	1415.03	17.51	N/A	N/A	N/A	N/A	N/A	N/A
chr11	61338274	61339815	1542	483	61338757	248	803.83	16.69	chr11	61338494	61338910	LTR12B	LTR	ERV1
chr11	61351521	61352546	1026	476	61351997	176	499.31	17.21	N/A	N/A	N/A	N/A	N/A	N/A
chr11	61473361	61474257	897	444	61473805	167	1062.93	43.09	N/A	N/A	N/A	N/A	N/A	N/A
[truncated: 6,768 more rows]

## Sheet: GM_YA_peaks_Table.4
GM12878 NF-YA ChIP-Seq peaks (p-value <=1e-09)
[truncated: 290 more rows]

## Sheet: HeLa_YB_peaks_Table.5
HeLa S3 NF-YB ChIP-Seq peaks (p-value <=1e-09)										Repeat
[truncated: 5,458 more rows]

[truncated: 8 more sheets: HeLa_YA_peaks_Table.6, s_prom_YB+_TF_ovrlap_Table.7, all_enh_YB+_TF_ovrlap_Table.8, YB_DJ_TF_clustered_Table.9, K562_GO_Table.10, HeLa_GO_Table.11, GM_GO_Table.12, qPCR_primers_Table.13]
